# Supplementary material for: Co-Occurrence of L. monocytogenes with Other Bacterial Genera and Bacterial Diversity on Cleaned Conveyor Surfaces in a Swine Slaughterhouse
Source: MDPI journal article supplement (doi:10.3390/microorganisms10030613), 2022-03-14
Supplement: s1 [file s1]

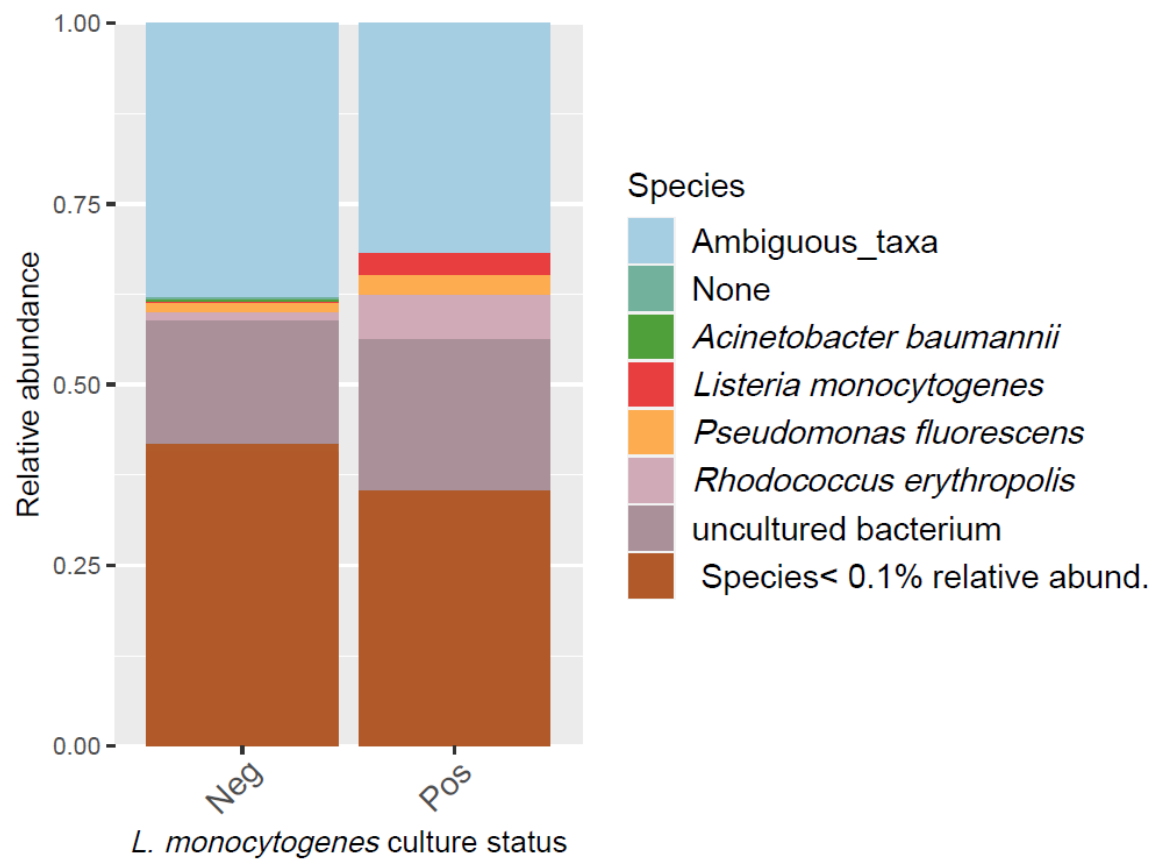

Supplementary Figure S2: Relative frequency of bacterial species identified from OTUs detected in cutting facility conveyor surfaces according to positive samples in *Listeria monocytogenes* culture-based method.
