# Supplementary material for: Co-Occurrence of L. monocytogenes with Other Bacterial Genera and Bacterial Diversity on Cleaned Conveyor Surfaces in a Swine Slaughterhouse
Source: MDPI journal article supplement (doi:10.3390/microorganisms10030613), 2022-03-14
Supplement: s1 [file s1]

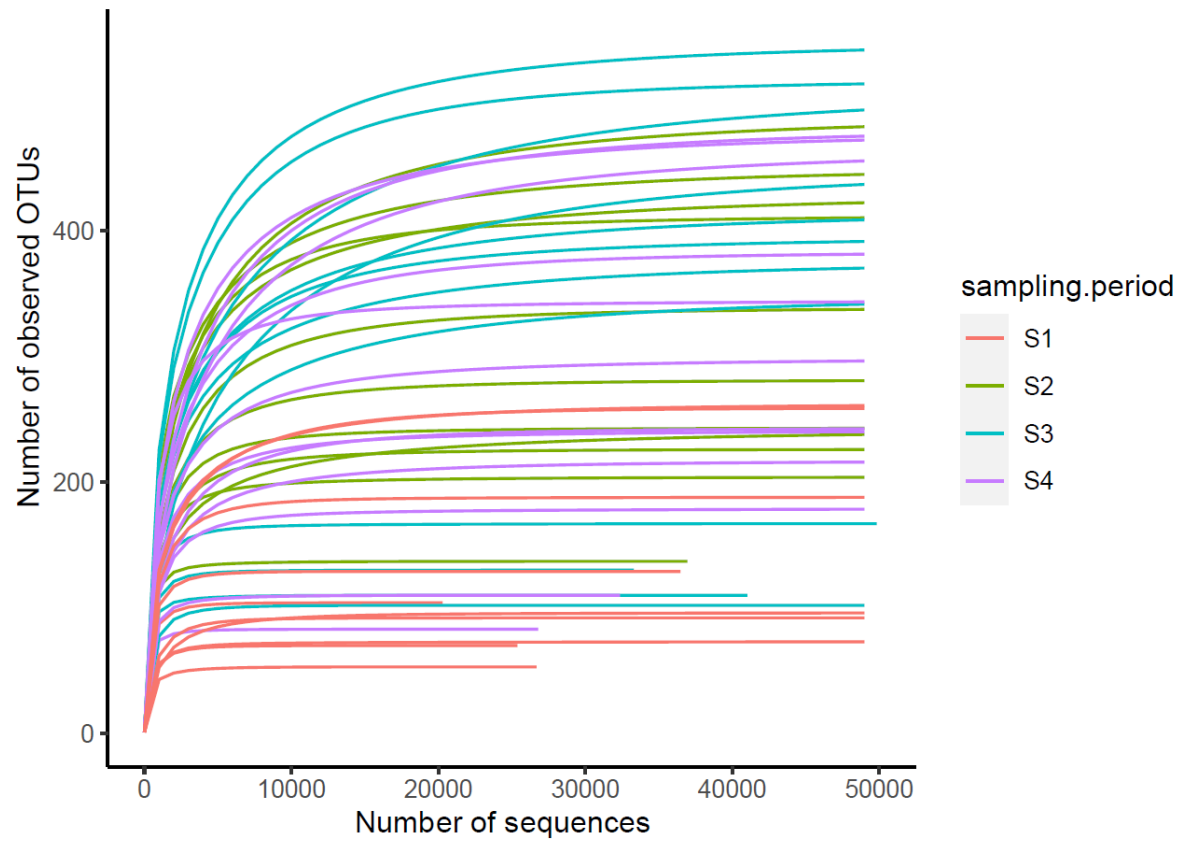

Supplementary Figure S1: Rarefaction curve of OTUs for each sample collected from meat conveyor surfaces.
