# Supplementary material for: Co-Occurrence of L. monocytogenes with Other Bacterial Genera and Bacterial Diversity on Cleaned Conveyor Surfaces in a Swine Slaughterhouse
Source: Microorganisms. 2022 Mar 14;10(3):613. doi: 10.3390/microorganisms10030613 (PMC8948719; doi:10.3390/microorganisms10030613)
Supplement: Supplementary file 1 [file microorganisms-10-00613-s001.zip]

Archive with 4 entries (4 files):
- supp_firgure S1.pdf
- supp_firgure S2.pdf
- Supp_tableS1.xlsx
- Supp_tableS2.xlsx
