# Supplementary material for: Co-Occurrence of L. monocytogenes with Other Bacterial Genera and Bacterial Diversity on Cleaned Conveyor Surfaces in a Swine Slaughterhouse
Source: Microorganisms. 2022 Mar 14;10(3):613. doi: 10.3390/microorganisms10030613 (PMC8948719; doi:10.3390/microorganisms10030613)
Supplement: Supplementary file 1 [file microorganisms-10-00613-s001.zip › Supp_tableS1.xlsx]

## Sheet: Feuil1
	Sample ID	Conveyor ID	Number of sequences	Listeria monocytogenes Cuture status	Sampling visit	Number of observed OTU	Shannon diversity	Evenness
	pD01D1	I	20287	pos	S1	104	3.30	0.71
	pD02D2	I	26685	pos	S1	53	1.99	0.50
	pD02D3	I	93005	neg	S1	252	3.69	0.67
	pD02D4	II	156164	neg	S1	253	3.52	0.64
	pD02D5	II	36472	neg	S1	129	2.72	0.56
	pD02D6	II	80139	neg	S1	92	1.36	0.30
	pD02D7	III	25377	pos	S1	70	1.69	0.39
	pD02D8	III	59060	pos	S1	73	1.74	0.41
	pD02D9	III	58919	pos	S1	188	3.02	0.58
	pD02D10	IV	75244	neg	S1	92	1.75	0.39
	pD02D11	IV	NA1	neg	S1	NA	NA	NA
	pD02D12	IV	NA	pos	S1	NA	NA	NA
	pD022C1	I	36961	neg	S2	327	4.15	0.72
	pD022C2	I	NA	neg	S2	392	4.66	0.78
	pD022C3	I	142530	neg	S2	327	4.15	0.72
	pD022C4	II	161632	neg	S2	392	4.66	0.78
	pD022C5	II	92221	neg	S2	201	4.24	0.80
	pD022C6	II	114060	pos	S2	242	3.94	0.72
	pD022C7	III	140320	pos	S2	402	4.63	0.77
	pD022C8	III	65939	neg	S2	222	4.05	0.75
	pD022C9	III	184978	pos	S2	452	4.30	0.70
	pD022C10	IV	84982	pos	S2	274	4.02	0.72
	pD022C11	IV	199760	pos	S2	226	4.15	0.76
	pD022C12	IV	191279	neg	S2	421	4.88	0.81
	pD023C1	I	33304	neg	S3	130	3.77	0.77
	pD023C2	I	194901	neg	S3	386	3.51	0.59
	pD023C3	I	49835	neg	S3	167	3.95	0.77
	pD023C10	IV	159193	neg	S3	376	4.34	0.73
	pD023C11	IV	41033	neg	S3	109	3.63	0.77
	pD023C12	IV	160832	neg	S3	497	4.76	0.76
	pD023C4	II	229410	neg	S3	452	4.21	0.69
	pD023C5	II	55725	neg	S3	102	2.72	0.59
	pD023C6	II	152166	neg	S3	524	4.78	0.76
	pD023C7	III	145555	pos	S3	320	4.15	0.72
	pD023C8	III	168825	neg	S3	381	4.54	0.76
	pD023C9	III	142398	neg	S3	348	4.50	0.77
	pD024C1	I	26802	neg	S4	83	3.46	0.78
	pD024C2	I	166913	neg	S4	445	3.75	0.61
	pD024C3	I	163044	neg	S4	286	4.04	0.71
	pD024C4	II	99944	neg	S4	235	3.25	0.59
	pD024C5	II	218301	neg	S4	419	3.16	0.52
	pD024C6	II	96811	neg	S4	236	3.78	0.69
	pD024C7	III	135563	neg	S4	448	4.47	0.73
	pD024C8	III	91433	neg	S4	336	4.60	0.79
	pD024C9	III	143662	pos	S4	366	4.03	0.68
	pD024C10	IV	32345	neg	S4	109	3.39	0.72
	pD024C11	IV	168720	neg	S4	210	3.19	0.59
	pD024C12	IV	101073	neg	S4	176	3.30	0.64
	Control 1	I	19472	neg	NA	NA	NA	NA
	Control 2	IV	74	neg	NA	NA	NA	NA
	1 NA: the sequencing did not performed on these samples as the amount of DNA was not sufficient
