# Supplementary material for: Co-Occurrence of L. monocytogenes with Other Bacterial Genera and Bacterial Diversity on Cleaned Conveyor Surfaces in a Swine Slaughterhouse
Source: Microorganisms. 2022 Mar 14;10(3):613. doi: 10.3390/microorganisms10030613 (PMC8948719; doi:10.3390/microorganisms10030613)
Supplement: Supplementary file 1 [file microorganisms-10-00613-s001.zip › Supp_tableS2.xlsx]

## Sheet: Nodes
Id	Label	timeset	SUID	shared name	name	selected	lineage	posdegree	abundance	degree	kingdom	oriID	unknowndegree	phylum	genus	species	negdegree	taxon	family	samplecount	class	order
13611	OTU-OTU73		13611	OTU-OTU73	OTU-OTU73	FALSE	Bacteria--Proteobacteria--Alphaproteobacteria--Rhizobiales--Brucellaceae--Ochrobactrum--OTU_OTU73	1	0.044206	4	Bacteria	OTU-OTU73	0	Proteobacteria	Ochrobactrum	none	3	OTU_OTU73	Brucellaceae	36	Alphaproteobacteria	Rhizobiales
13578	OTU-OTU94		13578	OTU-OTU94	OTU-OTU94	FALSE	Bacteria--Bacteroidetes--Flavobacteriia--Flavobacteriales--Flavobacteriaceae--Cloacibacterium--OTU_OTU94	5	0.232468	6	Bacteria	OTU-OTU94	0	Bacteroidetes	Cloacibacterium	none	1	OTU_OTU94	Flavobacteriaceae	29	Flavobacteriia	Flavobacteriales
13364	OTU-OTU57		13364	OTU-OTU57	OTU-OTU57	FALSE	Bacteria--Actinobacteria--Actinobacteria1--Actinomycetales--Actinomycetaceae--Actinomyces--OTU_OTU57	4	0.04165	11	Bacteria	OTU-OTU57	0	Actinobacteria	Actinomyces	none	7	OTU_OTU57	Actinomycetaceae	22	Actinobacteria	Actinomycetales
13229	OTU-OTU47		13229	OTU-OTU47	OTU-OTU47	FALSE	Bacteria--Firmicutes--Clostridia--Clostridiales--Clostridiaceae 1--Clostridium sensu stricto 1--OTU_OTU47	3	0.028634	4	Bacteria	OTU-OTU47	0	Firmicutes	Clostridium sensu stricto 1	none	1	OTU_OTU47	Clostridiaceae 1	24	Clostridia	Clostridiales
13191	OTU-OTU90		13191	OTU-OTU90	OTU-OTU90	FALSE	Bacteria--Firmicutes--Bacilli--Lactobacillales--Streptococcaceae--Streptococcus--OTU_OTU90	5	0.118554	5	Bacteria	OTU-OTU90	0	Firmicutes	Streptococcus	none	0	OTU_OTU90	Streptococcaceae	41	Bacilli	Lactobacillales
13177	OTU-OTU51		13177	OTU-OTU51	OTU-OTU51	FALSE	Bacteria--Proteobacteria--Alphaproteobacteria--Sphingomonadales--Sphingomonadaceae--Sphingobium--OTU_OTU51	6	0.034232	6	Bacteria	OTU-OTU51	0	Proteobacteria	Sphingobium	none	0	OTU_OTU51	Sphingomonadaceae	24	Alphaproteobacteria	Sphingomonadales
13169	OTU-OTU91		13169	OTU-OTU91	OTU-OTU91	FALSE	Bacteria--Actinobacteria--Actinobacteria1--Micrococcales--Micrococcaceae--Rothia--OTU_OTU91	3	0.054304	4	Bacteria	OTU-OTU91	0	Actinobacteria	Rothia	none	1	OTU_OTU91	Micrococcaceae	31	Actinobacteria	Micrococcales
13128	OTU-OTU102		13128	OTU-OTU102	OTU-OTU102	FALSE	Bacteria--Actinobacteria--Actinobacteria1--Micrococcales--Microbacteriaceae--Microbacterium--OTU_OTU102	39	0.172061	43	Bacteria	OTU-OTU102	0	Actinobacteria	Microbacterium	none	4	OTU_OTU102	Microbacteriaceae	37	Actinobacteria	Micrococcales
13115	OTU-OTU93		13115	OTU-OTU93	OTU-OTU93	FALSE	Bacteria--Actinobacteria--Actinobacteria1--Propionibacteriales--Propionibacteriaceae--Propionibacterium--OTU_OTU93	7	1.30615	27	Bacteria	OTU-OTU93	0	Actinobacteria	Propionibacterium	none	20	OTU_OTU93	Propionibacteriaceae	45	Actinobacteria	Propionibacteriales
13110	OTU-OTU82		13110	OTU-OTU82	OTU-OTU82	FALSE	Bacteria--Bacteroidetes--Sphingobacteriia--Sphingobacteriales--Sphingobacteriaceae--Sphingobacterium--OTU_OTU82	34	0.033774	39	Bacteria	OTU-OTU82	0	Bacteroidetes	Sphingobacterium	none	5	OTU_OTU82	Sphingobacteriaceae	27	Sphingobacteriia	Sphingobacteriales
13104	OTU-OTU59		13104	OTU-OTU59	OTU-OTU59	FALSE	Bacteria--Bacteroidetes--Cytophagia--Cytophagales--Cytophagaceae--Spirosoma--OTU_OTU59	20	0	25	Bacteria	OTU-OTU59	0	Bacteroidetes	Spirosoma	none	5	OTU_OTU59	Cytophagaceae	0	Cytophagia	Cytophagales
13089	OTU-OTU9		13089	OTU-OTU9	OTU-OTU9	FALSE	Bacteria--Firmicutes--Bacilli--Lactobacillales--Enterococcaceae--Enterococcus--OTU_OTU9	12	0.06262	15	Bacteria	OTU-OTU9	0	Firmicutes	Enterococcus	none	3	OTU_OTU9	Enterococcaceae	26	Bacilli	Lactobacillales
13066	OTU-OTU41		13066	OTU-OTU41	OTU-OTU41	FALSE	Bacteria--Deinococcus-Thermus--Deinococci--Deinococcales--Deinococcaceae--Deinococcus--OTU_OTU41	8	0.150444	12	Bacteria	OTU-OTU41	0	Deinococcus-Thermus	Deinococcus	none	4	OTU_OTU41	Deinococcaceae	30	Deinococci	Deinococcales
13046	OTU-OTU33		13046	OTU-OTU33	OTU-OTU33	FALSE	Bacteria--Proteobacteria--Betaproteobacteria--Burkholderiales--Oxalobacteraceae--Herminiimonas--OTU_OTU33	15	0.134139	18	Bacteria	OTU-OTU33	0	Proteobacteria	Herminiimonas	none	3	OTU_OTU33	Oxalobacteraceae	35	Betaproteobacteria	Burkholderiales
13042	OTU-OTU39		13042	OTU-OTU39	OTU-OTU39	FALSE	Bacteria--Proteobacteria--Alphaproteobacteria--Rhizobiales--Bradyrhizobiaceae--Bradyrhizobium--OTU_OTU39	16	0.781225	18	Bacteria	OTU-OTU39	0	Proteobacteria	Bradyrhizobium	none	2	OTU_OTU39	Bradyrhizobiaceae	43	Alphaproteobacteria	Rhizobiales
13023	OTU-OTU3		13023	OTU-OTU3	OTU-OTU3	FALSE	Bacteria--Proteobacteria--Gammaproteobacteria--Xanthomonadales--Xanthomonadaceae--Lysobacter--OTU_OTU3	19	0.037422	20	Bacteria	OTU-OTU3	0	Proteobacteria	Lysobacter	none	1	OTU_OTU3	Xanthomonadaceae	23	Gammaproteobacteria	Xanthomonadales
13011	OTU-OTU7		13011	OTU-OTU7	OTU-OTU7	FALSE	Bacteria--Actinobacteria--Thermoleophilia--Solirubrobacterales--Patulibacteraceae--Patulibacter--OTU_OTU7	34	0.052058	39	Bacteria	OTU-OTU7	0	Actinobacteria	Patulibacter	none	5	OTU_OTU7	Patulibacteraceae	26	Thermoleophilia	Solirubrobacterales
13005	OTU-OTU84		13005	OTU-OTU84	OTU-OTU84	FALSE	Bacteria--Proteobacteria--Gammaproteobacteria--Xanthomonadales--Xanthomonadaceae--Stenotrophomonas--OTU_OTU84	3	0.57845	4	Bacteria	OTU-OTU84	0	Proteobacteria	Stenotrophomonas	none	1	OTU_OTU84	Xanthomonadaceae	43	Gammaproteobacteria	Xanthomonadales
13000	OTU-OTU88		13000	OTU-OTU88	OTU-OTU88	FALSE	Bacteria--Acidobacteria--Solibacteres--Solibacterales--Solibacteraceae (Subgroup 3)--Bryobacter--OTU_OTU88	15	0.040943	18	Bacteria	OTU-OTU88	0	Acidobacteria	Bryobacter	none	3	OTU_OTU88	Solibacteraceae (Subgroup 3)	29	Solibacteres	Solibacterales
12998	OTU-OTU48		12998	OTU-OTU48	OTU-OTU48	FALSE	Bacteria--Proteobacteria--Alphaproteobacteria--Caulobacterales--Caulobacteraceae--Caulobacter--OTU_OTU48	15	3.60286	18	Bacteria	OTU-OTU48	0	Proteobacteria	Caulobacter	none	3	OTU_OTU48	Caulobacteraceae	39	Alphaproteobacteria	Caulobacterales
12991	OTU-OTU71		12991	OTU-OTU71	OTU-OTU71	FALSE	Bacteria--Elusimicrobia--Elusimicrobia1--Lineage IV--uncultured bacterium--uncultured bacteriumcross3--OTU_OTU71	12	0.053754	16	Bacteria	OTU-OTU71	0	Elusimicrobia	none	none	4	OTU_OTU71	uncultured bacterium	33	Elusimicrobia	Lineage IV
12985	OTU-OTU103		12985	OTU-OTU103	OTU-OTU103	FALSE	Bacteria--Actinobacteria--Actinobacteria1--Micrococcales--Brevibacteriaceae--Brevibacterium--OTU_OTU103	7	0.086183	10	Bacteria	OTU-OTU103	0	Actinobacteria	Brevibacterium	none	3	OTU_OTU103	Brevibacteriaceae	30	Actinobacteria	Micrococcales
12969	OTU-OTU24		12969	OTU-OTU24	OTU-OTU24	FALSE	Bacteria--Actinobacteria--Actinobacteria1--Propionibacteriales--Nocardioidaceae--Nocardioides--OTU_OTU24	24	0.201535	26	Bacteria	OTU-OTU24	0	Actinobacteria	Nocardioides	none	2	OTU_OTU24	Nocardioidaceae	38	Actinobacteria	Propionibacteriales
12955	OTU-OTU15		12955	OTU-OTU15	OTU-OTU15	FALSE	Bacteria--Cyanobacteria--Melainabacteria--Obscuribacterales--uncultured bacterium--OTU_OTU15	19	0.026617	23	Bacteria	OTU-OTU15	0	Cyanobacteria	none	none	4	OTU_OTU15	uncultured bacterium	24	Melainabacteria	Obscuribacterales
12943	OTU-OTU35		12943	OTU-OTU35	OTU-OTU35	FALSE	Bacteria--Proteobacteria--Alphaproteobacteria--Sphingomonadales--Sphingomonadaceae--Sphingomonas--OTU_OTU35	27	7.7032	29	Bacteria	OTU-OTU35	0	Proteobacteria	Sphingomonas	none	2	OTU_OTU35	Sphingomonadaceae	45	Alphaproteobacteria	Sphingomonadales
12937	OTU-OTU97		12937	OTU-OTU97	OTU-OTU97	FALSE	Bacteria--Proteobacteria--Betaproteobacteria--Burkholderiales--Comamonadaceae--Aquabacterium--OTU_OTU97	4	0.073609	6	Bacteria	OTU-OTU97	0	Proteobacteria	Aquabacterium	none	2	OTU_OTU97	Comamonadaceae	21	Betaproteobacteria	Burkholderiales
12931	OTU-OTU28		12931	OTU-OTU28	OTU-OTU28	FALSE	Bacteria--Proteobacteria--Alphaproteobacteria--Rhodospirillales--Acetobacteraceae--Roseomonas--OTU_OTU28	28	0.066704	33	Bacteria	OTU-OTU28	0	Proteobacteria	Roseomonas	none	5	OTU_OTU28	Acetobacteraceae	27	Alphaproteobacteria	Rhodospirillales
12922	OTU-OTU44		12922	OTU-OTU44	OTU-OTU44	FALSE	Bacteria--Proteobacteria--Alphaproteobacteria--Rhizobiales--Phyllobacteriaceae--Mesorhizobium--OTU_OTU44	20	0.02698	23	Bacteria	OTU-OTU44	0	Proteobacteria	Mesorhizobium	none	3	OTU_OTU44	Phyllobacteriaceae	26	Alphaproteobacteria	Rhizobiales
12920	OTU-OTU46		12920	OTU-OTU46	OTU-OTU46	FALSE	Bacteria--Proteobacteria--Alphaproteobacteria--Rhizobiales--Aurantimonadaceae--Aureimonas--OTU_OTU46	28	0.035638	30	Bacteria	OTU-OTU46	0	Proteobacteria	Aureimonas	none	2	OTU_OTU46	Aurantimonadaceae	30	Alphaproteobacteria	Rhizobiales
12917	OTU-OTU30		12917	OTU-OTU30	OTU-OTU30	FALSE	Bacteria--Actinobacteria--Actinobacteria1--Corynebacteriales--Corynebacteriaceae--Lawsonella--OTU_OTU30	6	0.062221	14	Bacteria	OTU-OTU30	0	Actinobacteria	Lawsonella	none	8	OTU_OTU30	Corynebacteriaceae	33	Actinobacteria	Corynebacteriales
12914	OTU-OTU34		12914	OTU-OTU34	OTU-OTU34	FALSE	Bacteria--Proteobacteria--Alphaproteobacteria--Rhizobiales--Methylobacteriaceae--Methylobacterium--OTU_OTU34	24	1.63657	27	Bacteria	OTU-OTU34	0	Proteobacteria	Methylobacterium	none	3	OTU_OTU34	Methylobacteriaceae	42	Alphaproteobacteria	Rhizobiales
12908	OTU-OTU11		12908	OTU-OTU11	OTU-OTU11	FALSE	Bacteria--Actinobacteria--Actinobacteria1--Corynebacteriales--Nocardiaceae--Williamsia--OTU_OTU11	20	0.042288	25	Bacteria	OTU-OTU11	0	Actinobacteria	Williamsia	none	5	OTU_OTU11	Nocardiaceae	21	Actinobacteria	Corynebacteriales
12903	OTU-OTU56		12903	OTU-OTU56	OTU-OTU56	FALSE	Bacteria--Chloroflexi--Thermomicrobia--JG30-KF-CM45--uncultured bacterium--uncultured bacteriumcross2--OTU_OTU56	18	0.037962	20	Bacteria	OTU-OTU56	0	Chloroflexi	none	none	2	OTU_OTU56	uncultured bacterium	22	Thermomicrobia	JG30-KF-CM45
12896	OTU-OTU1		12896	OTU-OTU1	OTU-OTU1	FALSE	Bacteria--Actinobacteria--Actinobacteria1--Micrococcales--Micrococcaceae--Kocuria--OTU_OTU1	27	0.059088	31	Bacteria	OTU-OTU1	0	Actinobacteria	Kocuria	none	4	OTU_OTU1	Micrococcaceae	28	Actinobacteria	Micrococcales
12895	OTU-OTU25		12895	OTU-OTU25	OTU-OTU25	FALSE	Bacteria--Actinobacteria--Actinobacteria1--Propionibacteriales--Nocardioidaceae--Aeromicrobium--OTU_OTU25	29	0.029639	35	Bacteria	OTU-OTU25	0	Actinobacteria	Aeromicrobium	none	6	OTU_OTU25	Nocardioidaceae	26	Actinobacteria	Propionibacteriales
12886	OTU-OTU54		12886	OTU-OTU54	OTU-OTU54	FALSE	Bacteria--Proteobacteria--Gammaproteobacteria--Pseudomonadales--Pseudomonadaceae--Pseudomonas--OTU_OTU54	6	8.93814	27	Bacteria	OTU-OTU54	0	Proteobacteria	Pseudomonas	none	21	OTU_OTU54	Pseudomonadaceae	45	Gammaproteobacteria	Pseudomonadales
12884	OTU-OTU55		12884	OTU-OTU55	OTU-OTU55	FALSE	Bacteria--Firmicutes--Bacilli--Lactobacillales--Lactobacillaceae--Lactobacillus--OTU_OTU55	2	0.080983	23	Bacteria	OTU-OTU55	0	Firmicutes	Lactobacillus	none	21	OTU_OTU55	Lactobacillaceae	24	Bacilli	Lactobacillales
12881	OTU-OTU109		12881	OTU-OTU109	OTU-OTU109	FALSE	Bacteria--Bacteroidetes--Flavobacteriia--Flavobacteriales--Flavobacteriaceae--Empedobacter--OTU_OTU109	16	0.030122	18	Bacteria	OTU-OTU109	0	Bacteroidetes	Empedobacter	none	2	OTU_OTU109	Flavobacteriaceae	20	Flavobacteriia	Flavobacteriales
12879	OTU-OTU58		12879	OTU-OTU58	OTU-OTU58	FALSE	Bacteria--Firmicutes--Bacilli--Bacillales--Family XII--Exiguobacterium--OTU_OTU58	10	0.040877	13	Bacteria	OTU-OTU58	0	Firmicutes	Exiguobacterium	none	3	OTU_OTU58	Family XII	22	Bacilli	Bacillales
12875	OTU-OTU16		12875	OTU-OTU16	OTU-OTU16	FALSE	Bacteria--Actinobacteria--Actinobacteria1--Propionibacteriales--Propionibacteriaceae--Luteococcus--OTU_OTU16	36	0.116745	44	Bacteria	OTU-OTU16	0	Actinobacteria	Luteococcus	none	8	OTU_OTU16	Propionibacteriaceae	26	Actinobacteria	Propionibacteriales
12870	OTU-OTU76		12870	OTU-OTU76	OTU-OTU76	FALSE	Bacteria--Fusobacteria--Fusobacteriia--Fusobacteriales--Fusobacteriaceae--Fusobacterium--OTU_OTU76	4	0.027951	9	Bacteria	OTU-OTU76	0	Fusobacteria	Fusobacterium	none	5	OTU_OTU76	Fusobacteriaceae	21	Fusobacteriia	Fusobacteriales
12868	OTU-OTU105		12868	OTU-OTU105	OTU-OTU105	FALSE	Bacteria--Firmicutes--Bacilli--Bacillales--Staphylococcaceae--Staphylococcus--OTU_OTU105	6	0.280046	13	Bacteria	OTU-OTU105	0	Firmicutes	Staphylococcus	none	7	OTU_OTU105	Staphylococcaceae	41	Bacilli	Bacillales
12865	OTU-OTU107		12865	OTU-OTU107	OTU-OTU107	FALSE	Bacteria--Actinobacteria--Actinobacteria1--Micrococcales--Micrococcaceae--Paeniglutamicibacter--OTU_OTU107	25	0.109401	30	Bacteria	OTU-OTU107	0	Actinobacteria	Paeniglutamicibacter	none	5	OTU_OTU107	Micrococcaceae	21	Actinobacteria	Micrococcales
12862	OTU-OTU112		12862	OTU-OTU112	OTU-OTU112	FALSE	Bacteria--Proteobacteria--Alphaproteobacteria--Rhizobiales--Bradyrhizobiaceae--Rhodopseudomonas--OTU_OTU112	29	0.157208	36	Bacteria	OTU-OTU112	0	Proteobacteria	Rhodopseudomonas	none	7	OTU_OTU112	Bradyrhizobiaceae	31	Alphaproteobacteria	Rhizobiales
12861	OTU-OTU4		12861	OTU-OTU4	OTU-OTU4	FALSE	Bacteria--Proteobacteria--Gammaproteobacteria--Pseudomonadales--Moraxellaceae--Psychrobacter--OTU_OTU4	35	0.309864	40	Bacteria	OTU-OTU4	0	Proteobacteria	Psychrobacter	none	5	OTU_OTU4	Moraxellaceae	34	Gammaproteobacteria	Pseudomonadales
12858	OTU-OTU64		12858	OTU-OTU64	OTU-OTU64	FALSE	Bacteria--Proteobacteria--Alphaproteobacteria--Sphingomonadales--Sphingomonadaceae--Zymomonas--OTU_OTU64	30	0.333372	36	Bacteria	OTU-OTU64	0	Proteobacteria	Zymomonas	none	6	OTU_OTU64	Sphingomonadaceae	32	Alphaproteobacteria	Sphingomonadales
12853	OTU-OTU20		12853	OTU-OTU20	OTU-OTU20	FALSE	Bacteria--Proteobacteria--Gammaproteobacteria--Aeromonadales--Aeromonadaceae--Aeromonas--OTU_OTU20	5	0.162068	5	Bacteria	OTU-OTU20	0	Proteobacteria	Aeromonas	none	0	OTU_OTU20	Aeromonadaceae	43	Gammaproteobacteria	Aeromonadales
12849	OTU-OTU86		12849	OTU-OTU86	OTU-OTU86	FALSE	Bacteria--Proteobacteria--Betaproteobacteria--Burkholderiales--Burkholderiaceae--Burkholderia-Paraburkholderia--OTU_OTU86	8	0.201711	8	Bacteria	OTU-OTU86	0	Proteobacteria	Burkholderia-Paraburkholderia	none	0	OTU_OTU86	Burkholderiaceae	40	Betaproteobacteria	Burkholderiales
12847	OTU-OTU27		12847	OTU-OTU27	OTU-OTU27	FALSE	Bacteria--Bacteroidetes--Sphingobacteriia--Sphingobacteriales--Sphingobacteriaceae--Mucilaginibacter--OTU_OTU27	40	0.086254	45	Bacteria	OTU-OTU27	0	Bacteroidetes	Mucilaginibacter	none	5	OTU_OTU27	Sphingobacteriaceae	27	Sphingobacteriia	Sphingobacteriales
12844	OTU-OTU29		12844	OTU-OTU29	OTU-OTU29	FALSE	Bacteria--Firmicutes--Bacilli--Lactobacillales--Carnobacteriaceae--Carnobacterium--OTU_OTU29	31	0.047938	35	Bacteria	OTU-OTU29	0	Firmicutes	Carnobacterium	none	4	OTU_OTU29	Carnobacteriaceae	24	Bacilli	Lactobacillales
12842	OTU-OTU92		12842	OTU-OTU92	OTU-OTU92	FALSE	Bacteria--Actinobacteria--Actinobacteria1--Corynebacteriales--Corynebacteriaceae--Corynebacterium 1--OTU_OTU92	8	0.093143	14	Bacteria	OTU-OTU92	0	Actinobacteria	Corynebacterium 1	none	6	OTU_OTU92	Corynebacteriaceae	33	Actinobacteria	Corynebacteriales
12839	OTU-OTU72		12839	OTU-OTU72	OTU-OTU72	FALSE	Bacteria--Bacteroidetes--Cytophagia--Cytophagales--Cytophagaceae--Dyadobacter--OTU_OTU72	45	0.111281	50	Bacteria	OTU-OTU72	0	Bacteroidetes	Dyadobacter	none	5	OTU_OTU72	Cytophagaceae	31	Cytophagia	Cytophagales
12837	OTU-OTU77		12837	OTU-OTU77	OTU-OTU77	FALSE	Bacteria--Proteobacteria--Epsilonproteobacteria--Campylobacterales--Campylobacteraceae--Arcobacter--OTU_OTU77	22	0.082336	27	Bacteria	OTU-OTU77	0	Proteobacteria	Arcobacter	none	5	OTU_OTU77	Campylobacteraceae	22	Epsilonproteobacteria	Campylobacterales
12835	OTU-OTU79		12835	OTU-OTU79	OTU-OTU79	FALSE	Bacteria--Actinobacteria--Actinobacteria1--Micrococcales--Sanguibacteraceae--Sanguibacter--OTU_OTU79	18	0.043094	23	Bacteria	OTU-OTU79	0	Actinobacteria	Sanguibacter	none	5	OTU_OTU79	Sanguibacteraceae	24	Actinobacteria	Micrococcales
12833	OTU-OTU36		12833	OTU-OTU36	OTU-OTU36	FALSE	Bacteria--Proteobacteria--Alphaproteobacteria--Caulobacterales--Caulobacteraceae--Brevundimonas--OTU_OTU36	36	0.527316	43	Bacteria	OTU-OTU36	0	Proteobacteria	Brevundimonas	none	7	OTU_OTU36	Caulobacteraceae	40	Alphaproteobacteria	Caulobacterales
12830	OTU-OTU38		12830	OTU-OTU38	OTU-OTU38	FALSE	Bacteria--Proteobacteria--Gammaproteobacteria--Pseudomonadales--Moraxellaceae--Acinetobacter--OTU_OTU38	26	5.00841	26	Bacteria	OTU-OTU38	0	Proteobacteria	Acinetobacter	none	0	OTU_OTU38	Moraxellaceae	45	Gammaproteobacteria	Pseudomonadales
12828	OTU-OTU60		12828	OTU-OTU60	OTU-OTU60	FALSE	Bacteria--Acidobacteria--Blastocatellia--Blastocatellales--Blastocatellaceae (Subgroup 4)--Blastocatella--OTU_OTU60	25	0.362074	31	Bacteria	OTU-OTU60	0	Acidobacteria	Blastocatella	none	6	OTU_OTU60	Blastocatellaceae (Subgroup 4)	30	Blastocatellia	Blastocatellales
12826	OTU-OTU80		12826	OTU-OTU80	OTU-OTU80	FALSE	Bacteria--Bacteroidetes--Flavobacteriia--Flavobacteriales--Flavobacteriaceae--Chryseobacterium--OTU_OTU80	36	2.55736	38	Bacteria	OTU-OTU80	0	Bacteroidetes	Chryseobacterium	none	2	OTU_OTU80	Flavobacteriaceae	43	Flavobacteriia	Flavobacteriales
12824	OTU-OTU85		12824	OTU-OTU85	OTU-OTU85	FALSE	Bacteria--Proteobacteria--Gammaproteobacteria--Enterobacteriales--Enterobacteriaceae--Serratia--OTU_OTU85	17	0.076028	21	Bacteria	OTU-OTU85	0	Proteobacteria	Serratia	none	4	OTU_OTU85	Enterobacteriaceae	33	Gammaproteobacteria	Enterobacteriales
12822	OTU-OTU87		12822	OTU-OTU87	OTU-OTU87	FALSE	Bacteria--Actinobacteria--Actinobacteria1--Corynebacteriales--Nocardiaceae--Rhodococcus--OTU_OTU87	42	0.45566	48	Bacteria	OTU-OTU87	0	Actinobacteria	Rhodococcus	none	6	OTU_OTU87	Nocardiaceae	39	Actinobacteria	Corynebacteriales
12819	OTU-OTU89		12819	OTU-OTU89	OTU-OTU89	FALSE	Bacteria--Proteobacteria--Alphaproteobacteria--Rhodobacterales--Rhodobacteraceae--Rhodobacter--OTU_OTU89	40	0.02943	44	Bacteria	OTU-OTU89	0	Proteobacteria	Rhodobacter	none	4	OTU_OTU89	Rhodobacteraceae	21	Alphaproteobacteria	Rhodobacterales
12817	OTU-OTU40		12817	OTU-OTU40	OTU-OTU40	FALSE	Bacteria--Proteobacteria--Betaproteobacteria--Burkholderiales--Alcaligenaceae--Achromobacter--OTU_OTU40	4	0.472316	58	Bacteria	OTU-OTU40	0	Proteobacteria	Achromobacter	none	54	OTU_OTU40	Alcaligenaceae	32	Betaproteobacteria	Burkholderiales
12814	OTU-OTU108		12814	OTU-OTU108	OTU-OTU108	FALSE	Bacteria--Actinobacteria--Actinobacteria1--Micrococcales--Micrococcaceae--Micrococcus--OTU_OTU108	10	0.064591	11	Bacteria	OTU-OTU108	0	Actinobacteria	Micrococcus	none	1	OTU_OTU108	Micrococcaceae	35	Actinobacteria	Micrococcales
12813	OTU-OTU49		12813	OTU-OTU49	OTU-OTU49	FALSE	Bacteria--Proteobacteria--Alphaproteobacteria--Caulobacterales--Caulobacteraceae--uncultured--unculturedcross1--OTU_OTU49	11	0.11189	12	Bacteria	OTU-OTU49	0	Proteobacteria	uncultured	none	1	OTU_OTU49	Caulobacteraceae	34	Alphaproteobacteria	Caulobacterales
12810	OTU-OTU45		12810	OTU-OTU45	OTU-OTU45	FALSE	Bacteria--Proteobacteria--Gammaproteobacteria--Pseudomonadales--Moraxellaceae--Alkanindiges--OTU_OTU45	41	0.389792	49	Bacteria	OTU-OTU45	0	Proteobacteria	Alkanindiges	none	8	OTU_OTU45	Moraxellaceae	33	Gammaproteobacteria	Pseudomonadales
12808	OTU-OTU21		12808	OTU-OTU21	OTU-OTU21	FALSE	Bacteria--Proteobacteria--Gammaproteobacteria--Xanthomonadales--Xanthomonadaceae--Pseudoxanthomonas--OTU_OTU21	36	0.050755	41	Bacteria	OTU-OTU21	0	Proteobacteria	Pseudoxanthomonas	none	5	OTU_OTU21	Xanthomonadaceae	23	Gammaproteobacteria	Xanthomonadales
12806	OTU-OTU22		12806	OTU-OTU22	OTU-OTU22	FALSE	Bacteria--Actinobacteria--Actinobacteria1--Micrococcales--Microbacteriaceae--Pseudoclavibacter--OTU_OTU22	25	0	32	Bacteria	OTU-OTU22	0	Actinobacteria	Pseudoclavibacter	none	7	OTU_OTU22	Microbacteriaceae	0	Actinobacteria	Micrococcales
12804	OTU-OTU100		12804	OTU-OTU100	OTU-OTU100	FALSE	Bacteria--Proteobacteria--Alphaproteobacteria--Rhodobacterales--Rhodobacteraceae--Paracoccus--OTU_OTU100	46	0.205935	51	Bacteria	OTU-OTU100	0	Proteobacteria	Paracoccus	none	5	OTU_OTU100	Rhodobacteraceae	35	Alphaproteobacteria	Rhodobacterales
12802	OTU-OTU101		12802	OTU-OTU101	OTU-OTU101	FALSE	Bacteria--Proteobacteria--Alphaproteobacteria--Rhizobiales--Bradyrhizobiaceae--Bosea--OTU_OTU101	20	0.036664	23	Bacteria	OTU-OTU101	0	Proteobacteria	Bosea	none	3	OTU_OTU101	Bradyrhizobiaceae	30	Alphaproteobacteria	Rhizobiales
12801	OTU-OTU12		12801	OTU-OTU12	OTU-OTU12	FALSE	Bacteria--Proteobacteria--Alphaproteobacteria--Rhizobiales--Beijerinckiaceae--uncultured--OTU_OTU12	11	0.032339	14	Bacteria	OTU-OTU12	0	Proteobacteria	uncultured	none	3	OTU_OTU12	Beijerinckiaceae	25	Alphaproteobacteria	Rhizobiales
12798	OTU-OTU98		12798	OTU-OTU98	OTU-OTU98	FALSE	Bacteria--Firmicutes--Bacilli--Bacillales--Listeriaceae--Listeria--OTU_OTU98	1	0.633485	46	Bacteria	OTU-OTU98	0	Firmicutes	Listeria	none	45	OTU_OTU98	Listeriaceae	24	Bacilli	Bacillales
12796	OTU-OTU99		12796	OTU-OTU99	OTU-OTU99	FALSE	Bacteria--Actinobacteria--Actinobacteria1--Micrococcales--Microbacteriaceae--Leucobacter--OTU_OTU99	35	0.072319	41	Bacteria	OTU-OTU99	0	Actinobacteria	Leucobacter	none	6	OTU_OTU99	Microbacteriaceae	26	Actinobacteria	Micrococcales
12795	OTU-OTU81		12795	OTU-OTU81	OTU-OTU81	FALSE	Bacteria--Bacteroidetes--Flavobacteriia--Flavobacteriales--Flavobacteriaceae--Epilithonimonas--OTU_OTU81	44	0.275615	53	Bacteria	OTU-OTU81	0	Bacteroidetes	Epilithonimonas	none	9	OTU_OTU81	Flavobacteriaceae	30	Flavobacteriia	Flavobacteriales
12793	OTU-OTU52		12793	OTU-OTU52	OTU-OTU52	FALSE	Bacteria--Proteobacteria--Betaproteobacteria--Burkholderiales--Oxalobacteraceae--Massilia--OTU_OTU52	43	0.314522	46	Bacteria	OTU-OTU52	0	Proteobacteria	Massilia	none	3	OTU_OTU52	Oxalobacteraceae	37	Betaproteobacteria	Burkholderiales
12791	OTU-OTU53		12791	OTU-OTU53	OTU-OTU53	FALSE	Bacteria--Proteobacteria--Gammaproteobacteria--Pseudomonadales--Moraxellaceae--Enhydrobacter--OTU_OTU53	19	0.379854	20	Bacteria	OTU-OTU53	0	Proteobacteria	Enhydrobacter	none	1	OTU_OTU53	Moraxellaceae	39	Gammaproteobacteria	Pseudomonadales
12789	OTU-OTU31		12789	OTU-OTU31	OTU-OTU31	FALSE	Bacteria--Actinobacteria--Actinobacteria1--Corynebacteriales--Mycobacteriaceae--Mycobacterium--OTU_OTU31	33	1.23388	36	Bacteria	OTU-OTU31	0	Actinobacteria	Mycobacterium	none	3	OTU_OTU31	Mycobacteriaceae	41	Actinobacteria	Corynebacteriales
12787	OTU-OTU110		12787	OTU-OTU110	OTU-OTU110	FALSE	Bacteria--Proteobacteria--Gammaproteobacteria--Enterobacteriales--Enterobacteriaceae--Escherichia-Shigella--OTU_OTU110	5	0.808455	49	Bacteria	OTU-OTU110	0	Proteobacteria	Escherichia-Shigella	none	44	OTU_OTU110	Enterobacteriaceae	44	Gammaproteobacteria	Enterobacteriales
12785	OTU-OTU111		12785	OTU-OTU111	OTU-OTU111	FALSE	Bacteria--Firmicutes--Bacilli--Lactobacillales--Streptococcaceae--Lactococcus--OTU_OTU111	13	0.111037	16	Bacteria	OTU-OTU111	0	Firmicutes	Lactococcus	none	3	OTU_OTU111	Streptococcaceae	24	Bacilli	Lactobacillales
12784	OTU-OTU104		12784	OTU-OTU104	OTU-OTU104	FALSE	Bacteria--Bacteroidetes--Sphingobacteriia--Sphingobacteriales--env.OPS 17--uncultured bacterium--uncultured bacteriumcross6--OTU_OTU104	18	0	22	Bacteria	OTU-OTU104	0	Bacteroidetes	uncultured bacterium	none	4	OTU_OTU104	env.OPS 17	0	Sphingobacteriia	Sphingobacteriales
12782	OTU-OTU10		12782	OTU-OTU10	OTU-OTU10	FALSE	Bacteria--Proteobacteria--Betaproteobacteria--Burkholderiales--Oxalobacteraceae--Duganella--OTU_OTU10	27	0.032821	30	Bacteria	OTU-OTU10	0	Proteobacteria	Duganella	none	3	OTU_OTU10	Oxalobacteraceae	24	Betaproteobacteria	Burkholderiales
12781	OTU-OTU96		12781	OTU-OTU96	OTU-OTU96	FALSE	Bacteria--Actinobacteria--Actinobacteria1--Micrococcales--Micrococcaceae--Arthrobacter--OTU_OTU96	21	0.096294	21	Bacteria	OTU-OTU96	0	Actinobacteria	Arthrobacter	none	0	OTU_OTU96	Micrococcaceae	30	Actinobacteria	Micrococcales
12779	OTU-OTU61		12779	OTU-OTU61	OTU-OTU61	FALSE	Bacteria--Bacteroidetes--Sphingobacteriia--Sphingobacteriales--Sphingobacteriaceae--Pedobacter--OTU_OTU61	55	0.356516	60	Bacteria	OTU-OTU61	0	Bacteroidetes	Pedobacter	none	5	OTU_OTU61	Sphingobacteriaceae	35	Sphingobacteriia	Sphingobacteriales
12777	OTU-OTU13		12777	OTU-OTU13	OTU-OTU13	FALSE	Bacteria--Proteobacteria--Gammaproteobacteria--Alteromonadales--Shewanellaceae--Shewanella--OTU_OTU13	6	0.119567	42	Bacteria	OTU-OTU13	0	Proteobacteria	Shewanella	none	36	OTU_OTU13	Shewanellaceae	40	Gammaproteobacteria	Alteromonadales
12775	OTU-OTU14		12775	OTU-OTU14	OTU-OTU14	FALSE	Bacteria--Proteobacteria--Gammaproteobacteria--Xanthomonadales--Xanthomonadaceae--Thermomonas--OTU_OTU14	39	0.027592	45	Bacteria	OTU-OTU14	0	Proteobacteria	Thermomonas	none	6	OTU_OTU14	Xanthomonadaceae	21	Gammaproteobacteria	Xanthomonadales
12773	OTU-OTU65		12773	OTU-OTU65	OTU-OTU65	FALSE	Bacteria--Proteobacteria--Deltaproteobacteria--Myxococcales--Polyangiaceae--Sorangium--OTU_OTU65	33	0.032667	38	Bacteria	OTU-OTU65	0	Proteobacteria	Sorangium	none	5	OTU_OTU65	Polyangiaceae	22	Deltaproteobacteria	Myxococcales
12772	OTU-OTU6		12772	OTU-OTU6	OTU-OTU6	FALSE	Bacteria--Bacteroidetes--Flavobacteriia--Flavobacteriales--Flavobacteriaceae--Flavobacterium--OTU_OTU6	34	0.779554	37	Bacteria	OTU-OTU6	0	Bacteroidetes	Flavobacterium	none	3	OTU_OTU6	Flavobacteriaceae	41	Flavobacteriia	Flavobacteriales
12770	OTU-OTU18		12770	OTU-OTU18	OTU-OTU18	FALSE	Bacteria--Proteobacteria--Alphaproteobacteria--Sphingomonadales--Sphingomonadaceae--Sphingopyxis--OTU_OTU18	42	0.024784	47	Bacteria	OTU-OTU18	0	Proteobacteria	Sphingopyxis	none	5	OTU_OTU18	Sphingomonadaceae	24	Alphaproteobacteria	Sphingomonadales
12769	OTU-OTU70		12769	OTU-OTU70	OTU-OTU70	FALSE	Bacteria--Proteobacteria--Gammaproteobacteria--Legionellales--Legionellaceae--Legionella--OTU_OTU70	27	0.111595	32	Bacteria	OTU-OTU70	0	Proteobacteria	Legionella	none	5	OTU_OTU70	Legionellaceae	33	Gammaproteobacteria	Legionellales
12767	OTU-OTU43		12767	OTU-OTU43	OTU-OTU43	FALSE	Bacteria--Proteobacteria--Alphaproteobacteria--Rhizobiales--Hyphomicrobiaceae--Devosia--OTU_OTU43	46	0.03365	53	Bacteria	OTU-OTU43	0	Proteobacteria	Devosia	none	7	OTU_OTU43	Hyphomicrobiaceae	28	Alphaproteobacteria	Rhizobiales
12766	OTU-OTU42		12766	OTU-OTU42	OTU-OTU42	FALSE	Bacteria--Proteobacteria--Alphaproteobacteria--Rhizobiales--Rhizobiaceae--Rhizobium--OTU_OTU42	38	0.133974	44	Bacteria	OTU-OTU42	0	Proteobacteria	Rhizobium	none	6	OTU_OTU42	Rhizobiaceae	35	Alphaproteobacteria	Rhizobiales

## Sheet: Links
Source	Target	Type	Id	Label	timeset	Weight	SUID	shared name	shared interaction	name	selected	interaction	pval	qval	nulldistribmedian	method_number	nulldistribmean	methodname_interactiontype	methodname_score	spearman_correlation	Score	randdistribMean	nulldistribsd	method_scores	randdistribMedian	interactionType	oriScore	randdistribNumNonNaNScores	randdistribSD	pval-brown-merge	methodname_pval	cooc_method
13611	12853	Undirected	0	OTU-OTU73->OTU-OTU20		0.43	13681	OTU-OTU73->OTU-OTU20		OTU-OTU73->OTU-OTU20	FALSE		0.002245	0.007815	[3.8456920861279036]	3	[4.038171172225852]	[dist_kullbackleibler=copresence, dist_bray=copresence, correl_spearman=copresence]	[dist_kullbackleibler=2.1305236942304946	correl_spearman	0.429515	[2.1313720146625394, 0.4716393267515923, 0.41326859492024504]	[0.9405340141896912]	[2.1305236942304946, 0.47491772482377237, 0.4295148838202753]	[2.064531957514023, 0.464370965520765, 0.4328743586695615]	copresence	[2.1305236942304946]	[100.0, 100.0, 100.0]	[0.39682460026392435, 0.057624678823493494, 0.133805391860945]	0.002245	[dist_kullbackleibler=0.0012351623948620993, dist_bray=0.29726027135678, correl_spearman=0.13530653988544628]	[dist_kullbackleibler, dist_bray, correl_spearman]
13611	12931	Undirected	1	OTU-OTU73->OTU-OTU28		0.32	13678	OTU-OTU73->OTU-OTU28		OTU-OTU73->OTU-OTU28	FALSE		0.016442	0.046539	[-0.005605173327492762]	3	[-0.005319446199335206]	[correl_spearman=mutualExclusion, dist_bray=mutualExclusion, dist_kullbackleibler=mutualExclusion]	[correl_spearman=-0.3229126682814123	[correl_spearman	-0.322913	[-0.3200243815169922, 0.7975661152550461, 9.868569456723337]	[0.14711220350455406]	[-0.3229126682814123, 0.8032007478129837, 10.030172039321522]	[-0.3290700163269755, 0.7990376589244566, 9.6250509072105]	mutualExclusion	[-0.3229126682814123]	[98.0, 98.0, 98.0]	[0.12825616229685194, 0.04842987029056952, 1.4684363833281922]	0.016442	[correl_spearman=0.1897689173022734, dist_bray=0.3119817662492036, dist_kullbackleibler=0.00877910980282548]	[correl_spearman, dist_bray, dist_kullbackleibler]
13611	12879	Undirected	2	OTU-OTU73->OTU-OTU58		0.32	13627	OTU-OTU73->OTU-OTU58		OTU-OTU73->OTU-OTU58	FALSE		0.014667	0.042118	[0.01669526988352206]	3	[0.020436431211463654]	[correl_spearman=mutualExclusion, dist_kullbackleibler=mutualExclusion, dist_bray=mutualExclusion]	[correl_spearman=-0.32097544397341565	[correl_spearman	-0.320975	[-0.30281267502315035, 11.580534872092418, 0.8099210385854696]	[0.13012618844814497]	[-0.32097544397341565, 12.169500222819776, 0.8278656768897703]	[-0.2971178915763128, 11.735411550033133, 0.8138499400635388]	mutualExclusion	[-0.32097544397341565]	[70.0, 70.0, 70.0]	[0.1345176990263361, 1.6542476654899394, 0.04646132550748817]	0.014667	[correl_spearman=0.18906463996611023, dist_kullbackleibler=0.006618024167549197, dist_bray=0.36140181937074534]	[correl_spearman, dist_kullbackleibler, dist_bray]
13611	12858	Undirected	3	OTU-OTU73->OTU-OTU64		0.45	13612	OTU-OTU73->OTU-OTU64		OTU-OTU73->OTU-OTU64	FALSE		0.001232	0.004554	[0.7187134879815398]	3	[0.7142720769045754]	[dist_bray=mutualExclusion, correl_spearman=mutualExclusion, dist_kullbackleibler=mutualExclusion]	[dist_bray=0.8264131220276607	correl_spearman	-0.45041	[0.8219542526216547, -0.4443141866606667, 11.441065557797701]	[0.05540188476465408]	[0.8264131220276607, -0.4504099875908942, 11.68052106561036]	[0.8263425399384052, -0.4415518865383095, 11.504789517139063]	mutualExclusion	[0.8264131220276607]	[100.0, 100.0, 100.0]	[0.04883720538763363, 0.11444854121172249, 1.9659245976532496]	0.001232	[dist_bray=0.31303400081348043, correl_spearman=0.0970349317545961, dist_kullbackleibler=8.2642960024637E-4]	[dist_bray, correl_spearman, dist_kullbackleibler]
13578	12801	Undirected	4	OTU-OTU94->OTU-OTU12		0.53	13672	OTU-OTU94->OTU-OTU12		OTU-OTU94->OTU-OTU12	FALSE		4.2e-05	0.000218	[0.02300428356021461]	3	[0.018561140264604443]	[correl_spearman=copresence, dist_bray=copresence, dist_kullbackleibler=copresence]	[correl_spearman=0.5344262010530226	[correl_spearman	0.534426	[0.5238460678210718, 0.5176332534026113, 4.786715139465217]	[0.14994748923231696]	[0.5344262010530226, 0.5205711352846387, 4.806782377815636]	[0.5359800750056456, 0.5151151374765515, 4.6669819073268215]	copresence	[0.5344262010530226]	[88.0, 88.0, 88.0]	[0.13362409772365197, 0.07791619266406304, 1.914530671407331]	4.2e-05	[correl_spearman=0.08344388508231732, dist_bray=0.1423383245268366, dist_kullbackleibler=5.12024962664448E-5]	[correl_spearman, dist_bray, dist_kullbackleibler]
13578	13066	Undirected	5	OTU-OTU94->OTU-OTU41		0.28	13625	OTU-OTU94->OTU-OTU41		OTU-OTU94->OTU-OTU41	FALSE		0	0	[10.980817474805269]	3	[11.364449106229713]	[dist_kullbackleibler=copresence, dist_bray=copresence, correl_spearman=copresence]	[dist_kullbackleibler=3.99150591532648	correl_spearman	0.281046	[3.9967799646556648, 0.5044876206259561, 0.2846021984973308]	[2.6086057816228623]	[3.99150591532648, 0.502179221912844, 0.2810463423686563]	[3.83584489276409, 0.5220726881160261, 0.31765714467450534]	copresence	[3.99150591532648]	[100.0, 100.0, 100.0]	[1.580712491046791, 0.13479520192552324, 0.15126208884123163]	0	[dist_kullbackleibler=2.3131971893519676E-9, dist_bray=0.18565326455476083, correl_spearman=0.25911706044697935]	[dist_kullbackleibler, dist_bray, correl_spearman]
13578	12791	Undirected	6	OTU-OTU94->OTU-OTU53		0.59	13607	OTU-OTU94->OTU-OTU53		OTU-OTU94->OTU-OTU53	FALSE		0	0	[0.015301311474957908]	3	[-0.005591473732370511]	[correl_spearman=copresence, dist_bray=copresence, dist_kullbackleibler=copresence]	[correl_spearman=0.5948448099305577	[correl_spearman	0.594845	[0.588603465996896, 0.4470155036590567, 2.7781736279823654]	[0.14570609233962892]	[0.5948448099305577, 0.4587661453090057, 2.8037714865883725]	[0.6001588326873367, 0.4430035328399419, 2.5670661952098044]	copresence	[0.5948448099305577]	[100.0, 100.0, 100.0]	[0.10553303159594576, 0.07076941258559989, 0.8706361279346091]	0	[correl_spearman=0.033693168570086085, dist_bray=0.09473723068370987, dist_kullbackleibler=2.0500423580926963E-10]	[correl_spearman, dist_bray, dist_kullbackleibler]
13578	13364	Undirected	7	OTU-OTU94->OTU-OTU57		0.09	13602	OTU-OTU94->OTU-OTU57		OTU-OTU94->OTU-OTU57	FALSE		0.006789	0.021174	[0.8741346538055368]	3	[0.8586152021240914]	[dist_bray=mutualExclusion, dist_kullbackleibler=mutualExclusion, correl_spearman=mutualExclusion]	[dist_bray=0.9306237964712852	correl_spearman	-0.0853626	[0.9109979070835328, 16.432376477965633, -0.06979885651732347]	[0.07736928255314987]	[0.9306237964712852, 18.082652973846347, -0.08536264659942074]	[0.917579181742417, 16.74441109207921, -0.06305210943876753]	mutualExclusion	[0.9306237964712852]	[56.0, 56.0, 56.0]	[0.039713663160119976, 2.554743092223732, 0.160367207975802]	0.006789	[dist_bray=0.39633077327827393, dist_kullbackleibler=9.91579343199045E-4, correl_spearman=0.45733560266451834]	[dist_bray, dist_kullbackleibler, correl_spearman]
13578	12814	Undirected	8	OTU-OTU94->OTU-OTU108		0.31	13579	OTU-OTU94->OTU-OTU108		OTU-OTU94->OTU-OTU108	FALSE		0.004307	0.01411	[0.7950686588733469]	3	[0.7907664108255479]	[dist_bray=copresence, dist_kullbackleibler=copresence, correl_spearman=copresence]	[dist_bray=0.6310353141250293	correl_spearman	0.306467	[0.6173237465330473, 5.537207410338751, 0.319669039160007]	[0.056173624255056294]	[0.6310353141250293, 5.699744466031491, 0.30646712106604557]	[0.6108504658534284, 5.3967439720335975, 0.30452706560219167]	copresence	[0.6310353141250293]	[100.0, 100.0, 100.0]	[0.08849259393891004, 1.673786782412085, 0.13444548317465496]	0.004307	[dist_bray=0.2799313237729004, dist_kullbackleibler=0.0020891827015587783, correl_spearman=0.18021513996295296]	[dist_bray, dist_kullbackleibler, correl_spearman]
13364	12969	Undirected	9	OTU-OTU57->OTU-OTU24		0.35	14039	OTU-OTU57->OTU-OTU24		OTU-OTU57->OTU-OTU24	FALSE		0.000386	0.001613	[8.830015377339233]	3	[9.266667788399584]	[dist_kullbackleibler=mutualExclusion, correl_spearman=mutualExclusion, dist_bray=mutualExclusion]	[dist_kullbackleibler=16.644191954732545	correl_spearman	-0.35078	[15.076601529356209, -0.3280739523300053, 0.8889113935333628]	[2.324093003683324]	[16.644191954732545, -0.3507796772841752, 0.9106964777943086]	[15.565157792524726, -0.3451891318245083, 0.888497389675234]	mutualExclusion	[16.644191954732545]	[56.0, 56.0, 56.0]	[2.4309174245250924, 0.13465524051849095, 0.03357260491907243]	0.000386	[dist_kullbackleibler=9.712825946106562E-5, correl_spearman=0.20674984942350638, dist_bray=0.3417681510954449]	[dist_kullbackleibler, correl_spearman, dist_bray]
13364	12895	Undirected	10	OTU-OTU57->OTU-OTU25		0.25	14037	OTU-OTU57->OTU-OTU25		OTU-OTU57->OTU-OTU25	FALSE		0.006782	0.02117	[0.014347925898962131]	3	[0.010436460561583533]	[correl_spearman=mutualExclusion, dist_kullbackleibler=mutualExclusion, dist_bray=mutualExclusion]	[correl_spearman=-0.24943317332041862	[correl_spearman	-0.249433	[-0.255498770748469, 14.327603721155718, 0.9086384799744149]	[0.1591256450517793]	[-0.24943317332041862, 15.275675893531227, 0.9252088489777511]	[-0.255847187466194, 14.577740745770965, 0.91444873061185]	mutualExclusion	[-0.24943317332041862]	[52.0, 52.0, 52.0]	[0.13916177691760953, 1.7235828656906795, 0.03398012268410859]	0.006782	[correl_spearman=0.2379602805955512, dist_kullbackleibler=0.0022878587854019417, dist_bray=0.3297146450255928]	[correl_spearman, dist_kullbackleibler, dist_bray]
13364	12917	Undirected	11	OTU-OTU57->OTU-OTU30		0.27	14028	OTU-OTU57->OTU-OTU30		OTU-OTU57->OTU-OTU30	FALSE		0	0	[0.8566119723868078]	3	[0.833295586662509]	[dist_bray=copresence, dist_kullbackleibler=copresence, correl_spearman=copresence]	[dist_bray=0.4271323450619492	correl_spearman	0.271824	[0.4773623599500578, 3.2272949072413133, 0.29606315573658776]	[0.08767382181334489]	[0.4271323450619492, 3.017010845437377, 0.27182353367235484]	[0.4711528171962617, 2.9982912767601073, 0.2993026408517915]	copresence	[0.4271323450619492]	[56.0, 56.0, 56.0]	[0.13381075337212678, 1.185751759123507, 0.14167269051767034]	0	[dist_bray=0.1652709813878488, dist_kullbackleibler=6.7701400041642046E-12, correl_spearman=0.21718561330070346]	[dist_bray, dist_kullbackleibler, correl_spearman]
13364	12922	Undirected	12	OTU-OTU57->OTU-OTU44		0.21	14015	OTU-OTU57->OTU-OTU44		OTU-OTU57->OTU-OTU44	FALSE		0.009017	0.027301	[9.909660532241153]	3	[10.065746386541356]	[dist_kullbackleibler=mutualExclusion, correl_spearman=mutualExclusion, dist_bray=mutualExclusion]	[dist_kullbackleibler=14.99253528599678	correl_spearman	-0.209995	[13.885074460220634, -0.200814875063183, 0.865424154022743]	[2.4018875298927984]	[14.99253528599678, -0.2099947718750663, 0.8862176675584916]	[14.35370104843587, -0.18653731808031238, 0.8704247326972554]	mutualExclusion	[14.99253528599678]	[52.0, 52.0, 52.0]	[1.8162984413208898, 0.12820182052834964, 0.04047163253055403]	0.009017	[dist_kullbackleibler=0.0022987710312228904, correl_spearman=0.2829476055360274, dist_bray=0.38704153192964597]	[dist_kullbackleibler, correl_spearman, dist_bray]
13364	12884	Undirected	13	OTU-OTU57->OTU-OTU55		0.13	14000	OTU-OTU57->OTU-OTU55		OTU-OTU57->OTU-OTU55	FALSE		0.015279	0.043732	[0.8908691238436125]	3	[0.8821227829265532]	[dist_bray=mutualExclusion, correl_spearman=mutualExclusion, dist_kullbackleibler=mutualExclusion]	[dist_bray=0.9488154764296791	correl_spearman	-0.125412	[0.9311087492656437, -0.13807738481083223, 17.23642709627018]	[0.06596713099243451]	[0.9488154764296791, -0.12541230909404105, 18.797842152591272]	[0.9444165458740538, -0.1616087817429987, 17.583572123264677]	mutualExclusion	[0.9488154764296791]	[50.0, 50.0, 50.0]	[0.040916180186988296, 0.14500346121694857, 2.38148288028897]	0.015279	[dist_bray=0.40432339969664266, correl_spearman=0.3609855757241105, dist_kullbackleibler=0.0032561860897649675]	[dist_bray, correl_spearman, dist_kullbackleibler]
13364	12862	Undirected	14	OTU-OTU57->OTU-OTU112		0.22	13795	OTU-OTU57->OTU-OTU112		OTU-OTU57->OTU-OTU112	FALSE		0.005206	0.016667	[0.8110659880477854]	3	[0.8097404649548277]	[dist_bray=mutualExclusion, correl_spearman=mutualExclusion, dist_kullbackleibler=mutualExclusion]	[dist_bray=0.9139691582834245	correl_spearman	-0.218272	[0.8930982885266864, -0.21451936190485574, 14.663315837861452]	[0.06833450941988044]	[0.9139691582834245, -0.2182720791784396, 15.973274334902541]	[0.8966818156974966, -0.21501174255920608, 15.0359496675034]	mutualExclusion	[0.9139691582834245]	[56.0, 56.0, 56.0]	[0.040378874957626126, 0.14745474548511875, 2.1699459140817585]	0.005206	[dist_bray=0.33913349172812446, correl_spearman=0.2670700921541087, dist_kullbackleibler=0.001452182323997575]	[dist_bray, correl_spearman, dist_kullbackleibler]
13229	12824	Undirected	15	OTU-OTU47->OTU-OTU85		0.2	14083	OTU-OTU47->OTU-OTU85		OTU-OTU47->OTU-OTU85	FALSE		0.017255	0.048558	[8.463228733279694]	3	[8.492003390763136]	[dist_kullbackleibler=mutualExclusion, correl_spearman=mutualExclusion, dist_bray=mutualExclusion]	[dist_kullbackleibler=12.677206218958876	correl_spearman	-0.204515	[12.127941892270105, -0.212228859276565, 0.8363906478546099]	[1.7184114044518852]	[12.677206218958876, -0.20451525083914124, 0.8488711469155552]	[12.333179927831187, -0.23085813031944807, 0.8449334962349695]	mutualExclusion	[12.677206218958876]	[76.0, 76.0, 76.0]	[1.9868314440764039, 0.15780506625184385, 0.051721414058455865]	0.017255	[dist_kullbackleibler=0.004947131716685926, correl_spearman=0.31750538993927335, dist_bray=0.3510214083594714]	[dist_kullbackleibler, correl_spearman, dist_bray]
13191	12777	Undirected	16	OTU-OTU90->OTU-OTU13		0.34	13878	OTU-OTU90->OTU-OTU13		OTU-OTU90->OTU-OTU13	FALSE		0.003643	0.012185	[5.642507610185563]	3	[5.801245015257827]	[dist_kullbackleibler=copresence, correl_spearman=copresence, dist_bray=copresence]	[dist_kullbackleibler=2.925857508575175	correl_spearman	0.336367	[3.036348091091982, 0.3094906215085005, 0.46881508235956815]	[1.654228369837378]	[2.925857508575175, 0.3363666519786174, 0.48711007729557576]	[2.9102632783045617, 0.3144813747875741, 0.4725165081120146]	copresence	[2.925857508575175]	[100.0, 100.0, 100.0]	[0.9649659695215207, 0.15183977303253549, 0.05955861680781441]	0.003643	[dist_kullbackleibler=0.002441590643103564, correl_spearman=0.23458167689433845, dist_bray=0.15148478413773314]	[dist_kullbackleibler, correl_spearman, dist_bray]
13191	12917	Undirected	17	OTU-OTU90->OTU-OTU30		0.33	13869	OTU-OTU90->OTU-OTU30		OTU-OTU90->OTU-OTU30	FALSE		1.3e-05	7.4e-05	[6.822405669336585]	3	[7.348655361033332]	[dist_kullbackleibler=copresence, correl_spearman=copresence, dist_bray=copresence]	[dist_kullbackleibler=2.3618524008290507	correl_spearman	0.3346	[2.6773582269500724, 0.3392640884785238, 0.44346402698313875]	[2.1318710870030846]	[2.3618524008290507, 0.33460031643044025, 0.396852157570442]	[2.4657545743094627, 0.36083398776984577, 0.42431412822966885]	copresence	[2.3618524008290507]	[100.0, 100.0, 100.0]	[1.106614974241744, 0.15719292211598232, 0.1373301033419095]	1.3e-05	[dist_kullbackleibler=4.485938861042982E-6, correl_spearman=0.20409246784723567, dist_bray=0.18835356284657645]	[dist_kullbackleibler, correl_spearman, dist_bray]
13191	13364	Undirected	18	OTU-OTU90->OTU-OTU57		0.5	13854	OTU-OTU90->OTU-OTU57		OTU-OTU90->OTU-OTU57	FALSE		0	3e-06	[9.747913017743187]	3	[9.273630710292727]	[dist_kullbackleibler=copresence, dist_bray=copresence, correl_spearman=copresence]	[dist_kullbackleibler=2.938615124815533	correl_spearman	0.501375	[3.1461375309946735, 0.4194053666269113, 0.4933475055380588]	[2.186657249327328]	[2.938615124815533, 0.3812095189476421, 0.5013748199160492]	[2.790438931678261, 0.39003002748855486, 0.501463179872427]	copresence	[2.938615124815533]	[56.0, 56.0, 56.0]	[1.524991527819647, 0.13681357391447793, 0.12026436928105383]	0	[dist_kullbackleibler=3.490118065663239E-7, dist_bray=0.13849945338585334, correl_spearman=0.07547482288018498]	[dist_kullbackleibler, dist_bray, correl_spearman]
13191	12787	Undirected	20	OTU-OTU90->OTU-OTU110		0.28	13192	OTU-OTU90->OTU-OTU110		OTU-OTU90->OTU-OTU110	FALSE		0.000615	0.00243	[0.02797364237512619]	3	[0.0058128503979031345]	[correl_spearman=copresence, dist_kullbackleibler=copresence, dist_bray=copresence]	[correl_spearman=0.2797364237512619	[correl_spearman	0.279736	[0.2579424174917452, 2.610545266915626, 0.4810050054902111]	[0.14538226199604418]	[0.2797364237512619, 2.4930442727113724, 0.5032362639989284]	[0.28491279574590533, 2.4591539945900607, 0.4792998383731288]	copresence	[0.2797364237512619]	[100.0, 100.0, 100.0]	[0.14032334847718156, 0.7126270803987805, 0.054325702164230105]	0.000615	[correl_spearman=0.25045208190259294, dist_kullbackleibler=3.2706269847904146E-4, dist_bray=0.1406435804668119]	[correl_spearman, dist_kullbackleibler, dist_bray]
13177	12766	Undirected	21	OTU-OTU51->OTU-OTU42		0.35	13421	OTU-OTU51->OTU-OTU42		OTU-OTU51->OTU-OTU42	FALSE		0.000475	0.001927	[8.234173230504316]	3	[8.506313917098394]	[dist_kullbackleibler=copresence, dist_bray=copresence, correl_spearman=copresence]	[dist_kullbackleibler=4.857665118997956	correl_spearman	0.352876	[4.71193512183262, 0.5801674816300574, 0.34994588004570176]	[1.8230279341579272]	[4.857665118997956, 0.5965725553050545, 0.35287551476399726]	[4.591957754634668, 0.5708453559566369, 0.3416990820765946]	copresence	[4.857665118997956]	[78.0, 78.0, 78.0]	[1.1482089904222343, 0.06071355770958809, 0.13155551911022875]	0.000475	[dist_kullbackleibler=1.9928039104477602E-4, dist_bray=0.27454814926638393, correl_spearman=0.15780774693226995]	[dist_kullbackleibler, dist_bray, correl_spearman]
13177	12835	Undirected	22	OTU-OTU51->OTU-OTU79		0.5	13373	OTU-OTU51->OTU-OTU79		OTU-OTU51->OTU-OTU79	FALSE		4e-06	2.3e-05	[9.675088225828954]	3	[9.80474830821552]	[dist_kullbackleibler=copresence, correl_spearman=copresence, dist_bray=copresence]	[dist_kullbackleibler=4.924674025730945	correl_spearman	0.495015	[4.7833527650861525, 0.4864432309000517, 0.5864569189017688]	[2.114844631464267]	[4.924674025730945, 0.49501466275659806, 0.6049365714875565]	[4.773930360319038, 0.49683936644250626, 0.5876554234272102]	copresence	[4.924674025730945]	[64.0, 64.0, 64.0]	[1.1946491147997775, 0.11447717213203355, 0.07900480341347449]	4e-06	[dist_kullbackleibler=2.1726852428294308E-6, correl_spearman=0.08541432788482489, dist_bray=0.24465677411799014]	[dist_kullbackleibler, correl_spearman, dist_bray]
13177	12896	Undirected	25	OTU-OTU51->OTU-OTU1		0.37	13178	OTU-OTU51->OTU-OTU1		OTU-OTU51->OTU-OTU1	FALSE		2.6e-05	0.000141	[0.032649107713231276]	3	[0.03136886261427919]	[correl_spearman=copresence, dist_kullbackleibler=copresence, dist_bray=copresence]	[correl_spearman=0.3693564264275836	[correl_spearman	0.369356	[0.3792664131569968, 5.063894936968601, 0.6256742473275531]	[0.1577471960730673]	[0.3693564264275836, 5.115297911220359, 0.6424682090912355]	[0.3810473034455768, 4.9758662060870975, 0.628400539129246]	copresence	[0.3693564264275836]	[76.0, 76.0, 76.0]	[0.1464427127029769, 1.3060221176854798, 0.07663320459540003]	2.6e-05	[correl_spearman=0.18164545029897777, dist_kullbackleibler=6.860706573519337E-6, dist_bray=0.29557470937786756]	[correl_spearman, dist_kullbackleibler, dist_bray]
13169	12853	Undirected	26	OTU-OTU91->OTU-OTU20		0.41	14085	OTU-OTU91->OTU-OTU20		OTU-OTU91->OTU-OTU20	FALSE		3.9e-05	0.000207	[0.6756764965433928]	3	[0.6675157021850998]	[dist_bray=copresence, correl_spearman=copresence, dist_kullbackleibler=copresence]	[dist_bray=0.43473459607120224	correl_spearman	0.407083	[0.4259839869356549, 0.39803910586931956, 2.3312941525769997]	[0.04875058932696999]	[0.43473459607120224, 0.4070827651173885, 2.3596216448859235]	[0.41913955381049034, 0.3995378539583352, 2.315306138558352]	copresence	[0.43473459607120224]	[100.0, 100.0, 100.0]	[0.060523034776306155, 0.1366025214466899, 0.5631150361388356]	3.9e-05	[dist_bray=0.16310432407180608, correl_spearman=0.14611910075713935, dist_kullbackleibler=2.4072613713843616E-5]	[dist_bray, correl_spearman, dist_kullbackleibler]
13169	12793	Undirected	27	OTU-OTU91->OTU-OTU52		0.32	14065	OTU-OTU91->OTU-OTU52		OTU-OTU91->OTU-OTU52	FALSE		0.007673	0.023618	[6.597668350633152]	3	[6.681930586842993]	[dist_kullbackleibler=copresence, dist_bray=copresence, correl_spearman=copresence]	[dist_kullbackleibler=4.11767203892031	correl_spearman	0.320437	[4.019970449372029, 0.5815148024338834, 0.3156818526042041]	[1.5466500339819467]	[4.11767203892031, 0.585865974476768, 0.32043658924375706]	[4.00995147708585, 0.5987724982939551, 0.3111812966800422]	copresence	[4.11767203892031]	[100.0, 100.0, 100.0]	[0.9114671051108186, 0.07945587077385001, 0.13992198966969793]	0.007673	[dist_kullbackleibler=0.00264971638441569, dist_bray=0.38419606810524953, correl_spearman=0.20409307132830062]	[dist_kullbackleibler, dist_bray, correl_spearman]
13169	13364	Undirected	28	OTU-OTU91->OTU-OTU57		0.28	14062	OTU-OTU91->OTU-OTU57		OTU-OTU91->OTU-OTU57	FALSE		3e-06	2.2e-05	[10.311386394489759]	3	[10.121114570896303]	[dist_kullbackleibler=copresence, dist_bray=copresence, correl_spearman=copresence]	[dist_kullbackleibler=4.2608222923953605	correl_spearman	0.282791	[4.44609441830876, 0.586917224486516, 0.28123668124171586]	[2.2688759320391236]	[4.2608222923953605, 0.5981912648397012, 0.2827909491923431]	[4.265608708655014, 0.5920645782362658, 0.2839809115680738]	copresence	[4.2608222923953605]	[56.0, 56.0, 56.0]	[1.4044364780887602, 0.07851014143278184, 0.16195979868457389]	3e-06	[dist_kullbackleibler=8.393847478194161E-7, dist_bray=0.2100863626557503, correl_spearman=0.23327675807505033]	[dist_kullbackleibler, dist_bray, correl_spearman]
13128	12861	Undirected	29	OTU-OTU102->OTU-OTU4		0.59	14041	OTU-OTU102->OTU-OTU4		OTU-OTU102->OTU-OTU4	FALSE		0.000275	0.001202	[6.196610276496754]	3	[6.375382239779107]	[dist_kullbackleibler=copresence, dist_bray=copresence, correl_spearman=copresence]	[dist_kullbackleibler=2.9566459206363715	correl_spearman	0.593432	[2.891252891690726, 0.5025673808997365, 0.5887691547751635]	[1.2768083659531553]	[2.9566459206363715, 0.5118648095575828, 0.5934316807059467]	[2.7709367034234225, 0.49629008530612023, 0.6089011117521042]	copresence	[2.9566459206363715]	[100.0, 100.0, 100.0]	[1.151288482408076, 0.0754823972435329, 0.10984059988386849]	0.000275	[dist_kullbackleibler=5.828371546929834E-4, dist_bray=0.2611397763845653, correl_spearman=0.031098616550856717]	[dist_kullbackleibler, dist_bray, correl_spearman]
13128	12772	Undirected	30	OTU-OTU102->OTU-OTU6		0.7	14040	OTU-OTU102->OTU-OTU6		OTU-OTU102->OTU-OTU6	FALSE		0	0	[-0.004229180684315385]	3	[-0.009885709849587216]	[correl_spearman=copresence, dist_kullbackleibler=copresence, dist_bray=copresence]	[correl_spearman=0.6952376559325338	[correl_spearman	0.695238	[0.6873932861569017, 1.6446798886767704, 0.4861900229644154]	[0.14784592940588687]	[0.6952376559325338, 1.7649649377419745, 0.506958282873609]	[0.6872523396154517, 1.6717610849522475, 0.49294902873658936]	copresence	[0.6952376559325338]	[100.0, 100.0, 100.0]	[0.08221019257498939, 0.3664071279286807, 0.061054027587433835]	0	[correl_spearman=0.007510154570181338, dist_kullbackleibler=1.9324374322948756E-8, dist_bray=0.28967958152899076]	[correl_spearman, dist_kullbackleibler, dist_bray]
13128	13011	Undirected	31	OTU-OTU102->OTU-OTU7		0.46	14038	OTU-OTU102->OTU-OTU7		OTU-OTU102->OTU-OTU7	FALSE		0.000271	0.001183	[0.7425313449491717]	3	[0.7290109029417055]	[dist_bray=copresence, dist_kullbackleibler=copresence, correl_spearman=copresence]	[dist_bray=0.5958152039401793	correl_spearman	0.45733	[0.5919968066212605, 4.187491941870641, 0.44072233481035844]	[0.06041496819557683]	[0.5958152039401793, 4.358157337239194, 0.45732958101346705]	[0.5886162496158546, 4.155746968460469, 0.4529716100279979]	copresence	[0.5958152039401793]	[92.0, 92.0, 92.0]	[0.08213556186180228, 1.0827828117234735, 0.13058698981828903]	0.000271	[dist_bray=0.3162970019501852, dist_kullbackleibler=1.1953017062293902E-4, correl_spearman=0.12275804965304321]	[dist_bray, dist_kullbackleibler, correl_spearman]
13128	12782	Undirected	32	OTU-OTU102->OTU-OTU10		0.56	14023	OTU-OTU102->OTU-OTU10		OTU-OTU102->OTU-OTU10	FALSE		3e-05	0.00016	[7.340272448408817]	3	[7.439282113571719]	[dist_kullbackleibler=copresence, dist_bray=copresence, correl_spearman=copresence]	[dist_kullbackleibler=3.68337769287103	correl_spearman	0.558903	[3.424956170806911, 0.539350338861881, 0.5609232924144344]	[1.2732494292963719]	[3.68337769287103, 0.5524341363361998, 0.5589027410446534]	[3.2859006963528814, 0.5428830482264573, 0.5631671325365265]	copresence	[3.68337769287103]	[86.0, 86.0, 86.0]	[0.9981326896238986, 0.06415122025639464, 0.11005162555951424]	3e-05	[dist_kullbackleibler=2.9337239223825584E-5, dist_bray=0.2952604690008409, correl_spearman=0.04900827540928765]	[dist_kullbackleibler, dist_bray, correl_spearman]
13128	12801	Undirected	33	OTU-OTU102->OTU-OTU12		0.28	14022	OTU-OTU102->OTU-OTU12		OTU-OTU102->OTU-OTU12	FALSE		0.002362	0.008188	[7.424107783003674]	3	[7.267526480799185]	[dist_kullbackleibler=copresence, dist_bray=copresence, correl_spearman=copresence]	[dist_kullbackleibler=4.214889247588671	correl_spearman	0.277843	[4.165135997823712, 0.5844883884074438, 0.2619408128647475]	[1.3417836415075528]	[4.214889247588671, 0.5854008263717871, 0.2778433810072012]	[4.100007032652961, 0.5940422071465131, 0.2439235396340525]	copresence	[4.214889247588671]	[88.0, 88.0, 88.0]	[0.9226239342830551, 0.07145067752168242, 0.14697289092469273]	0.002362	[dist_kullbackleibler=6.192477494060267E-4, dist_bray=0.3616686971444092, correl_spearman=0.2350470454484721]	[dist_kullbackleibler, dist_bray, correl_spearman]
13128	12777	Undirected	34	OTU-OTU102->OTU-OTU13		0.5	14021	OTU-OTU102->OTU-OTU13		OTU-OTU102->OTU-OTU13	FALSE		0.00116	0.004326	[5.0574378405986735]	3	[5.109858793855762]	[dist_kullbackleibler=mutualExclusion, dist_bray=mutualExclusion, correl_spearman=mutualExclusion]	[dist_kullbackleibler=9.26934099218934	correl_spearman	-0.503372	[8.836678931724157, 0.7553377815567239, -0.4933514844249297]	[1.2404716626160581]	[9.26934099218934, 0.7656780864160115, -0.5033723583036942]	[8.885431283610998, 0.7563164719775193, -0.49695689407316496]	mutualExclusion	[9.26934099218934]	[100.0, 100.0, 100.0]	[1.492677723524694, 0.051331365451397874, 0.11146288727807259]	0.00116	[dist_kullbackleibler=0.0011427208585201853, dist_bray=0.2892947085508616, correl_spearman=0.07098175310943367]	[dist_kullbackleibler, dist_bray, correl_spearman]
13128	12875	Undirected	36	OTU-OTU102->OTU-OTU16		0.69	14019	OTU-OTU102->OTU-OTU16		OTU-OTU102->OTU-OTU16	FALSE		2e-06	1.1e-05	[-0.00219803944013682]	3	[-0.0035766223014976318]	[correl_spearman=copresence, dist_kullbackleibler=copresence, dist_bray=copresence]	[correl_spearman=0.6879863447628246	[correl_spearman	0.687986	[0.6776772898748856, 3.3837339398146615, 0.5541840205286217]	[0.1323134012107891]	[0.6879863447628246, 3.564512970277298, 0.5758347789781127]	[0.6845370530479595, 3.344967850587647, 0.5665649427813509]	copresence	[0.6879863447628246]	[96.0, 96.0, 96.0]	[0.09530955384040964, 1.0922433452708282, 0.07759947696900774]	2e-06	[correl_spearman=0.013667957364468242, dist_kullbackleibler=5.155931234401834E-6, dist_bray=0.27536794845556545]	[correl_spearman, dist_kullbackleibler, dist_bray]
13128	12770	Undirected	37	OTU-OTU102->OTU-OTU18		0.63	14016	OTU-OTU102->OTU-OTU18		OTU-OTU102->OTU-OTU18	FALSE		2.6e-05	0.000143	[-0.00940796384551474]	3	[-0.01089790656415996]	[correl_spearman=copresence, dist_bray=copresence, dist_kullbackleibler=copresence]	[correl_spearman=0.6252463083108019	[correl_spearman	0.625246	[0.6108139164346458, 0.4910869816760137, 3.4908022461024544]	[0.15290476883475124]	[0.6252463083108019, 0.5002313514384182, 3.6798187011128527]	[0.6120842848935306, 0.48784948659146943, 3.460722401734106]	copresence	[0.6252463083108019]	[80.0, 80.0, 80.0]	[0.11294188998277681, 0.07449519462821202, 1.071280939346698]	2.6e-05	[correl_spearman=0.032159883843393744, dist_bray=0.21950097883220177, dist_kullbackleibler=5.290597549534315E-5]	[correl_spearman, dist_bray, dist_kullbackleibler]
13128	12808	Undirected	38	OTU-OTU102->OTU-OTU21		0.56	14008	OTU-OTU102->OTU-OTU21		OTU-OTU102->OTU-OTU21	FALSE		0.000188	0.00085	[0.005956766382550752]	3	[0.0019075709689961944]	[correl_spearman=copresence, dist_bray=copresence, dist_kullbackleibler=copresence]	[correl_spearman=0.561271480210726	[correl_spearman	0.561271	[0.5638171045457033, 0.5008590173679519, 4.0776992616397925]	[0.15397457411818202]	[0.561271480210726, 0.505861656072556, 4.375729567756296]	[0.5836942035907347, 0.49897991638835154, 4.100684492357368]	copresence	[0.561271480210726]	[72.0, 72.0, 72.0]	[0.1247753392770797, 0.07971282493124869, 1.214987952796648]	0.000188	[correl_spearman=0.055832888078799825, dist_bray=0.2355683585315912, dist_kullbackleibler=2.3655289931867607E-4]	[correl_spearman, dist_bray, dist_kullbackleibler]
13128	12806	Undirected	39	OTU-OTU102->OTU-OTU22		0.65	14006	OTU-OTU102->OTU-OTU22		OTU-OTU102->OTU-OTU22	FALSE		0	0	[0.0012698919920959735]	3	[0.009439288590391092]	[correl_spearman=copresence, dist_kullbackleibler=copresence, dist_bray=copresence]	[correl_spearman=0.6549740068947576	[correl_spearman	0.654974	[0.6648286467286432, 2.7053687073096553, 0.37449115748788325]	[0.14611219864182837]	[0.6549740068947576, 3.037709074312842, 0.39261848803182453]	[0.6636729685666439, 2.638722165225041, 0.3750434580255644]	copresence	[0.6549740068947576]	[6.0, 6.0, 6.0]	[0.1038045173511016, 0.9433590216400469, 0.07411685520260432]	0	[correl_spearman=0.02096628174679538, dist_kullbackleibler=1.9615021384922215E-8, dist_bray=0.10340961653374148]	[correl_spearman, dist_kullbackleibler, dist_bray]
13128	12847	Undirected	41	OTU-OTU102->OTU-OTU27		0.4	14003	OTU-OTU102->OTU-OTU27		OTU-OTU102->OTU-OTU27	FALSE		0.014898	0.042713	[0.6686520715292719]	3	[0.6584143251620936]	[dist_bray=copresence, correl_spearman=copresence, dist_kullbackleibler=copresence]	[dist_bray=0.5684090115870062	correl_spearman	0.404832	[0.5609751582225022, 0.3939427360022186, 4.6819316461932035]	[0.05975715365023346]	[0.5684090115870062, 0.40483197766728335, 4.893909934693849]	[0.5627513819870952, 0.41868361045115005, 4.666005620610301]	copresence	[0.5684090115870062]	[92.0, 92.0, 92.0]	[0.07941168128180667, 0.13801863167762604, 1.2597138268271801]	0.014898	[dist_bray=0.36475657250221916, correl_spearman=0.14780178850228498, dist_kullbackleibler=0.008549043096482078]	[dist_bray, correl_spearman, dist_kullbackleibler]
13128	12844	Undirected	42	OTU-OTU102->OTU-OTU29		0.45	14001	OTU-OTU102->OTU-OTU29		OTU-OTU102->OTU-OTU29	FALSE		0.001634	0.005862	[7.687157192913094]	3	[7.914880181087767]	[dist_kullbackleibler=copresence, dist_bray=copresence, correl_spearman=copresence]	[dist_kullbackleibler=4.811129545938547	correl_spearman	0.447958	[4.476159149412186, 0.6115144808548827, 0.44931878668928565]	[1.7175633343487362]	[4.811129545938547, 0.6372125941633171, 0.4479584562886574]	[4.3753760582436385, 0.6319150208928437, 0.46171015195420484]	copresence	[4.811129545938547]	[88.0, 88.0, 88.0]	[1.1771374247542896, 0.09886894027954561, 0.13790754662398022]	0.001634	[dist_kullbackleibler=7.636490937812379E-4, dist_bray=0.3706510881064624, correl_spearman=0.12215581394275848]	[dist_kullbackleibler, dist_bray, correl_spearman]
13128	12833	Undirected	43	OTU-OTU102->OTU-OTU36		0.67	13988	OTU-OTU102->OTU-OTU36		OTU-OTU102->OTU-OTU36	FALSE		0	0	[-0.009221332105497748]	3	[-0.013185513369775161]	[correl_spearman=copresence, dist_kullbackleibler=copresence, dist_bray=copresence]	[correl_spearman=0.6653901718562031	[correl_spearman	0.66539	[0.656518869076389, 1.5095602302507891, 0.4446093510077818]	[0.14552432888564318]	[0.6653901718562031, 1.5210681697968518, 0.4529851901022821]	[0.661572607040221, 1.4844236826881492, 0.44674269541689426]	copresence	[0.6653901718562031]	[100.0, 100.0, 100.0]	[0.07231537256459449, 0.2821997503772035, 0.04736176231128678]	0	[correl_spearman=0.006380101747550715, dist_kullbackleibler=1.9352430769004059E-10, dist_bray=0.22602357181555388]	[correl_spearman, dist_kullbackleibler, dist_bray]
13128	12830	Undirected	44	OTU-OTU102->OTU-OTU38		0.59	13987	OTU-OTU102->OTU-OTU38		OTU-OTU102->OTU-OTU38	FALSE		2e-06	1.5e-05	[0.5556100688822896]	3	[0.5549965816396505]	[dist_bray=copresence, dist_kullbackleibler=copresence, correl_spearman=copresence]	[dist_bray=0.4048160161125004	correl_spearman	0.593013	[0.39211425488274876, 1.3136003889446297, 0.6096684511764252]	[0.043262700552282075]	[0.4048160161125004, 1.3847163647139769, 0.5930132482080505]	[0.39488259522981123, 1.2989194294943291, 0.6148794399339439]	copresence	[0.4048160161125004]	[100.0, 100.0, 100.0]	[0.03479975353590637, 0.23769791079953723, 0.0985766819919076]	2e-06	[dist_bray=0.19129229331490682, dist_kullbackleibler=8.12616789636067E-6, correl_spearman=0.017950339278390903]	[dist_bray, dist_kullbackleibler, correl_spearman]
13128	12817	Undirected	45	OTU-OTU102->OTU-OTU40		0.5	13980	OTU-OTU102->OTU-OTU40		OTU-OTU102->OTU-OTU40	FALSE		7.8e-05	0.000392	[8.444731868631097]	3	[8.637048439996738]	[dist_kullbackleibler=mutualExclusion, correl_spearman=mutualExclusion, dist_bray=mutualExclusion]	[dist_kullbackleibler=13.983905477607212	correl_spearman	-0.498551	[13.651942025580786, -0.48279502037921546, 0.9299584804840556]	[2.074886512341976]	[13.983905477607212, -0.49855086154778605, 0.9370841367361645]	[13.688226894520007, -0.4944103954330923, 0.9343305573451066]	mutualExclusion	[13.983905477607212]	[100.0, 100.0, 100.0]	[1.761027811907536, 0.13251344074848317, 0.023966963701163656]	7.8e-05	[dist_kullbackleibler=7.872497392469313E-5, correl_spearman=0.09549777982254459, dist_bray=0.15962460072290474]	[dist_kullbackleibler, correl_spearman, dist_bray]
13128	13066	Undirected	46	OTU-OTU102->OTU-OTU41		0.42	13979	OTU-OTU102->OTU-OTU41		OTU-OTU102->OTU-OTU41	FALSE		5e-06	2.9e-05	[0.7420677274305607]	3	[0.7269218813701573]	[dist_bray=copresence, correl_spearman=copresence, dist_kullbackleibler=copresence]	[dist_bray=0.5817688977857185	correl_spearman	0.42178	[0.566129108769699, 0.42399164760030794, 3.4629257895356584]	[0.07064778697390692]	[0.5817688977857185, 0.42177978456941495, 3.565232852500769]	[0.5590519029195192, 0.4428296923380468, 3.4386792913846578]	copresence	[0.5817688977857185]	[100.0, 100.0, 100.0]	[0.07798622648450412, 0.11358657397796852, 0.7319084358402397]	5e-06	[dist_bray=0.2823815008079389, correl_spearman=0.10662643899027274, dist_kullbackleibler=1.95944209269161E-6]	[dist_bray, correl_spearman, dist_kullbackleibler]
13128	12766	Undirected	47	OTU-OTU102->OTU-OTU42		0.56	13978	OTU-OTU102->OTU-OTU42		OTU-OTU102->OTU-OTU42	FALSE		0.00131	0.004808	[0.6193941354304041]	3	[0.6169425137943173]	[dist_bray=copresence, dist_kullbackleibler=copresence, correl_spearman=copresence]	[dist_bray=0.4778578828737594	correl_spearman	0.559499	[0.4643202386097594, 2.8794640278408843, 0.5585843381611659]	[0.05300460499801664]	[0.4778578828737594, 2.978545976075436, 0.5594985538753713]	[0.46534641137656074, 2.835370486151002, 0.5637666444868634]	copresence	[0.4778578828737594]	[100.0, 100.0, 100.0]	[0.06337276120901157, 1.0524683965436918, 0.10718977398289782]	0.00131	[dist_bray=0.2721674927345539, dist_kullbackleibler=0.0025447924156642987, correl_spearman=0.03885915174313753]	[dist_bray, dist_kullbackleibler, correl_spearman]
13128	12767	Undirected	48	OTU-OTU102->OTU-OTU43		0.49	13976	OTU-OTU102->OTU-OTU43		OTU-OTU102->OTU-OTU43	FALSE		0.0121	0.035265	[6.257178967429093]	3	[6.129757628166257]	[dist_kullbackleibler=copresence, correl_spearman=copresence, dist_bray=copresence]	[dist_kullbackleibler=3.695240115520928	correl_spearman	0.4899	[3.567562409799031, 0.47116075014951353, 0.4909440670690299]	[1.2022915211459781]	[3.695240115520928, 0.4899000639828609, 0.49821514932817423]	[3.668760694175927, 0.4755477047256205, 0.4871723646907504]	copresence	[3.695240115520928]	[98.0, 98.0, 98.0]	[1.1868744676169145, 0.13901945359646742, 0.07520282285020125]	0.0121	[dist_kullbackleibler=0.009340125442839353, correl_spearman=0.11281780425143684, dist_bray=0.3399419230168754]	[dist_kullbackleibler, correl_spearman, dist_bray]
13128	12810	Undirected	49	OTU-OTU102->OTU-OTU45		0.67	13975	OTU-OTU102->OTU-OTU45		OTU-OTU102->OTU-OTU45	FALSE		0	0	[0.6461972124659439]	3	[0.6373901166017459]	[dist_bray=copresence, dist_kullbackleibler=copresence, correl_spearman=copresence]	[dist_bray=0.5207854848165188	correl_spearman	0.666004	[0.5155981341883801, 2.0769977332327394, 0.6441453820706005]	[0.06310712269521714]	[0.5207854848165188, 2.1471156458791105, 0.6660037706945401]	[0.5204536089367733, 2.059932136964841, 0.6567752403105633]	copresence	[0.5207854848165188]	[100.0, 100.0, 100.0]	[0.06479106869534786, 0.41308634925548504, 0.10161848441244213]	0	[dist_bray=0.31615534625102526, dist_kullbackleibler=1.997579879287059E-11, correl_spearman=0.01936975947332853]	[dist_bray, dist_kullbackleibler, correl_spearman]
13128	12793	Undirected	50	OTU-OTU102->OTU-OTU52		0.62	13971	OTU-OTU102->OTU-OTU52		OTU-OTU102->OTU-OTU52	FALSE		0	1e-06	[5.381976144579751]	3	[5.3606380000493665]	[dist_kullbackleibler=copresence, dist_bray=copresence, correl_spearman=copresence]	[dist_kullbackleibler=1.6631151169768987	correl_spearman	0.623476	[1.7224595904015132, 0.37495846323123183, 0.5955788585623512]	[1.2822464252053616]	[1.6631151169768987, 0.3722622003360636, 0.6234764175940647]	[1.6837263257348303, 0.37368715080000686, 0.5965452627673313]	copresence	[1.6631151169768987]	[100.0, 100.0, 100.0]	[0.5161093477890782, 0.06750030560809181, 0.09149750169273321]	0	[dist_kullbackleibler=2.050308350876051E-7, dist_bray=0.20527995732736248, correl_spearman=0.029383074507713602]	[dist_kullbackleibler, dist_bray, correl_spearman]
13128	12791	Undirected	51	OTU-OTU102->OTU-OTU53		0.59	13970	OTU-OTU102->OTU-OTU53		OTU-OTU102->OTU-OTU53	FALSE		0	0	[-0.00826693324225251]	3	[0.0016378448139550692]	[correl_spearman=copresence, dist_bray=copresence, dist_kullbackleibler=copresence]	[correl_spearman=0.5885725791154097	[correl_spearman	0.588573	[0.5824317634428106, 0.49102794649270204, 1.7158117872061869]	[0.1668950989723858]	[0.5885725791154097, 0.5012789661251377, 1.7866032322690173]	[0.5866031331349169, 0.4997683286670149, 1.7086169303534624]	copresence	[0.5885725791154097]	[100.0, 100.0, 100.0]	[0.12250983666090474, 0.07440305864910894, 0.3855652438068097]	0	[correl_spearman=0.04852318892581753, dist_bray=0.31280657844498283, dist_kullbackleibler=1.122092418981424E-9]	[correl_spearman, dist_bray, dist_kullbackleibler]
13128	12884	Undirected	52	OTU-OTU102->OTU-OTU55		0.27	13967	OTU-OTU102->OTU-OTU55		OTU-OTU102->OTU-OTU55	FALSE		0.015793	0.044983	[0.8127141841447858]	3	[0.8084736121984413]	[dist_bray=mutualExclusion, dist_kullbackleibler=mutualExclusion, correl_spearman=mutualExclusion]	[dist_bray=0.9105334459867771	correl_spearman	-0.265026	[0.8943305447932519, 14.350293313578758, -0.27946178525341797]	[0.04590632041658007]	[0.9105334459867771, 15.717661725564128, -0.2650258259592041]	[0.9013517730094138, 15.412342882680598, -0.30641044931970024]	mutualExclusion	[0.9105334459867771]	[90.0, 90.0, 90.0]	[0.04124988491616962, 3.39135839009649, 0.13534141084380205]	0.015793	[dist_bray=0.336245802829356, dist_kullbackleibler=0.00645982438559678, correl_spearman=0.22780344327124658]	[dist_bray, dist_kullbackleibler, correl_spearman]
13128	12903	Undirected	53	OTU-OTU102->OTU-OTU56		0.44	13966	OTU-OTU102->OTU-OTU56		OTU-OTU102->OTU-OTU56	FALSE		0.005055	0.016257	[0.7434962878715289]	3	[0.7331629158632567]	[dist_bray=copresence, dist_kullbackleibler=copresence, correl_spearman=copresence]	[dist_bray=0.5677176600440141	correl_spearman	0.435333	[0.553543217797062, 4.755876893510221, 0.4211149946349786]	[0.06547394735744193]	[0.5677176600440141, 4.92053936120727, 0.43533310164038175]	[0.5493711266563429, 4.4153116703310005, 0.4096204834449786]	copresence	[0.5677176600440141]	[66.0, 66.0, 66.0]	[0.07768023411443814, 1.6051392306125445, 0.14821742381384867]	0.005055	[dist_bray=0.2596372798080404, dist_kullbackleibler=0.0035176106826598774, correl_spearman=0.1391247931751063]	[dist_bray, dist_kullbackleibler, correl_spearman]
13128	12879	Undirected	54	OTU-OTU102->OTU-OTU58		0.55	13965	OTU-OTU102->OTU-OTU58		OTU-OTU102->OTU-OTU58	FALSE		1e-06	7e-06	[0.017030145785442805]	3	[0.017876685948860854]	[correl_spearman=copresence, dist_kullbackleibler=copresence, dist_bray=copresence]	[correl_spearman=0.5474482280612135	[correl_spearman	0.547448	[0.5497589253438095, 3.404194992310294, 0.5029298675016423]	[0.1265892552816262]	[0.5474482280612135, 3.616346805997797, 0.5042618157576031]	[0.5497199642127526, 3.450487945352031, 0.5210827337764905]	copresence	[0.5474482280612135]	[70.0, 70.0, 70.0]	[0.12256006509475897, 1.0139367905142782, 0.09364767085967923]	1e-06	[correl_spearman=0.06434461799805136, dist_kullbackleibler=7.400535761981075E-7, dist_bray=0.22614298410118283]	[correl_spearman, dist_kullbackleibler, dist_bray]
13128	12779	Undirected	55	OTU-OTU102->OTU-OTU61		0.5	13955	OTU-OTU102->OTU-OTU61		OTU-OTU102->OTU-OTU61	FALSE		0	0	[0.006492667375950323]	3	[-0.010781481007306972]	[correl_spearman=copresence, dist_kullbackleibler=copresence, dist_bray=copresence]	[correl_spearman=0.49500361758843764	[correl_spearman	0.495004	[0.4836886616336059, 1.940285736738109, 0.4681094111516855]	[0.1449978962797957]	[0.49500361758843764, 1.9764608355222706, 0.4703351649934595]	[0.4961583603504218, 1.9368156106364296, 0.46271152947602034]	copresence	[0.49500361758843764]	[100.0, 100.0, 100.0]	[0.12920416484537472, 0.4404273436392319, 0.07395434729462576]	0	[correl_spearman=0.0844680196443483, dist_kullbackleibler=1.6292261095784966E-8, dist_bray=0.33953731534052556]	[correl_spearman, dist_kullbackleibler, dist_bray]
13128	12858	Undirected	56	OTU-OTU102->OTU-OTU64		0.35	13953	OTU-OTU102->OTU-OTU64		OTU-OTU102->OTU-OTU64	FALSE		7e-06	4.3e-05	[7.423717317828996]	3	[7.509130729472782]	[dist_kullbackleibler=copresence, correl_spearman=copresence, dist_bray=copresence]	[dist_kullbackleibler=3.7256188601988356	correl_spearman	0.349641	[3.698332455367935, 0.3299812363863071, 0.6558199810362173]	[1.643161584419223]	[3.7256188601988356, 0.34964088720941167, 0.659824843560169]	[3.7328933047754504, 0.357579942781391, 0.6588007792456063]	copresence	[3.7256188601988356]	[100.0, 100.0, 100.0]	[0.6541665917169466, 0.14229974826220945, 0.068841372005375]	7e-06	[dist_kullbackleibler=1.2286769499603167E-6, correl_spearman=0.17091250805541264, dist_bray=0.43555443864850885]	[dist_kullbackleibler, correl_spearman, dist_bray]
13128	12835	Undirected	58	OTU-OTU102->OTU-OTU79		0.39	13941	OTU-OTU102->OTU-OTU79		OTU-OTU102->OTU-OTU79	FALSE		0.011828	0.034617	[-0.016063227158452945]	3	[-0.0024314359894074774]	[correl_spearman=copresence, dist_bray=copresence, dist_kullbackleibler=copresence]	[correl_spearman=0.3925560025317372	[correl_spearman	0.392556	[0.38634315108830775, 0.4842805046104261, 4.881558334194115]	[0.15208332780463607]	[0.3925560025317372, 0.4957828863880691, 5.206884427912152]	[0.392033197632491, 0.4854165452992246, 4.700506989212009]	copresence	[0.3925560025317372]	[68.0, 68.0, 68.0]	[0.15215841648503572, 0.07596615363230197, 1.372958926984407]	0.011828	[correl_spearman=0.15946319781625962, dist_bray=0.2355747736833319, dist_kullbackleibler=0.009278028063427923]	[correl_spearman, dist_bray, dist_kullbackleibler]
13128	12826	Undirected	59	OTU-OTU102->OTU-OTU80		0.69	13930	OTU-OTU102->OTU-OTU80		OTU-OTU102->OTU-OTU80	FALSE		0	0	[0.5717928232834482]	3	[0.5647687524343532]	[dist_bray=copresence, dist_kullbackleibler=copresence, correl_spearman=copresence]	[dist_bray=0.43391650901462453	correl_spearman	0.694206	[0.42579444127728017, 1.2903185014319303, 0.6765187018322361]	[0.04245940801618646]	[0.43391650901462453, 1.3087668410306652, 0.6942057467393244]	[0.42799675488287053, 1.265682047819348, 0.6818322226025566]	copresence	[0.43391650901462453]	[100.0, 100.0, 100.0]	[0.047281668453866756, 0.2471064196649758, 0.08367342913515874]	0	[dist_bray=0.2613696946628439, dist_kullbackleibler=1.7469465873887202E-9, correl_spearman=0.0062006633356128105]	[dist_bray, dist_kullbackleibler, correl_spearman]
13128	12795	Undirected	60	OTU-OTU102->OTU-OTU81		0.69	13928	OTU-OTU102->OTU-OTU81		OTU-OTU102->OTU-OTU81	FALSE		2e-06	1.2e-05	[6.769561995224711]	3	[6.846035624459919]	[dist_kullbackleibler=copresence, dist_bray=copresence, correl_spearman=copresence]	[dist_kullbackleibler=2.2425480289421142	correl_spearman	0.694934	[2.24461406939442, 0.37063436016841433, 0.6709397845392177]	[1.4431810159348404]	[2.2425480289421142, 0.3662384744520667, 0.6949336890990488]	[2.2261716441925463, 0.36756312023567256, 0.674747808262055]	copresence	[2.2425480289421142]	[100.0, 100.0, 100.0]	[1.1477615137073995, 0.05411023697083438, 0.1039329164374292]	2e-06	[dist_kullbackleibler=8.733488891410346E-6, dist_bray=0.12230556055320374, correl_spearman=0.01989029050290403]	[dist_kullbackleibler, dist_bray, correl_spearman]
13128	13110	Undirected	61	OTU-OTU102->OTU-OTU82		0.42	13927	OTU-OTU102->OTU-OTU82		OTU-OTU102->OTU-OTU82	FALSE		0.003501	0.011732	[7.21642216353731]	3	[7.349390967788193]	[dist_kullbackleibler=copresence, correl_spearman=copresence, dist_bray=copresence]	[dist_kullbackleibler=4.6749575442563955	correl_spearman	0.422208	[4.410262003434822, 0.4245955490169694, 0.61427164622569]	[1.277362475760431]	[4.6749575442563955, 0.4222077662356826, 0.629070015278997]	[4.529806740589512, 0.42910062631527146, 0.612731896418748]	copresence	[4.6749575442563955]	[96.0, 96.0, 96.0]	[1.0475134645004154, 0.12865335697657093, 0.06601375822644019]	0.003501	[dist_kullbackleibler=0.0020413616556302916, correl_spearman=0.10996072517907102, dist_bray=0.3691152638781051]	[dist_kullbackleibler, correl_spearman, dist_bray]
13128	12824	Undirected	62	OTU-OTU102->OTU-OTU85		0.42	13925	OTU-OTU102->OTU-OTU85		OTU-OTU102->OTU-OTU85	FALSE		0.010716	0.031814	[-0.00896986002687785]	3	[-0.008041196079857222]	[correl_spearman=copresence, dist_bray=copresence, dist_kullbackleibler=copresence]	[correl_spearman=0.41898249530751	[correl_spearman	0.418982	[0.4135088536716281, 0.44119468413969676, 3.222994046118952]	[0.15773233366714126]	[0.41898249530751, 0.4367052687449826, 3.2306490071272824]	[0.4286633358552014, 0.44363259929964527, 3.052357950373068]	copresence	[0.41898249530751]	[100.0, 100.0, 100.0]	[0.12919962629334766, 0.07059111503288183, 1.1041731541152877]	0.010716	[correl_spearman=0.12044095596132065, dist_bray=0.2710358095200246, dist_kullbackleibler=0.009481552763919598]	[correl_spearman, dist_bray, dist_kullbackleibler]
13128	12822	Undirected	63	OTU-OTU102->OTU-OTU87		0.4	13923	OTU-OTU102->OTU-OTU87		OTU-OTU102->OTU-OTU87	FALSE		0.000127	0.000601	[-0.016963747013102153]	3	[0.00187031097672721]	[correl_spearman=copresence, dist_bray=copresence, dist_kullbackleibler=copresence]	[correl_spearman=0.4045837128758379	[correl_spearman	0.404584	[0.39086133047754684, 0.5233360066320296, 2.6205661495686714]	[0.16209593010150827]	[0.4045837128758379, 0.5337896233105242, 2.6862319516133315]	[0.3999102750882384, 0.5219812425229922, 2.5843668738251173]	copresence	[0.4045837128758379]	[100.0, 100.0, 100.0]	[0.12356537087611343, 0.07413161586179144, 0.5140820133447785]	0.000127	[correl_spearman=0.13423316674284325, dist_bray=0.35352504685091146, dist_kullbackleibler=4.272336167776558E-5]	[correl_spearman, dist_bray, dist_kullbackleibler]
13128	12819	Undirected	64	OTU-OTU102->OTU-OTU89		0.55	13921	OTU-OTU102->OTU-OTU89		OTU-OTU102->OTU-OTU89	FALSE		1e-05	5.7e-05	[0.6953852394962782]	3	[0.6871963882881127]	[dist_bray=copresence, correl_spearman=copresence, dist_kullbackleibler=copresence]	[dist_bray=0.5102680209286977	correl_spearman	0.546541	[0.48541724860852137, 0.5437660418773884, 3.5343182209245736]	[0.06728929548693534]	[0.5102680209286977, 0.5465414271872937, 3.964558108189838]	[0.48886285833163845, 0.5429298007875578, 3.598035135945432]	copresence	[0.5102680209286977]	[28.0, 28.0, 28.0]	[0.051118360598854, 0.1074986340360355, 0.9619930166074663]	1e-05	[dist_bray=0.18607373627556778, correl_spearman=0.04636321678487182, dist_kullbackleibler=1.500359987871569E-5]	[dist_bray, correl_spearman, dist_kullbackleibler]
13128	12781	Undirected	66	OTU-OTU102->OTU-OTU96		0.35	13912	OTU-OTU102->OTU-OTU96		OTU-OTU102->OTU-OTU96	FALSE		0.00795	0.024385	[0.6565560527609513]	3	[0.6578710725318451]	[dist_bray=copresence, dist_kullbackleibler=copresence, correl_spearman=copresence]	[dist_bray=0.6197919208904201	correl_spearman	0.347467	[0.6029656005301278, 4.097559114036338, 0.34505325628261935]	[0.05857811136391708]	[0.6197919208904201, 4.226505345875044, 0.3474668445495244]	[0.6192500506609908, 4.009339403611767, 0.33697092306252086]	copresence	[0.6197919208904201]	[100.0, 100.0, 100.0]	[0.08784588859086377, 1.1170003445959173, 0.13929141280750829]	0.00795	[dist_bray=0.4265170299345552, dist_kullbackleibler=0.003109202627085361, correl_spearman=0.16340117655148034]	[dist_bray, dist_kullbackleibler, correl_spearman]
13128	12796	Undirected	67	OTU-OTU102->OTU-OTU99		0.68	13910	OTU-OTU102->OTU-OTU99		OTU-OTU102->OTU-OTU99	FALSE		0	3e-06	[0.663940029057744]	3	[0.6559173605467561]	[dist_bray=copresence, correl_spearman=copresence, dist_kullbackleibler=copresence]	[dist_bray=0.37857851872435977	correl_spearman	0.679469	[0.3810358675413488, 0.6706949720661701, 2.482996214761257]	[0.05304069961466394]	[0.37857851872435977, 0.6794689419322943, 2.6115431938263085]	[0.38022010706062986, 0.6659074673121541, 2.423993522138405]	copresence	[0.37857851872435977]	[88.0, 88.0, 88.0]	[0.07005433516604731, 0.10565489700900335, 1.0565209271141254]	0	[dist_bray=0.14950671061596876, correl_spearman=0.018427652327736188, dist_kullbackleibler=1.620376562039283E-6]	[dist_bray, correl_spearman, dist_kullbackleibler]
13128	12804	Undirected	68	OTU-OTU102->OTU-OTU100		0.53	13150	OTU-OTU102->OTU-OTU100		OTU-OTU102->OTU-OTU100	FALSE		0.001054	0.003955	[6.289940829589732]	3	[6.349384165966878]	[dist_kullbackleibler=copresence, correl_spearman=copresence, dist_bray=copresence]	[dist_kullbackleibler=3.2521692135989575	correl_spearman	0.527517	[3.158331813669514, 0.5190741741206915, 0.47146925036707193]	[1.3963131671049396]	[3.2521692135989575, 0.5275167703304089, 0.4880182995521759]	[3.083625053464064, 0.5297602935996162, 0.468390557306115]	copresence	[3.2521692135989575]	[100.0, 100.0, 100.0]	[1.1401618789433186, 0.11733323857319879, 0.06414412974323849]	0.001054	[dist_kullbackleibler=0.0014018342285180285, correl_spearman=0.061395900206303644, dist_bray=0.24466532360919846]	[dist_kullbackleibler, correl_spearman, dist_bray]
13128	12802	Undirected	69	OTU-OTU102->OTU-OTU101		0.6	13148	OTU-OTU102->OTU-OTU101		OTU-OTU102->OTU-OTU101	FALSE		0	0	[0.6220174867137378]	3	[0.619172027280579]	[dist_bray=copresence, correl_spearman=copresence, dist_kullbackleibler=copresence]	[dist_bray=0.40990083742602057	correl_spearman	0.599619	[0.40595379564209094, 0.5903825523606577, 1.4994097733243985]	[0.05268806946599976]	[0.40990083742602057, 0.5996192660300588, 1.4952503690181762]	[0.40293206605853504, 0.6019211198676395, 1.4729382909651454]	copresence	[0.40990083742602057]	[100.0, 100.0, 100.0]	[0.054888269946415186, 0.09296804451926047, 0.3190064890168904]	0	[dist_bray=0.1813874003831446, correl_spearman=0.027187880476937987, dist_kullbackleibler=6.661338147750939E-16]	[dist_bray, correl_spearman, dist_kullbackleibler]
13128	12865	Undirected	70	OTU-OTU102->OTU-OTU107		0.64	13143	OTU-OTU102->OTU-OTU107		OTU-OTU102->OTU-OTU107	FALSE		0	0	[-0.003603688061430456]	3	[-0.009450268543184046]	[correl_spearman=copresence, dist_bray=copresence, dist_kullbackleibler=copresence]	[correl_spearman=0.637691427706261	[correl_spearman	0.637691	[0.6537576720353823, 0.4850438602034393, 3.3226755099794154]	[0.15487901993242556]	[0.637691427706261, 0.5206847198868867, 3.8650556728380576]	[0.661966151561242, 0.4844756798022479, 3.2706864153717925]	copresence	[0.637691427706261]	[34.0, 34.0, 34.0]	[0.1074705228001162, 0.05576616660617334, 1.0213307109466507]	0	[correl_spearman=0.021534375752558566, dist_bray=0.13570732850588274, dist_kullbackleibler=1.841563934679158E-8]	[correl_spearman, dist_bray, dist_kullbackleibler]
13128	12787	Undirected	71	OTU-OTU102->OTU-OTU110		0.65	13129	OTU-OTU102->OTU-OTU110		OTU-OTU102->OTU-OTU110	FALSE		0.000306	0.001315	[0.6552873837564008]	3	[0.6522627796785375]	[dist_bray=mutualExclusion, correl_spearman=mutualExclusion, dist_kullbackleibler=mutualExclusion]	[dist_bray=0.7854892926602876	correl_spearman	-0.646389	[0.7736218763118745, -0.6263846274900307, 8.87328185738353]	[0.0550254005781325]	[0.7854892926602876, -0.6463890646892919, 9.282039820146128]	[0.78106163220471, -0.6369964093706668, 8.947187834770194]	mutualExclusion	[0.7854892926602876]	[100.0, 100.0, 100.0]	[0.05544818559801019, 0.11130605494864985, 1.5562971666922838]	0.000306	[dist_bray=0.3031432950486618, correl_spearman=0.03310319943158202, dist_kullbackleibler=5.293773903853882E-4]	[dist_bray, correl_spearman, dist_kullbackleibler]
13115	12804	Undirected	72	OTU-OTU93->OTU-OTU100		0.61	14057	OTU-OTU93->OTU-OTU100		OTU-OTU93->OTU-OTU100	FALSE		0.00042	0.001739	[0.6526668188082103]	3	[0.6555459692209431]	[dist_bray=mutualExclusion, correl_spearman=mutualExclusion, dist_kullbackleibler=mutualExclusion]	[dist_bray=0.828626595255413	correl_spearman	-0.612892	[0.8191752442997386, -0.6051129079869296, 8.388895880481208]	[0.0540355717541669]	[0.828626595255413, -0.6128920783529889, 8.572635196597547]	[0.8206806553989712, -0.6194358694443509, 8.43604896368258]	mutualExclusion	[0.828626595255413]	[100.0, 100.0, 100.0]	[0.033050787290468425, 0.0946971063500753, 1.3087381643513725]	0.00042	[dist_bray=0.18404491040120807, correl_spearman=0.03126032539481649, dist_kullbackleibler=0.0013117653719973976]	[dist_bray, correl_spearman, dist_kullbackleibler]
13115	12784	Undirected	73	OTU-OTU93->OTU-OTU104		0.55	14054	OTU-OTU93->OTU-OTU104		OTU-OTU93->OTU-OTU104	FALSE		0.012285	0.035746	[0.8630522853885128]	3	[0.8558040070562584]	[dist_bray=mutualExclusion, correl_spearman=mutualExclusion, dist_kullbackleibler=mutualExclusion]	[dist_bray=0.9259343947205426	correl_spearman	-0.554744	[0.9047954710953546, -0.5527350418663197, 12.223740196093882]	[0.03802591284555869]	[0.9259343947205426, -0.5547439934812801, 13.744526172970113]	[0.908180987366449, -0.5506726077037123, 12.899098248487912]	mutualExclusion	[0.9259343947205426]	[4.0, 4.0, 4.0]	[0.034581434878560656, 0.11098265744527115, 1.9204596219899543]	0.012285	[dist_bray=0.3961017123750433, correl_spearman=0.04431298739228873, dist_kullbackleibler=0.02078554911057373]	[dist_bray, correl_spearman, dist_kullbackleibler]
13115	12868	Undirected	74	OTU-OTU93->OTU-OTU105		0.66	14053	OTU-OTU93->OTU-OTU105		OTU-OTU93->OTU-OTU105	FALSE		0	0	[3.9260949368077407]	3	[4.023518128057783]	[dist_kullbackleibler=copresence, dist_bray=copresence, correl_spearman=copresence]	[dist_kullbackleibler=0.9305973009197375	correl_spearman	0.663064	[0.9647938310324963, 0.286247302709698, 0.6447093417520502]	[0.8857954343608079]	[0.9305973009197375, 0.2943155386762917, 0.6630642864040511]	[0.9363831561150266, 0.28541288497139244, 0.6511420014803093]	copresence	[0.9305973009197375]	[100.0, 100.0, 100.0]	[0.3223566716148533, 0.044307370890195735, 0.11772537804801797]	0	[dist_kullbackleibler=3.5759922689670987E-8, dist_bray=0.04648338407769925, correl_spearman=0.027463746170552972]	[dist_kullbackleibler, dist_bray, correl_spearman]
13115	12865	Undirected	75	OTU-OTU93->OTU-OTU107		0.68	14051	OTU-OTU93->OTU-OTU107		OTU-OTU93->OTU-OTU107	FALSE		0	0	[0.7491478489736277]	3	[0.7465597027468963]	[dist_bray=mutualExclusion, correl_spearman=mutualExclusion, dist_kullbackleibler=mutualExclusion]	[dist_bray=0.9206497584699705	correl_spearman	-0.680265	[0.9081275823969033, -0.680617547689694, 11.957448956725989]	[0.07475405003891065]	[0.9206497584699705, -0.6802648393975349, 12.32522764081385]	[0.9075200727639304, -0.6956563199552407, 12.062236336702968]	mutualExclusion	[0.9206497584699705]	[34.0, 34.0, 34.0]	[0.02436217888885963, 0.07870197237884505, 0.7153358074495595]	0	[dist_bray=0.15030295219483403, correl_spearman=0.005433228308126203, dist_kullbackleibler=2.6053927226765694E-7]	[dist_bray, correl_spearman, dist_kullbackleibler]
13115	12787	Undirected	76	OTU-OTU93->OTU-OTU110		0.77	14044	OTU-OTU93->OTU-OTU110		OTU-OTU93->OTU-OTU110	FALSE		0	0	[-0.03511198945981553]	3	[-0.02817391304347823]	[correl_spearman=copresence, dist_bray=copresence, dist_kullbackleibler=copresence]	[correl_spearman=0.7732542819499336	[correl_spearman	0.773254	[0.760303814823895, 0.3195758580000817, 0.7346278622988527]	[0.14311115774231337]	[0.7732542819499336, 0.3209373651681281, 0.7354836164571216]	[0.7756584132966438, 0.31630231760541755, 0.7227063819233823]	copresence	[0.7732542819499336]	[100.0, 100.0, 100.0]	[0.07750707432836391, 0.04831021835620019, 0.17399063760598465]	0	[correl_spearman=0.0023116894487405504, dist_bray=0.06245847483685396, dist_kullbackleibler=9.825473767932635E-14]	[correl_spearman, dist_bray, dist_kullbackleibler]
13115	12861	Undirected	77	OTU-OTU93->OTU-OTU4		0.48	14033	OTU-OTU93->OTU-OTU4		OTU-OTU93->OTU-OTU4	FALSE		0.000574	0.002282	[-0.018845890243472118]	3	[-0.007839624906210546]	[correl_spearman=mutualExclusion, dist_bray=mutualExclusion, dist_kullbackleibler=mutualExclusion]	[correl_spearman=-0.4789775907654287	[correl_spearman	-0.478978	[-0.4617132480434519, 0.7997203980457539, 9.425475282521267]	[0.1342199534261293]	[-0.4789775907654287, 0.814179614681763, 9.890400946722423]	[-0.4774063176728208, 0.8057866975744019, 9.630925794211596]	mutualExclusion	[-0.4789775907654287]	[100.0, 100.0, 100.0]	[0.12330639372861976, 0.03892506583499757, 1.2667611944486832]	0.000574	[correl_spearman=0.0980860519557849, dist_bray=0.2751955160548534, dist_kullbackleibler=3.954425291200492E-4]	[correl_spearman, dist_bray, dist_kullbackleibler]
13115	12782	Undirected	78	OTU-OTU93->OTU-OTU10		0.41	13430	OTU-OTU93->OTU-OTU10		OTU-OTU93->OTU-OTU10	FALSE		0.004716	0.015295	[6.21269486430926]	3	[6.1371439865371515]	[dist_kullbackleibler=mutualExclusion, correl_spearman=mutualExclusion, dist_bray=mutualExclusion]	[dist_kullbackleibler=9.482397665748692	correl_spearman	-0.410441	[8.968571604264941, -0.405852938011366, 0.7980836639741746]	[1.1549114704336807]	[9.482397665748692, -0.4104406547009425, 0.8168577623232707]	[9.02116630761221, -0.42198668595283834, 0.8063263160112344]	mutualExclusion	[9.482397665748692]	[86.0, 86.0, 86.0]	[1.0717694638090662, 0.12459274993841744, 0.0514392973562586]	0.004716	[dist_kullbackleibler=0.003119166354261016, correl_spearman=0.11941209654725282, dist_bray=0.3145906276399455]	[dist_kullbackleibler, correl_spearman, dist_bray]
13115	12777	Undirected	79	OTU-OTU93->OTU-OTU13		0.55	13427	OTU-OTU93->OTU-OTU13		OTU-OTU93->OTU-OTU13	FALSE		1e-06	5e-06	[0.661881895552781]	3	[0.6513183880711602]	[dist_bray=copresence, dist_kullbackleibler=copresence, correl_spearman=copresence]	[dist_bray=0.3742328440289555	correl_spearman	0.548055	[0.37646447198178945, 1.3184522071174078, 0.5428154733729111]	[0.06295064548242936]	[0.3742328440289555, 1.3514787779072222, 0.548055491521393]	[0.3649213301396741, 1.2917002460852636, 0.5424761457310188]	copresence	[0.3742328440289555]	[100.0, 100.0, 100.0]	[0.06255194981474291, 0.3434300796863856, 0.11386984204743852]	1e-06	[dist_bray=0.13589296761451386, dist_kullbackleibler=1.37806492261916E-6, correl_spearman=0.04019482242712252]	[dist_bray, dist_kullbackleibler, correl_spearman]
13115	12875	Undirected	80	OTU-OTU93->OTU-OTU16		0.76	13424	OTU-OTU93->OTU-OTU16		OTU-OTU93->OTU-OTU16	FALSE		0	0	[6.884951924996509]	3	[6.939246746640441]	[dist_kullbackleibler=mutualExclusion, correl_spearman=mutualExclusion, dist_bray=mutualExclusion]	[dist_kullbackleibler=12.349149960802297	correl_spearman	-0.76088	[11.893991846143734, -0.7474657185073079, 0.8900859302072504]	[1.3035670240572823]	[12.349149960802297, -0.760880460309702, 0.8959089088723886]	[11.775759811104614, -0.749836048379578, 0.8953229891006038]	mutualExclusion	[12.349149960802297]	[96.0, 96.0, 96.0]	[1.022650755499397, 0.07421160930711027, 0.029881024310583926]	0	[dist_kullbackleibler=4.802420077165692E-7, correl_spearman=0.003973436928668472, dist_bray=0.17843192358119708]	[dist_kullbackleibler, correl_spearman, dist_bray]
13115	12770	Undirected	81	OTU-OTU93->OTU-OTU18		0.63	13422	OTU-OTU93->OTU-OTU18		OTU-OTU93->OTU-OTU18	FALSE		7.4e-05	0.000371	[0.015150027552456057]	3	[0.004895265783463329]	[correl_spearman=mutualExclusion, dist_bray=mutualExclusion, dist_kullbackleibler=mutualExclusion]	[correl_spearman=-0.6250428798476595	[correl_spearman	-0.625043	[-0.6103765345431983, 0.8456895663169186, 9.817777982220786]	[0.14472490689549128]	[-0.6250428798476595, 0.8573020846051284, 10.15357119059736]	[-0.6212242127746433, 0.8494250025718677, 9.928417610766518]	mutualExclusion	[-0.6250428798476595]	[80.0, 80.0, 80.0]	[0.09849062098998268, 0.0418372346457179, 0.8252055128210937]	7.4e-05	[correl_spearman=0.024967970518216975, dist_bray=0.2789147067756699, dist_kullbackleibler=1.6206465788448643E-4]	[correl_spearman, dist_bray, dist_kullbackleibler]
13115	12808	Undirected	82	OTU-OTU93->OTU-OTU21		0.64	13411	OTU-OTU93->OTU-OTU21		OTU-OTU93->OTU-OTU21	FALSE		2.8e-05	0.000152	[0.7197285488178208]	3	[0.7152864842351252]	[dist_bray=mutualExclusion, dist_kullbackleibler=mutualExclusion, correl_spearman=mutualExclusion]	[dist_bray=0.8780915152001841	correl_spearman	-0.638815	[0.8734256845673809, 10.541295348962072, -0.6361500764361495]	[0.06519786540763173]	[0.8780915152001841, 10.898070845909235, -0.6388147614654365]	[0.8738355870962027, 10.533952537063062, -0.6394755454255265]	mutualExclusion	[0.8780915152001841]	[72.0, 72.0, 72.0]	[0.03294915875352794, 0.9452192196312111, 0.09249145795418423]	2.8e-05	[dist_bray=0.1918227503507326, dist_kullbackleibler=1.1322033066740733E-4, correl_spearman=0.018510637718375245]	[dist_bray, dist_kullbackleibler, correl_spearman]
13115	12806	Undirected	83	OTU-OTU93->OTU-OTU22		0.63	13408	OTU-OTU93->OTU-OTU22		OTU-OTU93->OTU-OTU22	FALSE		2e-06	1.4e-05	[7.219396561800894]	3	[7.3498835627524315]	[dist_kullbackleibler=mutualExclusion, correl_spearman=mutualExclusion, dist_bray=mutualExclusion]	[dist_kullbackleibler=11.024476269567849	correl_spearman	-0.627977	[10.732644842176397, -0.6419445959032762, 0.8973480979002344]	[1.1643186285625968]	[11.024476269567849, -0.6279765686708256, 0.909150848279762]	[10.644502208825772, -0.656381897382416, 0.8988395742118706]	mutualExclusion	[11.024476269567849]	[6.0, 6.0, 6.0]	[0.7232077661743308, 0.06638209920809908, 0.019305816408632843]	2e-06	[dist_kullbackleibler=3.4782115085785215E-5, correl_spearman=0.006249138851841085, dist_bray=0.1120694625714238]	[dist_kullbackleibler, correl_spearman, dist_bray]
13115	12847	Undirected	84	OTU-OTU93->OTU-OTU27		0.39	13407	OTU-OTU93->OTU-OTU27		OTU-OTU93->OTU-OTU27	FALSE		0.003781	0.012552	[6.031007321936514]	3	[6.120492042189136]	[dist_kullbackleibler=mutualExclusion, dist_bray=mutualExclusion, correl_spearman=mutualExclusion]	[dist_kullbackleibler=9.874985990470906	correl_spearman	-0.391898	[9.471476315397759, 0.7627971742608333, -0.3826403577441783]	[1.1906836378339083]	[9.874985990470906, 0.7687185116083275, -0.39189757826655386]	[9.580278086601087, 0.767793153802862, -0.3970104503156055]	mutualExclusion	[9.874985990470906]	[92.0, 92.0, 92.0]	[1.2947367765072926, 0.051091309607277056, 0.13803317967535136]	0.003781	[dist_kullbackleibler=0.001614902550076347, dist_bray=0.35012367367755937, correl_spearman=0.16022202824583098]	[dist_kullbackleibler, dist_bray, correl_spearman]
13115	12844	Undirected	85	OTU-OTU93->OTU-OTU29		0.65	13405	OTU-OTU93->OTU-OTU29		OTU-OTU93->OTU-OTU29	FALSE		9.2e-05	0.000451	[0.7441646231229935]	3	[0.7354111074925039]	[dist_bray=mutualExclusion, dist_kullbackleibler=mutualExclusion, correl_spearman=mutualExclusion]	[dist_bray=0.874728178725874	correl_spearman	-0.653258	[0.8610530348793355, 11.078096643878725, -0.6440615437670245]	[0.04944118674737787]	[0.874728178725874, 11.703839827738282, -0.6532580687756281]	[0.8618392574885083, 11.259775955687081, -0.661354129249394]	mutualExclusion	[0.874728178725874]	[88.0, 88.0, 88.0]	[0.03984889818251988, 1.3036105373602649, 0.1070801642510492]	9.2e-05	[dist_bray=0.2645437548019205, dist_kullbackleibler=2.407192037728878E-4, correl_spearman=0.022382054228520687]	[dist_bray, dist_kullbackleibler, correl_spearman]
13115	12917	Undirected	86	OTU-OTU93->OTU-OTU30		0.49	13394	OTU-OTU93->OTU-OTU30		OTU-OTU93->OTU-OTU30	FALSE		4.8e-05	0.000251	[5.961791967564618]	3	[6.01268622664436]	[dist_kullbackleibler=copresence, correl_spearman=copresence, dist_bray=copresence]	[dist_kullbackleibler=2.7562356974168876	correl_spearman	0.493139	[2.6863549272477822, 0.4615551669320636, 0.5022650106616162]	[1.2269533740212206]	[2.7562356974168876, 0.49313927782441697, 0.5226728418663633]	[2.644422372776065, 0.484652538852972, 0.5121765537914907]	copresence	[2.7562356974168876]	[100.0, 100.0, 100.0]	[0.706418292428148, 0.13453233061472988, 0.06985769891131624]	4.8e-05	[dist_kullbackleibler=3.784949189400422E-5, correl_spearman=0.10228763957603765, dist_bray=0.18371462408666916]	[dist_kullbackleibler, correl_spearman, dist_bray]
13115	12833	Undirected	87	OTU-OTU93->OTU-OTU36		0.74	13391	OTU-OTU93->OTU-OTU36		OTU-OTU93->OTU-OTU36	FALSE		6e-06	3.7e-05	[-0.048187222071462386]	3	[-0.047197109793058335]	[correl_spearman=mutualExclusion, dist_bray=mutualExclusion, dist_kullbackleibler=mutualExclusion]	[correl_spearman=-0.742122771655983	[correl_spearman	-0.742123	[-0.7334193442572956, 0.7831452757137353, 8.559597572589087]	[0.15249321839522306]	[-0.742122771655983, 0.7892618966817275, 8.85787420925111]	[-0.7509953374874991, 0.7839948259078484, 8.574243034310186]	mutualExclusion	[-0.742122771655983]	[100.0, 100.0, 100.0]	[0.08179955084488706, 0.04096301202275337, 1.365764456988191]	6e-06	[correl_spearman=0.008212633882394793, dist_bray=0.20562146025536632, dist_kullbackleibler=4.598967612789995E-5]	[correl_spearman, dist_bray, dist_kullbackleibler]
13115	13042	Undirected	88	OTU-OTU93->OTU-OTU39		0.49	13389	OTU-OTU93->OTU-OTU39		OTU-OTU93->OTU-OTU39	FALSE		0.010296	0.030747	[3.0557627174239563]	3	[3.1271163629702947]	[dist_kullbackleibler=copresence, correl_spearman=copresence, dist_bray=copresence]	[dist_kullbackleibler=1.7186900789828783	correl_spearman	0.486182	[1.7230019700670505, 0.4632753499836607, 0.46949104499518235]	[0.5907228579591508]	[1.7186900789828783, 0.48618202206947536, 0.47906958985428894]	[1.6938103412470755, 0.47049873033319667, 0.47647796127447467]	copresence	[1.7186900789828783]	[100.0, 100.0, 100.0]	[0.371244738139689, 0.13447271180301612, 0.06609159081220829]	0.010296	[dist_kullbackleibler=0.010597946993138319, correl_spearman=0.09277263748689185, dist_bray=0.3000413129034859]	[dist_kullbackleibler, correl_spearman, dist_bray]
13115	12767	Undirected	89	OTU-OTU93->OTU-OTU43		0.54	13377	OTU-OTU93->OTU-OTU43		OTU-OTU93->OTU-OTU43	FALSE		0.000388	0.001616	[5.237139553648699]	3	[5.161459854563686]	[dist_kullbackleibler=mutualExclusion, correl_spearman=mutualExclusion, dist_bray=mutualExclusion]	[dist_kullbackleibler=8.919702648482323	correl_spearman	-0.537979	[8.58773702590585, -0.5242119029337593, 0.7667040133437978]	[0.99088413430875]	[8.919702648482323, -0.5379794065060373, 0.7812662981024884]	[8.647677026207578, -0.5357451598075261, 0.7682152499436048]	mutualExclusion	[8.919702648482323]	[98.0, 98.0, 98.0]	[1.0286937798221345, 0.11345315607730395, 0.055094452275759785]	0.000388	[dist_kullbackleibler=3.648710897526941E-4, correl_spearman=0.06722499151732919, dist_bray=0.28117936880516003]	[dist_kullbackleibler, correl_spearman, dist_bray]
13115	12810	Undirected	90	OTU-OTU93->OTU-OTU45		0.51	13375	OTU-OTU93->OTU-OTU45		OTU-OTU93->OTU-OTU45	FALSE		0.001908	0.006743	[-0.00821344582755435]	3	[-0.0031676633584324944]	[correl_spearman=mutualExclusion, dist_bray=mutualExclusion, dist_kullbackleibler=mutualExclusion]	[correl_spearman=-0.5101647201876066	[correl_spearman	-0.510165	[-0.5009831278620259, 0.7922009691083004, 8.880537874893902]	[0.13675833654111802]	[-0.5101647201876066, 0.8081714466746401, 9.094813315171129]	[-0.4977540801255031, 0.7977543379667541, 8.893025766600758]	mutualExclusion	[-0.5101647201876066]	[100.0, 100.0, 100.0]	[0.11900898992705673, 0.04744087298129933, 1.4291642282962729]	0.001908	[correl_spearman=0.07450454117186844, dist_bray=0.26507132963863234, dist_kullbackleibler=0.002089073729618529]	[correl_spearman, dist_bray, dist_kullbackleibler]
13115	12870	Undirected	92	OTU-OTU93->OTU-OTU76		0.33	13341	OTU-OTU93->OTU-OTU76		OTU-OTU93->OTU-OTU76	FALSE		0.00504	0.016223	[0.7754966848198144]	3	[0.7736535344103663]	[dist_bray=copresence, dist_kullbackleibler=copresence, correl_spearman=copresence]	[dist_bray=0.5560318230610288	correl_spearman	0.325686	[0.5219424841935079, 4.300774493678627, 0.32898198234492276]	[0.06663539229504618]	[0.5560318230610288, 4.816212304909584, 0.3256860890050856]	[0.5243822677483267, 4.283567731791455, 0.31830119481026303]	copresence	[0.5560318230610288]	[26.0, 26.0, 26.0]	[0.0970695073276994, 1.2795764067769737, 0.14611151837136616]	0.00504	[dist_bray=0.20957232950691984, dist_kullbackleibler=0.0033110525587826123, correl_spearman=0.18247308300123233]	[dist_bray, dist_kullbackleibler, correl_spearman]
13115	12837	Undirected	93	OTU-OTU93->OTU-OTU77		0.54	13339	OTU-OTU93->OTU-OTU77		OTU-OTU93->OTU-OTU77	FALSE		0.009343	0.028165	[0.7778992816682815]	3	[0.7708383172716128]	[dist_bray=mutualExclusion, correl_spearman=mutualExclusion, dist_kullbackleibler=mutualExclusion]	[dist_bray=0.8647704621864066	correl_spearman	-0.542889	[0.8540481492757713, -0.540783574839411, 10.155574392266633]	[0.059404360749364366]	[0.8647704621864066, -0.5428886673547952, 10.640635814081767]	[0.857224647712414, -0.5595358216176524, 10.1807671816436]	mutualExclusion	[0.8647704621864066]	[52.0, 52.0, 52.0]	[0.046144673392698836, 0.11417709806259428, 1.0754804308862147]	0.009343	[dist_bray=0.34924515816499546, correl_spearman=0.05168651827542614, dist_kullbackleibler=0.014549569063607715]	[dist_bray, correl_spearman, dist_kullbackleibler]
13115	12795	Undirected	94	OTU-OTU93->OTU-OTU81		0.57	13322	OTU-OTU93->OTU-OTU81		OTU-OTU93->OTU-OTU81	FALSE		3.7e-05	0.000197	[5.99219568553111]	3	[5.973144102563952]	[dist_kullbackleibler=mutualExclusion, dist_bray=mutualExclusion, correl_spearman=mutualExclusion]	[dist_kullbackleibler=10.72657773462951	correl_spearman	-0.568691	[10.272349615990029, 0.7812591030465288, -0.5453915290786638]	[1.2712235061040702]	[10.72657773462951, 0.7897638651365742, -0.5686910258846757]	[10.359376109408139, 0.7841852739085902, -0.5521573151511294]	mutualExclusion	[10.72657773462951]	[100.0, 100.0, 100.0]	[1.1749203579836045, 0.049079216641124225, 0.10339440235593438]	3.7e-05	[dist_kullbackleibler=3.6500679256645796E-5, dist_bray=0.2944452973833529, correl_spearman=0.05016556207903078]	[dist_kullbackleibler, dist_bray, correl_spearman]
13115	12819	Undirected	96	OTU-OTU93->OTU-OTU89		0.65	13316	OTU-OTU93->OTU-OTU89		OTU-OTU93->OTU-OTU89	FALSE		0	2e-06	[0.7136022624337579]	3	[0.7121612958394927]	[dist_bray=mutualExclusion, dist_kullbackleibler=mutualExclusion, correl_spearman=mutualExclusion]	[dist_bray=0.874732145204386	correl_spearman	-0.650585	[0.860488736426134, 10.31378779496509, -0.6614285514219499]	[0.06418934502203787]	[0.874732145204386, 10.640214547365366, -0.6505854966357627]	[0.8653686925092647, 10.327784030882361, -0.6559738699484173]	mutualExclusion	[0.874732145204386]	[28.0, 28.0, 28.0]	[0.03490757619167144, 0.6850961945628969, 0.06839997330999398]	0	[dist_bray=0.2136290312594693, dist_kullbackleibler=2.971808647722618E-6, correl_spearman=0.005019895036152189]	[dist_bray, dist_kullbackleibler, correl_spearman]
13115	12796	Undirected	97	OTU-OTU93->OTU-OTU99		0.68	13294	OTU-OTU93->OTU-OTU99		OTU-OTU93->OTU-OTU99	FALSE		2e-06	1.1e-05	[0.0033564226283017105]	3	[-0.007696482581958783]	[correl_spearman=mutualExclusion, dist_kullbackleibler=mutualExclusion, dist_bray=mutualExclusion]	[correl_spearman=-0.6815592888082045	[correl_spearman	-0.681559	[-0.6705578749555404, 10.118255129334981, 0.8465333584041747]	[0.1356321518128536]	[-0.6815592888082045, 10.4816782042945, 0.8557288146972559]	[-0.6858279296286782, 10.271587642221583, 0.8498053086090144]	mutualExclusion	[-0.6815592888082045]	[88.0, 88.0, 88.0]	[0.0831906721203765, 0.9202641427614471, 0.034796577568200746]	2e-06	[correl_spearman=0.010775567435472921, dist_kullbackleibler=1.0354573070858741E-5, dist_bray=0.18070103838154128]	[correl_spearman, dist_kullbackleibler, dist_bray]
13110	12804	Undirected	98	OTU-OTU82->OTU-OTU100		0.46	13667	OTU-OTU82->OTU-OTU100		OTU-OTU82->OTU-OTU100	FALSE		0.000113	0.000542	[0.0015060787913999524]	3	[-0.003818936608102112]	[correl_spearman=copresence, dist_bray=copresence, dist_kullbackleibler=copresence]	[correl_spearman=0.4597647801382764	[correl_spearman	0.459765	[0.46455229064478626, 0.5665958134088724, 3.7116509837092786]	[0.1596809256258342]	[0.4597647801382764, 0.5780361998831012, 3.7572556308831486]	[0.480971991890114, 0.5659799763983658, 3.5727555520354626]	copresence	[0.4597647801382764]	[96.0, 96.0, 96.0]	[0.14355230547023487, 0.08154870957199854, 1.150615726782251]	0.000113	[correl_spearman=0.10819402852033527, dist_bray=0.2967277744543312, dist_kullbackleibler=5.585518267503531E-5]	[correl_spearman, dist_bray, dist_kullbackleibler]
13110	12802	Undirected	99	OTU-OTU82->OTU-OTU101		0.44	13666	OTU-OTU82->OTU-OTU101		OTU-OTU82->OTU-OTU101	FALSE		0.000773	0.002985	[-0.010441201903905066]	3	[0.0021895304457624186]	[correl_spearman=copresence, dist_kullbackleibler=copresence, dist_bray=copresence]	[correl_spearman=0.43679606104309837	[correl_spearman	0.436796	[0.45666584760808565, 4.364699306758701, 0.551328489896605]	[0.14796632649121286]	[0.43679606104309837, 4.6332009793245605, 0.5674354695280247]	[0.46347665409264355, 4.380405695149758, 0.5547798176589387]	copresence	[0.43679606104309837]	[96.0, 96.0, 96.0]	[0.13130377423147038, 1.2562653722914587, 0.07143636531476279]	0.000773	[correl_spearman=0.10488158744471904, dist_kullbackleibler=4.7357238645617805E-4, dist_bray=0.29913758806893975]	[correl_spearman, dist_kullbackleibler, dist_bray]
13110	12865	Undirected	100	OTU-OTU82->OTU-OTU107		0.5	13662	OTU-OTU82->OTU-OTU107		OTU-OTU82->OTU-OTU107	FALSE		1e-06	4e-06	[0.033280011696593906]	3	[0.013242525031786263]	[correl_spearman=copresence, dist_bray=copresence, dist_kullbackleibler=copresence]	[correl_spearman=0.5013991323572343	[correl_spearman	0.501399	[0.5176057462889149, 0.5044626262430268, 4.909617859351418]	[0.16997011703287584]	[0.5013991323572343, 0.5424174915389235, 5.446362291854867]	[0.5131861703118338, 0.49539533940894365, 4.790212877224256]	copresence	[0.5013991323572343]	[34.0, 34.0, 34.0]	[0.12889702962061308, 0.07531967755476023, 1.452934221363603]	1e-06	[correl_spearman=0.08003679244349626, dist_bray=0.15819493999593315, dist_kullbackleibler=5.042084987305628E-7]	[correl_spearman, dist_bray, dist_kullbackleibler]
13110	12787	Undirected	101	OTU-OTU82->OTU-OTU110		0.57	13654	OTU-OTU82->OTU-OTU110		OTU-OTU82->OTU-OTU110	FALSE		5.4e-05	0.000277	[0.7095442917456215]	3	[0.7120474924404857]	[dist_bray=mutualExclusion, correl_spearman=mutualExclusion, dist_kullbackleibler=mutualExclusion]	[dist_bray=0.8585378246139841	correl_spearman	-0.57171	[0.8495255436195901, -0.5600970827326439, 10.60245198727051]	[0.06642113417259116]	[0.8585378246139841, -0.571710209295388, 10.850594652499263]	[0.8600547205776008, -0.5819274960510672, 10.719271827556092]	mutualExclusion	[0.8585378246139841]	[96.0, 96.0, 96.0]	[0.05272857139696965, 0.1125487501690905, 1.0502500950215143]	5.4e-05	[dist_bray=0.27468596988479144, correl_spearman=0.05273589924100319, dist_kullbackleibler=5.525183214227791E-5]	[dist_bray, correl_spearman, dist_kullbackleibler]
13110	12896	Undirected	103	OTU-OTU82->OTU-OTU1		0.41	13478	OTU-OTU82->OTU-OTU1		OTU-OTU82->OTU-OTU1	FALSE		0.004832	0.015613	[8.383377559843732]	3	[8.53601350835706]	[dist_kullbackleibler=copresence, dist_bray=copresence, correl_spearman=copresence]	[dist_kullbackleibler=5.583598759446776	correl_spearman	0.414354	[5.309303090436577, 0.6482479811235565, 0.4287587211314485]	[1.8444854551532137]	[5.583598759446776, 0.6556273282354237, 0.4143541460467116]	[5.285733827583381, 0.6553427281880185, 0.426365927322388]	copresence	[5.583598759446776]	[94.0, 94.0, 94.0]	[1.3517833414242901, 0.07276479243229592, 0.1436543601791118]	0.004832	[dist_kullbackleibler=0.0027577295245970745, dist_bray=0.36768469100587375, correl_spearman=0.11888442695505624]	[dist_kullbackleibler, dist_bray, correl_spearman]
13110	13023	Undirected	104	OTU-OTU82->OTU-OTU3		0.5	13477	OTU-OTU82->OTU-OTU3		OTU-OTU82->OTU-OTU3	FALSE		5.6e-05	0.000286	[0.019758512413328922]	3	[0.02220668446468897]	[correl_spearman=copresence, dist_bray=copresence, dist_kullbackleibler=copresence]	[correl_spearman=0.5016597560487728	[correl_spearman	0.50166	[0.5024580610318375, 0.5275378230760158, 4.436666318363664]	[0.1477242319063074]	[0.5016597560487728, 0.5333475311712521, 4.731115230579904]	[0.5134345588932433, 0.5294929066056293, 4.059906865092013]	copresence	[0.5016597560487728]	[68.0, 68.0, 68.0]	[0.13473612253604264, 0.09955912760346952, 1.63506050748174]	5.6e-05	[correl_spearman=0.09537595474595423, dist_bray=0.22674293156967595, dist_kullbackleibler=3.8480900767856596E-5]	[correl_spearman, dist_bray, dist_kullbackleibler]
13110	12861	Undirected	105	OTU-OTU82->OTU-OTU4		0.4	13476	OTU-OTU82->OTU-OTU4		OTU-OTU82->OTU-OTU4	FALSE		0.000356	0.001501	[0.7396351155915184]	3	[0.7352754872575624]	[dist_bray=copresence, correl_spearman=copresence, dist_kullbackleibler=copresence]	[dist_bray=0.6167568954578317	correl_spearman	0.403959	[0.613393065171198, 0.38150936087713205, 4.383985802113524]	[0.06061630627251934]	[0.6167568954578317, 0.40395889755800446, 4.371332802311606]	[0.6178268692838182, 0.381421571419325, 4.234419794961763]	copresence	[0.6167568954578317]	[96.0, 96.0, 96.0]	[0.08125553477674821, 0.1386498455194343, 1.1131441462238063]	0.000356	[dist_bray=0.33447946248487803, correl_spearman=0.14285007588017895, dist_kullbackleibler=1.3147019802928206E-4]	[dist_bray, correl_spearman, dist_kullbackleibler]
13110	12777	Undirected	107	OTU-OTU82->OTU-OTU13		0.42	13276	OTU-OTU82->OTU-OTU13		OTU-OTU82->OTU-OTU13	FALSE		0.004399	0.014372	[0.7016144754028046]	3	[0.6967887165664933]	[dist_bray=mutualExclusion, dist_kullbackleibler=mutualExclusion, correl_spearman=mutualExclusion]	[dist_bray=0.8147535435128981	correl_spearman	-0.417364	[0.8047028598223117, 10.437057566306372, -0.4095017879645864]	[0.0611014592556029]	[0.8147535435128981, 10.647402941434068, -0.41736408274676073]	[0.8095801899720343, 10.287933031373342, -0.4195183894207043]	mutualExclusion	[0.8147535435128981]	[96.0, 96.0, 96.0]	[0.06522132556896623, 1.7835900867939678, 0.127510208296034]	0.004399	[dist_bray=0.3363098716814499, dist_kullbackleibler=0.002369218000117579, correl_spearman=0.13558087547876663]	[dist_bray, dist_kullbackleibler, correl_spearman]
13110	12955	Undirected	109	OTU-OTU82->OTU-OTU15		0.51	13274	OTU-OTU82->OTU-OTU15		OTU-OTU82->OTU-OTU15	FALSE		0	1e-06	[0.7377531494982698]	3	[0.7404316246202154]	[dist_bray=copresence, correl_spearman=copresence, dist_kullbackleibler=copresence]	[dist_bray=0.6045134687160048	correl_spearman	0.507521	[0.5842497684602105, 0.5057970170901285, 3.710105828018369]	[0.0682569564370571]	[0.6045134687160048, 0.5075211299438576, 3.9265677765189784]	[0.5722087739059728, 0.5019967121746323, 3.6464544015090707]	copresence	[0.6045134687160048]	[84.0, 84.0, 84.0]	[0.07742421029588424, 0.12024955815403705, 0.9628903533764159]	0	[dist_bray=0.2872977780682189, correl_spearman=0.0676239874328809, dist_kullbackleibler=4.614114312850859E-8]	[dist_bray, correl_spearman, dist_kullbackleibler]
13110	12875	Undirected	110	OTU-OTU82->OTU-OTU16		0.59	13273	OTU-OTU82->OTU-OTU16		OTU-OTU82->OTU-OTU16	FALSE		0	1e-06	[9.882380072994543]	3	[9.576339016651566]	[dist_kullbackleibler=copresence, dist_bray=copresence, correl_spearman=copresence]	[dist_kullbackleibler=3.8473461636156845	correl_spearman	0.594963	[3.7457394273453457, 0.554770466523827, 0.5864213941935847]	[1.9271658685454334]	[3.8473461636156845, 0.5893097750925498, 0.5949632901177588]	[3.538035016273226, 0.5659179591487569, 0.6016223136654205]	copresence	[3.8473461636156845]	[96.0, 96.0, 96.0]	[1.2540793414891651, 0.0769080755814851, 0.1205887254451958]	0	[dist_kullbackleibler=9.618779106546071E-8, dist_bray=0.22770226784333714, correl_spearman=0.04687308355208164]	[dist_kullbackleibler, dist_bray, correl_spearman]
13110	12770	Undirected	111	OTU-OTU82->OTU-OTU18		0.49	13272	OTU-OTU82->OTU-OTU18		OTU-OTU82->OTU-OTU18	FALSE		0	2e-06	[0.7634887435836395]	3	[0.7569301713807879]	[dist_bray=copresence, dist_kullbackleibler=copresence, correl_spearman=copresence]	[dist_bray=0.5750064878476387	correl_spearman	0.485686	[0.5568865549041687, 3.8019807909475736, 0.47480594793324726]	[0.0665859567865786]	[0.5750064878476387, 3.8323637744474888, 0.4856860855760494]	[0.565655141800812, 3.620475461373074, 0.49487219759034595]	copresence	[0.5750064878476387]	[80.0, 80.0, 80.0]	[0.07246361681434607, 1.0199206417229039, 0.1288594361960847]	0	[dist_bray=0.22870154100558682, dist_kullbackleibler=1.4467872189172226E-7, correl_spearman=0.0961455117722197]	[dist_bray, dist_kullbackleibler, correl_spearman]
13110	12808	Undirected	112	OTU-OTU82->OTU-OTU21		0.55	13253	OTU-OTU82->OTU-OTU21		OTU-OTU82->OTU-OTU21	FALSE		0	0	[10.183178737287033]	3	[9.991483717672514]	[dist_kullbackleibler=copresence, correl_spearman=copresence, dist_bray=copresence]	[dist_kullbackleibler=3.8562933850524304	correl_spearman	0.55389	[3.629216825585209, 0.5521918754532295, 0.5596052725969674]	[1.5971495179049688]	[3.8562933850524304, 0.5538903241514681, 0.5768169464462731]	[3.4758054642853127, 0.561891172868342, 0.5640686576601852]	copresence	[3.8562933850524304]	[72.0, 72.0, 72.0]	[0.9762652097428375, 0.11795905092265078, 0.07033967440798304]	0	[dist_kullbackleibler=6.007550013009677E-11, correl_spearman=0.05124257510276514, dist_bray=0.22909271482697824]	[dist_kullbackleibler, correl_spearman, dist_bray]
13110	12847	Undirected	113	OTU-OTU82->OTU-OTU27		0.41	13252	OTU-OTU82->OTU-OTU27		OTU-OTU82->OTU-OTU27	FALSE		1e-05	5.7e-05	[-0.005647033987755961]	3	[0.009825839138695372]	[correl_spearman=copresence, dist_kullbackleibler=copresence, dist_bray=copresence]	[correl_spearman=0.40957708817113486	[correl_spearman	0.409577	[0.40262101289774704, 4.444597085164197, 0.5886035567809049]	[0.15147563480279672]	[0.40957708817113486, 4.568720703940827, 0.6135033833411652]	[0.4157960762513217, 4.361519276548116, 0.6017641764524166]	copresence	[0.40957708817113486]	[90.0, 90.0, 90.0]	[0.14735988266257227, 1.1130780372190658, 0.06171068651637175]	1e-05	[correl_spearman=0.15309774894796213, dist_kullbackleibler=3.109693357705723E-6, dist_bray=0.27327033833148495]	[correl_spearman, dist_kullbackleibler, dist_bray]
13110	12833	Undirected	115	OTU-OTU82->OTU-OTU36		0.52	13228	OTU-OTU82->OTU-OTU36		OTU-OTU82->OTU-OTU36	FALSE		0.000278	0.001207	[6.84887194805366]	3	[6.877832693424388]	[dist_kullbackleibler=copresence, correl_spearman=copresence, dist_bray=copresence]	[dist_kullbackleibler=3.346999307677165	correl_spearman	0.516084	[3.2875206979627163, 0.5071050835136801, 0.49524893285662847]	[1.313854058333065]	[3.346999307677165, 0.5160843824366165, 0.5084156748209905]	[3.1378306533263824, 0.5334351444584522, 0.4907009456466674]	copresence	[3.346999307677165]	[96.0, 96.0, 96.0]	[1.0805021190387978, 0.13292971723984445, 0.061669391045979835]	0.000278	[dist_kullbackleibler=2.761927520920082E-4, correl_spearman=0.07313834478979647, dist_bray=0.23626025420854502]	[dist_kullbackleibler, correl_spearman, dist_bray]
13110	12830	Undirected	116	OTU-OTU82->OTU-OTU38		0.41	13227	OTU-OTU82->OTU-OTU38		OTU-OTU82->OTU-OTU38	FALSE		0.015328	0.043838	[5.191637756896299]	3	[5.2644292246467685]	[dist_kullbackleibler=copresence, correl_spearman=copresence, dist_bray=copresence]	[dist_kullbackleibler=3.4961008502266204	correl_spearman	0.411438	[3.418377348609475, 0.4026408181189649, 0.5556465655799718]	[0.6114413565249056]	[3.4961008502266204, 0.41143798913564716, 0.5603913569849599]	[3.4659544211277202, 0.4149418167066308, 0.554380530384805]	copresence	[3.4961008502266204]	[96.0, 96.0, 96.0]	[0.6914261173810324, 0.11674429859791186, 0.05926950681795585]	0.015328	[dist_kullbackleibler=0.013206254805543383, correl_spearman=0.09899821601646192, dist_bray=0.3649487123302778]	[dist_kullbackleibler, correl_spearman, dist_bray]
13110	12817	Undirected	117	OTU-OTU82->OTU-OTU40		0.23	13211	OTU-OTU82->OTU-OTU40		OTU-OTU82->OTU-OTU40	FALSE		0.005912	0.018705	[0.8187160414821767]	3	[0.80895331314917]	[dist_bray=mutualExclusion, dist_kullbackleibler=mutualExclusion, correl_spearman=mutualExclusion]	[dist_bray=0.9216704306213566	correl_spearman	-0.229836	[0.9192115065137225, 14.088411687232762, -0.23068549107530387]	[0.07527503000728387]	[0.9216704306213566, 14.440916822218307, -0.22983598896429264]	[0.9231681755218841, 14.24397607672837, -0.21747028294507137]	mutualExclusion	[0.9216704306213566]	[96.0, 96.0, 96.0]	[0.046031450265194174, 1.704966206812285, 0.16363510183750313]	0.005912	[dist_bray=0.3036589162405905, dist_kullbackleibler=0.0017290248078093429, correl_spearman=0.29082379402297254]	[dist_bray, dist_kullbackleibler, correl_spearman]
13110	12766	Undirected	118	OTU-OTU82->OTU-OTU42		0.4	13210	OTU-OTU82->OTU-OTU42		OTU-OTU82->OTU-OTU42	FALSE		0.001049	0.003939	[7.583824251169707]	3	[7.661200872456825]	[dist_kullbackleibler=copresence, correl_spearman=copresence, dist_bray=copresence]	[dist_kullbackleibler=4.161417349441518	correl_spearman	0.401507	[4.076568219601021, 0.4006261929796083, 0.514544899348091]	[1.4036583452220344]	[4.161417349441518, 0.4015069141618509, 0.514509134984227]	[4.073473507638729, 0.42406078593236757, 0.5194962093719087]	copresence	[4.161417349441518]	[96.0, 96.0, 96.0]	[1.2016161516470145, 0.1500975737148536, 0.0741303842335511]	0.001049	[dist_kullbackleibler=5.375367063964465E-4, correl_spearman=0.14576961713696868, dist_bray=0.267201767440004]	[dist_kullbackleibler, correl_spearman, dist_bray]
13110	12767	Undirected	119	OTU-OTU82->OTU-OTU43		0.6	13209	OTU-OTU82->OTU-OTU43		OTU-OTU82->OTU-OTU43	FALSE		1e-06	5e-06	[0.012843578682360066]	3	[0.009135389044259593]	[correl_spearman=copresence, dist_kullbackleibler=copresence, dist_bray=copresence]	[correl_spearman=0.6024233336189269	[correl_spearman	0.602423	[0.6038708038673192, 3.0024730033840044, 0.46192091802203705]	[0.13059954789844364]	[0.6024233336189269, 3.182158635686929, 0.46952992294483975]	[0.6199499248148558, 2.8174779791877445, 0.4601989271194118]	copresence	[0.6024233336189269]	[94.0, 94.0, 94.0]	[0.13128744554552849, 1.089600164113464, 0.0607593022619977]	1e-06	[correl_spearman=0.05035807835389294, dist_kullbackleibler=9.796962352481842E-7, dist_bray=0.1757495281550917]	[correl_spearman, dist_kullbackleibler, dist_bray]
13110	12810	Undirected	120	OTU-OTU82->OTU-OTU45		0.49	13208	OTU-OTU82->OTU-OTU45		OTU-OTU82->OTU-OTU45	FALSE		0.000457	0.001872	[0.7140408773412775]	3	[0.7066565559404684]	[dist_bray=copresence, correl_spearman=copresence, dist_kullbackleibler=copresence]	[dist_bray=0.5743191783462326	correl_spearman	0.491322	[0.5625014925640882, 0.4864681364921953, 4.201735804241355]	[0.06148222180044025]	[0.5743191783462326, 0.4913223827404023, 4.349821627325069]	[0.5647547395793172, 0.5284096130723368, 3.9321152715720746]	copresence	[0.5743191783462326]	[96.0, 96.0, 96.0]	[0.06711975473730745, 0.15189055354238795, 1.3451782349933357]	0.000457	[dist_bray=0.2889610140078748, correl_spearman=0.10813006385162455, dist_kullbackleibler=2.651305110195068E-4]	[dist_bray, correl_spearman, dist_kullbackleibler]
13110	12779	Undirected	121	OTU-OTU82->OTU-OTU61		0.54	13173	OTU-OTU82->OTU-OTU61		OTU-OTU82->OTU-OTU61	FALSE		1.3e-05	7.7e-05	[7.507889579288451]	3	[7.556054101228569]	[dist_kullbackleibler=copresence, correl_spearman=copresence, dist_bray=copresence]	[dist_kullbackleibler=3.346522807264225	correl_spearman	0.538937	[3.262498004203709, 0.5365846283505069, 0.5215979355676085]	[1.5699708632747937]	[3.346522807264225, 0.5389366038770966, 0.5278865480120061]	[3.1736899152080014, 0.546505150624603, 0.5225771689573238]	copresence	[3.346522807264225]	[96.0, 96.0, 96.0]	[1.02826047844389, 0.12482488531830174, 0.059418885661681874]	1.3e-05	[dist_kullbackleibler=1.147122240685583E-5, correl_spearman=0.058018060644678626, dist_bray=0.27278594967269587]	[dist_kullbackleibler, correl_spearman, dist_bray]
13110	12769	Undirected	122	OTU-OTU82->OTU-OTU70		0.33	13157	OTU-OTU82->OTU-OTU70		OTU-OTU82->OTU-OTU70	FALSE		0.006174	0.019471	[0.719449175268647]	3	[0.7145067040249136]	[dist_bray=copresence, dist_kullbackleibler=copresence, correl_spearman=copresence]	[dist_bray=0.6434102841295761	correl_spearman	0.332543	[0.6341055425020097, 5.07312022468273, 0.3326347878112223]	[0.06649413859901637]	[0.6434102841295761, 5.255664193687706, 0.332543045285124]	[0.6359017095970704, 4.986562784770362, 0.3496586956305216]	copresence	[0.6434102841295761]	[96.0, 96.0, 96.0]	[0.06863593943354368, 1.2384679490679438, 0.14904965935329798]	0.006174	[dist_bray=0.37946252993858165, dist_kullbackleibler=0.0020877632707849703, correl_spearman=0.2028215186128947]	[dist_bray, dist_kullbackleibler, correl_spearman]
13110	12839	Undirected	123	OTU-OTU82->OTU-OTU72		0.38	13156	OTU-OTU82->OTU-OTU72		OTU-OTU82->OTU-OTU72	FALSE		0.009511	0.02855	[-0.032697998478399395]	3	[-0.025842825076474497]	[correl_spearman=copresence, dist_bray=copresence, dist_kullbackleibler=copresence]	[correl_spearman=0.37803172236601923	[correl_spearman	0.378032	[0.37296073733633783, 0.6158150626056146, 5.2499661322298765]	[0.15596375985224262]	[0.37803172236601923, 0.6182767859028562, 5.481485872708641]	[0.3879679597574189, 0.6246523819509773, 5.151543778157287]	copresence	[0.37803172236601923]	[96.0, 96.0, 96.0]	[0.15635932149130705, 0.0691626767490807, 1.3794110829807458]	0.009511	[correl_spearman=0.15659541181275816, dist_bray=0.3676999881622486, dist_kullbackleibler=0.004659552046963444]	[correl_spearman, dist_bray, dist_kullbackleibler]
13110	12837	Undirected	124	OTU-OTU82->OTU-OTU77		0.54	13154	OTU-OTU82->OTU-OTU77		OTU-OTU82->OTU-OTU77	FALSE		1e-06	5e-06	[0.805624235192801]	3	[0.7971160740149348]	[dist_bray=copresence, correl_spearman=copresence, dist_kullbackleibler=copresence]	[dist_bray=0.46583921568842324	correl_spearman	0.541053	[0.4810839177049859, 0.5076871603977481, 4.444815326126176]	[0.07734984536110509]	[0.46583921568842324, 0.5410533306634494, 4.242909530650651]	[0.4871418076721743, 0.500694917924944, 4.239370529858479]	copresence	[0.46583921568842324]	[52.0, 52.0, 52.0]	[0.10473186249370942, 0.13854849089575624, 1.6810865193993525]	1e-06	[dist_bray=0.1643974522879179, correl_spearman=0.0912153166259263, dist_kullbackleibler=4.878483164105774E-7]	[dist_bray, correl_spearman, dist_kullbackleibler]
13110	12795	Undirected	125	OTU-OTU82->OTU-OTU81		0.44	13137	OTU-OTU82->OTU-OTU81		OTU-OTU82->OTU-OTU81	FALSE		0.000471	0.001918	[8.430039296373547]	3	[8.620745519355948]	[dist_kullbackleibler=copresence, dist_bray=copresence, correl_spearman=copresence]	[dist_kullbackleibler=4.919608928910371	correl_spearman	0.435131	[4.717485099455251, 0.5945790167492239, 0.4359410168392929]	[2.0595978732397633]	[4.919608928910371, 0.6172990238791328, 0.43513101887902045]	[4.534616837737447, 0.601039546517486, 0.4572739923229594]	copresence	[4.919608928910371]	[96.0, 96.0, 96.0]	[1.2371048184401012, 0.0786404264219215, 0.14281336616593093]	0.000471	[dist_kullbackleibler=2.2461809581519887E-4, dist_bray=0.3300385615285719, correl_spearman=0.11560533200794326]	[dist_kullbackleibler, dist_bray, correl_spearman]
13110	12824	Undirected	126	OTU-OTU82->OTU-OTU85		0.5	13134	OTU-OTU82->OTU-OTU85		OTU-OTU82->OTU-OTU85	FALSE		0.000351	0.001484	[0.7041937178392086]	3	[0.6977156096275544]	[dist_bray=copresence, correl_spearman=copresence, dist_kullbackleibler=copresence]	[dist_bray=0.6269244768172495	correl_spearman	0.496512	[0.6110784636622085, 0.4893919085691915, 3.8743536251705843]	[0.056654487067203003]	[0.6269244768172495, 0.49651192385636483, 3.9753652814972438]	[0.6176721510557701, 0.49314061806335774, 3.7581072462405007]	copresence	[0.6269244768172495]	[96.0, 96.0, 96.0]	[0.06487508861759998, 0.11220948176564698, 1.121872733426692]	0.000351	[dist_bray=0.3668733537344109, correl_spearman=0.06549675591060611, dist_kullbackleibler=2.570342186638541E-4]	[dist_bray, correl_spearman, dist_kullbackleibler]
13110	12822	Undirected	128	OTU-OTU82->OTU-OTU87		0.33	13132	OTU-OTU82->OTU-OTU87		OTU-OTU82->OTU-OTU87	FALSE		0.003911	0.012944	[0.7144824546858204]	3	[0.7053533565186383]	[dist_bray=copresence, correl_spearman=copresence, dist_kullbackleibler=copresence]	[dist_bray=0.6425606877200469	correl_spearman	0.329537	[0.6207351185747417, 0.3259406370756882, 4.081313432397342]	[0.05906492620925675]	[0.6425606877200469, 0.32953732043872086, 4.186274781396622]	[0.6177029093328372, 0.3518442541993039, 3.966774559144882]	copresence	[0.6425606877200469]	[96.0, 96.0, 96.0]	[0.05741380522059941, 0.14990030323079118, 1.0640629208102153]	0.003911	[dist_bray=0.36198903097182766, correl_spearman=0.2121418434201479, dist_kullbackleibler=0.001226667054877506]	[dist_bray, correl_spearman, dist_kullbackleibler]
13110	12819	Undirected	129	OTU-OTU82->OTU-OTU89		0.54	13131	OTU-OTU82->OTU-OTU89		OTU-OTU82->OTU-OTU89	FALSE		0	0	[0.7467719654790861]	3	[0.7471972465221021]	[dist_bray=copresence, correl_spearman=copresence, dist_kullbackleibler=copresence]	[dist_bray=0.5489152077931791	correl_spearman	0.541017	[0.5215042603881082, 0.5456306535940185, 3.546663968773469]	[0.07054368944291001]	[0.5489152077931791, 0.5410173139660612, 3.799719965115942]	[0.5132370064673792, 0.5670159589019248, 3.360790749179868]	copresence	[0.5489152077931791]	[28.0, 28.0, 28.0]	[0.05612987289295932, 0.10632416201071888, 0.8438604908111705]	0	[dist_bray=0.17039057616599318, correl_spearman=0.04270055783234128, dist_kullbackleibler=1.984734598892146E-11]	[dist_bray, correl_spearman, dist_kullbackleibler]
13110	13115	Undirected	130	OTU-OTU82->OTU-OTU93		0.45	13116	OTU-OTU82->OTU-OTU93		OTU-OTU82->OTU-OTU93	FALSE		0.002471	0.008522	[-0.019336155703214265]	3	[-0.016593689676011898]	[correl_spearman=mutualExclusion, dist_kullbackleibler=mutualExclusion, dist_bray=mutualExclusion]	[correl_spearman=-0.4492251948232666	[correl_spearman	-0.449225	[-0.4447931321144341, 9.061190274923502, 0.8014648942075666]	[0.13301155059055855]	[-0.4492251948232666, 9.346549772004673, 0.8115521070037556]	[-0.437257896581956, 9.05377759372897, 0.8088733823442243]	mutualExclusion	[-0.4492251948232666]	[96.0, 96.0, 96.0]	[0.1296054702052407, 1.076853184508565, 0.06032969099397255]	0.002471	[correl_spearman=0.11713765102872142, dist_kullbackleibler=0.0013770855431116669, dist_bray=0.3437134367824024]	[correl_spearman, dist_kullbackleibler, dist_bray]
13110	12798	Undirected	133	OTU-OTU82->OTU-OTU98		0.22	13112	OTU-OTU82->OTU-OTU98		OTU-OTU82->OTU-OTU98	FALSE		0.017429	0.048968	[0.901783979983439]	3	[0.8876192611691325]	[dist_bray=mutualExclusion, dist_kullbackleibler=mutualExclusion, correl_spearman=mutualExclusion]	[dist_bray=0.9351739120311486	correl_spearman	-0.22187	[0.9355048852702996, 18.083396081571248, -0.22819597333134733]	[0.06247895927462501]	[0.9351739120311486, 19.086183294260113, -0.2218699080663142]	[0.9431282111123246, 18.557312486895885, -0.21607004978304353]	mutualExclusion	[0.9351739120311486]	[82.0, 82.0, 82.0]	[0.049813538082814315, 2.512947217839903, 0.15321439726194636]	0.017429	[dist_bray=0.4150585241548401, dist_kullbackleibler=0.004805653287308309, correl_spearman=0.2798358462276478]	[dist_bray, dist_kullbackleibler, correl_spearman]
13110	12796	Undirected	134	OTU-OTU82->OTU-OTU99		0.53	13111	OTU-OTU82->OTU-OTU99		OTU-OTU82->OTU-OTU99	FALSE		1.4e-05	7.9e-05	[0.7265647712652618]	3	[0.7230398807018621]	[dist_bray=copresence, correl_spearman=copresence, dist_kullbackleibler=copresence]	[dist_bray=0.5382861192529714	correl_spearman	0.532734	[0.5237636035358314, 0.5310581951469223, 4.105064663198608]	[0.0620401423317394]	[0.5382861192529714, 0.5327342644141047, 4.346252769330252]	[0.5289525000809661, 0.5388811057216227, 4.063572110386063]	copresence	[0.5382861192529714]	[88.0, 88.0, 88.0]	[0.06196452916263059, 0.13063749585421627, 1.3092438604100656]	1.4e-05	[dist_bray=0.2116984719492776, correl_spearman=0.07265375130843366, dist_kullbackleibler=1.2239169299044228E-5]	[dist_bray, correl_spearman, dist_kullbackleibler]
13104	12787	Undirected	135	OTU-OTU59->OTU-OTU110		0.55	13506	OTU-OTU59->OTU-OTU110		OTU-OTU59->OTU-OTU110	FALSE		0.000404	0.001677	[8.158085079861834]	3	[8.198630206125973]	[dist_kullbackleibler=mutualExclusion, correl_spearman=mutualExclusion, dist_bray=mutualExclusion]	[dist_kullbackleibler=12.325730045012046	correl_spearman	-0.54881	[11.893612964932744, -0.5464972306213072, 0.9053103433650516]	[1.324922849078897]	[12.325730045012046, -0.5488101286931945, 0.9181030773704997]	[11.846517357983178, -0.5453581661323095, 0.9040299690503002]	mutualExclusion	[12.325730045012046]	[4.0, 4.0, 4.0]	[1.3497572617262632, 0.10135939583282381, 0.037968484837436804]	0.000404	[dist_kullbackleibler=7.353067564841442E-4, correl_spearman=0.0485939666624563, dist_bray=0.2021083137386036]	[dist_kullbackleibler, correl_spearman, dist_bray]
13104	12862	Undirected	136	OTU-OTU59->OTU-OTU112		0.53	13505	OTU-OTU59->OTU-OTU112		OTU-OTU59->OTU-OTU112	FALSE		0	0	[10.165432266206466]	3	[10.357045142243738]	[dist_kullbackleibler=copresence, dist_bray=copresence, correl_spearman=copresence]	[dist_kullbackleibler=3.5396620785129853	correl_spearman	0.532611	[3.5129128741585665, 0.5597238735562328, 0.5131228729373647]	[2.0607843113027013]	[3.5396620785129853, 0.5593644632217121, 0.5326109948501468]	[3.464470223639096, 0.578803453681684, 0.5208730922278646]	copresence	[3.5396620785129853]	[4.0, 4.0, 4.0]	[0.8145045385855382, 0.09535191632394276, 0.11059140933981952]	0	[dist_kullbackleibler=1.687538997430238E-14, dist_bray=0.23219537301249138, correl_spearman=0.06537389805915395]	[dist_kullbackleibler, dist_bray, correl_spearman]
13104	12895	Undirected	137	OTU-OTU59->OTU-OTU25		0.46	13342	OTU-OTU59->OTU-OTU25		OTU-OTU59->OTU-OTU25	FALSE		2e-06	1.2e-05	[10.455133864011227]	3	[10.367811243395444]	[dist_kullbackleibler=copresence, correl_spearman=copresence, dist_bray=copresence]	[dist_kullbackleibler=5.245045335543894	correl_spearman	0.460498	[4.902445743796785, 0.45683112281041754, 0.6212530091361573]	[2.0182073451905698]	[5.245045335543894, 0.46049778724572815, 0.6249273285510288]	[4.601496477344456, 0.441832264791015, 0.6260644808254684]	copresence	[5.245045335543894]	[4.0, 4.0, 4.0]	[1.3023535438012572, 0.11482200414669817, 0.07497103735642344]	2e-06	[dist_kullbackleibler=8.376154625455712E-7, correl_spearman=0.08798570904092168, dist_bray=0.28198055036890723]	[dist_kullbackleibler, correl_spearman, dist_bray]
13104	12789	Undirected	138	OTU-OTU59->OTU-OTU31		0.6	13321	OTU-OTU59->OTU-OTU31		OTU-OTU59->OTU-OTU31	FALSE		0	3e-06	[8.167948717011143]	3	[8.236517349214765]	[dist_kullbackleibler=copresence, dist_bray=copresence, correl_spearman=copresence]	[dist_kullbackleibler=4.18646206906421	correl_spearman	0.600242	[3.70273965903875, 0.4954220316752559, 0.6023006988139101]	[1.5052989087147892]	[4.18646206906421, 0.5114841078989383, 0.6002417262938206]	[3.7198631320060542, 0.4895881240005838, 0.6046623017466608]	copresence	[4.18646206906421]	[4.0, 4.0, 4.0]	[0.8803253621577252, 0.06469778857673975, 0.119537298659216]	0	[dist_kullbackleibler=6.753998316177956E-7, dist_bray=0.18478145407510338, correl_spearman=0.041335144181584016]	[dist_kullbackleibler, dist_bray, correl_spearman]
13104	12833	Undirected	139	OTU-OTU59->OTU-OTU36		0.35	13317	OTU-OTU59->OTU-OTU36		OTU-OTU59->OTU-OTU36	FALSE		0.0003	0.001292	[-0.011079024164551138]	3	[-0.0058769516417971875]	[correl_spearman=copresence, dist_kullbackleibler=copresence, dist_bray=copresence]	[correl_spearman=0.3511978248240067	[correl_spearman	0.351198	[0.35402668834954104, 4.8731009589941205, 0.6391920223622019]	[0.16389568003816868]	[0.3511978248240067, 5.241102938733479, 0.6578195805516052]	[0.36532309638942834, 4.762924125450704, 0.6475805896117945]	copresence	[0.3511978248240067]	[4.0, 4.0, 4.0]	[0.12447414059417991, 0.9427620250686604, 0.06678939363752741]	0.0003	[correl_spearman=0.15383833339697622, dist_kullbackleibler=8.898972582627174E-5, dist_bray=0.3796368149917546]	[correl_spearman, dist_kullbackleibler, dist_bray]
13104	12767	Undirected	140	OTU-OTU59->OTU-OTU43		0.48	13301	OTU-OTU59->OTU-OTU43		OTU-OTU59->OTU-OTU43	FALSE		4e-06	2.6e-05	[9.321158873650997]	3	[9.367962844465668]	[dist_kullbackleibler=copresence, dist_bray=copresence, correl_spearman=copresence]	[dist_kullbackleibler=4.989535105314907	correl_spearman	0.476253	[4.637154229630508, 0.5859757631877585, 0.46552557065031874]	[1.7326857915750147]	[4.989535105314907, 0.597314523910571, 0.4762529195504327]	[4.550806005502547, 0.5764420620593282, 0.4714668501557674]	copresence	[4.989535105314907]	[4.0, 4.0, 4.0]	[1.0325565498278204, 0.07283318911327961, 0.12651118153805943]	4e-06	[dist_kullbackleibler=1.6149578074831084E-6, dist_bray=0.30623370179878895, correl_spearman=0.10179234621513739]	[dist_kullbackleibler, dist_bray, correl_spearman]
13104	12886	Undirected	141	OTU-OTU59->OTU-OTU54		0.49	13284	OTU-OTU59->OTU-OTU54		OTU-OTU59->OTU-OTU54	FALSE		0.01206	0.035206	[7.415033365676887]	3	[7.1820516220928665]	[dist_kullbackleibler=mutualExclusion, dist_bray=mutualExclusion, correl_spearman=mutualExclusion]	[dist_kullbackleibler=9.849585491807797	correl_spearman	-0.486722	[9.305513658545184, 0.8152753006991067, -0.47954142471755556]	[1.018369622751151]	[9.849585491807797, 0.841397136192391, -0.4867216410324928]	[9.385691473559328, 0.8273286621250734, -0.49445946038327815]	mutualExclusion	[9.849585491807797]	[4.0, 4.0, 4.0]	[0.8445388724295424, 0.05285232250237291, 0.13011334265232938]	0.01206	[dist_kullbackleibler=0.010426022222193243, dist_bray=0.33999842427935834, correl_spearman=0.10064600665927004]	[dist_kullbackleibler, dist_bray, correl_spearman]
13104	12858	Undirected	142	OTU-OTU59->OTU-OTU64		0.37	13259	OTU-OTU59->OTU-OTU64		OTU-OTU59->OTU-OTU64	FALSE		3e-06	2.2e-05	[10.6197891867524]	3	[10.619243573492708]	[dist_kullbackleibler=copresence, dist_bray=copresence, correl_spearman=copresence]	[dist_kullbackleibler=5.656678416024919	correl_spearman	0.373563	[5.658329511775723, 0.6768916304310738, 0.34728011730557723]	[2.0664686929987908]	[5.656678416024919, 0.6578348600507553, 0.37356344419531196]	[5.835361853565569, 0.6896790816158399, 0.3646666139035415]	copresence	[5.656678416024919]	[4.0, 4.0, 4.0]	[1.0740300409850139, 0.08850773166250021, 0.1240636871895137]	3e-06	[dist_kullbackleibler=8.469261195687139E-7, dist_bray=0.3608074100547518, correl_spearman=0.13708017963994035]	[dist_kullbackleibler, dist_bray, correl_spearman]
13104	12849	Undirected	144	OTU-OTU59->OTU-OTU86		0.33	13214	OTU-OTU59->OTU-OTU86		OTU-OTU59->OTU-OTU86	FALSE		2e-06	1.5e-05	[0.0050688345850887565]	3	[0.0024967630927694344]	[correl_spearman=copresence, dist_bray=copresence, dist_kullbackleibler=copresence]	[correl_spearman=0.32918460034019265	[correl_spearman	0.329185	[0.33626015603249837, 0.4614092752999381, 3.627620094232211]	[0.1485139774851049]	[0.32918460034019265, 0.48314425768757396, 3.8826684884117864]	[0.35428766043966664, 0.45619540449841867, 3.36038066806793]	copresence	[0.32918460034019265]	[4.0, 4.0, 4.0]	[0.16190049744634924, 0.08775914910370985, 1.2382119963879423]	2e-06	[correl_spearman=0.20341173003440266, dist_bray=0.14966039291184774, dist_kullbackleibler=9.027840082165284E-7]	[correl_spearman, dist_bray, dist_kullbackleibler]
13104	12822	Undirected	145	OTU-OTU59->OTU-OTU87		0.46	13213	OTU-OTU59->OTU-OTU87		OTU-OTU59->OTU-OTU87	FALSE		5.5e-05	0.000282	[0.7676378240891191]	3	[0.7548568746118783]	[dist_bray=copresence, correl_spearman=copresence, dist_kullbackleibler=copresence]	[dist_bray=0.5446181854126559	correl_spearman	0.460043	[0.5250230608911726, 0.4657607050742456, 4.182484876977873]	[0.06414798201089902]	[0.5446181854126559, 0.4600433591261757, 4.938022270897705]	[0.5164041397270713, 0.4703240059598753, 4.002636903981666]	copresence	[0.5446181854126559]	[4.0, 4.0, 4.0]	[0.07506600040952255, 0.13399892913279188, 1.3982881496697526]	5.5e-05	[dist_bray=0.20077242109342297, correl_spearman=0.08547437192157781, dist_kullbackleibler=4.7735321293651545E-5]	[dist_bray, correl_spearman, dist_kullbackleibler]
13104	12798	Undirected	146	OTU-OTU59->OTU-OTU98		0.23	13196	OTU-OTU59->OTU-OTU98		OTU-OTU59->OTU-OTU98	FALSE		0.004864	0.0157	[]	3	[]	[dist_kullbackleibler=mutualExclusion, correl_spearman=mutualExclusion, dist_bray=mutualExclusion]	[dist_kullbackleibler=19.992389058909545	correl_spearman	-0.229784	[-100.0, -100.0, -100.0]	[]	[19.992389058909545, -0.22978357919004783, 0.9450358007532579]	[-100.0, -100.0, -100.0]	mutualExclusion	[19.992389058909545]	[-10.0, -10.0, -10.0]	[-100.0, -100.0, -100.0]	0.004864	[dist_kullbackleibler=0.00112695199949564, correl_spearman=0.24704871536437, dist_bray=0.4362681507841152]	[dist_kullbackleibler, correl_spearman, dist_bray]
13089	12782	Undirected	147	OTU-OTU9->OTU-OTU10		0.48	13774	OTU-OTU9->OTU-OTU10		OTU-OTU9->OTU-OTU10	FALSE		5.1e-05	0.000263	[9.870284404889059]	3	[9.888399069076518]	[dist_kullbackleibler=copresence, correl_spearman=copresence, dist_bray=copresence]	[dist_kullbackleibler=5.076842482187409	correl_spearman	0.476784	[4.936000452453811, 0.4647596519287961, 0.629463117063726]	[2.276495891789042]	[5.076842482187409, 0.47678388945331635, 0.663335874936549]	[4.716057958715649, 0.4554472896702161, 0.6349286221070078]	copresence	[5.076842482187409]	[86.0, 86.0, 86.0]	[1.4997805172248886, 0.1417323969950097, 0.06756328232661893]	5.1e-05	[dist_kullbackleibler=2.628328269982383E-5, correl_spearman=0.10044438914329229, dist_bray=0.285995654964339]	[dist_kullbackleibler, correl_spearman, dist_bray]
13089	12875	Undirected	148	OTU-OTU9->OTU-OTU16		0.52	13773	OTU-OTU9->OTU-OTU16		OTU-OTU9->OTU-OTU16	FALSE		0	2e-06	[10.998892745470581]	3	[10.531304395625352]	[dist_kullbackleibler=copresence, correl_spearman=copresence, dist_bray=copresence]	[dist_kullbackleibler=4.0388558151105425	correl_spearman	0.52151	[4.090178152850114, 0.5186767787738557, 0.5116674687071804]	[2.5992208296563852]	[4.0388558151105425, 0.5215099715099711, 0.5398898713350209]	[3.8270047667793534, 0.5319672579095852, 0.5116753208307611]	copresence	[4.0388558151105425]	[96.0, 96.0, 96.0]	[1.6356372150356213, 0.13888038372576061, 0.08958481846938575]	0	[dist_kullbackleibler=2.3721160435918875E-7, correl_spearman=0.0754498729119355, dist_bray=0.1751925618287764]	[dist_kullbackleibler, correl_spearman, dist_bray]
13089	12770	Undirected	149	OTU-OTU9->OTU-OTU18		0.44	13770	OTU-OTU9->OTU-OTU18		OTU-OTU9->OTU-OTU18	FALSE		4e-06	2.5e-05	[0.015391780608298936]	3	[-0.0026577919754611963]	[correl_spearman=copresence, dist_kullbackleibler=copresence, dist_bray=copresence]	[correl_spearman=0.4438324718130144	[correl_spearman	0.443832	[0.4397615940825297, 4.422249773149648, 0.5849947277534084]	[0.15116389439797887]	[0.4438324718130144, 4.558173180071318, 0.6113851965697454]	[0.4632416737993702, 4.092015286065341, 0.5803449651683644]	copresence	[0.4438324718130144]	[80.0, 80.0, 80.0]	[0.15533947001894532, 1.4131951748326095, 0.08246772213304207]	4e-06	[correl_spearman=0.13082117027946316, dist_kullbackleibler=1.531352086359128E-6, dist_bray=0.2503780397777312]	[correl_spearman, dist_kullbackleibler, dist_bray]
13089	12808	Undirected	150	OTU-OTU9->OTU-OTU21		0.41	13763	OTU-OTU9->OTU-OTU21		OTU-OTU9->OTU-OTU21	FALSE		0.000146	0.000679	[0.013191580304000288]	3	[0.010473094418148289]	[correl_spearman=copresence, dist_kullbackleibler=copresence, dist_bray=copresence]	[correl_spearman=0.41389494224540124	[correl_spearman	0.413895	[0.4248856811230625, 5.1976657982745955, 0.6048087600959642]	[0.16532224484103428]	[0.41389494224540124, 5.41496648330537, 0.6301193453274909]	[0.4576421241836509, 5.029176451161057, 0.6010214076045564]	copresence	[0.41389494224540124]	[72.0, 72.0, 72.0]	[0.1547349020709594, 1.6791507450206702, 0.07724500639709936]	0.000146	[correl_spearman=0.1460535828949276, dist_kullbackleibler=6.344478007158649E-5, dist_bray=0.25475764415890434]	[correl_spearman, dist_kullbackleibler, dist_bray]
13089	12895	Undirected	151	OTU-OTU9->OTU-OTU25		0.2	13760	OTU-OTU9->OTU-OTU25		OTU-OTU9->OTU-OTU25	FALSE		0.011896	0.034786	[0.8055164406415141]	3	[0.7846065255957372]	[dist_bray=mutualExclusion, dist_kullbackleibler=mutualExclusion, correl_spearman=mutualExclusion]	[dist_bray=0.8440354665613976	correl_spearman	-0.201567	[0.8407975870916249, 13.504359964871332, -0.1899015277039152]	[0.07468083871048299]	[0.8440354665613976, 14.338254824586835, -0.2015669515669514]	[0.8459980778879529, 13.524957830291111, -0.20531095354396975]	mutualExclusion	[0.8440354665613976]	[92.0, 92.0, 92.0]	[0.050034988753758156, 2.0300199778870947, 0.14923148158190963]	0.011896	[dist_bray=0.40082735033069783, dist_kullbackleibler=0.0029538328800921, correl_spearman=0.2964048234554363]	[dist_bray, dist_kullbackleibler, correl_spearman]
13089	12844	Undirected	152	OTU-OTU9->OTU-OTU29		0.43	13757	OTU-OTU9->OTU-OTU29		OTU-OTU9->OTU-OTU29	FALSE		4e-06	2.7e-05	[10.143630595538003]	3	[10.27743306694287]	[dist_kullbackleibler=copresence, dist_bray=copresence, correl_spearman=copresence]	[dist_kullbackleibler=3.878742778007105	correl_spearman	0.425333	[4.031537114268384, 0.36606852555138636, 0.4296381920929047]	[2.461241789545604]	[3.878742778007105, 0.3517394924363182, 0.4253334303307396]	[3.7185028683381676, 0.3475531621717339, 0.43955215226366456]	copresence	[3.878742778007105]	[88.0, 88.0, 88.0]	[1.9498379284735348, 0.12929412897153342, 0.1419953950326074]	4e-06	[dist_kullbackleibler=3.8571225724481906E-6, dist_bray=0.11172065729624858, correl_spearman=0.1253997457266381]	[dist_kullbackleibler, dist_bray, correl_spearman]
13089	12833	Undirected	153	OTU-OTU9->OTU-OTU36		0.43	13744	OTU-OTU9->OTU-OTU36		OTU-OTU9->OTU-OTU36	FALSE		0.003747	0.012462	[7.282042675484536]	3	[7.482520032728538]	[dist_kullbackleibler=copresence, dist_bray=copresence, correl_spearman=copresence]	[dist_kullbackleibler=4.496666716292783	correl_spearman	0.433744	[4.236380733169119, 0.5912503928216977, 0.4361235781771838]	[1.7858159836871126]	[4.496666716292783, 0.6183023531796312, 0.433743835927331]	[4.013641105973331, 0.5947305574354819, 0.4451858260391459]	copresence	[4.496666716292783]	[100.0, 100.0, 100.0]	[1.3725318159224764, 0.06371879836944593, 0.1442491965719091]	0.003747	[dist_kullbackleibler=0.0027958962796521547, dist_bray=0.29881294685505355, correl_spearman=0.10730385247733981]	[dist_kullbackleibler, dist_bray, correl_spearman]
13089	12819	Undirected	155	OTU-OTU9->OTU-OTU89		0.48	13659	OTU-OTU9->OTU-OTU89		OTU-OTU9->OTU-OTU89	FALSE		4e-06	2.3e-05	[0.7912650338820016]	3	[0.7830401061252578]	[dist_bray=copresence, dist_kullbackleibler=copresence, correl_spearman=copresence]	[dist_bray=0.660239604208243	correl_spearman	0.478676	[0.6219822535743118, 4.652674181951793, 0.4877566636156702]	[0.06528051307212637]	[0.660239604208243, 4.810253543732978, 0.47867640833879205]	[0.6290347162515231, 4.5119805087780716, 0.4972686697764229]	copresence	[0.660239604208243]	[28.0, 28.0, 28.0]	[0.08373451688041567, 1.3988273053645532, 0.13226316148324144]	4e-06	[dist_bray=0.2889063138526342, dist_kullbackleibler=1.5192684761355935E-6, correl_spearman=0.1008947161300145]	[dist_bray, dist_kullbackleibler, correl_spearman]
13089	12796	Undirected	156	OTU-OTU9->OTU-OTU99		0.52	13642	OTU-OTU9->OTU-OTU99		OTU-OTU9->OTU-OTU99	FALSE		0.000341	0.00145	[-0.0022792022792022778]	3	[-0.011529914529914522]	[correl_spearman=copresence, dist_kullbackleibler=copresence, dist_bray=copresence]	[correl_spearman=0.5247863247863244	[correl_spearman	0.524786	[0.5295420757746295, 5.30367002118426, 0.6180664084158269]	[0.1732558005678844]	[0.5247863247863244, 5.612981892088484, 0.6569612951231547]	[0.5492346051320931, 5.259801121062734, 0.6404969469190256]	copresence	[0.5247863247863244]	[88.0, 88.0, 88.0]	[0.12973210076743844, 1.5439933954542955, 0.09902491768506556]	0.000341	[correl_spearman=0.06652113864511022, dist_kullbackleibler=2.7314344734730156E-4, dist_bray=0.3299618768706347]	[correl_spearman, dist_kullbackleibler, dist_bray]
13066	13046	Undirected	158	OTU-OTU41->OTU-OTU33		0.4	13547	OTU-OTU41->OTU-OTU33		OTU-OTU41->OTU-OTU33	FALSE		1.4e-05	7.9e-05	[-0.005399501080465663]	3	[-0.0015233342423263756]	[correl_spearman=copresence, dist_bray=copresence, dist_kullbackleibler=copresence]	[correl_spearman=0.3951084915630749	[correl_spearman	0.395108	[0.4066749535662561, 0.5922382115658735, 4.062365300278215]	[0.14847050013784438]	[0.3951084915630749, 0.6040812518021649, 4.209196346557538]	[0.4174388172322808, 0.5986887368777212, 4.031294753763948]	copresence	[0.3951084915630749]	[100.0, 100.0, 100.0]	[0.1354362899889399, 0.063241048047591, 0.8717341613081026]	1.4e-05	[correl_spearman=0.133675374687393, dist_bray=0.2853621537454698, dist_kullbackleibler=4.947132382082664E-6]	[correl_spearman, dist_bray, dist_kullbackleibler]
13066	12886	Undirected	159	OTU-OTU41->OTU-OTU54		0.37	13521	OTU-OTU41->OTU-OTU54		OTU-OTU41->OTU-OTU54	FALSE		0.017675	0.049541	[-0.0043631865772549485]	3	[-0.0025145379874456984]	[correl_spearman=mutualExclusion, dist_kullbackleibler=mutualExclusion, dist_bray=mutualExclusion]	[correl_spearman=-0.37120648880338253	[correl_spearman	-0.371206	[-0.3816324431830519, 8.332956451260014, 0.8036151406253796]	[0.13896909237601685]	[-0.37120648880338253, 8.439000869013537, 0.8108423097049577]	[-0.37657076370713227, 8.196825263690007, 0.8056365287271463]	mutualExclusion	[-0.37120648880338253]	[100.0, 100.0, 100.0]	[0.12151755694245855, 1.0097496644413462, 0.04144235156195018]	0.017675	[correl_spearman=0.13839383862210763, dist_kullbackleibler=0.012254233707413076, dist_bray=0.3348318575143361]	[correl_spearman, dist_kullbackleibler, dist_bray]
13066	12798	Undirected	160	OTU-OTU41->OTU-OTU98		0.17	13486	OTU-OTU41->OTU-OTU98		OTU-OTU41->OTU-OTU98	FALSE		0.006176	0.019471	[0.9079746050269237]	3	[0.8873113872287439]	[dist_bray=mutualExclusion, correl_spearman=mutualExclusion, dist_kullbackleibler=mutualExclusion]	[dist_bray=0.95603673184792	correl_spearman	-0.173353	[0.94447075692186, -0.18095521477122653, 19.12176842929118]	[0.07027516256937288]	[0.95603673184792, -0.17335267275390964, 20.45242649799345]	[0.9561322010647548, -0.17336647269506755, 19.818257402244093]	mutualExclusion	[0.95603673184792]	[86.0, 86.0, 86.0]	[0.047203941307939465, 0.15915204428138185, 3.037120102489815]	0.006176	[dist_bray=0.3962420158975726, correl_spearman=0.32127662603276697, dist_kullbackleibler=0.0012627747631066555]	[dist_bray, correl_spearman, dist_kullbackleibler]
13066	12802	Undirected	161	OTU-OTU41->OTU-OTU101		0.52	13067	OTU-OTU41->OTU-OTU101		OTU-OTU41->OTU-OTU101	FALSE		0	0	[8.665756353877473]	3	[8.681661052192279]	[dist_kullbackleibler=copresence, correl_spearman=copresence, dist_bray=copresence]	[dist_kullbackleibler=3.356920738154174	correl_spearman	0.522845	[3.321438779865243, 0.5208119469963638, 0.5466315078960173]	[1.505922695769667]	[3.356920738154174, 0.5228454172366622, 0.545996585432203]	[3.20956773733578, 0.5336171974159942, 0.5468579212825371]	copresence	[3.356920738154174]	[100.0, 100.0, 100.0]	[0.8211933232490618, 0.09555610583466387, 0.09028730294073278]	0	[dist_kullbackleibler=1.6586441109467387E-9, correl_spearman=0.055190623546370055, dist_bray=0.25545141220692524]	[dist_kullbackleibler, correl_spearman, dist_bray]
13046	12802	Undirected	162	OTU-OTU33->OTU-OTU101		0.53	13555	OTU-OTU33->OTU-OTU101		OTU-OTU33->OTU-OTU101	FALSE		1e-06	6e-06	[6.7060261723076575]	3	[6.526794679878136]	[dist_kullbackleibler=copresence, dist_bray=copresence, correl_spearman=copresence]	[dist_kullbackleibler=2.5856761058914186	correl_spearman	0.530568	[2.4715837210529132, 0.46199874138729385, 0.5450593988406282]	[1.3155740091533292]	[2.5856761058914186, 0.47481421088892495, 0.5305684749192573]	[2.37735671398796, 0.4655448659444971, 0.5548162757912309]	copresence	[2.5856761058914186]	[100.0, 100.0, 100.0]	[0.701506877689068, 0.052839327302668555, 0.13159733433254542]	1e-06	[dist_kullbackleibler=6.436792118202916E-7, dist_bray=0.24462584682255306, correl_spearman=0.06605708256442605]	[dist_kullbackleibler, dist_bray, correl_spearman]
13046	12798	Undirected	164	OTU-OTU33->OTU-OTU98		0.46	13194	OTU-OTU33->OTU-OTU98		OTU-OTU33->OTU-OTU98	FALSE		1e-06	5e-06	[-0.0380476668889102]	3	[-0.035817214130243503]	[correl_spearman=mutualExclusion, dist_bray=mutualExclusion, dist_kullbackleibler=mutualExclusion]	[correl_spearman=-0.46258136786884396	[correl_spearman	-0.462581	[-0.4523050398645823, 0.9389146654265582, 19.564118359576156]	[0.15552989268296846]	[-0.46258136786884396, 0.953813067013495, 20.537777669466983]	[-0.46044729312125593, 0.953632850638055, 20.121115346748688]	mutualExclusion	[-0.46258136786884396]	[86.0, 86.0, 86.0]	[0.14450475378410205, 0.05444398918289434, 2.1247206518587434]	1e-06	[correl_spearman=0.13662183899801295, dist_bray=0.37007552935199717, dist_kullbackleibler=1.580882574847564E-7]	[correl_spearman, dist_bray, dist_kullbackleibler]
13042	12802	Undirected	165	OTU-OTU39->OTU-OTU101		0.44	13629	OTU-OTU39->OTU-OTU101		OTU-OTU39->OTU-OTU101	FALSE		0.001207	0.004482	[5.232847700930522]	3	[5.218746852588141]	[dist_kullbackleibler=copresence, correl_spearman=copresence, dist_bray=copresence]	[dist_kullbackleibler=2.6552249733808013	correl_spearman	0.441435	[2.5493198392009693, 0.4486999480909815, 0.4364337288532485]	[0.9543653772208288]	[2.6552249733808013, 0.4414347699751701, 0.44147554049832105]	[2.529709781526111, 0.4581117078903445, 0.43994048642512446]	copresence	[2.6552249733808013]	[100.0, 100.0, 100.0]	[0.7083900153648496, 0.1471872346081823, 0.05766991458870018]	0.001207	[dist_kullbackleibler=7.579430145608912E-4, correl_spearman=0.13063237815190082, dist_bray=0.24781462059734416]	[dist_kullbackleibler, correl_spearman, dist_bray]
13042	12814	Undirected	166	OTU-OTU39->OTU-OTU108		0.6	13626	OTU-OTU39->OTU-OTU108		OTU-OTU39->OTU-OTU108	FALSE		9e-05	0.000443	[4.139639883078437]	3	[4.305505187268799]	[dist_kullbackleibler=copresence, dist_bray=copresence, correl_spearman=copresence]	[dist_kullbackleibler=1.572667787500121	correl_spearman	0.596717	[1.582618785233577, 0.28560617721028786, 0.593836238984343]	[0.9025563091946139]	[1.572667787500121, 0.28305159594131113, 0.5967167573540644]	[1.469179016594738, 0.27890624680865356, 0.610879379305628]	copresence	[1.572667787500121]	[100.0, 100.0, 100.0]	[0.6271489429513355, 0.04603407277368743, 0.13213818742383285]	9e-05	[dist_kullbackleibler=2.926858932628118E-4, dist_bray=0.09846350854653019, correl_spearman=0.04841586444253343]	[dist_kullbackleibler, dist_bray, correl_spearman]
13042	12801	Undirected	167	OTU-OTU39->OTU-OTU12		0.62	13613	OTU-OTU39->OTU-OTU12		OTU-OTU39->OTU-OTU12	FALSE		1e-06	4e-06	[6.050912202714164]	3	[6.064641117373953]	[dist_kullbackleibler=copresence, dist_bray=copresence, correl_spearman=copresence]	[dist_kullbackleibler=2.468332447199333	correl_spearman	0.623479	[2.3320800463459332, 0.33634240293562734, 0.6299605742390191]	[1.0361101508810309]	[2.468332447199333, 0.34960888606057616, 0.6234791911139933]	[2.2669635141138045, 0.3285450798010866, 0.6348823446567429]	copresence	[2.468332447199333]	[88.0, 88.0, 88.0]	[0.6786732131676412, 0.059335783813291465, 0.09571502769432835]	1e-06	[dist_kullbackleibler=2.937794135626781E-6, dist_bray=0.09721021612848935, correl_spearman=0.023200866552997024]	[dist_kullbackleibler, dist_bray, correl_spearman]
13042	12955	Undirected	168	OTU-OTU39->OTU-OTU15		0.4	13610	OTU-OTU39->OTU-OTU15		OTU-OTU39->OTU-OTU15	FALSE		0.005906	0.018703	[0.6626867429718455]	3	[0.6611307747704849]	[dist_bray=copresence, correl_spearman=copresence, dist_kullbackleibler=copresence]	[dist_bray=0.527437983149817	correl_spearman	0.404616	[0.515652756951321, 0.38875124610122236, 3.9455544160990175]	[0.0544047079190308]	[0.527437983149817, 0.4046163569094786, 4.168044417005639]	[0.5206363919292909, 0.39156355589247666, 3.996495423219229]	copresence	[0.527437983149817]	[84.0, 84.0, 84.0]	[0.0639623031046107, 0.14175244381665147, 0.9149561548511457]	0.005906	[dist_bray=0.28257065421717775, correl_spearman=0.14904687038395859, dist_kullbackleibler=0.00362121346609523]	[dist_bray, correl_spearman, dist_kullbackleibler]
13042	12895	Undirected	169	OTU-OTU39->OTU-OTU25		0.39	13597	OTU-OTU39->OTU-OTU25		OTU-OTU39->OTU-OTU25	FALSE		0.003981	0.013116	[0.682179822179603]	3	[0.6759296519468162]	[dist_bray=copresence, correl_spearman=copresence, dist_kullbackleibler=copresence]	[dist_bray=0.5657446732369111	correl_spearman	0.387988	[0.5645047091748758, 0.37299727757904005, 3.7087423042919974]	[0.05024418366399665]	[0.5657446732369111, 0.3879878362467565, 3.748620925942196]	[0.5687521674189949, 0.3781689289572743, 3.71829712770325]	copresence	[0.5657446732369111]	[92.0, 92.0, 92.0]	[0.056279071709418114, 0.1312109511116638, 0.7615370801179406]	0.003981	[dist_bray=0.3192891673801821, correl_spearman=0.13237338869125298, dist_kullbackleibler=0.002275606313095979]	[dist_bray, correl_spearman, dist_kullbackleibler]
13042	12789	Undirected	170	OTU-OTU39->OTU-OTU31		0.34	13583	OTU-OTU39->OTU-OTU31		OTU-OTU39->OTU-OTU31	FALSE		0.016817	0.047439	[3.4887903654743515]	3	[3.470488961261052]	[dist_kullbackleibler=copresence, correl_spearman=copresence, dist_bray=copresence]	[dist_kullbackleibler=1.770533108055533	correl_spearman	0.343899	[1.7889564957269237, 0.3421988362555905, 0.4605181203760626]	[0.7541066816401504]	[1.770533108055533, 0.3438993198762815, 0.46543138527203476]	[1.7329536915528672, 0.3515730754778176, 0.46304195529690007]	copresence	[1.770533108055533]	[100.0, 100.0, 100.0]	[0.5064989145302636, 0.15367021835534775, 0.051675798131670336]	0.016817	[dist_kullbackleibler=0.009070187223763071, correl_spearman=0.16575659704346257, dist_bray=0.35537124842062195]	[dist_kullbackleibler, correl_spearman, dist_bray]
13042	12943	Undirected	172	OTU-OTU39->OTU-OTU35		0.7	13581	OTU-OTU39->OTU-OTU35		OTU-OTU39->OTU-OTU35	FALSE		0	0	[-0.11479297743307057]	3	[-0.09762113381889316]	[correl_spearman=copresence, dist_bray=copresence, dist_kullbackleibler=copresence]	[correl_spearman=0.6953456968757875	[correl_spearman	0.695346	[0.6907938693766816, 0.2902974516904892, 0.6710170846689059]	[0.14686494544255058]	[0.6953456968757875, 0.2909159295545486, 0.670306395557361]	[0.6947821407530541, 0.29126820638860773, 0.6790625357393489]	copresence	[0.6953456968757875]	[100.0, 100.0, 100.0]	[0.07965191938803033, 0.04481042441471638, 0.14002154791790622]	0	[correl_spearman=0.002606632456781388, dist_bray=0.18436005821166912, dist_kullbackleibler=1.0811686705913814E-6]	[correl_spearman, dist_bray, dist_kullbackleibler]
13042	12813	Undirected	174	OTU-OTU39->OTU-OTU49		0.67	13565	OTU-OTU39->OTU-OTU49		OTU-OTU39->OTU-OTU49	FALSE		4e-06	2.4e-05	[4.688099297477921]	3	[4.746308220907708]	[dist_kullbackleibler=copresence, dist_bray=copresence, correl_spearman=copresence]	[dist_kullbackleibler=1.5280585502231008	correl_spearman	0.667591	[1.536038812912953, 0.3090835772074813, 0.6549853661184699]	[0.9188474232845703]	[1.5280585502231008, 0.30702148905109594, 0.6675912002691974]	[1.421773020210454, 0.3148765640667568, 0.6717213662897858]	copresence	[1.5280585502231008]	[100.0, 100.0, 100.0]	[0.581490893215827, 0.053632858238631245, 0.1284615347742433]	4e-06	[dist_kullbackleibler=1.2775151019495112E-5, dist_bray=0.1089892328171338, correl_spearman=0.0331281869861762]	[dist_kullbackleibler, dist_bray, correl_spearman]
13042	13000	Undirected	175	OTU-OTU39->OTU-OTU88		0.75	13519	OTU-OTU39->OTU-OTU88		OTU-OTU39->OTU-OTU88	FALSE		0	0	[5.271431991037943]	3	[5.245326097176692]	[dist_kullbackleibler=copresence, dist_bray=copresence, correl_spearman=copresence]	[dist_kullbackleibler=1.3478134855496866	correl_spearman	0.747862	[1.3155789157357254, 0.2588034800876339, 0.7432396510387155]	[0.8202876576408066]	[1.3478134855496866, 0.26482151804503395, 0.7478624448702847]	[1.2641380414525858, 0.25086193892787617, 0.7504967594175758]	copresence	[1.3478134855496866]	[100.0, 100.0, 100.0]	[0.4724270249192101, 0.04992996316870189, 0.0854038063394319]	0	[dist_kullbackleibler=5.408872905121598E-9, dist_bray=0.05984472814987907, correl_spearman=0.0050654932653015905]	[dist_kullbackleibler, dist_bray, correl_spearman]
13042	12798	Undirected	176	OTU-OTU39->OTU-OTU98		0.45	13514	OTU-OTU39->OTU-OTU98		OTU-OTU39->OTU-OTU98	FALSE		0.010161	0.030386	[10.161818222762786]	3	[10.251997814566241]	[dist_kullbackleibler=mutualExclusion, correl_spearman=mutualExclusion, dist_bray=mutualExclusion]	[dist_kullbackleibler=13.299882395112942	correl_spearman	-0.446454	[12.79075594298054, -0.43456270135292874, 0.9268122769159545]	[1.987869242017962]	[13.299882395112942, -0.44645404960262636, 0.9377784089761453]	[13.028150022151582, -0.4352579248871309, 0.9349926097844088]	mutualExclusion	[13.299882395112942]	[86.0, 86.0, 86.0]	[1.0775295327341428, 0.13549468303511325, 0.034608888733587265]	0.010161	[dist_kullbackleibler=0.007228160966418318, correl_spearman=0.11712497225496898, dist_bray=0.34298725298423294]	[dist_kullbackleibler, correl_spearman, dist_bray]
13023	12955	Undirected	177	OTU-OTU3->OTU-OTU15		0.49	13482	OTU-OTU3->OTU-OTU15		OTU-OTU3->OTU-OTU15	FALSE		1e-06	5e-06	[0.7604061971188045]	3	[0.7514785869542154]	[dist_bray=copresence, dist_kullbackleibler=copresence, correl_spearman=copresence]	[dist_bray=0.5572038226914898	correl_spearman	0.491496	[0.5422583359757267, 4.341127155941178, 0.48544303558661533]	[0.07327626119518522]	[0.5572038226914898, 4.385132150201574, 0.49149635141143516]	[0.5500641917736249, 4.320227256376653, 0.5081747101772636]	copresence	[0.5572038226914898]	[64.0, 64.0, 64.0]	[0.08768135859187697, 1.1717298130513352, 0.11726333057664254]	1e-06	[dist_bray=0.2399194530160833, dist_kullbackleibler=4.972094551636275E-7, correl_spearman=0.07434517745599939]	[dist_bray, dist_kullbackleibler, correl_spearman]
13023	12770	Undirected	178	OTU-OTU3->OTU-OTU18		0.5	13479	OTU-OTU3->OTU-OTU18		OTU-OTU3->OTU-OTU18	FALSE		8e-06	4.9e-05	[10.28102542189248]	3	[10.016159411022157]	[dist_kullbackleibler=copresence, dist_bray=copresence, correl_spearman=copresence]	[dist_kullbackleibler=4.7472770973379435	correl_spearman	0.501405	[4.648935660750821, 0.5594654578737772, 0.4850854976231975]	[1.8416456547367968]	[4.7472770973379435, 0.5714675981545324, 0.5014046575779963]	[4.668333331488309, 0.55943839887525, 0.47629779673239536]	copresence	[4.7472770973379435]	[60.0, 60.0, 60.0]	[1.4807185817603676, 0.07780527362931558, 0.12107051297944768]	8e-06	[dist_kullbackleibler=5.150419527089056E-6, dist_bray=0.22766398106749297, correl_spearman=0.09329621371495628]	[dist_kullbackleibler, dist_bray, correl_spearman]
13023	12808	Undirected	179	OTU-OTU3->OTU-OTU21		0.49	13469	OTU-OTU3->OTU-OTU21		OTU-OTU3->OTU-OTU21	FALSE		4.9e-05	0.000255	[10.717362076550192]	3	[10.657229062445865]	[dist_kullbackleibler=copresence, dist_bray=copresence, correl_spearman=copresence]	[dist_kullbackleibler=5.725675303135518	correl_spearman	0.490193	[5.41789953237603, 0.5669346141642857, 0.4832830542647859]	[1.6784987362804147]	[5.725675303135518, 0.5731135551939834, 0.4901931538518903]	[5.428086132887192, 0.5682026042953732, 0.493933327215396]	copresence	[5.725675303135518]	[52.0, 52.0, 52.0]	[1.6970967732689437, 0.09199761274450466, 0.13188330663568024]	4.9e-05	[dist_kullbackleibler=2.8875340310818842E-5, dist_bray=0.2548665756415738, correl_spearman=0.09897465935900662]	[dist_kullbackleibler, dist_bray, correl_spearman]
13023	12833	Undirected	180	OTU-OTU3->OTU-OTU36		0.43	13459	OTU-OTU3->OTU-OTU36		OTU-OTU3->OTU-OTU36	FALSE		0.000445	0.001832	[7.311711173271869]	3	[7.438947163826885]	[dist_kullbackleibler=copresence, correl_spearman=copresence, dist_bray=copresence]	[dist_kullbackleibler=4.18346203136146	correl_spearman	0.428612	[3.9601241928248547, 0.4303384379680537, 0.5803175547492582]	[1.3509528307859473]	[4.18346203136146, 0.4286121595971611, 0.6009326693077975]	[3.9196107621694516, 0.4258220227809866, 0.584788889209908]	copresence	[4.18346203136146]	[68.0, 68.0, 68.0]	[0.9966857482586948, 0.12134438331195788, 0.08138944303933351]	0.000445	[dist_kullbackleibler=2.4643461008821976E-4, correl_spearman=0.10173879298204508, dist_bray=0.3204675068857513]	[dist_kullbackleibler, correl_spearman, dist_bray]
13023	12766	Undirected	181	OTU-OTU3->OTU-OTU42		0.45	13450	OTU-OTU3->OTU-OTU42		OTU-OTU3->OTU-OTU42	FALSE		0.00044	0.001814	[-0.017513200890669364]	3	[0.006526398263502763]	[correl_spearman=copresence, dist_bray=copresence, dist_kullbackleibler=copresence]	[correl_spearman=0.4479080412903387	[correl_spearman	0.447908	[0.44215323172372056, 0.5606802101916375, 4.352591635857442]	[0.1511235451526213]	[0.4479080412903387, 0.5727181983469116, 4.474418657769211]	[0.4477824919423258, 0.5627382505095639, 4.202669469246082]	copresence	[0.4479080412903387]	[68.0, 68.0, 68.0]	[0.12307982490607147, 0.07926352625010498, 1.18903301665898]	0.00044	[correl_spearman=0.10717125674191963, dist_bray=0.2854266242184351, dist_kullbackleibler=2.5949154404769637E-4]	[correl_spearman, dist_bray, dist_kullbackleibler]
13023	12810	Undirected	182	OTU-OTU3->OTU-OTU45		0.53	13449	OTU-OTU3->OTU-OTU45		OTU-OTU3->OTU-OTU45	FALSE		0	0	[8.917059177565646]	3	[9.118170246291752]	[dist_kullbackleibler=copresence, correl_spearman=copresence, dist_bray=copresence]	[dist_kullbackleibler=3.7043640622849128	correl_spearman	0.531347	[3.668892973450375, 0.501485876314666, 0.6321224803308072]	[1.9332638331388077]	[3.7043640622849128, 0.5313470015941404, 0.6511254481047981]	[3.5919145244903925, 0.5046099645898914, 0.6346261045453777]	copresence	[3.7043640622849128]	[68.0, 68.0, 68.0]	[0.7488572733645773, 0.11972748067079285, 0.05238640259224284]	0	[dist_kullbackleibler=1.5165002587025356E-10, correl_spearman=0.08130447968912535, dist_bray=0.35335995846864954]	[dist_kullbackleibler, correl_spearman, dist_bray]
13023	12826	Undirected	186	OTU-OTU3->OTU-OTU80		0.35	13390	OTU-OTU3->OTU-OTU80		OTU-OTU3->OTU-OTU80	FALSE		0.013751	0.039683	[-0.017330716754233436]	3	[-0.015409793427035183]	[correl_spearman=copresence, dist_kullbackleibler=copresence, dist_bray=copresence]	[correl_spearman=0.35453494577517786	[correl_spearman	0.354535	[0.3355400562078141, 4.630085691894182, 0.6413909209269689]	[0.15905783877530563]	[0.35453494577517786, 4.819653696043948, 0.6542548979887954]	[0.315257111385439, 4.440581877791882, 0.6423770481731014]	copresence	[0.35453494577517786]	[68.0, 68.0, 68.0]	[0.1289636756912357, 0.8638424124249166, 0.05635415386864875]	0.013751	[correl_spearman=0.16421953686934493, dist_kullbackleibler=0.006004887987688279, dist_bray=0.42403534395137754]	[correl_spearman, dist_kullbackleibler, dist_bray]
13023	12819	Undirected	188	OTU-OTU3->OTU-OTU89		0.44	13386	OTU-OTU3->OTU-OTU89		OTU-OTU3->OTU-OTU89	FALSE		0.000106	0.000517	[-0.030246909443715508]	3	[-0.03880621411988241]	[correl_spearman=copresence, dist_bray=copresence, dist_kullbackleibler=copresence]	[correl_spearman=0.4397406029565583	[correl_spearman	0.439741	[0.441365064645496, 0.5897070143616426, 5.306659895180089]	[0.16845138199871396]	[0.4397406029565583, 0.619066608169984, 5.730500204107485]	[0.42511817351636794, 0.5800465848404788, 5.441782243955104]	copresence	[0.4397406029565583]	[18.0, 18.0, 18.0]	[0.14406675163146918, 0.07530483958163635, 1.519456912708986]	0.000106	[correl_spearman=0.10292325346802184, dist_bray=0.26838215939786825, dist_kullbackleibler=6.056959005507068E-5]	[correl_spearman, dist_bray, dist_kullbackleibler]
13023	12796	Undirected	189	OTU-OTU3->OTU-OTU99		0.57	13374	OTU-OTU3->OTU-OTU99		OTU-OTU3->OTU-OTU99	FALSE		2.6e-05	0.000141	[-0.0014940740123315242]	3	[-0.008714459983145382]	[correl_spearman=copresence, dist_bray=copresence, dist_kullbackleibler=copresence]	[correl_spearman=0.5696430478235704	[correl_spearman	0.569643	[0.5655989825431129, 0.5474562811582191, 4.480986846120302]	[0.15018280577094434]	[0.5696430478235704, 0.5657408009430349, 4.824244004068554]	[0.5698453047562025, 0.54700733189084, 4.362787070808405]	copresence	[0.5696430478235704]	[64.0, 64.0, 64.0]	[0.11744511521556189, 0.0707781868514599, 1.7527889397023602]	2.6e-05	[correl_spearman=0.04688516522346731, dist_bray=0.23604290842599362, dist_kullbackleibler=3.3236898117516844E-5]	[correl_spearman, dist_bray, dist_kullbackleibler]
13023	12804	Undirected	190	OTU-OTU3->OTU-OTU100		0.46	13035	OTU-OTU3->OTU-OTU100		OTU-OTU3->OTU-OTU100	FALSE		0	0	[0.7306928728125482]	3	[0.7352460163628243]	[dist_bray=copresence, dist_kullbackleibler=copresence, correl_spearman=copresence]	[dist_bray=0.6398617209606337	correl_spearman	0.457493	[0.6207183121150026, 3.7126040011783723, 0.4547028919931592]	[0.06027330699170893]	[0.6398617209606337, 3.835746329142002, 0.4574927307113891]	[0.6086602860803674, 3.6521283061230108, 0.4559103970036611]	copresence	[0.6398617209606337]	[68.0, 68.0, 68.0]	[0.0651508601270292, 0.6164000198735238, 0.09975575803944403]	0	[dist_bray=0.3268261261596749, dist_kullbackleibler=2.2677870692433544E-10, correl_spearman=0.08047368813266387]	[dist_bray, dist_kullbackleibler, correl_spearman]
13023	12787	Undirected	192	OTU-OTU3->OTU-OTU110		0.5	13024	OTU-OTU3->OTU-OTU110		OTU-OTU3->OTU-OTU110	FALSE		0.005569	0.017717	[0.7353010166834446]	3	[0.7256445137301297]	[dist_bray=mutualExclusion, correl_spearman=mutualExclusion, dist_kullbackleibler=mutualExclusion]	[dist_bray=0.8254055733768069	correl_spearman	-0.498491	[0.8091138530393219, -0.4797127434947062, 10.319732421537221]	[0.06647583163357552]	[0.8254055733768069, -0.4984913960436893, 10.633556623830831]	[0.809711802453531, -0.4803863192735437, 10.186043828121099]	mutualExclusion	[0.8254055733768069]	[68.0, 68.0, 68.0]	[0.07019334136678718, 0.11921629414258589, 1.2558380839994]	0.005569	[dist_bray=0.37636197383573367, correl_spearman=0.09576774482569705, dist_kullbackleibler=0.003949516101419359]	[dist_bray, correl_spearman, dist_kullbackleibler]
13011	12804	Undirected	193	OTU-OTU7->OTU-OTU100		0.4	13845	OTU-OTU7->OTU-OTU100		OTU-OTU7->OTU-OTU100	FALSE		1.8e-05	9.8e-05	[8.174083078161]	3	[8.401772274483337]	[dist_kullbackleibler=copresence, correl_spearman=copresence, dist_bray=copresence]	[dist_kullbackleibler=3.7638491350295085	correl_spearman	0.402498	[3.8509081919420622, 0.39933090401358756, 0.5846353049543043]	[1.6795998278139768]	[3.7638491350295085, 0.40249823946703595, 0.5948139023162052]	[3.587005365569289, 0.42101604698715067, 0.5700515256707022]	copresence	[3.7638491350295085]	[92.0, 92.0, 92.0]	[1.0826958754032465, 0.14575362267854328, 0.06938648760910897]	1.8e-05	[dist_kullbackleibler=6.110270365344839E-6, correl_spearman=0.14231972717177188, dist_bray=0.2811220127773054]	[dist_kullbackleibler, correl_spearman, dist_bray]
13011	12787	Undirected	194	OTU-OTU7->OTU-OTU110		0.49	13833	OTU-OTU7->OTU-OTU110		OTU-OTU7->OTU-OTU110	FALSE		0.000495	0.001996	[6.919052035285096]	3	[7.041237904728592]	[dist_kullbackleibler=mutualExclusion, dist_bray=mutualExclusion, correl_spearman=mutualExclusion]	[dist_kullbackleibler=11.164616091807641	correl_spearman	-0.487298	[10.7494752740379, 0.8603318653330224, -0.46962796564814074]	[1.4541163333130112]	[11.164616091807641, 0.8686551058240245, -0.4872977668926198]	[10.852795653030167, 0.8689774247555992, -0.4940880901678853]	mutualExclusion	[11.164616091807641]	[92.0, 92.0, 92.0]	[1.1945591655240213, 0.05265324040669919, 0.12942841068300295]	0.000495	[dist_kullbackleibler=3.458570466035038E-4, dist_bray=0.2992750677271029, correl_spearman=0.08739725009194921]	[dist_kullbackleibler, dist_bray, correl_spearman]
13011	12777	Undirected	196	OTU-OTU7->OTU-OTU13		0.58	13189	OTU-OTU7->OTU-OTU13		OTU-OTU7->OTU-OTU13	FALSE		0.000166	0.000768	[-0.026457825642849205]	3	[-0.018000917539702222]	[correl_spearman=mutualExclusion, dist_bray=mutualExclusion, dist_kullbackleibler=mutualExclusion]	[correl_spearman=-0.5775482872192939	[correl_spearman	-0.577548	[-0.5703634546598002, 0.8695605317656051, 11.587821646686315]	[0.14559333516700498]	[-0.5775482872192939, 0.8764460286498627, 11.911651571159261]	[-0.5853630588504107, 0.8798536606850867, 11.68507553046399]	mutualExclusion	[-0.5775482872192939]	[92.0, 92.0, 92.0]	[0.10579590606159005, 0.04916137558120705, 1.315786451856645]	0.000166	[correl_spearman=0.04473466056396336, dist_bray=0.2611273042629292, dist_kullbackleibler=2.3292822426435045E-4]	[correl_spearman, dist_bray, dist_kullbackleibler]
13011	12775	Undirected	197	OTU-OTU7->OTU-OTU14		0.62	13187	OTU-OTU7->OTU-OTU14		OTU-OTU7->OTU-OTU14	FALSE		0	0	[10.872378893865562]	3	[10.736238631670679]	[dist_kullbackleibler=copresence, dist_bray=copresence, correl_spearman=copresence]	[dist_kullbackleibler=3.693531941140576	correl_spearman	0.623239	[3.619901466463454, 0.6062956926129444, 0.6095531798819963]	[2.1487063103206303]	[3.693531941140576, 0.6009832090751668, 0.6232386171022861]	[3.553859415548934, 0.6019983527138715, 0.6174931685663918]	copresence	[3.693531941140576]	[28.0, 28.0, 28.0]	[1.0541950928202248, 0.11736100420872675, 0.1084130431725011]	0	[dist_kullbackleibler=2.089328710042082E-12, dist_bray=0.2644926477752818, correl_spearman=0.03666984555802122]	[dist_kullbackleibler, dist_bray, correl_spearman]
13011	12808	Undirected	198	OTU-OTU7->OTU-OTU21		0.41	13168	OTU-OTU7->OTU-OTU21		OTU-OTU7->OTU-OTU21	FALSE		0.000231	0.001025	[10.501813354065336]	3	[10.361772627728607]	[dist_kullbackleibler=copresence, correl_spearman=copresence, dist_bray=copresence]	[dist_kullbackleibler=5.539396968479604	correl_spearman	0.405732	[5.566165012921453, 0.39182777865637325, 0.6626850347383317]	[2.0113572139257996]	[5.539396968479604, 0.4057321964219315, 0.6560761086402338]	[5.360897570578911, 0.39339328343621005, 0.6640089825779525]	copresence	[5.539396968479604]	[70.0, 70.0, 70.0]	[1.5823143145782386, 0.14413225028581775, 0.09464066211396899]	0.000231	[dist_kullbackleibler=6.881488750720699E-5, correl_spearman=0.1609081609006216, dist_bray=0.3516384234260429]	[dist_kullbackleibler, correl_spearman, dist_bray]
13011	12969	Undirected	199	OTU-OTU7->OTU-OTU24		0.41	13167	OTU-OTU7->OTU-OTU24		OTU-OTU7->OTU-OTU24	FALSE		0.004185	0.013735	[8.61349606614067]	3	[8.533601689852707]	[dist_kullbackleibler=copresence, dist_bray=copresence, correl_spearman=copresence]	[dist_kullbackleibler=5.454878920405084	correl_spearman	0.412711	[5.177270642115077, 0.6067574330405976, 0.4194804826099317]	[1.8963854038419792]	[5.454878920405084, 0.5890434062917984, 0.41271146681285875]	[5.224083789633426, 0.6116114570534721, 0.41712900089295857]	copresence	[5.454878920405084]	[92.0, 92.0, 92.0]	[1.5508201934452008, 0.08875831706445739, 0.11708513640476538]	0.004185	[dist_kullbackleibler=0.003517773754650677, dist_bray=0.29534890576631123, correl_spearman=0.09809609671057734]	[dist_kullbackleibler, dist_bray, correl_spearman]
13011	12789	Undirected	201	OTU-OTU7->OTU-OTU31		0.55	13152	OTU-OTU7->OTU-OTU31		OTU-OTU7->OTU-OTU31	FALSE		3.1e-05	0.000165	[7.061905960909358]	3	[7.163237013181577]	[dist_kullbackleibler=copresence, dist_bray=copresence, correl_spearman=copresence]	[dist_kullbackleibler=3.8948935092492385	correl_spearman	0.554883	[3.689740714956072, 0.5803135454951572, 0.5546824725701546]	[1.3411451059484685]	[3.8948935092492385, 0.5887285511791852, 0.5548830110428109]	[3.6827229134119146, 0.5760053698510486, 0.5583278367826991]	copresence	[3.8948935092492385]	[92.0, 92.0, 92.0]	[0.7758646788444022, 0.06113210610822804, 0.10290419602635557]	3.1e-05	[dist_kullbackleibler=4.016265768536087E-5, dist_bray=0.3032807955902789, correl_spearman=0.036198923480848855]	[dist_kullbackleibler, dist_bray, correl_spearman]
13011	12914	Undirected	202	OTU-OTU7->OTU-OTU34		0.54	13149	OTU-OTU7->OTU-OTU34		OTU-OTU7->OTU-OTU34	FALSE		0	1e-06	[-0.04672207925951889]	3	[-0.029136217461984425]	[correl_spearman=copresence, dist_kullbackleibler=copresence, dist_bray=copresence]	[correl_spearman=0.5402497317310352	[correl_spearman	0.54025	[0.5416613561233562, 3.188069818300569, 0.5936754896275762]	[0.15663987268172835]	[0.5402497317310352, 3.321557766392084, 0.6110296754140787]	[0.5334658569927807, 3.203601799113458, 0.5909069719819354]	copresence	[0.5402497317310352]	[92.0, 92.0, 92.0]	[0.09346316342458409, 0.5574958787645857, 0.04904546629162503]	0	[correl_spearman=0.03094552262070205, dist_kullbackleibler=1.1457341164700097E-7, dist_bray=0.2962696344680402]	[correl_spearman, dist_kullbackleibler, dist_bray]
13011	12943	Undirected	203	OTU-OTU7->OTU-OTU35		0.44	13147	OTU-OTU7->OTU-OTU35		OTU-OTU7->OTU-OTU35	FALSE		0.00603	0.019044	[0.6727601468523766]	3	[0.6716996742410345]	[dist_bray=copresence, correl_spearman=copresence, dist_kullbackleibler=copresence]	[dist_bray=0.5956692235787503	correl_spearman	0.441267	[0.587162215356143, 0.4555115208837808, 3.7363136216468216]	[0.03663501975966013]	[0.5956692235787503, 0.4412668279901963, 3.9387934407223164]	[0.5784528161944589, 0.48844859258053275, 3.6844254485842933]	copresence	[0.5956692235787503]	[92.0, 92.0, 92.0]	[0.05264149360629562, 0.12631404175022035, 0.6749074219291525]	0.00603	[dist_bray=0.35626679638682224, correl_spearman=0.08205849250369202, dist_kullbackleibler=0.00534575905864243]	[dist_bray, correl_spearman, dist_kullbackleibler]
13011	12833	Undirected	204	OTU-OTU7->OTU-OTU36		0.38	13146	OTU-OTU7->OTU-OTU36		OTU-OTU7->OTU-OTU36	FALSE		0.000479	0.001937	[7.199929881919276]	3	[7.425450328207895]	[dist_kullbackleibler=copresence, correl_spearman=copresence, dist_bray=copresence]	[dist_kullbackleibler=4.227260604722481	correl_spearman	0.383159	[4.135034044997753, 0.3766136865947669, 0.6064749197099438]	[1.4638030637921609]	[4.227260604722481, 0.3831586666930753, 0.6086327344287668]	[4.104383919206888, 0.3868285268821525, 0.610286255616005]	copresence	[4.227260604722481]	[92.0, 92.0, 92.0]	[0.8396501199884868, 0.1307440821734664, 0.0690367199446373]	0.000479	[dist_kullbackleibler=1.6477761866462437E-4, correl_spearman=0.15254798832529215, dist_bray=0.3467644721240043]	[dist_kullbackleibler, correl_spearman, dist_bray]
13011	12767	Undirected	205	OTU-OTU7->OTU-OTU43		0.59	13130	OTU-OTU7->OTU-OTU43		OTU-OTU7->OTU-OTU43	FALSE		0	0	[8.258161959895654]	3	[8.670283508397125]	[dist_kullbackleibler=copresence, correl_spearman=copresence, dist_bray=copresence]	[dist_kullbackleibler=3.323876355222442	correl_spearman	0.588265	[3.3217071455239404, 0.5814564464833242, 0.5162102312883187]	[1.8342295929283703]	[3.323876355222442, 0.588265282915228, 0.5141471266209656]	[3.1908810307327844, 0.6002823905353131, 0.5035336302177128]	copresence	[3.323876355222442]	[90.0, 90.0, 90.0]	[0.916761425024714, 0.12627592917181396, 0.07026464485454974]	0	[dist_kullbackleibler=1.161013496453478E-8, correl_spearman=0.06021558200308219, dist_bray=0.21554603476006573]	[dist_kullbackleibler, correl_spearman, dist_bray]
13011	12922	Undirected	206	OTU-OTU7->OTU-OTU44		0.46	13127	OTU-OTU7->OTU-OTU44		OTU-OTU7->OTU-OTU44	FALSE		7e-06	4.5e-05	[0.7804277247055618]	3	[0.7715800379020028]	[dist_bray=copresence, dist_kullbackleibler=copresence, correl_spearman=copresence]	[dist_bray=0.5171019562943787	correl_spearman	0.458974	[0.5249210656574925, 4.152666769126706, 0.44960029924725003]	[0.063141820321223]	[0.5171019562943787, 4.124088179117258, 0.4589743589743586]	[0.5364874771045232, 4.024194137197487, 0.4547681280291103]	copresence	[0.5171019562943787]	[86.0, 86.0, 86.0]	[0.09951927703220742, 1.3166721505424004, 0.14307468613283258]	7e-06	[dist_bray=0.2171408531343506, dist_kullbackleibler=3.6772659481876246E-6, correl_spearman=0.12096730304722103]	[dist_bray, dist_kullbackleibler, correl_spearman]
13011	12810	Undirected	207	OTU-OTU7->OTU-OTU45		0.52	13126	OTU-OTU7->OTU-OTU45		OTU-OTU7->OTU-OTU45	FALSE		2.6e-05	0.00014	[0.019881475867771073]	3	[1.7495698763638558E-4]	[correl_spearman=copresence, dist_bray=copresence, dist_kullbackleibler=copresence]	[correl_spearman=0.5248709629091564	[correl_spearman	0.524871	[0.5022283069372496, 0.6526591390402612, 4.431603127216228]	[0.14774425062988147]	[0.5248709629091564, 0.6609087596668698, 4.463187366832536]	[0.5203229355534855, 0.6488775862049585, 4.522395555092793]	copresence	[0.5248709629091564]	[92.0, 92.0, 92.0]	[0.12393438690195185, 0.06196756557247181, 1.2176311876579047]	2.6e-05	[correl_spearman=0.07691785437663856, dist_bray=0.3547742451331769, dist_kullbackleibler=1.3291411146143517E-5]	[correl_spearman, dist_bray, dist_kullbackleibler]
13011	12920	Undirected	208	OTU-OTU7->OTU-OTU46		0.52	13125	OTU-OTU7->OTU-OTU46		OTU-OTU7->OTU-OTU46	FALSE		3.5e-05	0.000188	[0.018356864756578405]	3	[-0.007053782328136171]	[correl_spearman=copresence, dist_kullbackleibler=copresence, dist_bray=copresence]	[correl_spearman=0.5180404951457221	[correl_spearman	0.51804	[0.5187447774503423, 4.282481389637563, 0.5973602290639605]	[0.15753227356712152]	[0.5180404951457221, 4.494368039467696, 0.6173451266774255]	[0.5287998510999483, 4.227299498988941, 0.5903904711624344]	copresence	[0.5180404951457221]	[92.0, 92.0, 92.0]	[0.1283778382191848, 1.251529537430973, 0.07615576416708751]	3.5e-05	[correl_spearman=0.071121765442557, dist_kullbackleibler=2.5119413656238265E-5, dist_bray=0.28571628374432234]	[correl_spearman, dist_kullbackleibler, dist_bray]
13011	12793	Undirected	209	OTU-OTU7->OTU-OTU52		0.38	13108	OTU-OTU7->OTU-OTU52		OTU-OTU7->OTU-OTU52	FALSE		5.8e-05	0.000297	[0.015970130307244083]	3	[0.008860159605726513]	[correl_spearman=copresence, dist_bray=copresence, dist_kullbackleibler=copresence]	[correl_spearman=0.3839700146989007	[correl_spearman	0.38397	[0.37189021178828435, 0.5500049201972701, 3.620357381729401]	[0.1429515056055084]	[0.3839700146989007, 0.5499351295564683, 3.649628320388694]	[0.38003723334169587, 0.5383634175484479, 3.558690092091008]	copresence	[0.3839700146989007]	[92.0, 92.0, 92.0]	[0.14380125506071986, 0.08311386968466404, 0.8617487628680445]	5.8e-05	[correl_spearman=0.16920059737534598, dist_bray=0.2877906740506011, dist_kullbackleibler=1.7903656126971867E-5]	[correl_spearman, dist_bray, dist_kullbackleibler]
13011	12886	Undirected	210	OTU-OTU7->OTU-OTU54		0.54	13107	OTU-OTU7->OTU-OTU54		OTU-OTU7->OTU-OTU54	FALSE		0.000652	0.002563	[0.7067415995908772]	3	[0.7068581495110655]	[dist_bray=mutualExclusion, correl_spearman=mutualExclusion, dist_kullbackleibler=mutualExclusion]	[dist_bray=0.8034252562436328	correl_spearman	-0.544151	[0.7972290200926864, -0.5475290752438101, 9.026582722978855]	[0.05163877892633305]	[0.8034252562436328, -0.5441514563107915, 9.390591504173123]	[0.7883419659731519, -0.5498912296831711, 9.119785443261883]	mutualExclusion	[0.8034252562436328]	[92.0, 92.0, 92.0]	[0.04492233653154041, 0.10339798530549517, 0.9158239341993825]	0.000652	[dist_bray=0.3349153173152123, correl_spearman=0.047313093571437204, dist_kullbackleibler=7.761102069524517E-4]	[dist_bray, correl_spearman, dist_kullbackleibler]
13011	12903	Undirected	211	OTU-OTU7->OTU-OTU56		0.48	13106	OTU-OTU7->OTU-OTU56		OTU-OTU7->OTU-OTU56	FALSE		0	3e-06	[9.856072620193762]	3	[10.087914699437922]	[dist_kullbackleibler=copresence, correl_spearman=copresence, dist_bray=copresence]	[dist_kullbackleibler=4.476236848404289	correl_spearman	0.48312	[4.374309057828426, 0.4828933021002434, 0.609752758584721]	[1.9921597240546394]	[4.476236848404289, 0.48312041770556596, 0.6326468411376016]	[4.0485613120181885, 0.5106684030207164, 0.6166172664180118]	copresence	[4.476236848404289]	[62.0, 62.0, 62.0]	[1.2782063550333438, 0.12132078501173947, 0.07827622626630093]	0	[dist_kullbackleibler=2.1666184579771652E-7, correl_spearman=0.07885193860592432, dist_bray=0.259379803300979]	[dist_kullbackleibler, correl_spearman, dist_bray]
13011	13104	Undirected	212	OTU-OTU7->OTU-OTU59		0.56	13105	OTU-OTU7->OTU-OTU59		OTU-OTU7->OTU-OTU59	FALSE		0	2e-06	[-0.043115234001928474]	3	[-0.01953353358970441]	[correl_spearman=copresence, dist_kullbackleibler=copresence, dist_bray=copresence]	[correl_spearman=0.5563595815187768	[correl_spearman	0.55636	[0.5328974511290514, 5.203968912000429, 0.6668885991043865]	[0.14488626118533107]	[0.5563595815187768, 5.171135019302259, 0.6634134824837089]	[0.5303033670189036, 4.9630998678658536, 0.666444383986094]	copresence	[0.5563595815187768]	[4.0, 4.0, 4.0]	[0.10716133058899491, 1.4086006015593346, 0.0890571845755645]	0	[correl_spearman=0.045747951986756796, dist_kullbackleibler=1.530271149796647E-7, dist_bray=0.3345614287061536]	[correl_spearman, dist_kullbackleibler, dist_bray]
13011	12858	Undirected	213	OTU-OTU7->OTU-OTU64		0.56	13088	OTU-OTU7->OTU-OTU64		OTU-OTU7->OTU-OTU64	FALSE		0	0	[0.793942353200523]	3	[0.7831190168733684]	[dist_bray=copresence, correl_spearman=copresence, dist_kullbackleibler=copresence]	[dist_bray=0.6375001069025716	correl_spearman	0.556065	[0.6160008959742221, 0.5516671718618256, 3.7806976543787134]	[0.06356690113923287]	[0.6375001069025716, 0.5560647045724435, 3.9459216697825847]	[0.6201135119824995, 0.5485981788524106, 3.7082093889171928]	copresence	[0.6375001069025716]	[92.0, 92.0, 92.0]	[0.07367319478260646, 0.11629192464487889, 1.041355437574613]	0	[dist_bray=0.2690464377753885, correl_spearman=0.05082851058779897, dist_kullbackleibler=5.702386340900034E-10]	[dist_bray, correl_spearman, dist_kullbackleibler]
13011	12773	Undirected	214	OTU-OTU7->OTU-OTU65		0.51	13087	OTU-OTU7->OTU-OTU65		OTU-OTU7->OTU-OTU65	FALSE		1e-06	6e-06	[-0.019572042508327833]	3	[-0.02153071834130409]	[correl_spearman=copresence, dist_kullbackleibler=copresence, dist_bray=copresence]	[correl_spearman=0.5140236427187151	[correl_spearman	0.514024	[0.5060619150849577, 4.780143348151241, 0.5909941572379069]	[0.15033010564319507]	[0.5140236427187151, 4.674385905102851, 0.6001701703285715]	[0.5241664148533501, 4.565110474716878, 0.59912160457679]	copresence	[0.5140236427187151]	[44.0, 44.0, 44.0]	[0.14095847400792266, 1.558997636137507, 0.07344639582897497]	1e-06	[correl_spearman=0.0799736993267971, dist_kullbackleibler=6.175466228386384E-7, dist_bray=0.2064032445725048]	[correl_spearman, dist_kullbackleibler, dist_bray]
13011	12835	Undirected	215	OTU-OTU7->OTU-OTU79		0.4	13077	OTU-OTU7->OTU-OTU79		OTU-OTU7->OTU-OTU79	FALSE		0.000133	0.000627	[-0.011634162807211872]	3	[-0.006460212142638149]	[correl_spearman=copresence, dist_kullbackleibler=copresence, dist_bray=copresence]	[correl_spearman=0.4049555799479213	[correl_spearman	0.404956	[0.40429337411049865, 5.293073421044646, 0.5996154122546953]	[0.14240649782349318]	[0.4049555799479213, 5.363749222125254, 0.5806608500469361]	[0.42948080606707967, 5.131313961110955, 0.5951174075847672]	copresence	[0.4049555799479213]	[68.0, 68.0, 68.0]	[0.1473340395648619, 1.35027902106102, 0.11148651870649741]	0.000133	[correl_spearman=0.142284126691471, dist_kullbackleibler=4.810798603605004E-5, dist_bray=0.3111580637661824]	[correl_spearman, dist_kullbackleibler, dist_bray]
13011	12819	Undirected	217	OTU-OTU7->OTU-OTU89		0.35	13060	OTU-OTU7->OTU-OTU89		OTU-OTU7->OTU-OTU89	FALSE		0.000348	0.001473	[0.02141662352051765]	3	[0.019844583863490767]	[correl_spearman=copresence, dist_bray=copresence, dist_kullbackleibler=copresence]	[correl_spearman=0.34935867117844416	[correl_spearman	0.349359	[0.34018932372787924, 0.6064725545089356, 5.380220678549611]	[0.14882003764631418]	[0.34935867117844416, 0.6222495702816255, 5.459758101421916]	[0.32840957305918783, 0.6041506813280517, 5.176430379972466]	copresence	[0.34935867117844416]	[26.0, 26.0, 26.0]	[0.1515917124391296, 0.08332911674634223, 1.6234810186027833]	0.000348	[correl_spearman=0.205318634989547, dist_bray=0.29579744849909306, dist_kullbackleibler=1.0077655502560567E-4]	[correl_spearman, dist_bray, dist_kullbackleibler]
13011	12798	Undirected	218	OTU-OTU7->OTU-OTU98		0.25	13050	OTU-OTU7->OTU-OTU98		OTU-OTU7->OTU-OTU98	FALSE		0.005898	0.018696	[13.68564294093642]	3	[13.589770739693595]	[dist_kullbackleibler=mutualExclusion, correl_spearman=mutualExclusion, dist_bray=mutualExclusion]	[dist_kullbackleibler=18.513074836824856	correl_spearman	-0.251616	[17.855180601233627, -0.26889502913819907, 0.9501405862878672]	[3.0815994569415293]	[18.513074836824856, -0.25161586891125304, 0.9548140426678546]	[18.174486173593465, -0.25787344239844134, 0.9549578518114572]	mutualExclusion	[18.513074836824856]	[78.0, 78.0, 78.0]	[2.0836103974400157, 0.14687592650344833, 0.036658379050828374]	0.005898	[dist_kullbackleibler=0.0015635167752827694, correl_spearman=0.24721531458097123, dist_bray=0.39399002429557817]	[dist_kullbackleibler, correl_spearman, dist_bray]
13011	12796	Undirected	219	OTU-OTU7->OTU-OTU99		0.4	13048	OTU-OTU7->OTU-OTU99		OTU-OTU7->OTU-OTU99	FALSE		4.9e-05	0.000252	[0.755652636144573]	3	[0.7477426005683793]	[dist_bray=copresence, correl_spearman=copresence, dist_kullbackleibler=copresence]	[dist_bray=0.6360412766843246	correl_spearman	0.395014	[0.6291719172750834, 0.38566817056332314, 4.781727861105139]	[0.0677109309348279]	[0.6360412766843246, 0.3950142450142447, 4.904319118346203]	[0.6309699691345437, 0.39459667617073135, 4.589850686077741]	copresence	[0.6360412766843246]	[86.0, 86.0, 86.0]	[0.07494157316791354, 0.14180203947450573, 1.2204245122685222]	4.9e-05	[dist_bray=0.332461014326227, correl_spearman=0.15559414330580623, dist_kullbackleibler=1.3886716197841764E-5]	[dist_bray, correl_spearman, dist_kullbackleibler]
13005	12817	Undirected	220	OTU-OTU84->OTU-OTU40		0.26	13785	OTU-OTU84->OTU-OTU40		OTU-OTU84->OTU-OTU40	FALSE		0.006519	0.020459	[-0.00783521289552771]	3	[-7.40177558641344E-4]	[correl_spearman=copresence, dist_kullbackleibler=copresence, dist_bray=copresence]	[correl_spearman=0.2587287322097661	[correl_spearman	0.258729	[0.2720013079333732, 4.24844435693113, 0.5530540437094957]	[0.14680615839138522]	[0.2587287322097661, 4.348783731085865, 0.5563246213168627]	[0.2950061841867905, 4.135476176934556, 0.5571554429320373]	copresence	[0.2587287322097661]	[100.0, 100.0, 100.0]	[0.1696261039494694, 1.1132451718246, 0.0946271846004563]	0.006519	[correl_spearman=0.2539138660566642, dist_kullbackleibler=0.002805427901324542, dist_bray=0.24050702367750254]	[correl_spearman, dist_kullbackleibler, dist_bray]
13005	12886	Undirected	221	OTU-OTU84->OTU-OTU54		0.55	13775	OTU-OTU84->OTU-OTU54		OTU-OTU84->OTU-OTU54	FALSE		0.000191	0.000862	[2.352614551880359]	3	[2.3951867015228303]	[dist_kullbackleibler=copresence, dist_bray=copresence, correl_spearman=copresence]	[dist_kullbackleibler=0.8726694921898895	correl_spearman	0.546922	[0.846747625086164, 0.31296023862784345, 0.5399740447378084]	[0.5343428009998461]	[0.8726694921898895, 0.31173391641283577, 0.546921835666773]	[0.8002429406800513, 0.30763912231255486, 0.5460248282441955]	copresence	[0.8726694921898895]	[100.0, 100.0, 100.0]	[0.21280050664691877, 0.05014393788739791, 0.1118744716128092]	0.000191	[dist_kullbackleibler=3.94445443768765E-4, dist_bray=0.1691803427159293, correl_spearman=0.04736199958303511]	[dist_kullbackleibler, dist_bray, correl_spearman]
13005	12824	Undirected	222	OTU-OTU84->OTU-OTU85		0.27	13733	OTU-OTU84->OTU-OTU85		OTU-OTU84->OTU-OTU85	FALSE		0.015729	0.044874	[0.5761875846903926]	3	[0.5677270097512813]	[dist_bray=copresence, correl_spearman=copresence, dist_kullbackleibler=copresence]	[dist_bray=0.5477833896369086	correl_spearman	0.268359	[0.5371353703233938, 0.24438954697674298, 2.714927270568611]	[0.04506504821597614]	[0.5477833896369086, 0.26835907350017835, 2.761191375978369]	[0.534395201748619, 0.24115600986790592, 2.6672838057654555]	copresence	[0.5477833896369086]	[100.0, 100.0, 100.0]	[0.053259494163293335, 0.1375779624114071, 0.5035244070680092]	0.015729	[dist_bray=0.44727168155802033, correl_spearman=0.21554155427587668, dist_kullbackleibler=0.005107241428275344]	[dist_bray, correl_spearman, dist_kullbackleibler]
13000	12802	Undirected	223	OTU-OTU88->OTU-OTU101		0.47	13758	OTU-OTU88->OTU-OTU101		OTU-OTU88->OTU-OTU101	FALSE		0.000959	0.003633	[0.0026442532212104753]	3	[0.013105880510945014]	[correl_spearman=copresence, dist_bray=copresence, dist_kullbackleibler=copresence]	[correl_spearman=0.4677237515959309	[correl_spearman	0.467724	[0.4772637242148168, 0.4836851254398533, 3.5780723497403857]	[0.13341600823853353]	[0.4677237515959309, 0.4864936467185428, 3.7405412418381534]	[0.47220012798304567, 0.48180155704924743, 3.447336033637006]	copresence	[0.4677237515959309]	[100.0, 100.0, 100.0]	[0.1487125204143966, 0.06783889133411473, 1.2406636343040398]	0.000959	[correl_spearman=0.11436688653005522, dist_bray=0.2679060284043392, dist_kullbackleibler=6.178605444435714E-4]	[correl_spearman, dist_bray, dist_kullbackleibler]
13000	13046	Undirected	224	OTU-OTU88->OTU-OTU33		0.7	13534	OTU-OTU88->OTU-OTU33		OTU-OTU88->OTU-OTU33	FALSE		0	0	[0.011724637758608112]	3	[0.023069410808331844]	[correl_spearman=copresence, dist_kullbackleibler=copresence, dist_bray=copresence]	[correl_spearman=0.7022583610098108	[correl_spearman	0.702258	[0.7012817800643721, 1.9092538766787928, 0.2778957829946059]	[0.13943078670398282]	[0.7022583610098108, 1.9318596968225414, 0.2762999533931513]	[0.7170888200695029, 1.9015650571243026, 0.2725887372046117]	copresence	[0.7022583610098108]	[100.0, 100.0, 100.0]	[0.11265991640837679, 0.7607303644771878, 0.058610759100508]	0	[correl_spearman=0.02166043897393033, dist_kullbackleibler=5.0569786136378525E-8, dist_bray=0.06926580777647029]	[correl_spearman, dist_kullbackleibler, dist_bray]
13000	12922	Undirected	225	OTU-OTU88->OTU-OTU44		0.41	13518	OTU-OTU88->OTU-OTU44		OTU-OTU88->OTU-OTU44	FALSE		0.00367	0.012246	[0.6873714803688135]	3	[0.688038733285959]	[dist_bray=copresence, dist_kullbackleibler=copresence, correl_spearman=copresence]	[dist_bray=0.5899941260454715	correl_spearman	0.407621	[0.5773828636751531, 4.604230126107026, 0.42564138092077247]	[0.06220790743497186]	[0.5899941260454715, 4.7668152741123295, 0.40762127476955734]	[0.5876557962310098, 4.317747689793049, 0.46088515259231205]	copresence	[0.5899941260454715]	[90.0, 90.0, 90.0]	[0.08254176838652158, 1.2422734041015757, 0.12975892295931557]	0.00367	[dist_bray=0.35006062339019084, dist_kullbackleibler=0.0018874632614591658, correl_spearman=0.13244192368936897]	[dist_bray, dist_kullbackleibler, correl_spearman]
13000	12798	Undirected	227	OTU-OTU88->OTU-OTU98		0.47	13474	OTU-OTU88->OTU-OTU98		OTU-OTU88->OTU-OTU98	FALSE		0	1e-06	[0.8806761295087853]	3	[0.8744026161216166]	[dist_bray=mutualExclusion, correl_spearman=mutualExclusion, dist_kullbackleibler=mutualExclusion]	[dist_bray=0.9858053901345495	correl_spearman	-0.474849	[0.9806910665385383, -0.46802298510703555, 19.281187673358986]	[0.04221388395583873]	[0.9858053901345495, -0.4748486727456358, 20.0682888317743]	[0.9850573153835777, -0.4612363420970161, 19.64175913404605]	mutualExclusion	[0.9858053901345495]	[86.0, 86.0, 86.0]	[0.01657647884393189, 0.1366453780831667, 1.4051267775313665]	0	[dist_bray=0.20453156390856364, correl_spearman=0.11035976490391675, dist_kullbackleibler=8.009486374138675E-8]	[dist_bray, correl_spearman, dist_kullbackleibler]
12998	12896	Undirected	228	OTU-OTU48->OTU-OTU1		0.28	13300	OTU-OTU48->OTU-OTU1		OTU-OTU48->OTU-OTU1	FALSE		0.009302	0.028113	[0.002576387951787974]	3	[0.0017444858420922246]	[correl_spearman=copresence, dist_kullbackleibler=copresence, dist_bray=copresence]	[correl_spearman=0.2775719019636833	[correl_spearman	0.277572	[0.2891790827447618, 4.627296642098557, 0.6183579231179271]	[0.14083019130416138]	[0.2775719019636833, 4.858882131938975, 0.6295092497529967]	[0.2954539867632098, 4.551232717361032, 0.6161405862621581]	copresence	[0.2775719019636833]	[96.0, 96.0, 96.0]	[0.14687497835775942, 0.950102583833436, 0.05793643510270121]	0.009302	[correl_spearman=0.2266253401325264, dist_kullbackleibler=0.002907026460927886, dist_bray=0.3965555884715547]	[correl_spearman, dist_kullbackleibler, dist_bray]
12998	12895	Undirected	229	OTU-OTU48->OTU-OTU25		0.31	13155	OTU-OTU48->OTU-OTU25		OTU-OTU48->OTU-OTU25	FALSE		0.011417	0.033582	[0.6954047948557878]	3	[0.6901826521213608]	[dist_bray=copresence, dist_kullbackleibler=copresence, correl_spearman=copresence]	[dist_bray=0.6354267945386638	correl_spearman	0.310245	[0.6289757580912706, 4.749664018937454, 0.3057806906246106]	[0.048129807256053064]	[0.6354267945386638, 4.850495062517332, 0.3102447231927654]	[0.6301071865201853, 4.597546684694346, 0.3182563063303011]	copresence	[0.6354267945386638]	[92.0, 92.0, 92.0]	[0.06331196000622934, 0.990530256374814, 0.15325046409489004]	0.011417	[dist_bray=0.40390486688899396, dist_kullbackleibler=0.0036931619896015677, correl_spearman=0.22389469134722167]	[dist_bray, dist_kullbackleibler, correl_spearman]
12998	12789	Undirected	230	OTU-OTU48->OTU-OTU31		0.33	13136	OTU-OTU48->OTU-OTU31		OTU-OTU48->OTU-OTU31	FALSE		0.002544	0.00876	[-0.0886360189245651]	3	[-0.08903120296130362]	[correl_spearman=copresence, dist_kullbackleibler=copresence, dist_bray=copresence]	[correl_spearman=0.3277256598494806	[correl_spearman	0.327726	[0.3305457544826627, 2.21569122859945, 0.5023945472031578]	[0.14099728075201653]	[0.3277256598494806, 2.242219932636865, 0.5120075245703166]	[0.3340276313989118, 2.1458901595641473, 0.5161264758189923]	copresence	[0.3277256598494806]	[100.0, 100.0, 100.0]	[0.17420192506150098, 0.6324015975582016, 0.06622593758281331]	0.002544	[correl_spearman=0.15738207325681247, dist_kullbackleibler=9.472889433397302E-4, dist_bray=0.38457180563428917]	[correl_spearman, dist_kullbackleibler, dist_bray]
12998	13066	Undirected	232	OTU-OTU48->OTU-OTU41		0.34	13117	OTU-OTU48->OTU-OTU41		OTU-OTU48->OTU-OTU41	FALSE		0.000326	0.001391	[-0.024495663504016385]	3	[-0.029943848525334927]	[correl_spearman=copresence, dist_kullbackleibler=copresence, dist_bray=copresence]	[correl_spearman=0.3434769167874561	[correl_spearman	0.343477	[0.3562652567865049, 4.382594644028699, 0.60812558624894]	[0.16049984419616437]	[0.3434769167874561, 4.539380200746344, 0.6171816518652131]	[0.3433957039215856, 4.411699039576336, 0.6070628345885241]	copresence	[0.3434769167874561]	[100.0, 100.0, 100.0]	[0.14164459887350633, 0.8369477384295928, 0.06056941384802458]	0.000326	[correl_spearman=0.1524039563334842, dist_kullbackleibler=1.1892732462337463E-4, dist_bray=0.3147831021983851]	[correl_spearman, dist_kullbackleibler, dist_bray]
12998	13000	Undirected	234	OTU-OTU48->OTU-OTU88		0.76	13055	OTU-OTU48->OTU-OTU88		OTU-OTU48->OTU-OTU88	FALSE		0	0	[0.6137242600625565]	3	[0.6113129928596259]	[dist_bray=copresence, correl_spearman=copresence, dist_kullbackleibler=copresence]	[dist_bray=0.24056536260385442	correl_spearman	0.758959	[0.23909651516085653, 0.7582578855049859, 1.4868968074288262]	[0.054352422239564144]	[0.24056536260385442, 0.7589585453532595, 1.507938438934642]	[0.23241909523442972, 0.7696378876862031, 1.4402023347328234]	copresence	[0.24056536260385442]	[100.0, 100.0, 100.0]	[0.05337581650555477, 0.08668664327142546, 0.5957772173853852]	0	[dist_bray=0.05357862804528324, correl_spearman=0.004463583165845608, dist_kullbackleibler=1.0191003596560222E-10]	[dist_bray, correl_spearman, dist_kullbackleibler]
12998	12798	Undirected	235	OTU-OTU48->OTU-OTU98		0.47	13037	OTU-OTU48->OTU-OTU98		OTU-OTU48->OTU-OTU98	FALSE		0	1e-06	[0.8642487236377225]	3	[0.8609465438469024]	[dist_bray=mutualExclusion, dist_kullbackleibler=mutualExclusion, correl_spearman=mutualExclusion]	[dist_bray=0.952294329806392	correl_spearman	-0.466019	[0.9371799071106129, 21.116004578203533, -0.45905022826318176]	[0.04373351315933697]	[0.952294329806392, 22.57083729778587, -0.4660186733581857]	[0.9523519637877151, 22.032003797422103, -0.47580704719195943]	mutualExclusion	[0.952294329806392]	[86.0, 86.0, 86.0]	[0.05115088887222237, 3.3519022274329204, 0.13973261259681896]	0	[dist_bray=0.3680325378845283, dist_kullbackleibler=3.6796949487438724E-8, correl_spearman=0.12584651374751354]	[dist_bray, dist_kullbackleibler, correl_spearman]
12998	12802	Undirected	236	OTU-OTU48->OTU-OTU101		0.5	12999	OTU-OTU48->OTU-OTU101		OTU-OTU48->OTU-OTU101	FALSE		1.2e-05	7.1e-05	[-0.023420408041562993]	3	[-0.03595990283776168]	[correl_spearman=copresence, dist_bray=copresence, dist_kullbackleibler=copresence]	[correl_spearman=0.4959615820566281	[correl_spearman	0.495962	[0.5075437131716236, 0.45256306642136446, 2.5398585199810406]	[0.14599898867651265]	[0.4959615820566281, 0.4604368318762633, 2.670852058347468]	[0.525641688187793, 0.4540338688199053, 2.453511304048278]	copresence	[0.4959615820566281]	[100.0, 100.0, 100.0]	[0.1476874416900645, 0.05312787166768879, 0.7141786041066329]	1.2e-05	[correl_spearman=0.07864212136905102, dist_bray=0.24534328585904852, dist_kullbackleibler=8.564294413426765E-6]	[correl_spearman, dist_bray, dist_kullbackleibler]
12991	12802	Undirected	237	OTU-OTU71->OTU-OTU101		0.41	13181	OTU-OTU71->OTU-OTU101		OTU-OTU71->OTU-OTU101	FALSE		0.009469	0.028472	[0.6678284752945676]	3	[0.6664080185599406]	[dist_bray=copresence, dist_kullbackleibler=copresence, correl_spearman=copresence]	[dist_bray=0.5037172176910112	correl_spearman	0.407553	[0.48869668919637904, 3.920031058377988, 0.43266386440185095]	[0.060867020008921045]	[0.5037172176910112, 4.25248145147074, 0.4075529703179423]	[0.4907193061279382, 3.8546449716104894, 0.4434535283915214]	copresence	[0.5037172176910112]	[100.0, 100.0, 100.0]	[0.08936327775798925, 1.452783912600236, 0.17164731506019523]	0.009469	[dist_bray=0.27609632535319495, dist_kullbackleibler=0.006884807928793313, correl_spearman=0.14039859174751362]	[dist_bray, dist_kullbackleibler, correl_spearman]
12991	12985	Undirected	238	OTU-OTU71->OTU-OTU103		0.32	13179	OTU-OTU71->OTU-OTU103		OTU-OTU71->OTU-OTU103	FALSE		0.00136	0.00498	[-0.01958477027301053]	3	[-0.019825344440723976]	[correl_spearman=copresence, dist_kullbackleibler=copresence, dist_bray=copresence]	[correl_spearman=0.3229115237055196	[correl_spearman	0.322912	[0.32653939820628447, 4.8832391578093, 0.6236274968516382]	[0.1521558196596578]	[0.3229115237055196, 4.6761403587237895, 0.6591616040185879]	[0.32259551892083194, 4.630225512210506, 0.638520585477734]	copresence	[0.3229115237055196]	[100.0, 100.0, 100.0]	[0.13300914997685578, 1.5465286493692032, 0.0702749812194584]	0.00136	[correl_spearman=0.17112875342689593, dist_kullbackleibler=6.550050745249836E-4, dist_bray=0.2504721429658685]	[correl_spearman, dist_kullbackleibler, dist_bray]
12991	12868	Undirected	239	OTU-OTU71->OTU-OTU105		0.51	13174	OTU-OTU71->OTU-OTU105		OTU-OTU71->OTU-OTU105	FALSE		6.2e-05	0.000316	[-0.025363628718382616]	3	[-0.007333331917710988]	[correl_spearman=copresence, dist_bray=copresence, dist_kullbackleibler=copresence]	[correl_spearman=0.5117299202670139	[correl_spearman	0.51173	[0.48682219398552035, 0.45727619803329994, 2.6676505562003414]	[0.15020950629086952]	[0.5117299202670139, 0.4748393933929762, 2.6317027948163862]	[0.4910819840461259, 0.4426321067143437, 2.662130885879665]	copresence	[0.5117299202670139]	[100.0, 100.0, 100.0]	[0.12001479114592496, 0.0855149027810718, 0.6775069020128294]	6.2e-05	[correl_spearman=0.07687411687703627, dist_bray=0.23740216679319803, dist_kullbackleibler=5.1134871597247056E-5]	[correl_spearman, dist_bray, dist_kullbackleibler]
12991	12814	Undirected	240	OTU-OTU71->OTU-OTU108		0.59	13172	OTU-OTU71->OTU-OTU108		OTU-OTU71->OTU-OTU108	FALSE		0	1e-06	[0.00944539475929669]	3	[-4.6775600949579233E-4]	[correl_spearman=copresence, dist_kullbackleibler=copresence, dist_bray=copresence]	[correl_spearman=0.5920674350358435	[correl_spearman	0.592067	[0.5967593712476489, 2.0306537475874777, 0.33431701997059365]	[0.15685561507985718]	[0.5920674350358435, 2.041391284308288, 0.34589969140707777]	[0.60314587316149, 2.017052196722596, 0.34497054645588976]	copresence	[0.5920674350358435]	[100.0, 100.0, 100.0]	[0.12473060106481872, 0.7540025721074309, 0.07065298815838315]	0	[correl_spearman=0.04541490218945721, dist_kullbackleibler=1.9640621962135896E-7, dist_bray=0.1156213796828276]	[correl_spearman, dist_kullbackleibler, dist_bray]
12991	12801	Undirected	241	OTU-OTU71->OTU-OTU12		0.63	13091	OTU-OTU71->OTU-OTU12		OTU-OTU71->OTU-OTU12	FALSE		0	1e-06	[0.7075167612284948]	3	[0.7061140161236539]	[dist_bray=copresence, dist_kullbackleibler=copresence, correl_spearman=copresence]	[dist_bray=0.4709097674198638	correl_spearman	0.634882	[0.4420679359856871, 2.6819403004025686, 0.6459477417968141]	[0.06403075099191174]	[0.4709097674198638, 2.915871996087698, 0.6348817467093574]	[0.4500264513652736, 2.587833442221081, 0.6544280498079098]	copresence	[0.4709097674198638]	[88.0, 88.0, 88.0]	[0.059499407742323845, 1.002846869129505, 0.10173482283142742]	0	[dist_bray=0.13951769934566327, dist_kullbackleibler=2.1422188312136825E-7, correl_spearman=0.02086706525224874]	[dist_bray, dist_kullbackleibler, correl_spearman]
12991	12943	Undirected	243	OTU-OTU71->OTU-OTU35		0.68	13064	OTU-OTU71->OTU-OTU35		OTU-OTU71->OTU-OTU35	FALSE		1e-06	1e-05	[-0.03873953193967942]	3	[-0.05083092129925559]	[correl_spearman=copresence, dist_bray=copresence, dist_kullbackleibler=copresence]	[correl_spearman=0.6780249409871788	[correl_spearman	0.678025	[0.6620124221320749, 0.4163471157069779, 1.6729315072138906]	[0.14483560276310306]	[0.6780249409871788, 0.42204343068842987, 1.679551511341728]	[0.6750466890760396, 0.4248045059371429, 1.6270072386864218]	copresence	[0.6780249409871788]	[100.0, 100.0, 100.0]	[0.11204582678712624, 0.04878408095788187, 0.39267978788229596]	1e-06	[correl_spearman=0.016602686640165565, dist_bray=0.2201218577547004, dist_kullbackleibler=4.845123503516291E-6]	[correl_spearman, dist_bray, dist_kullbackleibler]
12991	12817	Undirected	245	OTU-OTU71->OTU-OTU40		0.25	13054	OTU-OTU71->OTU-OTU40		OTU-OTU71->OTU-OTU40	FALSE		3e-06	1.8e-05	[-0.031908558300757416]	3	[-0.023387492246517184]	[correl_spearman=mutualExclusion, dist_kullbackleibler=mutualExclusion, dist_bray=mutualExclusion]	[correl_spearman=-0.2498157380888413	[correl_spearman	-0.249816	[-0.2557867527181599, 14.92699198664685, 0.9570259789654814]	[0.14542637713319495]	[-0.2498157380888413, 15.206085635904428, 0.961255835787498]	[-0.2659144267293402, 14.925449314039845, 0.9631218643162345]	mutualExclusion	[-0.2498157380888413]	[100.0, 100.0, 100.0]	[0.1875995429795922, 1.1374681935769624, 0.025452578705024886]	3e-06	[correl_spearman=0.29578555102632886, dist_kullbackleibler=6.702209287556826E-7, dist_bray=0.16776120082488089]	[correl_spearman, dist_kullbackleibler, dist_bray]
12991	12813	Undirected	247	OTU-OTU71->OTU-OTU49		0.63	13049	OTU-OTU71->OTU-OTU49		OTU-OTU71->OTU-OTU49	FALSE		0.000112	0.000539	[6.692309138960196]	3	[6.706104747798298]	[dist_kullbackleibler=copresence, correl_spearman=copresence, dist_bray=copresence]	[dist_kullbackleibler=2.925043113875842	correl_spearman	0.634221	[2.7763801553071827, 0.6259347999944717, 0.4161554804559417]	[1.3197358090629956]	[2.925043113875842, 0.634221419900536, 0.42347816592852705]	[2.6217433910911128, 0.6422782426709746, 0.41928098471174857]	copresence	[2.925043113875842]	[100.0, 100.0, 100.0]	[1.2588222837932757, 0.1294403246113571, 0.06328991863955262]	0.000112	[dist_kullbackleibler=2.3044461558430207E-4, correl_spearman=0.04616717669699599, dist_bray=0.1663865937129343]	[dist_kullbackleibler, correl_spearman, dist_bray]
12991	13000	Undirected	250	OTU-OTU71->OTU-OTU88		0.69	13001	OTU-OTU71->OTU-OTU88		OTU-OTU71->OTU-OTU88	FALSE		1e-06	6e-06	[0.03768114259902988]	3	[0.04788550222729267]	[correl_spearman=copresence, dist_kullbackleibler=copresence, dist_bray=copresence]	[correl_spearman=0.6858138071048716	[correl_spearman	0.685814	[0.6856653932424273, 2.3716316828205843, 0.36751495453659144]	[0.16117721714327737]	[0.6858138071048716, 2.5015062807012205, 0.38344694257978795]	[0.6973859723285907, 2.247016243095432, 0.365062166783131]	copresence	[0.6858138071048716]	[100.0, 100.0, 100.0]	[0.1182244962747781, 1.1218249873646935, 0.06464435232644382]	1e-06	[correl_spearman=0.03180629574311211, dist_kullbackleibler=2.8121249786572378E-6, dist_bray=0.11005662434841157]	[correl_spearman, dist_kullbackleibler, dist_bray]
12991	12842	Undirected	251	OTU-OTU71->OTU-OTU92		0.51	12993	OTU-OTU71->OTU-OTU92		OTU-OTU71->OTU-OTU92	FALSE		0.000258	0.001133	[-0.008426211897408359]	3	[0.009315160467302274]	[correl_spearman=copresence, dist_kullbackleibler=copresence, dist_bray=copresence]	[correl_spearman=0.5109775748623611	[correl_spearman	0.510978	[0.48326519082332614, 3.124407513521039, 0.4298247804575868]	[0.15831343011730822]	[0.5109775748623611, 3.0247198254640275, 0.42716546561480695]	[0.48965318422420356, 3.1610486883150095, 0.41721755763023144]	copresence	[0.5109775748623611]	[100.0, 100.0, 100.0]	[0.13412338843451088, 1.2237165873231153, 0.08236359384095539]	0.000258	[correl_spearman=0.09780902947023784, dist_kullbackleibler=2.3589831612214063E-4, dist_bray=0.19099161185050617]	[correl_spearman, dist_kullbackleibler, dist_bray]
12991	12798	Undirected	252	OTU-OTU71->OTU-OTU98		0.54	12992	OTU-OTU71->OTU-OTU98		OTU-OTU71->OTU-OTU98	FALSE		0	0	[0.881584085971574]	3	[0.8723082863541233]	[dist_bray=mutualExclusion, dist_kullbackleibler=mutualExclusion, correl_spearman=mutualExclusion]	[dist_bray=0.9586121938990679	correl_spearman	-0.537773	[0.9492842579741363, 19.88820585443912, -0.530247398290389]	[0.04903548936271038]	[0.9586121938990679, 20.864046284070273, -0.5377733782785652]	[0.9620527974734363, 20.326709757669327, -0.5525765601813634]	mutualExclusion	[0.9586121938990679]	[86.0, 86.0, 86.0]	[0.03824833661852502, 1.8803009593185565, 0.13555182728552878]	0	[dist_bray=0.3469402607556996, dist_kullbackleibler=1.1943834699046363E-8, correl_spearman=0.08412966932641108]	[dist_bray, dist_kullbackleibler, correl_spearman]
12985	12798	Undirected	258	OTU-OTU103->OTU-OTU98		0.26	13327	OTU-OTU103->OTU-OTU98		OTU-OTU103->OTU-OTU98	FALSE		0.015659	0.044746	[0.9307006066735823]	3	[0.9134146209835329]	[dist_bray=mutualExclusion, dist_kullbackleibler=mutualExclusion, correl_spearman=mutualExclusion]	[dist_bray=0.9584044411290136	correl_spearman	-0.263428	[0.9364449277753255, 18.905134373094285, -0.24187379793272357]	[0.07760841081856895]	[0.9584044411290136, 21.294582134925456, -0.263428081145647]	[0.9561744577591107, 19.879978472170468, -0.2546325620210527]	mutualExclusion	[0.9584044411290136]	[86.0, 86.0, 86.0]	[0.06327182735293481, 3.3705621240731403, 0.15904077019829205]	0.015659	[dist_bray=0.46352475882276056, dist_kullbackleibler=0.00376766868582612, correl_spearman=0.2803978737719164]	[dist_bray, dist_kullbackleibler, correl_spearman]
12985	13089	Undirected	260	OTU-OTU103->OTU-OTU9		0.26	13094	OTU-OTU103->OTU-OTU9		OTU-OTU103->OTU-OTU9	FALSE		0.004756	0.015409	[0.8499003962585754]	3	[0.8338151478701795]	[dist_bray=mutualExclusion, correl_spearman=mutualExclusion, dist_kullbackleibler=mutualExclusion]	[dist_bray=0.8874753003001383	correl_spearman	-0.262161	[0.8765894600285945, -0.25586944000182615, 15.279352715029589]	[0.06731665181650753]	[0.8874753003001383, -0.26216115599128703, 17.147754201286013]	[0.8833858445398668, -0.25427154354359627, 15.132174746492536]	mutualExclusion	[0.8874753003001383]	[100.0, 100.0, 100.0]	[0.04678733358870889, 0.14867709268017987, 2.7123958676810225]	0.004756	[dist_bray=0.4216199073082081, correl_spearman=0.25584331698890583, dist_kullbackleibler=0.0010969603767426728]	[dist_bray, correl_spearman, dist_kullbackleibler]
12985	12785	Undirected	261	OTU-OTU103->OTU-OTU111		0.22	12986	OTU-OTU103->OTU-OTU111		OTU-OTU103->OTU-OTU111	FALSE		0.004354	0.014238	[0.90567139499098]	3	[0.8765221968779734]	[dist_bray=mutualExclusion, dist_kullbackleibler=mutualExclusion, correl_spearman=mutualExclusion]	[dist_bray=0.9337891056985405	correl_spearman	-0.221223	[0.9201998631196335, 17.934308339155155, -0.22854726688116137]	[0.10257797200952323]	[0.9337891056985405, 20.249881845576937, -0.2212229369620971]	[0.9263467069856594, 18.451052278976164, -0.24239916031195796]	mutualExclusion	[0.9337891056985405]	[78.0, 78.0, 78.0]	[0.04111237193345099, 3.1064355245153705, 0.15658008294569165]	0.004354	[dist_bray=0.41472242611761945, dist_kullbackleibler=9.708362542966142E-4, correl_spearman=0.2651083554837036]	[dist_bray, dist_kullbackleibler, correl_spearman]
12969	12862	Undirected	262	OTU-OTU24->OTU-OTU112		0.6	14061	OTU-OTU24->OTU-OTU112		OTU-OTU24->OTU-OTU112	FALSE		0	0	[0.7637628640103471]	3	[0.7448271004078404]	[dist_bray=copresence, correl_spearman=copresence, dist_kullbackleibler=copresence]	[dist_bray=0.40762807013545765	correl_spearman	0.596991	[0.4058493283846836, 0.5685902947814878, 2.408862235645243]	[0.08262549681769525]	[0.40762807013545765, 0.5969912597122707, 2.262827563013928]	[0.3985045534947248, 0.5742432160276951, 2.3711634431991233]	copresence	[0.40762807013545765]	[100.0, 100.0, 100.0]	[0.06124684843280184, 0.12387920126567582, 0.9024184032498945]	0	[dist_bray=0.08538836770816438, correl_spearman=0.05382421023561945, dist_kullbackleibler=1.3837602175215125E-9]	[dist_bray, correl_spearman, dist_kullbackleibler]
12969	12908	Undirected	263	OTU-OTU24->OTU-OTU11		0.3	13764	OTU-OTU24->OTU-OTU11		OTU-OTU24->OTU-OTU11	FALSE		0.000376	0.001574	[0.8408806781028735]	3	[0.8136256090053494]	[dist_bray=copresence, correl_spearman=copresence, dist_kullbackleibler=copresence]	[dist_bray=0.5389970260027622	correl_spearman	0.297199	[0.5458517312998123, 0.2999732286672793, 4.957219233091684]	[0.08265641702864505]	[0.5389970260027622, 0.29719909447855997, 5.199322958253031]	[0.5338561574759764, 0.317703058197761, 5.035031658868922]	copresence	[0.5389970260027622]	[32.0, 32.0, 32.0]	[0.1195153475715556, 0.14687191933684063, 1.7167228927560492]	0.000376	[dist_bray=0.21929916369440727, correl_spearman=0.22488088525667316, dist_kullbackleibler=1.3522341711968977E-4]	[dist_bray, correl_spearman, dist_kullbackleibler]
12969	12895	Undirected	264	OTU-OTU24->OTU-OTU25		0.62	13746	OTU-OTU24->OTU-OTU25		OTU-OTU24->OTU-OTU25	FALSE		0	0	[0.006588011442307024]	3	[0.015216933929345408]	[correl_spearman=copresence, dist_kullbackleibler=copresence, dist_bray=copresence]	[correl_spearman=0.6225670812980137	[correl_spearman	0.622567	[0.5980072982362965, 2.297647246230478, 0.4614213650037247]	[0.15531272470928642]	[0.6225670812980137, 2.2374826507472916, 0.48177365284082874]	[0.6070480939044441, 2.2600549016828326, 0.47069727349695706]	copresence	[0.6225670812980137]	[92.0, 92.0, 92.0]	[0.1082017410607855, 0.7460890905344367, 0.08031656112429501]	0	[correl_spearman=0.03822047304794163, dist_kullbackleibler=3.640365786594657E-11, dist_bray=0.15925897592935556]	[correl_spearman, dist_kullbackleibler, dist_bray]
12969	12789	Undirected	265	OTU-OTU24->OTU-OTU31		0.57	13730	OTU-OTU24->OTU-OTU31		OTU-OTU24->OTU-OTU31	FALSE		0	0	[0.007328192247075977]	3	[-0.0027701887088946663]	[correl_spearman=copresence, dist_kullbackleibler=copresence, dist_bray=copresence]	[correl_spearman=0.5710708372721369	[correl_spearman	0.571071	[0.5482814301784383, 1.6274668194714244, 0.42547854639667176]	[0.1472903640056377]	[0.5710708372721369, 1.6030197459995459, 0.4345510473349976]	[0.5726851696999304, 1.5435312297036083, 0.4320580968808566]	copresence	[0.5710708372721369]	[100.0, 100.0, 100.0]	[0.1297630257275456, 0.39838652962288085, 0.05201052906159922]	0	[correl_spearman=0.06304090769544907, dist_kullbackleibler=1.3291907574597417E-9, dist_bray=0.13537216722326784]	[correl_spearman, dist_kullbackleibler, dist_bray]
12969	12914	Undirected	266	OTU-OTU24->OTU-OTU34		0.54	13729	OTU-OTU24->OTU-OTU34		OTU-OTU24->OTU-OTU34	FALSE		0	0	[5.293985327334534]	3	[5.351414853375962]	[dist_kullbackleibler=copresence, correl_spearman=copresence, dist_bray=copresence]	[dist_kullbackleibler=1.870027503870987	correl_spearman	0.544027	[1.8469855292777957, 0.5223213057285417, 0.48947788558975736]	[1.0069586468844267]	[1.870027503870987, 0.5440272037875606, 0.4990948435249748]	[1.8330781809747327, 0.5277081723537203, 0.4961901394046359]	copresence	[1.870027503870987]	[100.0, 100.0, 100.0]	[0.36893901057504663, 0.13000290899505967, 0.05718654503624886]	0	[dist_kullbackleibler=3.97477784019884E-9, correl_spearman=0.06655857050108915, dist_bray=0.21472491159644802]	[dist_kullbackleibler, correl_spearman, dist_bray]
12969	12922	Undirected	268	OTU-OTU24->OTU-OTU44		0.47	13713	OTU-OTU24->OTU-OTU44		OTU-OTU24->OTU-OTU44	FALSE		3e-06	2.2e-05	[7.863567640658733]	3	[7.667434211609774]	[dist_kullbackleibler=copresence, dist_bray=copresence, correl_spearman=copresence]	[dist_kullbackleibler=3.0564102293037276	correl_spearman	0.466651	[3.2311516726105736, 0.49715475475741927, 0.4517901104259199]	[1.740422998695273]	[3.0564102293037276, 0.4940641453315373, 0.4666508104967475]	[3.1805782228607256, 0.50639303560166, 0.44432630315563254]	copresence	[3.0564102293037276]	[90.0, 90.0, 90.0]	[0.9374989344042212, 0.07100983785579836, 0.12772030531498216]	3e-06	[dist_kullbackleibler=2.30522340172179E-6, dist_bray=0.1717423697127034, correl_spearman=0.10824639870452207]	[dist_kullbackleibler, dist_bray, correl_spearman]
12969	12793	Undirected	270	OTU-OTU24->OTU-OTU52		0.31	13697	OTU-OTU24->OTU-OTU52		OTU-OTU24->OTU-OTU52	FALSE		6.2e-05	0.000317	[-0.016644613365531045]	3	[-0.0046955678659420606]	[correl_spearman=copresence, dist_bray=copresence, dist_kullbackleibler=copresence]	[correl_spearman=0.30734626031620743	[correl_spearman	0.307346	[0.30421652876375016, 0.6064872367304366, 2.7831886349807076]	[0.15817430490291168]	[0.30734626031620743, 0.6152815164731713, 2.809289424678218]	[0.31702884348401045, 0.6058128913086247, 2.7505240309146495]	copresence	[0.30734626031620743]	[100.0, 100.0, 100.0]	[0.14408169951090893, 0.0607934107107009, 0.5119445072244388]	6.2e-05	[correl_spearman=0.20787288632781298, dist_bray=0.3954075614750956, dist_kullbackleibler=1.139705900010668E-5]	[correl_spearman, dist_bray, dist_kullbackleibler]
12969	12903	Undirected	271	OTU-OTU24->OTU-OTU56		0.36	13696	OTU-OTU24->OTU-OTU56		OTU-OTU24->OTU-OTU56	FALSE		0.000164	0.000761	[0.8040805495355235]	3	[0.7922510701937645]	[dist_bray=copresence, dist_kullbackleibler=copresence, correl_spearman=copresence]	[dist_bray=0.5733864783362826	correl_spearman	0.363257	[0.5424783659454363, 4.4924561551160656, 0.3751867180925341]	[0.06647593650906937]	[0.5733864783362826, 4.875623517425329, 0.36325688488361235]	[0.541772770052977, 4.478934608416147, 0.3802812196467078]	copresence	[0.5733864783362826]	[66.0, 66.0, 66.0]	[0.09186928221907893, 1.5554279280390522, 0.13027854890227508]	0.000164	[dist_bray=0.20495220489874777, dist_kullbackleibler=8.725382136631765E-5, correl_spearman=0.15017185717754472]	[dist_bray, dist_kullbackleibler, correl_spearman]
12969	12858	Undirected	273	OTU-OTU24->OTU-OTU64		0.63	13682	OTU-OTU24->OTU-OTU64		OTU-OTU24->OTU-OTU64	FALSE		0	0	[7.9881018450793135]	3	[8.126135638005652]	[dist_kullbackleibler=copresence, correl_spearman=copresence, dist_bray=copresence]	[dist_kullbackleibler=2.615671404233482	correl_spearman	0.634102	[2.6087334173527785, 0.6143791179589352, 0.528603964326636]	[2.216896044203543]	[2.615671404233482, 0.6341016898048244, 0.5233428698579978]	[2.6599611254770146, 0.6304507188683812, 0.5332346868427245]	copresence	[2.615671404233482]	[100.0, 100.0, 100.0]	[0.7089911609567192, 0.1135749758305849, 0.09523825828921552]	0	[dist_kullbackleibler=2.8270275009845136E-11, correl_spearman=0.03100135119464703, dist_bray=0.23104187517730446]	[dist_kullbackleibler, correl_spearman, dist_bray]
12969	12773	Undirected	274	OTU-OTU24->OTU-OTU65		0.26	13680	OTU-OTU24->OTU-OTU65		OTU-OTU24->OTU-OTU65	FALSE		0.016323	0.046304	[0.011839168574465897]	3	[-0.0017510626574210048]	[correl_spearman=copresence, dist_kullbackleibler=copresence, dist_bray=copresence]	[correl_spearman=0.26428994278807705	[correl_spearman	0.26429	[0.24041557934206179, 5.694833327803573, 0.6205119075428216]	[0.1530732337069782]	[0.26428994278807705, 5.50884087076191, 0.6031812084196548]	[0.27106726138362724, 5.610745136191824, 0.6161708428542705]	copresence	[0.26428994278807705]	[44.0, 44.0, 44.0]	[0.17113121887149613, 1.578694723665949, 0.10421293823672056]	0.016323	[correl_spearman=0.27914076274620214, dist_kullbackleibler=0.006239448649029811, dist_bray=0.2957749225881867]	[correl_spearman, dist_kullbackleibler, dist_bray]
12969	12822	Undirected	275	OTU-OTU24->OTU-OTU87		0.31	13644	OTU-OTU24->OTU-OTU87		OTU-OTU24->OTU-OTU87	FALSE		7e-05	0.000355	[5.985453577904301]	3	[6.189945466358653]	[dist_kullbackleibler=copresence, dist_bray=copresence, correl_spearman=copresence]	[dist_kullbackleibler=3.0941134856433226	correl_spearman	0.312795	[3.0316205240208234, 0.6060337643709207, 0.30403103896989214]	[1.6638660609710199]	[3.0941134856433226, 0.6060241194648849, 0.3127953443660011]	[2.990979254622922, 0.6150977248173688, 0.3099153862132884]	copresence	[3.0941134856433226]	[100.0, 100.0, 100.0]	[0.5638997117988608, 0.07556959428609335, 0.16236872213004389]	7e-05	[dist_kullbackleibler=1.3003969313030161E-5, dist_bray=0.36862163005153614, correl_spearman=0.22303092952523118]	[dist_kullbackleibler, dist_bray, correl_spearman]
12969	12798	Undirected	276	OTU-OTU24->OTU-OTU98		0.34	13628	OTU-OTU24->OTU-OTU98		OTU-OTU24->OTU-OTU98	FALSE		0.000104	0.000506	[-0.027849632703050423]	3	[-0.014685111324318476]	[correl_spearman=mutualExclusion, dist_bray=mutualExclusion, dist_kullbackleibler=mutualExclusion]	[correl_spearman=-0.3386515336690932	[correl_spearman	-0.338652	[-0.3375663535437058, 0.9232107364016267, 19.04428945818925]	[0.14708565986499603]	[-0.3386515336690932, 0.937256701197934, 20.367794499811943]	[-0.3569685186525898, 0.9311576816838175, 19.47559397070477]	mutualExclusion	[-0.3386515336690932]	[86.0, 86.0, 86.0]	[0.14831204159282624, 0.04710218725727256, 2.7540457084014442]	0.000104	[correl_spearman=0.20090123514135616, dist_bray=0.40672523659477555, dist_kullbackleibler=1.9989119410812606E-5]	[correl_spearman, dist_bray, dist_kullbackleibler]
12955	12789	Undirected	277	OTU-OTU15->OTU-OTU31		0.31	14060	OTU-OTU15->OTU-OTU31		OTU-OTU15->OTU-OTU31	FALSE		0.007981	0.024457	[6.403448599757455]	3	[6.533572722893307]	[dist_kullbackleibler=copresence, correl_spearman=copresence, dist_bray=copresence]	[dist_kullbackleibler=4.299353801696378	correl_spearman	0.31325	[4.030510289271322, 0.3249518372242229, 0.6053732184407227]	[1.306414617081213]	[4.299353801696378, 0.3132500953308026, 0.6340954812062157]	[4.061559080180125, 0.31516596512097184, 0.6020575397573636]	copresence	[4.299353801696378]	[84.0, 84.0, 84.0]	[0.8143079619628588, 0.1546710273058208, 0.04990632739461332]	0.007981	[dist_kullbackleibler=0.0027701669146845687, correl_spearman=0.20743364080045562, dist_bray=0.37882113981970333]	[dist_kullbackleibler, correl_spearman, dist_bray]
12955	13046	Undirected	278	OTU-OTU15->OTU-OTU33		0.44	14059	OTU-OTU15->OTU-OTU33		OTU-OTU15->OTU-OTU33	FALSE		0.00075	0.002909	[7.466050351978123]	3	[7.550777563329927]	[dist_kullbackleibler=copresence, dist_bray=copresence, correl_spearman=copresence]	[dist_kullbackleibler=4.451237189799587	correl_spearman	0.441059	[4.251870791897576, 0.5292723864695545, 0.42724603131282707]	[1.3823892680695504]	[4.451237189799587, 0.5358782424614825, 0.44105945528521795]	[4.353915088246366, 0.5378356946905365, 0.431579530341753]	copresence	[4.451237189799587]	[84.0, 84.0, 84.0]	[0.9765241576319772, 0.06844537563198255, 0.13559779216298976]	0.00075	[dist_kullbackleibler=4.214263109548755E-4, dist_bray=0.27290995656636274, correl_spearman=0.12504154193190475]	[dist_kullbackleibler, dist_bray, correl_spearman]
12955	12766	Undirected	279	OTU-OTU15->OTU-OTU42		0.33	14049	OTU-OTU15->OTU-OTU42		OTU-OTU15->OTU-OTU42	FALSE		0.001065	0.003986	[-0.024841038712594264]	3	[-0.021166940778675262]	[correl_spearman=copresence, dist_kullbackleibler=copresence, dist_bray=copresence]	[correl_spearman=0.3341486557626604	[correl_spearman	0.334149	[0.3357403135134523, 4.544954197249052, 0.590449427348323]	[0.1550748683822401]	[0.3341486557626604, 4.785085979370924, 0.6028729309225506]	[0.3234424560373881, 4.402910754384471, 0.5932665172944656]	copresence	[0.3341486557626604]	[84.0, 84.0, 84.0]	[0.1416092357460031, 1.050667091198142, 0.06419620099071593]	0.001065	[correl_spearman=0.17145290549409792, dist_kullbackleibler=3.5760830841080615E-4, dist_bray=0.34733945528911936]	[correl_spearman, dist_kullbackleibler, dist_bray]
12955	12767	Undirected	280	OTU-OTU15->OTU-OTU43		0.41	14048	OTU-OTU15->OTU-OTU43		OTU-OTU15->OTU-OTU43	FALSE		0.001094	0.004093	[8.384882318539361]	3	[8.484734438217338]	[dist_kullbackleibler=copresence, correl_spearman=copresence, dist_bray=copresence]	[dist_kullbackleibler=4.9960481059916955	correl_spearman	0.405363	[4.539946888524864, 0.42025037111794167, 0.5776305267636999]	[1.4709989271896489]	[4.9960481059916955, 0.4053633198356111, 0.6033431843159616]	[4.2990411942279545, 0.43462169360753133, 0.5805885730847347]	copresence	[4.9960481059916955]	[84.0, 84.0, 84.0]	[1.4124352267769726, 0.15503215661930805, 0.07004262136331713]	0.001094	[dist_kullbackleibler=4.513055192001403E-4, correl_spearman=0.1407010195827752, dist_bray=0.3459282756945907]	[dist_kullbackleibler, correl_spearman, dist_bray]
12955	12998	Undirected	281	OTU-OTU15->OTU-OTU48		0.42	14047	OTU-OTU15->OTU-OTU48		OTU-OTU15->OTU-OTU48	FALSE		8.7e-05	0.000428	[7.577462513408872]	3	[7.600629806039086]	[dist_kullbackleibler=copresence, dist_bray=copresence, correl_spearman=copresence]	[dist_kullbackleibler=4.110501757361573	correl_spearman	0.423995	[3.9199082480438254, 0.5211861410116032, 0.41266128806247765]	[1.610345153130503]	[4.110501757361573, 0.5252814690374394, 0.4239948933181224]	[4.011187026627116, 0.5220366275914818, 0.40329679622334985]	copresence	[4.110501757361573]	[84.0, 84.0, 84.0]	[0.8735761284454474, 0.0643430284499624, 0.14104148203939015]	8.7e-05	[dist_kullbackleibler=4.107112929307988E-5, dist_bray=0.2853169013032135, correl_spearman=0.11433253174325447]	[dist_kullbackleibler, dist_bray, correl_spearman]
12955	12886	Undirected	282	OTU-OTU15->OTU-OTU54		0.42	14035	OTU-OTU15->OTU-OTU54		OTU-OTU15->OTU-OTU54	FALSE		0.004594	0.014953	[0.6836332561357515]	3	[0.6766397203086625]	[dist_bray=mutualExclusion, correl_spearman=mutualExclusion, dist_kullbackleibler=mutualExclusion]	[dist_bray=0.8040572837123044	correl_spearman	-0.422672	[0.7901555092868329, -0.4363141019022318, 8.182111258933823]	[0.04927322198338237]	[0.8040572837123044, -0.42267186960567765, 8.457345587214636]	[0.7945922681620847, -0.43442543232100456, 8.204126201090556]	mutualExclusion	[0.8040572837123044]	[84.0, 84.0, 84.0]	[0.05197053585675226, 0.13437256801695938, 0.7140615938183024]	0.004594	[dist_bray=0.30926289986956434, correl_spearman=0.1275204021603229, dist_kullbackleibler=0.0028812845326555703]	[dist_bray, correl_spearman, dist_kullbackleibler]
12955	13000	Undirected	283	OTU-OTU15->OTU-OTU88		0.63	13993	OTU-OTU15->OTU-OTU88		OTU-OTU15->OTU-OTU88	FALSE		0	0	[0.014007964739576259]	3	[0.01796219275565664]	[correl_spearman=copresence, dist_bray=copresence, dist_kullbackleibler=copresence]	[correl_spearman=0.6290073913009725	[correl_spearman	0.629007	[0.6224665085299188, 0.4621184023838809, 3.0003525107907953]	[0.13561914064404856]	[0.6290073913009725, 0.47932503569470586, 3.2493143332806467]	[0.6404161920003564, 0.4580118211122632, 3.0741891727432753]	copresence	[0.6290073913009725]	[84.0, 84.0, 84.0]	[0.12189353435535645, 0.06482775053214143, 0.9887744414955321]	0	[correl_spearman=0.041686081668858566, dist_bray=0.1713334849683733, dist_kullbackleibler=4.567154698875697E-8]	[correl_spearman, dist_bray, dist_kullbackleibler]
12955	12798	Undirected	284	OTU-OTU15->OTU-OTU98		0.26	13983	OTU-OTU15->OTU-OTU98		OTU-OTU15->OTU-OTU98	FALSE		0.009013	0.027301	[14.062818216450516]	3	[13.78425143259706]	[dist_kullbackleibler=mutualExclusion, correl_spearman=mutualExclusion, dist_bray=mutualExclusion]	[dist_kullbackleibler=17.61571631965834	correl_spearman	-0.26393	[17.127957375629958, -0.27239331357644964, 0.9751906116029975]	[2.9614107198086197]	[17.61571631965834, -0.2639296187683283, 0.9844632731215247]	[17.281392705778973, -0.2892224220517562, 0.9838912315820352]	mutualExclusion	[17.61571631965834]	[70.0, 70.0, 70.0]	[1.5202023347749205, 0.155491950117392, 0.02662230338775183]	0.009013	[dist_kullbackleibler=0.003344704914687191, correl_spearman=0.2524842775073384, dist_bray=0.29793187529363396]	[dist_kullbackleibler, correl_spearman, dist_bray]
12955	12804	Undirected	285	OTU-OTU15->OTU-OTU100		0.41	13428	OTU-OTU15->OTU-OTU100		OTU-OTU15->OTU-OTU100	FALSE		0.000198	0.000893	[-0.0015023413004803844]	3	[0.00525330320791234]	[correl_spearman=copresence, dist_bray=copresence, dist_kullbackleibler=copresence]	[correl_spearman=0.41017411320092356	[correl_spearman	0.410174	[0.41106449436082576, 0.5795139437369586, 4.247265340271717]	[0.14254971298530195]	[0.41017411320092356, 0.6028324433762393, 4.501223321476113]	[0.40909178944900304, 0.5813164016196402, 4.137172223554293]	copresence	[0.41017411320092356]	[84.0, 84.0, 84.0]	[0.13748570751005632, 0.07933945926864772, 1.1490607832894988]	0.000198	[correl_spearman=0.1368792095376587, dist_bray=0.316031295144394, dist_kullbackleibler=7.632255116662989E-5]	[correl_spearman, dist_bray, dist_kullbackleibler]
12955	12787	Undirected	286	OTU-OTU15->OTU-OTU110		0.38	13410	OTU-OTU15->OTU-OTU110		OTU-OTU15->OTU-OTU110	FALSE		0.012319	0.035815	[4.864687746201486E-4]	3	[-0.0033594143664482847]	[correl_spearman=mutualExclusion, dist_kullbackleibler=mutualExclusion, dist_bray=mutualExclusion]	[correl_spearman=-0.38361537655760286	[correl_spearman	-0.383615	[-0.3900520567647513, 9.619609857667689, 0.8280786785645253]	[0.13975862787970866]	[-0.38361537655760286, 9.864778005438579, 0.830332707110495]	[-0.3974262440429973, 9.632729104093883, 0.8352035511232567]	mutualExclusion	[-0.38361537655760286]	[84.0, 84.0, 84.0]	[0.14640495461246944, 1.0522239006686862, 0.05844952857975634]	0.012319	[correl_spearman=0.15609909570391778, dist_kullbackleibler=0.007795917726768686, dist_bray=0.3008013295287464]	[correl_spearman, dist_kullbackleibler, dist_bray]
12943	12801	Undirected	288	OTU-OTU35->OTU-OTU12		0.44	13859	OTU-OTU35->OTU-OTU12		OTU-OTU35->OTU-OTU12	FALSE		0.003846	0.012743	[-0.07362191523827882]	3	[-0.050720154682611145]	[correl_spearman=copresence, dist_bray=copresence, dist_kullbackleibler=copresence]	[correl_spearman=0.44311082473624486	[correl_spearman	0.443111	[0.45269713858758165, 0.4893738717585724, 3.164424312717296]	[0.15407660003760296]	[0.44311082473624486, 0.4999624598334549, 3.3329938557499834]	[0.46011521942649175, 0.4891041881385554, 3.2073589464639944]	copresence	[0.44311082473624486]	[88.0, 88.0, 88.0]	[0.1186081827610666, 0.06291985146298623, 0.6310183414881305]	0.003846	[correl_spearman=0.07190592536311063, dist_bray=0.31169150975463233, dist_kullbackleibler=0.004122733602557993]	[correl_spearman, dist_bray, dist_kullbackleibler]
12943	12955	Undirected	289	OTU-OTU35->OTU-OTU15		0.48	13858	OTU-OTU35->OTU-OTU15		OTU-OTU35->OTU-OTU15	FALSE		0.001252	0.00462	[5.526238863685659]	3	[5.569581903860612]	[dist_kullbackleibler=copresence, correl_spearman=copresence, dist_bray=copresence]	[dist_kullbackleibler=3.4199833956291	correl_spearman	0.48216	[3.1234054595804737, 0.497696371004194, 0.43485980802194607]	[0.6674874878941329]	[3.4199833956291, 0.4821600511877987, 0.4508133080417974]	[3.141583761395338, 0.5017597134574064, 0.43600889451598857]	copresence	[3.4199833956291]	[84.0, 84.0, 84.0]	[0.6885943401594293, 0.13450517970676543, 0.0629631527866106]	0.001252	[dist_kullbackleibler=0.001599937759436676, correl_spearman=0.07340306282596709, dist_bray=0.217755018641822]	[dist_kullbackleibler, correl_spearman, dist_bray]
12943	12969	Undirected	290	OTU-OTU35->OTU-OTU24		0.51	13850	OTU-OTU35->OTU-OTU24		OTU-OTU35->OTU-OTU24	FALSE		0.002897	0.009877	[0.6382486483641874]	3	[0.6344503457795831]	[dist_bray=copresence, dist_kullbackleibler=copresence, correl_spearman=copresence]	[dist_bray=0.5317815923670184	correl_spearman	0.513068	[0.5123004014475596, 2.2596834146559797, 0.4852754788312471]	[0.03893249019933103]	[0.5317815923670184, 2.338714551303618, 0.5130684578731337]	[0.5186353370619172, 2.2753072714906875, 0.48811008099383923]	copresence	[0.5317815923670184]	[100.0, 100.0, 100.0]	[0.051562554953721314, 0.5131796651403355, 0.12987245124020114]	0.002897	[dist_bray=0.29531256244910087, dist_kullbackleibler=0.003440266844696671, correl_spearman=0.06552088938944822]	[dist_bray, dist_kullbackleibler, correl_spearman]
12943	12895	Undirected	291	OTU-OTU35->OTU-OTU25		0.63	13849	OTU-OTU35->OTU-OTU25		OTU-OTU35->OTU-OTU25	FALSE		5.1e-05	0.000262	[5.456472184899361]	3	[5.500689121188367]	[dist_kullbackleibler=copresence, correl_spearman=copresence, dist_bray=copresence]	[dist_kullbackleibler=2.7581283159930328	correl_spearman	0.632788	[2.6759618986379974, 0.6229949177638455, 0.4532220256813617]	[0.7403313931270553]	[2.7581283159930328, 0.632788413066351, 0.46602935309867666]	[2.651490206206005, 0.6399641972060102, 0.4628464088529446]	copresence	[2.7581283159930328]	[92.0, 92.0, 92.0]	[0.5892959909149426, 0.11105425931304294, 0.06334810957677335]	5.1e-05	[dist_kullbackleibler=1.167644907353882E-4, correl_spearman=0.027817093519768632, dist_bray=0.23103997810174937]	[dist_kullbackleibler, correl_spearman, dist_bray]
12943	12789	Undirected	292	OTU-OTU35->OTU-OTU31		0.61	13840	OTU-OTU35->OTU-OTU31		OTU-OTU35->OTU-OTU31	FALSE		1.7e-05	9.5e-05	[-0.10902801250800066]	3	[-0.08555124022870164]	[correl_spearman=copresence, dist_bray=copresence, dist_kullbackleibler=copresence]	[correl_spearman=0.6057331465539693	[correl_spearman	0.605733	[0.5913449913902535, 0.34234848777206073, 0.854362999135324]	[0.13953579832605434]	[0.6057331465539693, 0.3533446025040763, 0.869421808150287]	[0.5997315897548267, 0.3481148385061496, 0.7919263965880726]	copresence	[0.6057331465539693]	[100.0, 100.0, 100.0]	[0.12871236687631782, 0.04060482031209369, 0.2514948532610965]	1.7e-05	[correl_spearman=0.0295976812634966, dist_bray=0.24087912965328118, dist_kullbackleibler=3.297290339365766E-5]	[correl_spearman, dist_bray, dist_kullbackleibler]
12943	13046	Undirected	293	OTU-OTU35->OTU-OTU33		0.7	13839	OTU-OTU35->OTU-OTU33		OTU-OTU35->OTU-OTU33	FALSE		0	0	[3.7704581187398802]	3	[3.8375665803933274]	[dist_kullbackleibler=copresence, dist_bray=copresence, correl_spearman=copresence]	[dist_kullbackleibler=1.0286051165751673	correl_spearman	0.703107	[1.008621187486766, 0.3478355475180426, 0.7015600536701436]	[0.6331644692074105]	[1.0286051165751673, 0.35177966043427533, 0.7031070368223254]	[1.013102097165812, 0.34717866763844746, 0.7064638440910891]	copresence	[1.0286051165751673]	[100.0, 100.0, 100.0]	[0.19143003000786363, 0.04673148422051785, 0.09900223558275553]	0	[dist_kullbackleibler=5.0395687622994956E-11, dist_bray=0.21072800829500482, correl_spearman=0.007777844276404655]	[dist_kullbackleibler, dist_bray, correl_spearman]
12943	12914	Undirected	294	OTU-OTU35->OTU-OTU34		0.64	13838	OTU-OTU35->OTU-OTU34		OTU-OTU35->OTU-OTU34	FALSE		0	1e-06	[-0.09118461009456877]	3	[-0.09666622827366426]	[correl_spearman=copresence, dist_kullbackleibler=copresence, dist_bray=copresence]	[correl_spearman=0.6434312877048834	[correl_spearman	0.643431	[0.6311443951867441, 0.7934718024662107, 0.3270718315210812]	[0.1429306843586011]	[0.6434312877048834, 0.7946167245218883, 0.3234674806705585]	[0.6521473315887888, 0.7949972565522624, 0.3281780332203994]	copresence	[0.6434312877048834]	[100.0, 100.0, 100.0]	[0.1270910263514318, 0.1667498778784414, 0.042823172648023884]	0	[correl_spearman=0.020597878529283575, dist_kullbackleibler=3.6917184298435046E-7, dist_bray=0.18255267672632236]	[correl_spearman, dist_kullbackleibler, dist_bray]
12943	12767	Undirected	295	OTU-OTU35->OTU-OTU43		0.33	13825	OTU-OTU35->OTU-OTU43		OTU-OTU35->OTU-OTU43	FALSE		0.016583	0.046855	[-0.06182970772155237]	3	[-0.060366923836792756]	[correl_spearman=copresence, dist_kullbackleibler=copresence, dist_bray=copresence]	[correl_spearman=0.3257403002636001	[correl_spearman	0.32574	[0.3277754590994337, 2.630269190119475, 0.4326448740540874]	[0.1551583273445492]	[0.3257403002636001, 2.7815588322133937, 0.4393587669605491]	[0.31962365997479547, 2.5850574147298624, 0.43125983143859326]	copresence	[0.3257403002636001]	[98.0, 98.0, 98.0]	[0.15007432919383107, 0.6197379455022594, 0.04722001111254515]	0.016583	[correl_spearman=0.15818843261524151, dist_kullbackleibler=0.009519164453619666, dist_bray=0.3487907600835092]	[correl_spearman, dist_kullbackleibler, dist_bray]
12943	12920	Undirected	296	OTU-OTU35->OTU-OTU46		0.52	13824	OTU-OTU35->OTU-OTU46		OTU-OTU35->OTU-OTU46	FALSE		0.000762	0.002948	[4.665767034909741]	3	[4.66518312047277]	[dist_kullbackleibler=copresence, correl_spearman=copresence, dist_bray=copresence]	[dist_kullbackleibler=2.495185234129502	correl_spearman	0.516333	[2.4630314037031424, 0.5060702299895724, 0.4692557387355473]	[0.6969598418372362]	[2.495185234129502, 0.5163327869576163, 0.46851588821167145]	[2.44711902513787, 0.512282197894086, 0.4721157785228062]	copresence	[2.495185234129502]	[98.0, 98.0, 98.0]	[0.5207187401078702, 0.11104808131916648, 0.04954273009010071]	0.000762	[dist_kullbackleibler=0.0011376459427847596, correl_spearman=0.04407757953112085, dist_bray=0.2917821301916438]	[dist_kullbackleibler, correl_spearman, dist_bray]
12943	12998	Undirected	297	OTU-OTU35->OTU-OTU48		0.71	13823	OTU-OTU35->OTU-OTU48		OTU-OTU35->OTU-OTU48	FALSE		0	0	[3.540401314317429]	3	[3.6031534653605632]	[dist_kullbackleibler=copresence, dist_bray=copresence, correl_spearman=copresence]	[dist_kullbackleibler=0.9066448975239763	correl_spearman	0.705359	[0.9000501892798571, 0.3258067306434404, 0.7028081721330629]	[0.6741009745570063]	[0.9066448975239763, 0.3286797972772204, 0.7053590848061448]	[0.9053807478482553, 0.3289579408790986, 0.713972661726499]	copresence	[0.9066448975239763]	[100.0, 100.0, 100.0]	[0.20659974194917546, 0.05318665981036115, 0.09222891998199578]	0	[dist_kullbackleibler=1.365528357055723E-9, dist_bray=0.22907704213234026, correl_spearman=0.002622125793150021]	[dist_kullbackleibler, dist_bray, correl_spearman]
12943	13104	Undirected	298	OTU-OTU35->OTU-OTU59		0.41	13817	OTU-OTU35->OTU-OTU59		OTU-OTU35->OTU-OTU59	FALSE		0.004226	0.013857	[-0.02380782335707555]	3	[-0.011311972483823866]	[correl_spearman=copresence, dist_bray=copresence, dist_kullbackleibler=copresence]	[correl_spearman=0.41001558401577526	[correl_spearman	0.410016	[0.38100326435285453, 0.6028042424736674, 4.658881149248484]	[0.12175183442562729]	[0.41001558401577526, 0.6153170392863095, 5.045512384226691]	[0.42176560207277597, 0.6089373276433216, 4.703663270378556]	copresence	[0.41001558401577526]	[4.0, 4.0, 4.0]	[0.14837273265323198, 0.04859643568158893, 0.5929634487212514]	0.004226	[correl_spearman=0.15422181859272216, dist_bray=0.3434034454456605, dist_kullbackleibler=0.0019465751033758139]	[correl_spearman, dist_bray, dist_kullbackleibler]
12943	12858	Undirected	299	OTU-OTU35->OTU-OTU64		0.59	13803	OTU-OTU35->OTU-OTU64		OTU-OTU35->OTU-OTU64	FALSE		0.000332	0.001413	[-0.06608034230728746]	3	[-0.05580354880940739]	[correl_spearman=copresence, dist_kullbackleibler=copresence, dist_bray=copresence]	[correl_spearman=0.5905222113757193	[correl_spearman	0.590522	[0.5817376402225394, 2.9513061380242123, 0.5182785021637766]	[0.15488739169824778]	[0.5905222113757193, 3.0048060979044715, 0.5278036817244462]	[0.5933888463302253, 3.005839167780084, 0.5235083059476178]	copresence	[0.5905222113757193]	[100.0, 100.0, 100.0]	[0.1252322057585896, 0.6798293058602036, 0.05591822125749221]	0.000332	[correl_spearman=0.03580683900942033, dist_kullbackleibler=6.033416512254419E-4, dist_bray=0.26907034219075787]	[correl_spearman, dist_kullbackleibler, dist_bray]
12943	13000	Undirected	300	OTU-OTU35->OTU-OTU88		0.6	13782	OTU-OTU35->OTU-OTU88		OTU-OTU35->OTU-OTU88	FALSE		8e-06	4.7e-05	[4.543431364241563]	3	[4.653065554965412]	[dist_kullbackleibler=copresence, correl_spearman=copresence, dist_bray=copresence]	[dist_kullbackleibler=1.9857650961092983	correl_spearman	0.604202	[1.930979721526098, 0.6105064662906985, 0.40866519625709136]	[0.7095349162745227]	[1.9857650961092983, 0.6042017251573457, 0.41587259112439423]	[1.915004868199726, 0.6188915191678036, 0.4100995822796901]	copresence	[1.9857650961092983]	[100.0, 100.0, 100.0]	[0.4285438781354416, 0.11340511342375481, 0.053961195105737714]	8e-06	[dist_kullbackleibler=1.6039067473938573E-5, correl_spearman=0.026343706328721572, dist_bray=0.24281329590012368]	[dist_kullbackleibler, correl_spearman, dist_bray]
12943	12798	Undirected	301	OTU-OTU35->OTU-OTU98		0.57	13776	OTU-OTU35->OTU-OTU98		OTU-OTU35->OTU-OTU98	FALSE		0.002199	0.007668	[-0.04357370309811902]	3	[-0.021608942968627004]	[correl_spearman=mutualExclusion, dist_bray=mutualExclusion, dist_kullbackleibler=mutualExclusion]	[correl_spearman=-0.5695854395409625	[correl_spearman	-0.569585	[-0.5515462900487347, 0.9270176626154467, 13.203196818637823]	[0.14151983078105468]	[-0.5695854395409625, 0.9360784988782886, 13.918784654801048]	[-0.5617993116855698, 0.9336204906185049, 13.62011814650221]	mutualExclusion	[-0.5695854395409625]	[86.0, 86.0, 86.0]	[0.11134510844944816, 0.0400490110778115, 1.6536134896752697]	0.002199	[correl_spearman=0.056127271553316094, dist_bray=0.3238697315754312, dist_kullbackleibler=0.00266811095109043]	[correl_spearman, dist_bray, dist_kullbackleibler]
12943	12802	Undirected	302	OTU-OTU35->OTU-OTU101		0.41	13279	OTU-OTU35->OTU-OTU101		OTU-OTU35->OTU-OTU101	FALSE		0.003736	0.012437	[4.282923582140783]	3	[4.319512092634683]	[dist_kullbackleibler=copresence, correl_spearman=copresence, dist_bray=copresence]	[dist_kullbackleibler=2.3835347875833635	correl_spearman	0.41269	[2.329557999156048, 0.3996393561220075, 0.4555083159085094]	[0.7586756568065827]	[2.3835347875833635, 0.41269032426097574, 0.45970896672079953]	[2.377683676681171, 0.4099480699557777, 0.45741373535423124]	copresence	[2.3835347875833635]	[100.0, 100.0, 100.0]	[0.485556800735074, 0.15152795089316373, 0.04083510350696714]	0.003736	[dist_kullbackleibler=0.0021466385309298897, correl_spearman=0.12738715626298325, dist_bray=0.3267014894693834]	[dist_kullbackleibler, correl_spearman, dist_bray]
12943	12862	Undirected	303	OTU-OTU35->OTU-OTU112		0.55	13254	OTU-OTU35->OTU-OTU112		OTU-OTU35->OTU-OTU112	FALSE		0.001201	0.004462	[-0.018326816241585997]	3	[-0.03735727520894384]	[correl_spearman=copresence, dist_bray=copresence, dist_kullbackleibler=copresence]	[correl_spearman=0.5515435282048108	[correl_spearman	0.551544	[0.5265927926205489, 0.4460073028291559, 2.933048710563696]	[0.14580569886953834]	[0.5515435282048108, 0.4493581385271651, 2.9025608068229554]	[0.5571043054252065, 0.4484638318657649, 2.9748164948461353]	copresence	[0.5515435282048108]	[100.0, 100.0, 100.0]	[0.12982528650314706, 0.04630290468252297, 0.7192061792452523]	0.001201	[correl_spearman=0.058771740912410775, dist_bray=0.17732584273739205, dist_kullbackleibler=0.0023401531723299396]	[correl_spearman, dist_bray, dist_kullbackleibler]
12943	12896	Undirected	304	OTU-OTU35->OTU-OTU1		0.43	13206	OTU-OTU35->OTU-OTU1		OTU-OTU35->OTU-OTU1	FALSE		0.004645	0.015082	[5.337845704482637]	3	[5.37332822375918]	[dist_kullbackleibler=copresence, correl_spearman=copresence, dist_bray=copresence]	[dist_kullbackleibler=3.350741374573415	correl_spearman	0.429219	[3.3200450205859715, 0.41030347188479244, 0.567314444924591]	[0.8554865029397218]	[3.350741374573415, 0.42921871581511384, 0.5724199602884901]	[3.3254491670174624, 0.40532786941191656, 0.5711974956803914]	copresence	[3.350741374573415]	[96.0, 96.0, 96.0]	[0.5690266969170852, 0.12723455402804693, 0.04265615359197564]	0.004645	[dist_kullbackleibler=0.0032447509671706953, correl_spearman=0.09382302636934092, dist_bray=0.3780551890626691]	[dist_kullbackleibler, correl_spearman, dist_bray]
12937	12787	Undirected	305	OTU-OTU97->OTU-OTU110		0.52	13085	OTU-OTU97->OTU-OTU110		OTU-OTU97->OTU-OTU110	FALSE		0.006357	0.020005	[9.169316317837955]	3	[9.36067904738128]	[dist_kullbackleibler=mutualExclusion, correl_spearman=mutualExclusion, dist_bray=mutualExclusion]	[dist_kullbackleibler=13.377290360084697	correl_spearman	-0.517994	[12.161662913792942, -0.5026825596099992, 0.9258209746500862]	[2.0027624339808514]	[13.377290360084697, -0.5179939268036529, 0.9458634763100959]	[12.644365111769208, -0.4976692913096913, 0.9320607555883491]	mutualExclusion	[13.377290360084697]	[36.0, 36.0, 36.0]	[1.3575721960334204, 0.11467199030319603, 0.026665349839721957]	0.006357	[dist_kullbackleibler=0.00810904025758985, correl_spearman=0.06230720883302088, dist_bray=0.3291827949224889]	[dist_kullbackleibler, correl_spearman, dist_bray]
12937	12798	Undirected	307	OTU-OTU97->OTU-OTU98		0.13	12994	OTU-OTU97->OTU-OTU98		OTU-OTU97->OTU-OTU98	FALSE		0.008619	0.026232	[0.9567136966597565]	3	[0.9270124003256052]	[dist_bray=mutualExclusion, dist_kullbackleibler=mutualExclusion, correl_spearman=mutualExclusion]	[dist_bray=0.9818777768002167	correl_spearman	-0.126145	[0.9704998116229546, 20.474033309987053, -0.1233688981233622]	[0.08839585515989752]	[0.9818777768002167, 23.14680961826058, -0.12614532395995712]	[0.976620589509408, 21.682088715797008, -0.15011261821387262]	mutualExclusion	[0.9818777768002167]	[28.0, 28.0, 28.0]	[0.020591377791332573, 3.1517208099559886, 0.15008418287955874]	0.008619	[dist_bray=0.3809241334404043, dist_kullbackleibler=0.0016344757689003009, correl_spearman=0.3831654324626873]	[dist_bray, dist_kullbackleibler, correl_spearman]
12931	13011	Undirected	308	OTU-OTU28->OTU-OTU7		0.6	14014	OTU-OTU28->OTU-OTU7		OTU-OTU28->OTU-OTU7	FALSE		0	0	[-0.006619355976441034]	3	[-8.95559926224373E-4]	[correl_spearman=copresence, dist_kullbackleibler=copresence, dist_bray=copresence]	[correl_spearman=0.5994233909361094	[correl_spearman	0.599423	[0.604939012672298, 3.7515720275967044, 0.5925100375883382]	[0.1635476610156817]	[0.5994233909361094, 3.951868427231285, 0.6002652780518389]	[0.6172645853284654, 3.663042657024171, 0.5939988302274185]	copresence	[0.5994233909361094]	[92.0, 92.0, 92.0]	[0.10917169074982108, 1.063305004350691, 0.06688674027306148]	0	[correl_spearman=0.03335844135274474, dist_kullbackleibler=7.554685765853719E-10, dist_bray=0.25566521544976784]	[correl_spearman, dist_kullbackleibler, dist_bray]
12931	12787	Undirected	310	OTU-OTU28->OTU-OTU110		0.49	13550	OTU-OTU28->OTU-OTU110		OTU-OTU28->OTU-OTU110	FALSE		0.000678	0.002648	[6.5631765391366]	3	[6.696968206262723]	[dist_kullbackleibler=mutualExclusion, correl_spearman=mutualExclusion, dist_bray=mutualExclusion]	[dist_kullbackleibler=10.258405907224175	correl_spearman	-0.488238	[10.21513615669057, -0.4779664990080217, 0.8724204033180549]	[1.343004324754407]	[10.258405907224175, -0.4882379315061602, 0.8776554421824456]	[10.202977277510145, -0.48261542167892457, 0.874909733893399]	mutualExclusion	[10.258405907224175]	[98.0, 98.0, 98.0]	[1.2512257472667712, 0.12990323293294906, 0.033899173146714624]	0.000678	[dist_kullbackleibler=8.298570651094073E-4, correl_spearman=0.0955826043107465, dist_bray=0.1618365418891019]	[dist_kullbackleibler, correl_spearman, dist_bray]
12931	12908	Undirected	312	OTU-OTU28->OTU-OTU11		0.5	13504	OTU-OTU28->OTU-OTU11		OTU-OTU28->OTU-OTU11	FALSE		0	0	[-0.0012750254342392998]	3	[-0.002268066982587416]	[correl_spearman=copresence, dist_bray=copresence, dist_kullbackleibler=copresence]	[correl_spearman=0.5048361574408359	[correl_spearman	0.504836	[0.5129687016297954, 0.5799808637568079, 4.3330370277457515]	[0.15597567930234865]	[0.5048361574408359, 0.5885940305233774, 4.6260118511709]	[0.519429596365671, 0.5995628484720883, 4.295690897773701]	copresence	[0.5048361574408359]	[32.0, 32.0, 32.0]	[0.12948039798042896, 0.09707459352071293, 1.3178403513934616]	0	[correl_spearman=0.07608992718380458, dist_bray=0.22182098436012665, dist_kullbackleibler=1.2133758442445242E-9]	[correl_spearman, dist_bray, dist_kullbackleibler]
12931	12777	Undirected	313	OTU-OTU28->OTU-OTU13		0.55	13503	OTU-OTU28->OTU-OTU13		OTU-OTU28->OTU-OTU13	FALSE		0.00068	0.002652	[-0.03566602959809488]	3	[-0.014638401374301186]	[correl_spearman=mutualExclusion, dist_bray=mutualExclusion, dist_kullbackleibler=mutualExclusion]	[correl_spearman=-0.5498768383690998	[correl_spearman	-0.549877	[-0.5355053860281456, 0.8552085062202258, 11.445383783065108]	[0.1440446089697602]	[-0.5498768383690998, 0.8639433812350582, 11.63725208239225]	[-0.5455711369074538, 0.8504390250131596, 11.429498977943675]	mutualExclusion	[-0.5498768383690998]	[98.0, 98.0, 98.0]	[0.11841779713013693, 0.03878621243292721, 1.7288912967836187]	0.00068	[correl_spearman=0.06506046658268316, dist_bray=0.20601660196722493, dist_kullbackleibler=9.605313416518602E-4]	[correl_spearman, dist_bray, dist_kullbackleibler]
12931	12775	Undirected	314	OTU-OTU28->OTU-OTU14		0.51	13502	OTU-OTU28->OTU-OTU14		OTU-OTU28->OTU-OTU14	FALSE		0	0	[0.8046776952083763]	3	[0.7960772111282352]	[dist_bray=copresence, dist_kullbackleibler=copresence, correl_spearman=copresence]	[dist_bray=0.5521268439914228	correl_spearman	0.505169	[0.5309962880127297, 4.04581679482752, 0.5212551093865653]	[0.06860204157417804]	[0.5521268439914228, 4.540990749115475, 0.505168772771507]	[0.5312751481043361, 4.086083873810868, 0.5057006199091496]	copresence	[0.5521268439914228]	[28.0, 28.0, 28.0]	[0.08815184816919047, 1.2299284626971347, 0.12416142529773615]	0	[dist_bray=0.1859774185527372, dist_kullbackleibler=3.7192144919373504E-8, correl_spearman=0.06646865109637384]	[dist_bray, dist_kullbackleibler, correl_spearman]
12931	12955	Undirected	315	OTU-OTU28->OTU-OTU15		0.46	13501	OTU-OTU28->OTU-OTU15		OTU-OTU28->OTU-OTU15	FALSE		1e-06	7e-06	[-0.04112027269924405]	3	[-0.02010332423719025]	[correl_spearman=copresence, dist_kullbackleibler=copresence, dist_bray=copresence]	[correl_spearman=0.46004427360464306	[correl_spearman	0.460044	[0.4620073088033012, 4.427431946021921, 0.5862465095572625]	[0.15926663490366935]	[0.46004427360464306, 4.637193468909754, 0.6053215505209073]	[0.4791437486379695, 4.304255575352245, 0.5823265777502153]	copresence	[0.46004427360464306]	[84.0, 84.0, 84.0]	[0.14050095832642492, 1.1700821510584503, 0.07857344382731375]	1e-06	[correl_spearman=0.09918737872869676, dist_kullbackleibler=3.711418621321627E-7, dist_bray=0.31327374517203566]	[correl_spearman, dist_kullbackleibler, dist_bray]
12931	12969	Undirected	317	OTU-OTU28->OTU-OTU24		0.46	13495	OTU-OTU28->OTU-OTU24		OTU-OTU28->OTU-OTU24	FALSE		2e-06	1.4e-05	[0.7627390662058815]	3	[0.7480207038009752]	[dist_bray=copresence, dist_kullbackleibler=copresence, correl_spearman=copresence]	[dist_bray=0.4651402578088517	correl_spearman	0.46022	[0.46397540968595324, 3.109948919102149, 0.4512938338286037]	[0.06612058917737225]	[0.4651402578088517, 2.9584079623336943, 0.46021954221285527]	[0.4583864126802537, 3.0447327568762814, 0.4526035306175097]	copresence	[0.4651402578088517]	[98.0, 98.0, 98.0]	[0.06963189821544262, 1.0389515930291637, 0.13473813106002164]	2e-06	[dist_bray=0.14086877638062556, dist_kullbackleibler=1.5871773016984392E-6, correl_spearman=0.11644633640202234]	[dist_bray, dist_kullbackleibler, correl_spearman]
12931	12895	Undirected	318	OTU-OTU28->OTU-OTU25		0.54	13494	OTU-OTU28->OTU-OTU25		OTU-OTU28->OTU-OTU25	FALSE		2e-06	1.4e-05	[-0.013415700080594395]	3	[-0.019882846267202835]	[correl_spearman=copresence, dist_bray=copresence, dist_kullbackleibler=copresence]	[correl_spearman=0.5396014037693428	[correl_spearman	0.539601	[0.5324036502379006, 0.3685168336756272, 3.424791164412615]	[0.14656591152721016]	[0.5396014037693428, 0.3711859927974591, 3.4398863706472844]	[0.5356341558291761, 0.37217149662338145, 3.3997146727788436]	copresence	[0.5396014037693428]	[90.0, 90.0, 90.0]	[0.12700319655319328, 0.0705623295720241, 1.4959688040903099]	2e-06	[correl_spearman=0.06060271370953513, dist_bray=0.07607379617385002, dist_kullbackleibler=5.534789588423905E-6]	[correl_spearman, dist_bray, dist_kullbackleibler]
12931	12847	Undirected	319	OTU-OTU28->OTU-OTU27		0.43	13493	OTU-OTU28->OTU-OTU27		OTU-OTU28->OTU-OTU27	FALSE		0.000632	0.002489	[-0.02670466540004221]	3	[-0.021659981704313554]	[correl_spearman=copresence, dist_bray=copresence, dist_kullbackleibler=copresence]	[correl_spearman=0.4281542467102947	[correl_spearman	0.428154	[0.42255620253865794, 0.6013761453230498, 5.135268039104614]	[0.14063824558617086]	[0.4281542467102947, 0.6099081092727769, 5.177483860638633]	[0.4150981695048586, 0.6055947025518517, 5.200055983559941]	copresence	[0.4281542467102947]	[90.0, 90.0, 90.0]	[0.14557571642338907, 0.09600791030750751, 1.2316697813113553]	0.000632	[correl_spearman=0.12215936745726902, dist_bray=0.37278206172965245, dist_kullbackleibler=2.6084857981967247E-4]	[correl_spearman, dist_bray, dist_kullbackleibler]
12931	12789	Undirected	320	OTU-OTU28->OTU-OTU31		0.52	13485	OTU-OTU28->OTU-OTU31		OTU-OTU28->OTU-OTU31	FALSE		6.9e-05	0.00035	[6.686586225260038]	3	[6.6800385292152455]	[dist_kullbackleibler=copresence, dist_bray=copresence, correl_spearman=copresence]	[dist_kullbackleibler=3.1895519755939468	correl_spearman	0.524428	[3.1643238365618696, 0.42248664038673345, 0.5167866613766477]	[1.188782499117718]	[3.1895519755939468, 0.4117855968673041, 0.5244276906070394]	[3.1170699338627164, 0.4198505165629651, 0.5297408276181158]	copresence	[3.1895519755939468]	[98.0, 98.0, 98.0]	[0.8591722162462165, 0.07643360491740765, 0.12584144913461423]	6.9e-05	[dist_kullbackleibler=7.444351442287278E-5, dist_bray=0.2046759139642098, correl_spearman=0.06886998976247061]	[dist_kullbackleibler, dist_bray, correl_spearman]
12931	12914	Undirected	321	OTU-OTU28->OTU-OTU34		0.53	13484	OTU-OTU28->OTU-OTU34		OTU-OTU28->OTU-OTU34	FALSE		1e-06	5e-06	[0.6712297849059012]	3	[0.670277958054144]	[dist_bray=copresence, dist_kullbackleibler=copresence, correl_spearman=copresence]	[dist_bray=0.4120810212522896	correl_spearman	0.530793	[0.4161529406546645, 2.679649844238507, 0.5207176862199833]	[0.055764686151872495]	[0.4120810212522896, 2.5876659710291845, 0.5307929438107121]	[0.4119108503655521, 2.5691271996807137, 0.5249985996856378]	copresence	[0.4120810212522896]	[98.0, 98.0, 98.0]	[0.07731658521077213, 0.6915287653790859, 0.11814580525148217]	1e-06	[dist_bray=0.18037783414392994, dist_kullbackleibler=7.820498610922044E-7, correl_spearman=0.06181826293001291]	[dist_bray, dist_kullbackleibler, correl_spearman]
12931	12943	Undirected	322	OTU-OTU28->OTU-OTU35		0.55	13483	OTU-OTU28->OTU-OTU35		OTU-OTU28->OTU-OTU35	FALSE		0.000778	0.003001	[5.471840161256001]	3	[5.429554780082798]	[dist_kullbackleibler=copresence, correl_spearman=copresence, dist_bray=copresence]	[dist_kullbackleibler=3.0703695958352752	correl_spearman	0.54897	[3.0586639331966543, 0.5352039959687305, 0.4419645430293292]	[0.735178542519388]	[3.0703695958352752, 0.5489698008275232, 0.4408599402909902]	[3.072037333853283, 0.5534378000750779, 0.4456342092456228]	copresence	[3.0703695958352752]	[98.0, 98.0, 98.0]	[0.6137780841834662, 0.11098300311268779, 0.051442014750362676]	0.000778	[dist_kullbackleibler=0.0012380069223647538, correl_spearman=0.05623013604793048, dist_bray=0.21524745690946623]	[dist_kullbackleibler, correl_spearman, dist_bray]
12931	12767	Undirected	323	OTU-OTU28->OTU-OTU43		0.59	13473	OTU-OTU28->OTU-OTU43		OTU-OTU28->OTU-OTU43	FALSE		0	0	[8.37580552004069]	3	[8.301541273775024]	[dist_kullbackleibler=copresence, correl_spearman=copresence, dist_bray=copresence]	[dist_kullbackleibler=2.8328942777784802	correl_spearman	0.586815	[2.913685981949347, 0.5775157728780593, 0.48566914589975546]	[1.404044930528958]	[2.8328942777784802, 0.5868150608877754, 0.47682941993347605]	[2.827805849921012, 0.5815786030317516, 0.48403477993393]	copresence	[2.8328942777784802]	[96.0, 96.0, 96.0]	[0.753807592640166, 0.10797879067124443, 0.0579223421910155]	0	[dist_kullbackleibler=2.723963277162511E-10, correl_spearman=0.04061286151629795, dist_bray=0.19756680653859737]	[dist_kullbackleibler, correl_spearman, dist_bray]
12931	12922	Undirected	324	OTU-OTU28->OTU-OTU44		0.65	13472	OTU-OTU28->OTU-OTU44		OTU-OTU28->OTU-OTU44	FALSE		0	0	[0.735816970616403]	3	[0.7312320207948295]	[dist_bray=copresence, dist_kullbackleibler=copresence, correl_spearman=copresence]	[dist_bray=0.41598354867147225	correl_spearman	0.647706	[0.42059446684546403, 2.827398835899244, 0.6308218494782647]	[0.07253938702752281]	[0.41598354867147225, 2.6832479581660174, 0.6477057521760323]	[0.4174274876955191, 2.7175710413751655, 0.64890094567129]	copresence	[0.41598354867147225]	[90.0, 90.0, 90.0]	[0.06909541854765347, 1.2100184406247838, 0.12817459105593756]	0	[dist_bray=0.11865044697067839, dist_kullbackleibler=5.847219708421392E-9, correl_spearman=0.03799834766323823]	[dist_bray, dist_kullbackleibler, correl_spearman]
12931	12810	Undirected	325	OTU-OTU28->OTU-OTU45		0.36	13471	OTU-OTU28->OTU-OTU45		OTU-OTU28->OTU-OTU45	FALSE		0.002317	0.008049	[8.469031133063131]	3	[8.603760276034377]	[dist_kullbackleibler=copresence, correl_spearman=copresence, dist_bray=copresence]	[dist_kullbackleibler=5.206193253219714	correl_spearman	0.362099	[5.128142655232102, 0.3582306087787624, 0.6510530685162753]	[1.7475805379608407]	[5.206193253219714, 0.36209937217073856, 0.6635569064262636]	[5.006450291983325, 0.3606779067858079, 0.6458326961416827]	copresence	[5.206193253219714]	[98.0, 98.0, 98.0]	[1.1994285303912173, 0.12856235373992508, 0.05548214296418838]	0.002317	[dist_kullbackleibler=7.529450889741662E-4, correl_spearman=0.1658393437356827, dist_bray=0.4124787177150231]	[dist_kullbackleibler, correl_spearman, dist_bray]
12931	12920	Undirected	326	OTU-OTU28->OTU-OTU46		0.62	13470	OTU-OTU28->OTU-OTU46		OTU-OTU28->OTU-OTU46	FALSE		4e-06	2.3e-05	[0.7178887765368096]	3	[0.6993553034097202]	[dist_bray=copresence, correl_spearman=copresence, dist_kullbackleibler=copresence]	[dist_bray=0.4348840829189865	correl_spearman	0.624391	[0.4410245885111589, 0.6298883364781246, 3.1643058653660727]	[0.07063434305844583]	[0.4348840829189865, 0.6243908115292066, 3.324859885717955]	[0.4354339903361423, 0.6291860764984857, 3.059244964437038]	copresence	[0.4348840829189865]	[98.0, 98.0, 98.0]	[0.0790267527414646, 0.12150039946085336, 1.23503056034642]	4e-06	[dist_bray=0.1790624702256347, correl_spearman=0.03200829475888972, dist_kullbackleibler=7.776555199345836E-6]	[dist_bray, correl_spearman, dist_kullbackleibler]
12931	12793	Undirected	327	OTU-OTU28->OTU-OTU52		0.43	13465	OTU-OTU28->OTU-OTU52		OTU-OTU28->OTU-OTU52	FALSE		1.5e-05	8.3e-05	[7.020686671469134]	3	[7.237047255756583]	[dist_kullbackleibler=copresence, correl_spearman=copresence, dist_bray=copresence]	[dist_kullbackleibler=3.3101861600985965	correl_spearman	0.432927	[3.3577280443503006, 0.426486642678154, 0.5468809868819564]	[1.3200138423513799]	[3.3101861600985965, 0.4329268185155989, 0.5493283422497719]	[3.2121725187428734, 0.4371038735124375, 0.5435783185878467]	copresence	[3.3101861600985965]	[98.0, 98.0, 98.0]	[0.7725120565657324, 0.14262713106383873, 0.06976960124469186]	1.5e-05	[dist_kullbackleibler=5.080920098876618E-6, correl_spearman=0.12134929015188001, dist_bray=0.322452590867791]	[dist_kullbackleibler, correl_spearman, dist_bray]
12931	12886	Undirected	328	OTU-OTU28->OTU-OTU54		0.58	13464	OTU-OTU28->OTU-OTU54		OTU-OTU28->OTU-OTU54	FALSE		0.000252	0.001109	[0.6754495154795297]	3	[0.6720444040953393]	[dist_bray=mutualExclusion, correl_spearman=mutualExclusion, dist_kullbackleibler=mutualExclusion]	[dist_bray=0.7892924531203751	correl_spearman	-0.57668	[0.7852088707663253, -0.5624825706841251, 9.028965258868553]	[0.05236369449323024]	[0.7892924531203751, -0.5766804183317775, 9.242364240884466]	[0.7844213087013365, -0.5617564384292554, 9.000562837719274]	mutualExclusion	[0.7892924531203751]	[98.0, 98.0, 98.0]	[0.049742367169537755, 0.10980959526917043, 0.946795520693488]	0.000252	[dist_bray=0.3059385707231901, correl_spearman=0.055485602842855086, dist_kullbackleibler=2.5241054054037093E-4]	[dist_bray, correl_spearman, dist_kullbackleibler]
12931	12903	Undirected	329	OTU-OTU28->OTU-OTU56		0.43	13460	OTU-OTU28->OTU-OTU56		OTU-OTU28->OTU-OTU56	FALSE		0.000112	0.000539	[0.014115070670187312]	3	[0.007984156813804915]	[correl_spearman=copresence, dist_kullbackleibler=copresence, dist_bray=copresence]	[correl_spearman=0.4254267672978217	[correl_spearman	0.425427	[0.41724778244303723, 4.9672545177371985, 0.4976728997066958]	[0.158243180162392]	[0.4254267672978217, 5.019308523371251, 0.4902390417729995]	[0.4507283572620244, 4.601414051010857, 0.4833174825573744]	copresence	[0.4254267672978217]	[66.0, 66.0, 66.0]	[0.1698814147022667, 1.892893274368907, 0.10166836798938861]	0.000112	[correl_spearman=0.16036558259121253, dist_kullbackleibler=5.651871405354392E-5, dist_bray=0.19596070584846514]	[correl_spearman, dist_kullbackleibler, dist_bray]
12931	12773	Undirected	331	OTU-OTU28->OTU-OTU65		0.57	13454	OTU-OTU28->OTU-OTU65		OTU-OTU28->OTU-OTU65	FALSE		0	0	[10.252048045987925]	3	[10.146166705928813]	[dist_kullbackleibler=copresence, dist_bray=copresence, correl_spearman=copresence]	[dist_kullbackleibler=4.0200637983315515	correl_spearman	0.5706	[4.143113733005558, 0.559746833377046, 0.5457436818147174]	[1.9010564020664784]	[4.0200637983315515, 0.5631704957334428, 0.5705999034652922]	[4.0224511908122, 0.5646787970883962, 0.5435589943492483]	copresence	[4.0200637983315515]	[44.0, 44.0, 44.0]	[1.2600257157919887, 0.08215941087757624, 0.12340692714516346]	0	[dist_kullbackleibler=4.449274149109783E-8, dist_bray=0.22102726203390233, correl_spearman=0.05284978184909528]	[dist_kullbackleibler, dist_bray, correl_spearman]
12931	12822	Undirected	332	OTU-OTU28->OTU-OTU87		0.33	13426	OTU-OTU28->OTU-OTU87		OTU-OTU28->OTU-OTU87	FALSE		0.013096	0.037917	[6.707264800466602]	3	[7.071104799526284]	[dist_kullbackleibler=copresence, correl_spearman=copresence, dist_bray=copresence]	[dist_kullbackleibler=4.512101358193196	correl_spearman	0.33315	[4.499793308804357, 0.338244972933612, 0.5895287332100678]	[1.569050316833235]	[4.512101358193196, 0.33314999558263486, 0.5953682630269022]	[4.487545139436741, 0.3525448475064739, 0.5825957346888665]	copresence	[4.512101358193196]	[98.0, 98.0, 98.0]	[1.0319117592510303, 0.15327927035873246, 0.09456558918488137]	0.013096	[dist_kullbackleibler=0.005682994372948835, correl_spearman=0.18958385392287364, dist_bray=0.365827895128927]	[dist_kullbackleibler, correl_spearman, dist_bray]
12931	13000	Undirected	333	OTU-OTU28->OTU-OTU88		0.41	13425	OTU-OTU28->OTU-OTU88		OTU-OTU28->OTU-OTU88	FALSE		0.002056	0.007207	[0.03457038362713808]	3	[0.03319732113587181]	[correl_spearman=copresence, dist_kullbackleibler=copresence, dist_bray=copresence]	[correl_spearman=0.40773895288592277	[correl_spearman	0.407739	[0.41688459831007735, 4.769895364467383, 0.590511974853865]	[0.15755461832535483]	[0.40773895288592277, 4.978212410510992, 0.6043691040261633]	[0.437471200158753, 4.563512620463064, 0.5958038914387076]	copresence	[0.40773895288592277]	[98.0, 98.0, 98.0]	[0.1433796174381657, 1.273429503155004, 0.0730268872528298]	0.002056	[correl_spearman=0.15546086852813462, dist_kullbackleibler=8.705089620097972E-4, dist_bray=0.3319770674817968]	[correl_spearman, dist_kullbackleibler, dist_bray]
12922	12862	Undirected	334	OTU-OTU44->OTU-OTU112		0.45	13946	OTU-OTU44->OTU-OTU112		OTU-OTU44->OTU-OTU112	FALSE		1.3e-05	7.7e-05	[0.017352391770926397]	3	[0.00912408928427989]	[correl_spearman=copresence, dist_kullbackleibler=copresence, dist_bray=copresence]	[correl_spearman=0.4525531593323369	[correl_spearman	0.452553	[0.4182179692198874, 3.9503777161685782, 0.5040709432880198]	[0.1509330683215218]	[0.4525531593323369, 3.7185459788433546, 0.500937226267669]	[0.4341320156452999, 3.9931572297110125, 0.5092716202776048]	copresence	[0.4525531593323369]	[90.0, 90.0, 90.0]	[0.1328667520223824, 1.292211692286965, 0.08080221072386075]	1.3e-05	[correl_spearman=0.13086423469050668, dist_kullbackleibler=6.699114924457739E-6, dist_bray=0.2074260039240048]	[correl_spearman, dist_kullbackleibler, dist_bray]
12922	12908	Undirected	335	OTU-OTU44->OTU-OTU11		0.48	13475	OTU-OTU44->OTU-OTU11		OTU-OTU44->OTU-OTU11	FALSE		0	0	[-0.026398963020082516]	3	[-0.04313888010585936]	[correl_spearman=copresence, dist_bray=copresence, dist_kullbackleibler=copresence]	[correl_spearman=0.4829894783533407	[correl_spearman	0.482989	[0.4928872839046446, 0.5476815326057357, 3.842024906208978]	[0.14670696348212817]	[0.4829894783533407, 0.5263916689200444, 4.046101206778677]	[0.5078256725219259, 0.5538469801822425, 3.7303795087895724]	copresence	[0.4829894783533407]	[28.0, 28.0, 28.0]	[0.12638061766537703, 0.09711344602766551, 1.139393861926588]	0	[correl_spearman=0.06580196654718229, dist_bray=0.18683878030587997, dist_kullbackleibler=2.559163991833202E-10]	[correl_spearman, dist_bray, dist_kullbackleibler]
12922	12767	Undirected	336	OTU-OTU44->OTU-OTU43		0.36	13441	OTU-OTU44->OTU-OTU43		OTU-OTU44->OTU-OTU43	FALSE		0.008226	0.025144	[0.6758078745089013]	3	[0.6720674828302634]	[dist_bray=copresence, correl_spearman=copresence, dist_kullbackleibler=copresence]	[dist_bray=0.5184973869091449	correl_spearman	0.355607	[0.536045638110265, 0.3287189002312617, 4.9495288948160105]	[0.05738261411139457]	[0.5184973869091449, 0.3556068564426504, 4.787159099246907]	[0.535223815089868, 0.35390492407991136, 4.830947267030902]	copresence	[0.5184973869091449]	[88.0, 88.0, 88.0]	[0.07871265845239629, 0.14469623290832753, 1.3407401873315665]	0.008226	[dist_bray=0.31389970354548535, correl_spearman=0.19774839281870193, dist_kullbackleibler=0.003635449561608217]	[dist_bray, correl_spearman, dist_kullbackleibler]
12922	12773	Undirected	337	OTU-OTU44->OTU-OTU65		0.42	13413	OTU-OTU44->OTU-OTU65		OTU-OTU44->OTU-OTU65	FALSE		0.00127	0.004675	[0.7983864910424026]	3	[0.7875214274681478]	[dist_bray=copresence, dist_kullbackleibler=copresence, correl_spearman=copresence]	[dist_bray=0.5819456154959106	correl_spearman	0.421167	[0.6182833526493083, 5.909764904438746, 0.37066700106947587]	[0.07946566597970127]	[0.5819456154959106, 5.6554142352599905, 0.4211668094649192]	[0.6039851362350627, 5.908858989753214, 0.37728404877073607]	copresence	[0.5819456154959106]	[40.0, 40.0, 40.0]	[0.10575594552750735, 1.5977804470831216, 0.14711375448138644]	0.00127	[dist_bray=0.30138890127323514, dist_kullbackleibler=5.057798497503097E-4, correl_spearman=0.1704546852639987]	[dist_bray, dist_kullbackleibler, correl_spearman]
12922	12798	Undirected	338	OTU-OTU44->OTU-OTU98		0.43	13367	OTU-OTU44->OTU-OTU98		OTU-OTU44->OTU-OTU98	FALSE		1.2e-05	6.8e-05	[0.04024986760010567]	3	[0.01530073063850336]	[correl_spearman=mutualExclusion, dist_kullbackleibler=mutualExclusion, dist_bray=mutualExclusion]	[correl_spearman=-0.4332822372176546	[correl_spearman	-0.433282	[-0.42886159642063487, 18.740884121232103, 0.9691270845070807]	[0.1425440602868996]	[-0.4332822372176546, 19.447184378766593, 0.9808304556341964]	[-0.46459246776389185, 19.157483074051004, 0.9787896914427219]	mutualExclusion	[-0.4332822372176546]	[76.0, 76.0, 76.0]	[0.14551916564380604, 1.6996778324134354, 0.03834009476204227]	1.2e-05	[correl_spearman=0.12214214644977583, dist_kullbackleibler=3.87103558152635E-6, dist_bray=0.33391748951186506]	[correl_spearman, dist_kullbackleibler, dist_bray]
12920	12908	Undirected	339	OTU-OTU46->OTU-OTU11		0.48	13938	OTU-OTU46->OTU-OTU11		OTU-OTU46->OTU-OTU11	FALSE		0	1e-06	[0.8309238018700565]	3	[0.8174548074733538]	[dist_bray=copresence, dist_kullbackleibler=copresence, correl_spearman=copresence]	[dist_bray=0.5692589566088251	correl_spearman	0.484462	[0.575631549616708, 4.554087575370066, 0.4676275410829952]	[0.06569636352283599]	[0.5692589566088251, 4.724176275186085, 0.4844616376971634]	[0.5793344003368822, 4.558237763628535, 0.4820387763593311]	copresence	[0.5692589566088251]	[32.0, 32.0, 32.0]	[0.09917483379395846, 1.246862646469685, 0.13790405410771456]	0	[dist_bray=0.22127715448694452, dist_kullbackleibler=7.893037612394238E-8, correl_spearman=0.10580178324145367]	[dist_bray, dist_kullbackleibler, correl_spearman]
12920	12775	Undirected	340	OTU-OTU46->OTU-OTU14		0.54	13935	OTU-OTU46->OTU-OTU14		OTU-OTU46->OTU-OTU14	FALSE		0	1e-06	[0.013372248874462919]	3	[0.006919318968012282]	[correl_spearman=copresence, dist_kullbackleibler=copresence, dist_bray=copresence]	[correl_spearman=0.5365660406685039	[correl_spearman	0.536566	[0.5374513104429572, 4.103275179349566, 0.56578506966238]	[0.1633897001002445]	[0.5365660406685039, 4.438208722064103, 0.5738032932402959]	[0.5437120429151061, 4.137098420767326, 0.5645371145790212]	copresence	[0.5365660406685039]	[28.0, 28.0, 28.0]	[0.11602525121381951, 1.0300083093413377, 0.07735775215217727]	0	[correl_spearman=0.05967282053714573, dist_kullbackleibler=4.8638519767330024E-8, dist_bray=0.2300869165772581]	[correl_spearman, dist_kullbackleibler, dist_bray]
12920	12955	Undirected	341	OTU-OTU46->OTU-OTU15		0.46	13934	OTU-OTU46->OTU-OTU15		OTU-OTU46->OTU-OTU15	FALSE		0.000107	0.000522	[-8.497680036956355E-4]	3	[8.45519163677153E-4]	[correl_spearman=copresence, dist_bray=copresence, dist_kullbackleibler=copresence]	[correl_spearman=0.45887472199564316	[correl_spearman	0.458875	[0.457114906771518, 0.5729967937178604, 4.4171743593235115]	[0.13531204767987653]	[0.45887472199564316, 0.5866962632909569, 4.7957621756330315]	[0.47910535561019857, 0.5751559149734273, 4.40772270212673]	copresence	[0.45887472199564316]	[84.0, 84.0, 84.0]	[0.14279562365400622, 0.0747488253853921, 1.214907952934559]	0.000107	[correl_spearman=0.1136322662288119, dist_bray=0.2863401951438984, dist_kullbackleibler=5.197990078864567E-5]	[correl_spearman, dist_bray, dist_kullbackleibler]
12920	12969	Undirected	342	OTU-OTU46->OTU-OTU24		0.45	13918	OTU-OTU46->OTU-OTU24		OTU-OTU46->OTU-OTU24	FALSE		0.013041	0.037851	[0.02461353914349621]	3	[0.013478266434807411]	[correl_spearman=copresence, dist_bray=copresence, dist_kullbackleibler=copresence]	[correl_spearman=0.45366922148094385	[correl_spearman	0.453669	[0.45255487286032103, 0.516448934254856, 4.224516967859138]	[0.13564578733622545]	[0.45366922148094385, 0.5177495736171522, 4.37632029581836]	[0.4484172637842227, 0.5155701181675916, 4.15313645612367]	copresence	[0.45366922148094385]	[98.0, 98.0, 98.0]	[0.1520203068380161, 0.08553057680936473, 1.546361311460622]	0.013041	[correl_spearman=0.13005471736046653, dist_bray=0.23534448346481218, dist_kullbackleibler=0.01281174924934736]	[correl_spearman, dist_bray, dist_kullbackleibler]
12920	12895	Undirected	343	OTU-OTU46->OTU-OTU25		0.47	13917	OTU-OTU46->OTU-OTU25		OTU-OTU46->OTU-OTU25	FALSE		0.005071	0.016295	[0.736966025656844]	3	[0.7221881332352373]	[dist_bray=copresence, correl_spearman=copresence, dist_kullbackleibler=copresence]	[dist_bray=0.46237828834265804	correl_spearman	0.467786	[0.4635741273717199, 0.459193846521081, 4.8452745400436585]	[0.06186909380597664]	[0.46237828834265804, 0.46778596045090676, 5.021836281929854]	[0.45381954487888243, 0.45677931399476895, 4.654168025688878]	copresence	[0.46237828834265804]	[90.0, 90.0, 90.0]	[0.0915828384083377, 0.1538914176544689, 1.9575513447284318]	0.005071	[dist_bray=0.1963960652413228, correl_spearman=0.12628732798792447, dist_kullbackleibler=0.005142766735189541]	[dist_bray, correl_spearman, dist_kullbackleibler]
12920	12789	Undirected	344	OTU-OTU46->OTU-OTU31		0.6	13907	OTU-OTU46->OTU-OTU31		OTU-OTU46->OTU-OTU31	FALSE		0	0	[-0.04603000079780033]	3	[-0.003241908735985123]	[correl_spearman=copresence, dist_kullbackleibler=copresence, dist_bray=copresence]	[correl_spearman=0.5974835114497846	[correl_spearman	0.597484	[0.5862330917582654, 1.9695351579954532, 0.43698672584102]	[0.16770514948396226]	[0.5974835114497846, 1.9751025522460937, 0.4426611778127959]	[0.5837992351279294, 1.9252601776958147, 0.4389767169892511]	copresence	[0.5974835114497846]	[98.0, 98.0, 98.0]	[0.10716402545985633, 0.4276818647234237, 0.048167636827238784]	0	[correl_spearman=0.035875246563093155, dist_kullbackleibler=3.350410060498632E-9, dist_bray=0.1793858858490769]	[correl_spearman, dist_kullbackleibler, dist_bray]
12920	12914	Undirected	345	OTU-OTU46->OTU-OTU34		0.57	13906	OTU-OTU46->OTU-OTU34		OTU-OTU46->OTU-OTU34	FALSE		0	0	[5.832998316572766]	3	[5.835060172479142]	[dist_kullbackleibler=copresence, correl_spearman=copresence, dist_bray=copresence]	[dist_kullbackleibler=1.9762470319797705	correl_spearman	0.571049	[1.9694389870316482, 0.5657090468921505, 0.4558845302139613]	[1.1983473198922339]	[1.9762470319797705, 0.5710485500144029, 0.4656234369397393]	[1.9519721884482666, 0.5690468594760383, 0.4531935813650999]	copresence	[1.9762470319797705]	[98.0, 98.0, 98.0]	[0.38670799484433305, 0.09247001457724804, 0.05275028202589867]	0	[dist_kullbackleibler=2.546058919250527E-10, correl_spearman=0.034299433157194636, dist_bray=0.19648565161112974]	[dist_kullbackleibler, correl_spearman, dist_bray]
12920	12766	Undirected	346	OTU-OTU46->OTU-OTU42		0.32	13898	OTU-OTU46->OTU-OTU42		OTU-OTU46->OTU-OTU42	FALSE		0.008219	0.025143	[-0.01629974388665572]	3	[-7.228582071473408E-4]	[correl_spearman=copresence, dist_bray=copresence, dist_kullbackleibler=copresence]	[correl_spearman=0.31722068847735774	[correl_spearman	0.317221	[0.31207768929544366, 0.6465344711883926, 4.1675983689854235]	[0.16433603475037778]	[0.31722068847735774, 0.6557710919689334, 4.221184490869363]	[0.30371880931563744, 0.6481779942577941, 4.168283811437689]	copresence	[0.31722068847735774]	[98.0, 98.0, 98.0]	[0.1541460660040388, 0.05299419475500931, 0.8589134453282916]	0.008219	[correl_spearman=0.21280919739830845, dist_bray=0.46887896718112076, dist_kullbackleibler=0.002259203512637642]	[correl_spearman, dist_bray, dist_kullbackleibler]
12920	12767	Undirected	347	OTU-OTU46->OTU-OTU43		0.47	13897	OTU-OTU46->OTU-OTU43		OTU-OTU46->OTU-OTU43	FALSE		0.000352	0.001487	[7.604377332671499]	3	[7.388990545834366]	[dist_kullbackleibler=copresence, dist_bray=copresence, correl_spearman=copresence]	[dist_kullbackleibler=3.9335081593909784	correl_spearman	0.471175	[3.787157745855493, 0.5018027188925209, 0.47024528148945804]	[1.3889618101236967]	[3.9335081593909784, 0.5001980338363388, 0.47117487922321155]	[3.7801399562042954, 0.499331934298135, 0.4771598854932241]	copresence	[3.9335081593909784]	[96.0, 96.0, 96.0]	[1.0764071518469263, 0.055834908732164075, 0.1284179164105973]	0.000352	[dist_kullbackleibler=2.586403135836912E-4, dist_bray=0.2498893328039823, correl_spearman=0.09590013363340871]	[dist_kullbackleibler, dist_bray, correl_spearman]
12920	12922	Undirected	348	OTU-OTU46->OTU-OTU44		0.44	13896	OTU-OTU46->OTU-OTU44		OTU-OTU46->OTU-OTU44	FALSE		0.002875	0.009823	[-0.010748886587502185]	3	[-3.5876153934910225E-4]	[correl_spearman=copresence, dist_bray=copresence, dist_kullbackleibler=copresence]	[correl_spearman=0.4409835419470052	[correl_spearman	0.440984	[0.4137016736109824, 0.5634263641160996, 4.671966542137431]	[0.16363617234705186]	[0.4409835419470052, 0.5549302411797659, 4.624729129882482]	[0.42323087016262856, 0.5611072827098054, 4.594612309886138]	copresence	[0.4409835419470052]	[90.0, 90.0, 90.0]	[0.15051580455058317, 0.08148405886510227, 1.4734557569610656]	0.002875	[correl_spearman=0.14292586405220797, dist_bray=0.2972722916708398, dist_kullbackleibler=0.0015533729702710275]	[correl_spearman, dist_bray, dist_kullbackleibler]
12920	13104	Undirected	349	OTU-OTU46->OTU-OTU59		0.48	13887	OTU-OTU46->OTU-OTU59		OTU-OTU46->OTU-OTU59	FALSE		0	0	[9.934068462580548]	3	[10.026430160812694]	[dist_kullbackleibler=copresence, correl_spearman=copresence, dist_bray=copresence]	[dist_kullbackleibler=4.945208044139354	correl_spearman	0.48283	[4.719907423710521, 0.47752533867813973, 0.6374661301255317]	[1.8843932372750734]	[4.945208044139354, 0.48283046393712004, 0.6537919170633013]	[4.713416852354899, 0.4891836722708355, 0.6405018962687867]	copresence	[4.945208044139354]	[4.0, 4.0, 4.0]	[0.9006861719733915, 0.13223147831043552, 0.0729795407057373]	0	[dist_kullbackleibler=1.1260028909276798E-8, correl_spearman=0.08921739548301294, dist_bray=0.3180318383157763]	[dist_kullbackleibler, correl_spearman, dist_bray]
12920	12858	Undirected	350	OTU-OTU46->OTU-OTU64		0.51	13881	OTU-OTU46->OTU-OTU64		OTU-OTU46->OTU-OTU64	FALSE		0.000456	0.001872	[8.033143487470909]	3	[8.202195387466476]	[dist_kullbackleibler=copresence, dist_bray=copresence, correl_spearman=copresence]	[dist_kullbackleibler=4.199901156617412	correl_spearman	0.51394	[4.079333514078911, 0.46345165451245723, 0.5044596887246964]	[2.0481397790225353]	[4.199901156617412, 0.4720306330181546, 0.5139399159922062]	[4.093794806276223, 0.4602027686968647, 0.5158970411660463]	copresence	[4.199901156617412]	[98.0, 98.0, 98.0]	[1.6437472691536832, 0.0657077068349727, 0.1487907844258216]	0.000456	[dist_kullbackleibler=6.505376319121403E-4, dist_bray=0.13856722256868081, correl_spearman=0.09167620255052017]	[dist_kullbackleibler, dist_bray, correl_spearman]
12920	12773	Undirected	351	OTU-OTU46->OTU-OTU65		0.46	13880	OTU-OTU46->OTU-OTU65		OTU-OTU46->OTU-OTU65	FALSE		7.2e-05	0.000362	[0.045498150246934835]	3	[0.043603235209709094]	[correl_spearman=copresence, dist_kullbackleibler=copresence, dist_bray=copresence]	[correl_spearman=0.4561351798131692	[correl_spearman	0.456135	[0.4474764142679388, 5.034638716723503, 0.5211469988835647]	[0.14358693045953003]	[0.4561351798131692, 5.234903671559206, 0.5452993697140356]	[0.45557471991161314, 4.696610212689499, 0.5011659824175024]	copresence	[0.4561351798131692]	[44.0, 44.0, 44.0]	[0.13666569483019583, 1.4453919989946244, 0.08711608830963807]	7.2e-05	[correl_spearman=0.137310115276089, dist_kullbackleibler=4.2376932486765106E-5, dist_bray=0.18788362492870458]	[correl_spearman, dist_kullbackleibler, dist_bray]
12920	12822	Undirected	352	OTU-OTU46->OTU-OTU87		0.44	13872	OTU-OTU46->OTU-OTU87		OTU-OTU46->OTU-OTU87	FALSE		0	2e-06	[0.6805739908970733]	3	[0.6680200500189151]	[dist_bray=copresence, dist_kullbackleibler=copresence, correl_spearman=copresence]	[dist_bray=0.5899213152943517	correl_spearman	0.438435	[0.5744164870588927, 2.742479799878385, 0.4363023404796957]	[0.06348938780662595]	[0.5899213152943517, 2.800139348693763, 0.4384354148153715]	[0.581296357089983, 2.734286397120925, 0.4488299574582914]	copresence	[0.5899213152943517]	[98.0, 98.0, 98.0]	[0.06539374797919247, 0.4771279630993629, 0.13257177431210615]	0	[dist_bray=0.3571689602233922, dist_kullbackleibler=5.732976227079689E-8, correl_spearman=0.11245545426527076]	[dist_bray, dist_kullbackleibler, correl_spearman]
12920	12781	Undirected	353	OTU-OTU46->OTU-OTU96		0.33	13866	OTU-OTU46->OTU-OTU96		OTU-OTU46->OTU-OTU96	FALSE		0.000822	0.003157	[8.010700365338371]	3	[8.006671528380359]	[dist_kullbackleibler=copresence, correl_spearman=copresence, dist_bray=copresence]	[dist_kullbackleibler=4.7303154843177655	correl_spearman	0.333379	[4.6604410163828485, 0.332833724382292, 0.6337984293567386]	[1.8804916537784775]	[4.7303154843177655, 0.33337893296853627, 0.6431441386831306]	[4.570601533655232, 0.3262110017890212, 0.63383436480031]	copresence	[4.7303154843177655]	[98.0, 98.0, 98.0]	[0.9131709588330004, 0.1315611275545721, 0.0611427266768698]	0.000822	[dist_kullbackleibler=2.3114381723110533E-4, correl_spearman=0.181412483703573, dist_bray=0.3796491601707709]	[dist_kullbackleibler, correl_spearman, dist_bray]
12920	12798	Undirected	354	OTU-OTU46->OTU-OTU98		0.33	13865	OTU-OTU46->OTU-OTU98		OTU-OTU46->OTU-OTU98	FALSE		0.000141	0.000659	[0.8842996199562898]	3	[0.8740968796153168]	[dist_bray=mutualExclusion, correl_spearman=mutualExclusion, dist_kullbackleibler=mutualExclusion]	[dist_bray=0.970771962308515	correl_spearman	-0.32801	[0.9583241951231112, -0.3122632765114467, 17.85521230721347]	[0.05928172426711296]	[0.970771962308515, -0.3280104494265153, 18.876143721232015]	[0.9753643804780147, -0.3222446244145203, 18.044819636790713]	mutualExclusion	[0.970771962308515]	[84.0, 84.0, 84.0]	[0.0407177887834446, 0.14697450228105866, 1.6956629039250153]	0.000141	[dist_bray=0.33818996771341503, correl_spearman=0.22071659732064952, dist_kullbackleibler=3.05285097897956E-5]	[dist_bray, correl_spearman, dist_kullbackleibler]
12920	12804	Undirected	355	OTU-OTU46->OTU-OTU100		0.45	13360	OTU-OTU46->OTU-OTU100		OTU-OTU46->OTU-OTU100	FALSE		0.001454	0.005285	[7.213461371677225]	3	[7.269983145425089]	[dist_kullbackleibler=copresence, dist_bray=copresence, correl_spearman=copresence]	[dist_kullbackleibler=4.041306302706749	correl_spearman	0.445999	[3.7784634461174647, 0.5835881894680776, 0.4495850995218015]	[1.3725574911331027]	[4.041306302706749, 0.5955266975548719, 0.4459987892464638]	[3.5274994958368446, 0.5880637489269205, 0.4637712897224665]	copresence	[4.041306302706749]	[98.0, 98.0, 98.0]	[1.2209137754196937, 0.06083390970775599, 0.1373473372411839]	0.001454	[dist_kullbackleibler=7.891428737053507E-4, dist_bray=0.3343221100809415, correl_spearman=0.11476155471800409]	[dist_kullbackleibler, dist_bray, correl_spearman]
12920	12862	Undirected	356	OTU-OTU46->OTU-OTU112		0.48	13349	OTU-OTU46->OTU-OTU112		OTU-OTU46->OTU-OTU112	FALSE		0.001488	0.005393	[-0.031249135123982995]	3	[-0.005719579977327488]	[correl_spearman=copresence, dist_kullbackleibler=copresence, dist_bray=copresence]	[correl_spearman=0.47947146258935736	[correl_spearman	0.479471	[0.48202379478523827, 4.442720119329472, 0.5254284013848725]	[0.149391955898784]	[0.47947146258935736, 4.558426537139584, 0.5265781394155151]	[0.5053040655991372, 4.416441804743808, 0.5205814611713999]	copresence	[0.47947146258935736]	[98.0, 98.0, 98.0]	[0.1509576980100898, 1.524428862930061, 0.07601041350067261]	0.001488	[correl_spearman=0.10467643238884028, dist_kullbackleibler=0.0012369268216347873, dist_bray=0.2401142706505055]	[correl_spearman, dist_kullbackleibler, dist_bray]
12917	12804	Undirected	357	OTU-OTU30->OTU-OTU100		0.43	13939	OTU-OTU30->OTU-OTU100		OTU-OTU30->OTU-OTU100	FALSE		0.000249	0.001098	[0.0037614403908703634]	3	[0.002674467705473071]	[correl_spearman=mutualExclusion, dist_kullbackleibler=mutualExclusion, dist_bray=mutualExclusion]	[correl_spearman=-0.43067656599823245	[correl_spearman	-0.430677	[-0.4086912637749741, 12.761820707381311, 0.85451664876906]	[0.1453140994635736]	[-0.43067656599823245, 13.488923826225093, 0.868601028802354]	[-0.3936211472473448, 13.322945519463431, 0.8652373529608867]	mutualExclusion	[-0.43067656599823245]	[100.0, 100.0, 100.0]	[0.14471061531611418, 2.003986979660272, 0.052186656778012604]	0.000249	[correl_spearman=0.1397642885470085, dist_kullbackleibler=9.499910750110363E-5, dist_bray=0.31885466035042054]	[correl_spearman, dist_kullbackleibler, dist_bray]
12917	12787	Undirected	358	OTU-OTU30->OTU-OTU110		0.26	13919	OTU-OTU30->OTU-OTU110		OTU-OTU30->OTU-OTU110	FALSE		0.004908	0.015828	[6.6645183244871244]	3	[6.700135915751384]	[dist_kullbackleibler=copresence, dist_bray=copresence, correl_spearman=copresence]	[dist_kullbackleibler=3.7120577392767453	correl_spearman	0.260237	[3.769716440271124, 0.5126714885554547, 0.24011122221254433]	[1.3504695319840296]	[3.7120577392767453, 0.529936113930357, 0.260236546746722]	[3.6268493880248025, 0.5107034557766179, 0.2378643208348758]	copresence	[3.7120577392767453]	[100.0, 100.0, 100.0]	[1.079281373203844, 0.07280865439007905, 0.16556627113317401]	0.004908	[dist_kullbackleibler=0.00239568031947357, dist_bray=0.18542616115569022, correl_spearman=0.2763289564682807]	[dist_kullbackleibler, dist_bray, correl_spearman]
12917	12822	Undirected	360	OTU-OTU30->OTU-OTU87		0.33	13771	OTU-OTU30->OTU-OTU87		OTU-OTU30->OTU-OTU87	FALSE		0.003084	0.010435	[6.472881294947554]	3	[7.129992379656625]	[dist_kullbackleibler=mutualExclusion, correl_spearman=mutualExclusion, dist_bray=mutualExclusion]	[dist_kullbackleibler=13.728935154019274	correl_spearman	-0.332646	[12.557331037748028, -0.31266329627776274, 0.8091817862291816]	[2.300617712798353]	[13.728935154019274, -0.3326458549319719, 0.8283104823322769]	[13.154745202375274, -0.3080582788314744, 0.8251554127896997]	mutualExclusion	[13.728935154019274]	[100.0, 100.0, 100.0]	[2.958688189596255, 0.1716857740678907, 0.07091686768162928]	0.003084	[dist_kullbackleibler=8.01732329269389E-4, correl_spearman=0.22480381835375796, dist_bray=0.3970274465082284]	[dist_kullbackleibler, correl_spearman, dist_bray]
12917	12796	Undirected	361	OTU-OTU30->OTU-OTU99		0.46	13756	OTU-OTU30->OTU-OTU99		OTU-OTU30->OTU-OTU99	FALSE		0.000129	0.000609	[8.284116504368038]	3	[8.540256209099912]	[dist_kullbackleibler=mutualExclusion, correl_spearman=mutualExclusion, dist_bray=mutualExclusion]	[dist_kullbackleibler=14.482667801074122	correl_spearman	-0.45717	[13.701090400139554, -0.4378736211781209, 0.8787107394573983]	[1.953082544469007]	[14.482667801074122, -0.45717021551942466, 0.8997317899833408]	[14.11565871628657, -0.44064867008043773, 0.8868215497760967]	mutualExclusion	[14.482667801074122]	[88.0, 88.0, 88.0]	[1.7645461410104337, 0.1339210291100085, 0.05251776727686225]	0.000129	[dist_kullbackleibler=5.1141638238272336E-5, correl_spearman=0.12840814507273712, dist_bray=0.3134748130144165]	[dist_kullbackleibler, correl_spearman, dist_bray]
12914	12896	Undirected	362	OTU-OTU34->OTU-OTU1		0.32	14095	OTU-OTU34->OTU-OTU1		OTU-OTU34->OTU-OTU1	FALSE		0.009241	0.027953	[6.244561494463442]	3	[6.223792598620828]	[dist_kullbackleibler=copresence, dist_bray=copresence, correl_spearman=copresence]	[dist_kullbackleibler=3.7641575126865714	correl_spearman	0.316843	[3.8156772930459324, 0.6195894123959947, 0.30611826459949637]	[1.1196085126797077]	[3.7641575126865714, 0.613067766893784, 0.3168428129337762]	[3.818328781072674, 0.6140084785814612, 0.3285624620285861]	copresence	[3.7641575126865714]	[96.0, 96.0, 96.0]	[0.7819724992611272, 0.06338359320070769, 0.1398761704518449]	0.009241	[dist_kullbackleibler=0.0032325225526220747, dist_bray=0.4127255357970586, correl_spearman=0.1942847726242417]	[dist_kullbackleibler, dist_bray, correl_spearman]
12914	12775	Undirected	363	OTU-OTU34->OTU-OTU14		0.33	13592	OTU-OTU34->OTU-OTU14		OTU-OTU34->OTU-OTU14	FALSE		0.001364	0.004989	[0.7618350523235622]	3	[0.751249245784378]	[dist_bray=copresence, correl_spearman=copresence, dist_kullbackleibler=copresence]	[dist_bray=0.6167931890622691	correl_spearman	0.327303	[0.5936594164886643, 0.3446502092222472, 4.463673728984898]	[0.056218635961626684]	[0.6167931890622691, 0.32730257746427666, 4.995024840783047]	[0.5844892792154219, 0.3476430297421157, 4.451035551279974]	copresence	[0.6167931890622691]	[28.0, 28.0, 28.0]	[0.06786986292331211, 0.13269613785553291, 0.9723300019134967]	0.001364	[dist_bray=0.272619892007292, correl_spearman=0.16220822682284036, dist_kullbackleibler=6.369470514921982E-4]	[dist_bray, correl_spearman, dist_kullbackleibler]
12914	12895	Undirected	364	OTU-OTU34->OTU-OTU25		0.67	13576	OTU-OTU34->OTU-OTU25		OTU-OTU34->OTU-OTU25	FALSE		0	0	[9.591042663244348E-4]	3	[0.003689811127445283]	[correl_spearman=copresence, dist_kullbackleibler=copresence, dist_bray=copresence]	[correl_spearman=0.6663034353051037	[correl_spearman	0.666303	[0.6671410616470137, 1.9180017157031115, 0.41780020487255215]	[0.16129472636697648]	[0.6663034353051037, 1.9799652925750373, 0.43205070196693196]	[0.6799097141762801, 1.8598182925045048, 0.4179598442181136]	copresence	[0.6663034353051037]	[92.0, 92.0, 92.0]	[0.08485377607200145, 0.5619920514742144, 0.06882508955034995]	0	[correl_spearman=0.011375839495523232, dist_kullbackleibler=1.9720634014674943E-9, dist_bray=0.16060553246556997]	[correl_spearman, dist_kullbackleibler, dist_bray]
12914	12767	Undirected	366	OTU-OTU34->OTU-OTU43		0.44	13552	OTU-OTU34->OTU-OTU43		OTU-OTU34->OTU-OTU43	FALSE		0.001566	0.00564	[0.5918544175053536]	3	[0.5860143826790295]	[dist_bray=copresence, correl_spearman=copresence, dist_kullbackleibler=copresence]	[dist_bray=0.43713660959900813	correl_spearman	0.44228	[0.43370941151422626, 0.45568364096317454, 2.7094098659696786]	[0.06414721568499399]	[0.43713660959900813, 0.4422795144201707, 2.9053911940881774]	[0.42974438604028187, 0.4622289913352344, 2.6737860646912552]	copresence	[0.43713660959900813]	[98.0, 98.0, 98.0]	[0.06339155121906465, 0.11823386701364312, 0.8323024037157812]	0.001566	[dist_bray=0.2726158705574603, correl_spearman=0.08580701929023932, dist_kullbackleibler=0.0014080619185068421]	[dist_bray, correl_spearman, dist_kullbackleibler]
12914	12922	Undirected	367	OTU-OTU34->OTU-OTU44		0.32	13551	OTU-OTU34->OTU-OTU44		OTU-OTU34->OTU-OTU44	FALSE		0.001515	0.005475	[6.290532342493687]	3	[6.343117504594967]	[dist_kullbackleibler=copresence, correl_spearman=copresence, dist_bray=copresence]	[dist_kullbackleibler=3.463732603195974	correl_spearman	0.316367	[3.6020469690542303, 0.28124508871133297, 0.547267969803537]	[1.1938293926385801]	[3.463732603195974, 0.3163673929918743, 0.5373470909293564]	[3.5909383410287403, 0.27125670296506826, 0.5460692702111973]	copresence	[3.463732603195974]	[90.0, 90.0, 90.0]	[0.6855018926165735, 0.1359893629070084, 0.06145551329647082]	0.001515	[dist_kullbackleibler=4.653646345356144E-4, correl_spearman=0.22568628405761237, dist_bray=0.30214352022565516]	[dist_kullbackleibler, correl_spearman, dist_bray]
12914	12884	Undirected	368	OTU-OTU34->OTU-OTU55		0.35	13543	OTU-OTU34->OTU-OTU55		OTU-OTU34->OTU-OTU55	FALSE		0.004922	0.015859	[0.808921636156909]	3	[0.8092648165343482]	[dist_bray=mutualExclusion, correl_spearman=mutualExclusion, dist_kullbackleibler=mutualExclusion]	[dist_bray=0.8745603428436294	correl_spearman	-0.347106	[0.8670140913825679, -0.3508117045950041, 15.156300851941046]	[0.04962456110732187]	[0.8745603428436294, -0.3471064580110648, 16.7558570623765]	[0.8701873164398928, -0.373261847497535, 16.54963619681194]	mutualExclusion	[0.8745603428436294]	[90.0, 90.0, 90.0]	[0.05529970044245058, 0.143542724606042, 4.244254131029825]	0.004922	[dist_bray=0.4030054045175778, correl_spearman=0.17274038148185988, dist_kullbackleibler=0.0017692686251339351]	[dist_bray, correl_spearman, dist_kullbackleibler]
12914	12858	Undirected	370	OTU-OTU34->OTU-OTU64		0.62	13531	OTU-OTU34->OTU-OTU64		OTU-OTU34->OTU-OTU64	FALSE		0	0	[6.402971897410842]	3	[6.485660551388617]	[dist_kullbackleibler=copresence, correl_spearman=copresence, dist_bray=copresence]	[dist_kullbackleibler=2.0891871812562623	correl_spearman	0.61901	[2.0662791406331866, 0.6131119053637247, 0.455550092812299]	[1.4594759691581225]	[2.0891871812562623, 0.6190096514293122, 0.4486482896162117]	[2.067433704540667, 0.6248107238000302, 0.458706200915317]	copresence	[2.0891871812562623]	[100.0, 100.0, 100.0]	[0.4128807043130599, 0.10232010602778865, 0.060493483494022865]	0	[dist_kullbackleibler=3.0393465522138285E-12, correl_spearman=0.030737205464547612, dist_bray=0.16093917404894764]	[dist_kullbackleibler, correl_spearman, dist_bray]
12914	12773	Undirected	371	OTU-OTU34->OTU-OTU65		0.43	13530	OTU-OTU34->OTU-OTU65		OTU-OTU34->OTU-OTU65	FALSE		5.1e-05	0.000265	[0.7484594208309769]	3	[0.7503710986300274]	[dist_bray=copresence, correl_spearman=copresence, dist_kullbackleibler=copresence]	[dist_bray=0.5827994757428809	correl_spearman	0.425904	[0.5729304471366647, 0.40809486088342367, 3.896435998695992]	[0.05817637383894908]	[0.5827994757428809, 0.42590387561438736, 4.032078746706013]	[0.5703161486549925, 0.4105224785162095, 3.770587792378864]	copresence	[0.5827994757428809]	[44.0, 44.0, 44.0]	[0.06863480210427902, 0.13377363963870803, 0.8095268539134809]	5.1e-05	[dist_bray=0.24910788724644894, correl_spearman=0.1344182360797308, dist_kullbackleibler=2.2817534262253858E-5]	[dist_bray, correl_spearman, dist_kullbackleibler]
12914	12822	Undirected	372	OTU-OTU34->OTU-OTU87		0.47	13510	OTU-OTU34->OTU-OTU87		OTU-OTU34->OTU-OTU87	FALSE		0.001802	0.006399	[0.6207795087461954]	3	[0.6202751148395302]	[dist_bray=copresence, dist_kullbackleibler=copresence, correl_spearman=copresence]	[dist_bray=0.4408541312918829	correl_spearman	0.46542	[0.43805875084184787, 2.1667479320113556, 0.47466124716108415]	[0.054690885075228055]	[0.4408541312918829, 2.3034832151687152, 0.46542024918585767]	[0.4330657316291665, 2.1121543583180187, 0.4813894939397553]	copresence	[0.4408541312918829]	[100.0, 100.0, 100.0]	[0.08421302176115626, 0.7577012767211758, 0.13674584934727188]	0.001802	[dist_bray=0.2650312835535389, dist_kullbackleibler=0.0017188970964491235, correl_spearman=0.08483559512417604]	[dist_bray, dist_kullbackleibler, correl_spearman]
12914	12798	Undirected	373	OTU-OTU34->OTU-OTU98		0.34	13497	OTU-OTU34->OTU-OTU98		OTU-OTU34->OTU-OTU98	FALSE		0.006806	0.021209	[-0.04503904381080697]	3	[-0.040033315515661416]	[correl_spearman=mutualExclusion, dist_bray=mutualExclusion, dist_kullbackleibler=mutualExclusion]	[correl_spearman=-0.34126806344299726	[correl_spearman	-0.341268	[-0.33915933014042815, 0.9152883896894451, 13.789964414070074]	[0.12327564639135259]	[-0.34126806344299726, 0.9225707591279138, 14.291548259596167]	[-0.33761779711137896, 0.9198441226543846, 13.878562582499944]	mutualExclusion	[-0.34126806344299726]	[86.0, 86.0, 86.0]	[0.12305409109745503, 0.03802163292582006, 1.7123218659544897]	0.006806	[correl_spearman=0.19690745809179888, dist_bray=0.38523002580855925, dist_kullbackleibler=0.002376518524312754]	[correl_spearman, dist_bray, dist_kullbackleibler]
12914	12862	Undirected	374	OTU-OTU34->OTU-OTU112		0.7	13438	OTU-OTU34->OTU-OTU112		OTU-OTU34->OTU-OTU112	FALSE		0	0	[-0.005819865418863684]	3	[-0.01578655218617978]	[correl_spearman=copresence, dist_bray=copresence, dist_kullbackleibler=copresence]	[correl_spearman=0.6983169552588276	[correl_spearman	0.698317	[0.6857432852584628, 0.35059527596965867, 1.391416608829263]	[0.14239023032486556]	[0.6983169552588276, 0.34299636735963757, 1.3397589510758876]	[0.6992596150604241, 0.3515868782925068, 1.305288335916593]	copresence	[0.6983169552588276]	[100.0, 100.0, 100.0]	[0.0877613736270012, 0.05511629309152189, 0.3834514396931787]	0	[correl_spearman=0.008940588703517993, dist_bray=0.07286025687368469, dist_kullbackleibler=3.1086244689504383E-15]	[correl_spearman, dist_bray, dist_kullbackleibler]
12908	12767	Undirected	375	OTU-OTU11->OTU-OTU43		0.62	12990	OTU-OTU11->OTU-OTU43		OTU-OTU11->OTU-OTU43	FALSE		0	0	[0.010182493550069907]	3	[0.010185434342430943]	[correl_spearman=copresence, dist_kullbackleibler=copresence, dist_bray=copresence]	[correl_spearman=0.621904064549035	[correl_spearman	0.621904	[0.5999966992487876, 3.950974397226321, 0.6438638972212225]	[0.1507600023418013]	[0.621904064549035, 4.012048854062654, 0.64642549697172]	[0.6068703087607983, 3.920032865129066, 0.6406588503343662]	copresence	[0.621904064549035]	[32.0, 32.0, 32.0]	[0.09658290433920103, 0.7528175309660419, 0.057898964411863096]	0	[correl_spearman=0.028857620426305797, dist_kullbackleibler=4.89475127096739E-12, dist_bray=0.24646880261569903]	[correl_spearman, dist_kullbackleibler, dist_bray]
12908	12862	Undirected	376	OTU-OTU11->OTU-OTU112		0.48	12984	OTU-OTU11->OTU-OTU112		OTU-OTU11->OTU-OTU112	FALSE		1e-06	4e-06	[0.8433013689857911]	3	[0.8257703090093067]	[dist_bray=copresence, correl_spearman=copresence, dist_kullbackleibler=copresence]	[dist_bray=0.6028164858801544	correl_spearman	0.484728	[0.5815135848836395, 0.49141710621851353, 4.4249231876098625]	[0.07045685950424715]	[0.6028164858801544, 0.4847281225630169, 4.922050099281945]	[0.5851173524348674, 0.5067055816745696, 4.222103605955923]	copresence	[0.6028164858801544]	[32.0, 32.0, 32.0]	[0.11375137092585187, 0.12413735682435344, 1.4420652255959843]	1e-06	[dist_bray=0.23446652096485754, correl_spearman=0.07441525264172671, dist_kullbackleibler=3.4883751831582543E-7]	[dist_bray, correl_spearman, dist_kullbackleibler]
12908	12886	Undirected	377	OTU-OTU11->OTU-OTU54		0.46	12983	OTU-OTU11->OTU-OTU54		OTU-OTU11->OTU-OTU54	FALSE		0.009326	0.028139	[-0.03382729909956203]	3	[-0.04411423081728084]	[correl_spearman=mutualExclusion, dist_bray=mutualExclusion, dist_kullbackleibler=mutualExclusion]	[correl_spearman=-0.4564897466226309	[correl_spearman	-0.45649	[-0.4496677683248066, 0.8388026336038159, 9.961900972502539]	[0.16074830476174998]	[-0.4564897466226309, 0.8572603171815947, 10.639836163440616]	[-0.45032551549891875, 0.8435995416025455, 10.032793194156405]	mutualExclusion	[-0.4564897466226309]	[32.0, 32.0, 32.0]	[0.1265338841050777, 0.03929933691720989, 1.0111355395668644]	0.009326	[correl_spearman=0.12712132113843588, dist_bray=0.3865564960268809, dist_kullbackleibler=0.005333205678308639]	[correl_spearman, dist_bray, dist_kullbackleibler]
12908	12773	Undirected	378	OTU-OTU11->OTU-OTU65		0.47	12973	OTU-OTU11->OTU-OTU65		OTU-OTU11->OTU-OTU65	FALSE		0	0	[12.253588443871703]	3	[12.03620905106897]	[dist_kullbackleibler=copresence, correl_spearman=copresence, dist_bray=copresence]	[dist_kullbackleibler=4.532816924083538	correl_spearman	0.470452	[4.7978201018214754, 0.4329661538638752, 0.6458330265499648]	[2.54570278139475]	[4.532816924083538, 0.47045199886316363, 0.6313323230069624]	[4.756330539848293, 0.4427435543993901, 0.6526918938369761]	copresence	[4.532816924083538]	[6.0, 6.0, 6.0]	[1.2521159918928308, 0.1181797711179162, 0.11243973253222056]	0	[dist_kullbackleibler=4.941203002317707E-11, correl_spearman=0.10546428907251215, dist_bray=0.27578618760970086]	[dist_kullbackleibler, correl_spearman, dist_bray]
12908	12822	Undirected	379	OTU-OTU11->OTU-OTU87		0.57	12926	OTU-OTU11->OTU-OTU87		OTU-OTU11->OTU-OTU87	FALSE		0	0	[9.05913611444608]	3	[8.969609077013196]	[dist_kullbackleibler=copresence, correl_spearman=copresence, dist_bray=copresence]	[dist_kullbackleibler=3.335623134664172	correl_spearman	0.574583	[3.0319068645136715, 0.5692650826953213, 0.46701491176215143]	[1.7256112281333342]	[3.335623134664172, 0.5745826007291968, 0.49263639945335214]	[2.8990204344665664, 0.565217308216754, 0.461103493850554]	copresence	[3.335623134664172]	[32.0, 32.0, 32.0]	[0.8995254186530163, 0.09896926830964362, 0.09306473537040763]	0	[dist_kullbackleibler=1.9182511135085178E-10, correl_spearman=0.033827667475099965, dist_bray=0.1349953027457158]	[dist_kullbackleibler, correl_spearman, dist_bray]
12908	12798	Undirected	380	OTU-OTU11->OTU-OTU98		0.27	12909	OTU-OTU11->OTU-OTU98		OTU-OTU11->OTU-OTU98	FALSE		0.000423	0.001746	[-0.0022256501535997215]	3	[0.0029544562716937316]	[correl_spearman=mutualExclusion, dist_kullbackleibler=mutualExclusion, dist_bray=mutualExclusion]	[correl_spearman=-0.26911505416576975	[correl_spearman	-0.269115	[-0.2967402416146018, 19.526695056452237, 0.98646019772908]	[0.14608268077998984]	[-0.26911505416576975, 20.285393540068156, 0.9929905853339134]	[-0.30022463622871953, 19.584781390444427, 0.9911665580602885]	mutualExclusion	[-0.26911505416576975]	[20.0, 20.0, 20.0]	[0.12105090444265836, 1.5823758935243482, 0.013426174487707592]	0.000423	[correl_spearman=0.1945142537973621, dist_kullbackleibler=1.7389074727081066E-4, dist_bray=0.2247051826159312]	[correl_spearman, dist_kullbackleibler, dist_bray]
12903	12787	Undirected	382	OTU-OTU56->OTU-OTU110		0.47	13882	OTU-OTU56->OTU-OTU110		OTU-OTU56->OTU-OTU110	FALSE		0.013888	0.040013	[7.47232468037045]	3	[7.50177121358528]	[dist_kullbackleibler=mutualExclusion, correl_spearman=mutualExclusion, dist_bray=mutualExclusion]	[dist_kullbackleibler=10.896137328418938	correl_spearman	-0.47156	[10.458710414717892, -0.4437547091803946, 0.8131005987193646]	[1.1922833117974847]	[10.896137328418938, -0.4715602293081798, 0.8325258056865699]	[10.650340214162783, -0.4292137026013547, 0.8153898505101065]	mutualExclusion	[10.896137328418938]	[66.0, 66.0, 66.0]	[1.549044587479602, 0.14826380300051292, 0.08228164723301988]	0.013888	[dist_kullbackleibler=0.00875540325701174, correl_spearman=0.11534874705629417, dist_bray=0.4190480375674156]	[dist_kullbackleibler, correl_spearman, dist_bray]
12903	12908	Undirected	383	OTU-OTU56->OTU-OTU11		0.52	13847	OTU-OTU56->OTU-OTU11		OTU-OTU56->OTU-OTU11	FALSE		0.000113	0.000541	[11.936425808117491]	3	[11.733370268815975]	[dist_kullbackleibler=copresence, dist_bray=copresence, correl_spearman=copresence]	[dist_kullbackleibler=5.56817687487209	correl_spearman	0.515623	[5.722411111168302, 0.5350586006912124, 0.48809407843962543]	[2.115677963482623]	[5.56817687487209, 0.5196900532509781, 0.5156227655730821]	[5.31175632775248, 0.5269209669650394, 0.49113711772809227]	copresence	[5.56817687487209]	[14.0, 14.0, 14.0]	[2.5156591886334905, 0.14440119677653654, 0.15942882601126457]	0.000113	[dist_kullbackleibler=7.538011991914395E-5, dist_bray=0.20471418389932272, correl_spearman=0.11578537918590359]	[dist_kullbackleibler, dist_bray, correl_spearman]
12903	12775	Undirected	384	OTU-OTU56->OTU-OTU14		0.52	13846	OTU-OTU56->OTU-OTU14		OTU-OTU56->OTU-OTU14	FALSE		0	0	[0.8386446382929754]	3	[0.8214538273834634]	[dist_bray=copresence, dist_kullbackleibler=copresence, correl_spearman=copresence]	[dist_bray=0.5218243889517666	correl_spearman	0.518542	[0.5228431779869775, 4.3632987807087, 0.5280853562686721]	[0.07235255719973656]	[0.5218243889517666, 4.597612429279815, 0.5185419647822265]	[0.5239386246492581, 4.326903838846215, 0.5389376538915721]	copresence	[0.5218243889517666]	[10.0, 10.0, 10.0]	[0.10144390297001754, 1.434557747445225, 0.13295920820981436]	0	[dist_bray=0.1742390356125445, dist_kullbackleibler=4.493158611840187E-8, correl_spearman=0.0733541874831461]	[dist_bray, dist_kullbackleibler, correl_spearman]
12903	12895	Undirected	385	OTU-OTU56->OTU-OTU25		0.45	13835	OTU-OTU56->OTU-OTU25		OTU-OTU56->OTU-OTU25	FALSE		7.9e-05	0.000393	[-0.010227495897208904]	3	[-0.011943360676510428]	[correl_spearman=copresence, dist_kullbackleibler=copresence, dist_bray=copresence]	[correl_spearman=0.44824392090501186	[correl_spearman	0.448244	[0.45556615928198874, 4.580340730460103, 0.4507253853699241]	[0.1515157035900892]	[0.44824392090501186, 4.750683460102302, 0.439421709983831]	[0.4593272954529239, 4.519295868468591, 0.45099397938161584]	copresence	[0.44824392090501186]	[60.0, 60.0, 60.0]	[0.15044290236583577, 1.829473318460666, 0.10852546229187782]	7.9e-05	[correl_spearman=0.11403869398059513, dist_kullbackleibler=6.908580354836324E-5, dist_bray=0.15303273627052705]	[correl_spearman, dist_kullbackleibler, dist_bray]
12903	12767	Undirected	386	OTU-OTU56->OTU-OTU43		0.5	13814	OTU-OTU56->OTU-OTU43		OTU-OTU56->OTU-OTU43	FALSE		0.000598	0.002369	[8.930098997602265]	3	[9.108719525832685]	[dist_kullbackleibler=copresence, dist_bray=copresence, correl_spearman=copresence]	[dist_kullbackleibler=4.810887992454083	correl_spearman	0.500919	[4.825714848597059, 0.5758240801931367, 0.47212506122107306]	[1.7877339985185574]	[4.810887992454083, 0.5693962311964407, 0.5009188648450915]	[4.677334323062588, 0.5847524513776277, 0.4780096535419962]	copresence	[4.810887992454083]	[64.0, 64.0, 64.0]	[1.5799220410824795, 0.07249200991768708, 0.1472047589969807]	0.000598	[dist_kullbackleibler=3.2785303199922566E-4, dist_bray=0.28577683023092426, correl_spearman=0.11921642971528745]	[dist_kullbackleibler, dist_bray, correl_spearman]
12903	12922	Undirected	387	OTU-OTU56->OTU-OTU44		0.51	13811	OTU-OTU56->OTU-OTU44		OTU-OTU56->OTU-OTU44	FALSE		0	0	[0.0071371733958939835]	3	[-0.007390285524573108]	[correl_spearman=copresence, dist_bray=copresence, dist_kullbackleibler=copresence]	[correl_spearman=0.5125520605752318	[correl_spearman	0.512552	[0.4997520069376652, 0.40328785242808035, 3.130881874664405]	[0.15163956535442483]	[0.5125520605752318, 0.41943286864665563, 3.167955602150194]	[0.5176131579141601, 0.4020449966508166, 3.067791745266245]	copresence	[0.5125520605752318]	[58.0, 58.0, 58.0]	[0.13210196132719948, 0.05896413519409475, 1.0577303309858537]	0	[correl_spearman=0.08145901487544494, dist_bray=0.0647240709750575, dist_kullbackleibler=7.176004235276423E-11]	[correl_spearman, dist_bray, dist_kullbackleibler]
12903	12793	Undirected	388	OTU-OTU56->OTU-OTU52		0.53	13800	OTU-OTU56->OTU-OTU52		OTU-OTU56->OTU-OTU52	FALSE		0	0	[0.7244642219762273]	3	[0.7239612086439975]	[dist_bray=copresence, correl_spearman=copresence, dist_kullbackleibler=copresence]	[dist_bray=0.5184902210986821	correl_spearman	0.530347	[0.516024865321723, 0.535329130814296, 3.002904486635966]	[0.06250588477333184]	[0.5184902210986821, 0.5303471233349981, 3.1375420198876376]	[0.5210966844195523, 0.5419785016733755, 2.8320981017378215]	copresence	[0.5184902210986821]	[66.0, 66.0, 66.0]	[0.06852371043440231, 0.13493906892145077, 0.7588063135419911]	0	[dist_bray=0.21349688066096417, correl_spearman=0.07088641685672886, dist_kullbackleibler=2.906512808209527E-10]	[dist_bray, correl_spearman, dist_kullbackleibler]
12903	12879	Undirected	389	OTU-OTU56->OTU-OTU58		0.47	13799	OTU-OTU56->OTU-OTU58		OTU-OTU56->OTU-OTU58	FALSE		0	0	[-7.601094557616298E-4]	3	[-0.011653998175737307]	[correl_spearman=copresence, dist_kullbackleibler=copresence, dist_bray=copresence]	[correl_spearman=0.4726360595925815	[correl_spearman	0.472636	[0.4676557246536687, 4.12752737421308, 0.5403032118197895]	[0.16571812879126938]	[0.4726360595925815, 4.149067779881413, 0.546418754549495]	[0.48956170406531957, 3.9919914997238637, 0.53755949643766]	copresence	[0.4726360595925815]	[46.0, 46.0, 46.0]	[0.14101167684833563, 1.4365296847536497, 0.09971038490811167]	0	[correl_spearman=0.10090608918744742, dist_kullbackleibler=3.755556754470035E-9, dist_bray=0.20243857755609296]	[correl_spearman, dist_kullbackleibler, dist_bray]
12903	12858	Undirected	390	OTU-OTU56->OTU-OTU64		0.49	13794	OTU-OTU56->OTU-OTU64		OTU-OTU56->OTU-OTU64	FALSE		9e-06	5.5e-05	[9.711341850685411]	3	[9.743813838249471]	[dist_kullbackleibler=copresence, dist_bray=copresence, correl_spearman=copresence]	[dist_kullbackleibler=4.39019450756453	correl_spearman	0.49193	[4.285279088489034, 0.5501507530200326, 0.4994066428388471]	[2.0279843894860097]	[4.39019450756453, 0.5545164485973537, 0.4919295026367643]	[3.8094924173321427, 0.5440653903719413, 0.5212792210149709]	copresence	[4.39019450756453]	[66.0, 66.0, 66.0]	[1.540531197117736, 0.11101618531778006, 0.14445764668868794]	9e-06	[dist_kullbackleibler=5.466318031333017E-6, dist_bray=0.23203085694195535, correl_spearman=0.09753862222250659]	[dist_kullbackleibler, dist_bray, correl_spearman]
12903	12773	Undirected	391	OTU-OTU56->OTU-OTU65		0.44	13793	OTU-OTU56->OTU-OTU65		OTU-OTU56->OTU-OTU65	FALSE		7e-06	4.4e-05	[0.02325934934630587]	3	[0.009303739738522358]	[correl_spearman=copresence, dist_kullbackleibler=copresence, dist_bray=copresence]	[correl_spearman=0.44481605351170583	[correl_spearman	0.444816	[0.4260432967399413, 5.513192225198999, 0.6404762450582193]	[0.14456633942664568]	[0.44481605351170583, 5.582879551713903, 0.6385617964315504]	[0.4292353956047859, 5.5648774662601594, 0.6516677283643884]	copresence	[0.44481605351170583]	[18.0, 18.0, 18.0]	[0.13877364625644567, 1.6140116038279322, 0.1075255308584592]	7e-06	[correl_spearman=0.131635398388939, dist_kullbackleibler=2.4183601615712647E-6, dist_bray=0.29632513987676334]	[correl_spearman, dist_kullbackleibler, dist_bray]
12903	12798	Undirected	392	OTU-OTU56->OTU-OTU98		0.28	13762	OTU-OTU56->OTU-OTU98		OTU-OTU56->OTU-OTU98	FALSE		0.000478	0.001935	[0.01694559176449245]	3	[-0.00851161397791819]	[correl_spearman=mutualExclusion, dist_bray=mutualExclusion, dist_kullbackleibler=mutualExclusion]	[correl_spearman=-0.28292419730143786	[correl_spearman	-0.282924	[-0.2930631117435311, 0.9662801485645787, 19.269216559806498]	[0.14694462974953496]	[-0.28292419730143786, 0.9816255983975324, 20.0907257595312]	[-0.2968274297209327, 0.9785054994287083, 19.417224276267063]	mutualExclusion	[-0.28292419730143786]	[52.0, 52.0, 52.0]	[0.14671396822153704, 0.04757437568167912, 1.9212850629635323]	0.000478	[correl_spearman=0.2287738131384185, dist_bray=0.3630203819817067, dist_kullbackleibler=1.0467759300947233E-4]	[correl_spearman, dist_bray, dist_kullbackleibler]
12896	12908	Undirected	393	OTU-OTU1->OTU-OTU11		0.47	13851	OTU-OTU1->OTU-OTU11		OTU-OTU1->OTU-OTU11	FALSE		0	0	[0.8442858625699329]	3	[0.8259877293280191]	[dist_bray=copresence, correl_spearman=copresence, dist_kullbackleibler=copresence]	[dist_bray=0.5532679274834595	correl_spearman	0.472438	[0.5516415994547089, 0.4766521346164935, 3.845771285797347]	[0.07101719571064513]	[0.5532679274834595, 0.4724382927996334, 3.8422750133239507]	[0.555407809407478, 0.47202027530839286, 3.8880575351346245]	copresence	[0.5532679274834595]	[32.0, 32.0, 32.0]	[0.08903720163179683, 0.12029867542474362, 1.1252776247569314]	0	[dist_bray=0.17893844182476304, correl_spearman=0.08507544567837577, dist_kullbackleibler=3.796518655008185E-12]	[dist_bray, correl_spearman, dist_kullbackleibler]
12896	13046	Undirected	394	OTU-OTU1->OTU-OTU33		0.31	13827	OTU-OTU1->OTU-OTU33		OTU-OTU1->OTU-OTU33	FALSE		0.006195	0.019513	[0.6929657818530912]	3	[0.6876422754919573]	[dist_bray=copresence, correl_spearman=copresence, dist_kullbackleibler=copresence]	[dist_bray=0.6246251881485196	correl_spearman	0.305463	[0.6166854677827408, 0.32342296821733707, 4.620462264688159]	[0.05739538985769985]	[0.6246251881485196, 0.3054632039984391, 4.865875371259634]	[0.6122756300832048, 0.3184603982776967, 4.54177995602984]	copresence	[0.6246251881485196]	[96.0, 96.0, 96.0]	[0.06603095766658885, 0.14863739125213565, 1.0263514173839197]	0.006195	[dist_bray=0.3912224792200214, correl_spearman=0.18871061549430618, dist_kullbackleibler=0.0021853361622714562]	[dist_bray, correl_spearman, dist_kullbackleibler]
12896	12767	Undirected	395	OTU-OTU1->OTU-OTU43		0.56	13818	OTU-OTU1->OTU-OTU43		OTU-OTU1->OTU-OTU43	FALSE		0	0	[7.631164525040497]	3	[7.775190986435302]	[dist_kullbackleibler=copresence, correl_spearman=copresence, dist_bray=copresence]	[dist_kullbackleibler=2.693971517819557	correl_spearman	0.563771	[2.7204444325237787, 0.5625512529289339, 0.5024919144783181]	[1.6928975201508287]	[2.693971517819557, 0.5637705374547479, 0.4917871727379791]	[2.577954947570846, 0.5762565449604948, 0.5015884160943791]	copresence	[2.693971517819557]	[94.0, 94.0, 94.0]	[0.6837404102547052, 0.11789471134332348, 0.05922344635348103]	0	[dist_kullbackleibler=4.889042504174768E-10, correl_spearman=0.05583026791180201, dist_bray=0.23100355974241094]	[dist_kullbackleibler, correl_spearman, dist_bray]
12896	12793	Undirected	396	OTU-OTU1->OTU-OTU52		0.43	13805	OTU-OTU1->OTU-OTU52		OTU-OTU1->OTU-OTU52	FALSE		0.000174	0.0008	[0.673442374434593]	3	[0.6725066912228387]	[dist_bray=copresence, correl_spearman=copresence, dist_kullbackleibler=copresence]	[dist_bray=0.535872678353086	correl_spearman	0.426472	[0.5367652387604088, 0.4093516535050112, 3.530515907511581]	[0.06064143201130089]	[0.535872678353086, 0.4264724704480685, 3.431018566511746]	[0.5389299373669434, 0.4339006557149139, 3.4962160464134184]	copresence	[0.535872678353086]	[96.0, 96.0, 96.0]	[0.05479833510246812, 0.13917119838739597, 0.8700334844988177]	0.000174	[dist_bray=0.2810019682264513, correl_spearman=0.12852779782902374, dist_kullbackleibler=7.938498912940517E-5]	[dist_bray, correl_spearman, dist_kullbackleibler]
12896	12886	Undirected	397	OTU-OTU1->OTU-OTU54		0.44	13804	OTU-OTU1->OTU-OTU54		OTU-OTU1->OTU-OTU54	FALSE		0.007198	0.022272	[5.409397334063347]	3	[5.548852153958706]	[dist_kullbackleibler=mutualExclusion, dist_bray=mutualExclusion, correl_spearman=mutualExclusion]	[dist_kullbackleibler=8.289072489116705	correl_spearman	-0.443576	[8.065733512321092, 0.7660383230606271, -0.4236575119182377]	[0.9698958185013695]	[8.289072489116705, 0.7735363791887533, -0.44357566875812493]	[8.100109685427201, 0.7701791436203788, -0.4249713282478961]	mutualExclusion	[8.289072489116705]	[96.0, 96.0, 96.0]	[0.9059870899379749, 0.05768626157658843, 0.13618358826345697]	0.007198	[dist_kullbackleibler=0.004093665033208516, dist_bray=0.33288933620108596, correl_spearman=0.14133498629611607]	[dist_kullbackleibler, dist_bray, correl_spearman]
12896	12798	Undirected	399	OTU-OTU1->OTU-OTU98		0.23	13766	OTU-OTU1->OTU-OTU98		OTU-OTU1->OTU-OTU98	FALSE		0.014624	0.042029	[-0.008430185361403261]	3	[-0.01945943973507644]	[correl_spearman=mutualExclusion, dist_bray=mutualExclusion, dist_kullbackleibler=mutualExclusion]	[correl_spearman=-0.23247307767801875	[correl_spearman	-0.232473	[-0.23346227931495872, 0.9600162968271232, 16.64454914502102]	[0.1607394074948265]	[-0.23247307767801875, 0.9699346699204217, 17.54483472516244]	[-0.21845768655262662, 0.9682554222140394, 16.943023053446975]	mutualExclusion	[-0.23247307767801875]	[82.0, 82.0, 82.0]	[0.14382103046195877, 0.03757851683118418, 1.9710977655784885]	0.014624	[correl_spearman=0.2862757476784501, dist_bray=0.3607751492517267, dist_kullbackleibler=0.00436275652687701]	[correl_spearman, dist_bray, dist_kullbackleibler]
12896	12802	Undirected	400	OTU-OTU1->OTU-OTU101		0.46	13406	OTU-OTU1->OTU-OTU101		OTU-OTU1->OTU-OTU101	FALSE		0.000978	0.003695	[0.007728703349882791]	3	[0.006307173983743637]	[correl_spearman=copresence, dist_kullbackleibler=copresence, dist_bray=copresence]	[correl_spearman=0.4615140000358581	[correl_spearman	0.461514	[0.46463282977845677, 4.435146442237792, 0.5930563047565778]	[0.14560641570664226]	[0.4615140000358581, 4.645062593333963, 0.6041562907722853]	[0.4810721661810929, 4.444848351657388, 0.5948638356701212]	copresence	[0.4615140000358581]	[96.0, 96.0, 96.0]	[0.13285075968097645, 1.1750846588062425, 0.05538892836991841]	0.000978	[correl_spearman=0.1042946216524413, dist_kullbackleibler=5.583028434776871E-4, dist_bray=0.332535806081546]	[correl_spearman, dist_kullbackleibler, dist_bray]
12896	12862	Undirected	401	OTU-OTU1->OTU-OTU112		0.39	13388	OTU-OTU1->OTU-OTU112		OTU-OTU1->OTU-OTU112	FALSE		0.000908	0.003449	[-0.006222762548342166]	3	[4.180596275571333E-4]	[correl_spearman=copresence, dist_bray=copresence, dist_kullbackleibler=copresence]	[correl_spearman=0.39220594006346643	[correl_spearman	0.392206	[0.37162475483079943, 0.656707074538045, 4.957549948348921]	[0.14210825736356958]	[0.39220594006346643, 0.6553580737603537, 4.786276892344936]	[0.3736058236781561, 0.664108927474493, 4.814883524448064]	copresence	[0.39220594006346643]	[96.0, 96.0, 96.0]	[0.13154289930544893, 0.07824561976255236, 1.1214832992540074]	0.000908	[correl_spearman=0.15303895253077893, dist_bray=0.3791191185901085, dist_kullbackleibler=3.0671923982006355E-4]	[correl_spearman, dist_bray, dist_kullbackleibler]
12895	12908	Undirected	402	OTU-OTU25->OTU-OTU11		0.48	13950	OTU-OTU25->OTU-OTU11		OTU-OTU25->OTU-OTU11	FALSE		0	0	[11.194607395776053]	3	[11.092568404904908]	[dist_kullbackleibler=copresence, dist_bray=copresence, correl_spearman=copresence]	[dist_kullbackleibler=4.32150820339637	correl_spearman	0.482097	[4.048677812859333, 0.5224087399814259, 0.48950725803016915]	[2.2638350651588808]	[4.32150820339637, 0.5192918388355809, 0.4820971190399858]	[3.8383655029363877, 0.5278705573054454, 0.5049282229953567]	copresence	[4.32150820339637]	[28.0, 28.0, 28.0]	[1.5265013210441352, 0.11997685639610849, 0.12763039614872504]	0	[dist_kullbackleibler=5.94938653897259E-9, dist_bray=0.1783642680233617, correl_spearman=0.07659440946561458]	[dist_kullbackleibler, dist_bray, correl_spearman]
12895	12767	Undirected	406	OTU-OTU25->OTU-OTU43		0.44	13909	OTU-OTU25->OTU-OTU43		OTU-OTU25->OTU-OTU43	FALSE		0.003042	0.010311	[0.7000468033902982]	3	[0.6960581022346528]	[dist_bray=copresence, dist_kullbackleibler=copresence, correl_spearman=copresence]	[dist_bray=0.5300097529608985	correl_spearman	0.444755	[0.5247776509307277, 4.369218450858905, 0.4420017504321444]	[0.05903413466007359]	[0.5300097529608985, 4.460859170820305, 0.4447550307508475]	[0.5191113522375341, 4.17957874441412, 0.45656515635852696]	copresence	[0.5300097529608985]	[90.0, 90.0, 90.0]	[0.07259035607784727, 1.657369889090596, 0.1391923569489585]	0.003042	[dist_bray=0.26247829517144183, dist_kullbackleibler=0.002185294497627055, correl_spearman=0.12277713567857629]	[dist_bray, dist_kullbackleibler, correl_spearman]
12895	12922	Undirected	407	OTU-OTU25->OTU-OTU44		0.37	13908	OTU-OTU25->OTU-OTU44		OTU-OTU25->OTU-OTU44	FALSE		0.001561	0.005629	[-0.02428774928774927]	3	[-0.030488603988603966]	[correl_spearman=copresence, dist_kullbackleibler=copresence, dist_bray=copresence]	[correl_spearman=0.37193732193732165	[correl_spearman	0.371937	[0.35149798639901697, 4.781523241744989, 0.5262621302240867]	[0.13555167008840555]	[0.37193732193732165, 4.695628878166888, 0.5162581554904312]	[0.3710534930696821, 4.715693095689125, 0.535803592865565]	copresence	[0.37193732193732165]	[84.0, 84.0, 84.0]	[0.14790944522974608, 1.6148750478327338, 0.08199621525258069]	0.001561	[correl_spearman=0.16029875443810065, dist_kullbackleibler=9.06343262060183E-4, dist_bray=0.22596811850666976]	[correl_spearman, dist_kullbackleibler, dist_bray]
12895	12793	Undirected	408	OTU-OTU25->OTU-OTU52		0.26	13903	OTU-OTU25->OTU-OTU52		OTU-OTU25->OTU-OTU52	FALSE		0.007459	0.023	[0.6890765935501266]	3	[0.6829410471399475]	[dist_bray=copresence, dist_kullbackleibler=copresence, correl_spearman=copresence]	[dist_bray=0.5841103426776122	correl_spearman	0.260948	[0.5805036738726349, 4.250992957091074, 0.25991419172975455]	[0.05743071025363967]	[0.5841103426776122, 4.298618530233484, 0.26094849478374305]	[0.5849010653399881, 4.171067233505722, 0.2758321073841933]	copresence	[0.5841103426776122]	[92.0, 92.0, 92.0]	[0.06693212852486188, 1.0633634805008214, 0.16665662843207357]	0.007459	[dist_bray=0.3460706988110984, dist_kullbackleibler=0.002330228120228872, correl_spearman=0.24914771855405066]	[dist_bray, dist_kullbackleibler, correl_spearman]
12895	12886	Undirected	409	OTU-OTU25->OTU-OTU54		0.59	13902	OTU-OTU25->OTU-OTU54		OTU-OTU25->OTU-OTU54	FALSE		0.000372	0.001561	[0.6746293534795843]	3	[0.6720027980784049]	[dist_bray=mutualExclusion, correl_spearman=mutualExclusion, dist_kullbackleibler=mutualExclusion]	[dist_bray=0.7979282920682998	correl_spearman	-0.593196	[0.7903125058023988, -0.5854003156785577, 8.594695022955507]	[0.05217629842639953]	[0.7979282920682998, -0.593196325736588, 8.87188689092284]	[0.7937008082159416, -0.6098895206837978, 8.674378890366121]	mutualExclusion	[0.7979282920682998]	[92.0, 92.0, 92.0]	[0.04315101096428369, 0.11339140635483878, 0.8879262813550287]	0.000372	[dist_bray=0.284494571726956, correl_spearman=0.041684587010756835, dist_kullbackleibler=5.56641452518658E-4]	[dist_bray, correl_spearman, dist_kullbackleibler]
12895	12858	Undirected	410	OTU-OTU25->OTU-OTU64		0.68	13893	OTU-OTU25->OTU-OTU64		OTU-OTU25->OTU-OTU64	FALSE		0	2e-06	[9.09130419821546]	3	[9.026418856534928]	[dist_kullbackleibler=copresence, correl_spearman=copresence, dist_bray=copresence]	[dist_kullbackleibler=3.178890189161983	correl_spearman	0.680035	[3.008877113580239, 0.6799414611020976, 0.4435497714698105]	[2.0466329488456387]	[3.178890189161983, 0.6800352397065493, 0.4475724155242766]	[3.087359726391489, 0.6865813559540084, 0.4587982140542819]	copresence	[3.178890189161983]	[92.0, 92.0, 92.0]	[1.5722583775891787, 0.12103027984760725, 0.07997700110149318]	0	[dist_kullbackleibler=7.970173961924232E-7, correl_spearman=0.023688766636501213, dist_bray=0.12499253021895407]	[dist_kullbackleibler, correl_spearman, dist_bray]
12895	12773	Undirected	411	OTU-OTU25->OTU-OTU65		0.39	13891	OTU-OTU25->OTU-OTU65		OTU-OTU25->OTU-OTU65	FALSE		0.000276	0.001202	[10.316802243008304]	3	[10.449644328408136]	[dist_kullbackleibler=copresence, correl_spearman=copresence, dist_bray=copresence]	[dist_kullbackleibler=5.541138318851707	correl_spearman	0.385996	[5.479388060014039, 0.37736235091854664, 0.593958382457537]	[1.90057750902113]	[5.541138318851707, 0.38599599623566844, 0.6091513778563922]	[5.1377847290893826, 0.38347644961885197, 0.599379934720188]	copresence	[5.541138318851707]	[40.0, 40.0, 40.0]	[1.8008156471887893, 0.15574505009039963, 0.09334685771360063]	0.000276	[dist_kullbackleibler=1.062089175476455E-4, correl_spearman=0.18080678488851037, dist_bray=0.24684992317404353]	[dist_kullbackleibler, correl_spearman, dist_bray]
12895	12822	Undirected	413	OTU-OTU25->OTU-OTU87		0.57	13876	OTU-OTU25->OTU-OTU87		OTU-OTU25->OTU-OTU87	FALSE		0	0	[-0.003257432438473996]	3	[-2.5373684257586906E-4]	[correl_spearman=copresence, dist_kullbackleibler=copresence, dist_bray=copresence]	[correl_spearman=0.5742681945217104	[correl_spearman	0.574268	[0.5765523333919244, 2.654661761111205, 0.564132473403017]	[0.14501947338685378]	[0.5742681945217104, 2.702066332518517, 0.5760881747740159]	[0.5867899792708833, 2.6599809356733335, 0.5643243498279067]	copresence	[0.5742681945217104]	[92.0, 92.0, 92.0]	[0.1106049694815072, 0.5123104027799048, 0.0828476570582064]	0	[correl_spearman=0.04142596194857773, dist_kullbackleibler=1.111859493363454E-9, dist_bray=0.3243782231429915]	[correl_spearman, dist_kullbackleibler, dist_bray]
12895	13000	Undirected	414	OTU-OTU25->OTU-OTU88		0.46	13875	OTU-OTU25->OTU-OTU88		OTU-OTU25->OTU-OTU88	FALSE		0.000202	0.000907	[0.714049292686008]	3	[0.7126699920996349]	[dist_bray=copresence, correl_spearman=copresence, dist_kullbackleibler=copresence]	[dist_bray=0.5911211329614808	correl_spearman	0.462919	[0.5832695429251157, 0.4584362302711331, 4.325360924120097]	[0.04813142825715339]	[0.5911211329614808, 0.4629192778289075, 4.420416064403566]	[0.582594896227832, 0.45601159700089666, 4.3794120584027265]	copresence	[0.5911211329614808]	[92.0, 92.0, 92.0]	[0.07323123564661069, 0.14042260681001106, 1.0595091215639558]	0.000202	[dist_bray=0.31626253883892363, correl_spearman=0.11426353948155277, dist_kullbackleibler=9.325291992190454E-5]	[dist_bray, correl_spearman, dist_kullbackleibler]
12895	12798	Undirected	415	OTU-OTU25->OTU-OTU98		0.43	13873	OTU-OTU25->OTU-OTU98		OTU-OTU25->OTU-OTU98	FALSE		3e-06	2.1e-05	[-0.034324393375314524]	3	[-0.027521659917731135]	[correl_spearman=mutualExclusion, dist_bray=mutualExclusion, dist_kullbackleibler=mutualExclusion]	[correl_spearman=-0.4321260471250124	[correl_spearman	-0.432126	[-0.4372088897824749, 0.9752264444475742, 19.348049623158015]	[0.14996341976672883]	[-0.4321260471250124, 0.9782982391398714, 20.27013888572543]	[-0.441966549546423, 0.9780764667855067, 19.73412454314431]	mutualExclusion	[-0.4321260471250124]	[78.0, 78.0, 78.0]	[0.11042290338500109, 0.016325860093313826, 1.7056878721587565]	3e-06	[correl_spearman=0.10880918941859363, dist_bray=0.24943920297018962, dist_kullbackleibler=1.4750871396573828E-6]	[correl_spearman, dist_bray, dist_kullbackleibler]
12895	12896	Undirected	416	OTU-OTU25->OTU-OTU1		0.35	12897	OTU-OTU25->OTU-OTU1		OTU-OTU25->OTU-OTU1	FALSE		0.007005	0.021757	[9.256064252247903]	3	[9.212676473499675]	[dist_kullbackleibler=copresence, dist_bray=copresence, correl_spearman=copresence]	[dist_kullbackleibler=5.584974613238433	correl_spearman	0.345467	[5.654917961864046, 0.651127065520868, 0.3292262931139838]	[2.015139681951328]	[5.584974613238433, 0.6514344199915078, 0.3454667797440877]	[5.59335860666754, 0.6571380325072322, 0.33712185823808705]	copresence	[5.584974613238433]	[90.0, 90.0, 90.0]	[1.61206381657302, 0.07313056345296466, 0.14631166994110406]	0.007005	[dist_kullbackleibler=0.0025384692852201685, dist_bray=0.36877827015915, correl_spearman=0.19923548067834718]	[dist_kullbackleibler, dist_bray, correl_spearman]
12884	12862	Undirected	417	OTU-OTU55->OTU-OTU112		0.32	14010	OTU-OTU55->OTU-OTU112		OTU-OTU55->OTU-OTU112	FALSE		0.002046	0.00718	[0.8541185579937531]	3	[0.8446025221150011]	[dist_bray=mutualExclusion, dist_kullbackleibler=mutualExclusion, correl_spearman=mutualExclusion]	[dist_bray=0.9230708572208541	correl_spearman	-0.317454	[0.9143288416356349, 16.261507096269845, -0.33104973561732026]	[0.05707119810760313]	[0.9230708572208541, 17.160696971100986, -0.31745425774675334]	[0.9246326672502481, 16.7430282998295, -0.31326296257605674]	mutualExclusion	[0.9230708572208541]	[90.0, 90.0, 90.0]	[0.04920968541375073, 2.504111961387615, 0.14533687854574326]	0.002046	[dist_bray=0.3766391610216768, dist_kullbackleibler=6.362622012571206E-4, correl_spearman=0.18645519363851526]	[dist_bray, dist_kullbackleibler, correl_spearman]
12884	12908	Undirected	418	OTU-OTU55->OTU-OTU11		0.23	13573	OTU-OTU55->OTU-OTU11		OTU-OTU55->OTU-OTU11	FALSE		0.008295	0.025312	[13.629974030162284]	3	[13.14730704921674]	[dist_kullbackleibler=mutualExclusion, dist_bray=mutualExclusion, correl_spearman=mutualExclusion]	[dist_kullbackleibler=18.180792013344547	correl_spearman	-0.225206	[17.15733931988552, 0.9522347623140252, -0.2222014927907732]	[3.0857484011979697]	[18.180792013344547, 0.9631754353837932, -0.2252056172371244]	[17.48566971911086, 0.9547310460195141, -0.19917020907262073]	mutualExclusion	[18.180792013344547]	[24.0, 24.0, 24.0]	[2.0073704296008215, 0.027266884303969594, 0.15411731334257675]	0.008295	[dist_kullbackleibler=0.0023251413522588082, dist_bray=0.3545609294409853, correl_spearman=0.2764774222959604]	[dist_kullbackleibler, dist_bray, correl_spearman]
12884	12808	Undirected	419	OTU-OTU55->OTU-OTU21		0.3	13556	OTU-OTU55->OTU-OTU21		OTU-OTU55->OTU-OTU21	FALSE		0.001162	0.004327	[0.8630810307639765]	3	[0.8592709549219663]	[dist_bray=mutualExclusion, dist_kullbackleibler=mutualExclusion, correl_spearman=mutualExclusion]	[dist_bray=0.957455700238894	correl_spearman	-0.298063	[0.9465745023803944, 16.90073805615722, -0.31701305706839716]	[0.05184590243199006]	[0.957455700238894, 17.750786599738408, -0.2980625534134941]	[0.9507501162110238, 17.374208267460634, -0.33712863814958194]	mutualExclusion	[0.957455700238894]	[62.0, 62.0, 62.0]	[0.028126965262625935, 1.8112002598477877, 0.13570477552932972]	0.001162	[dist_bray=0.3013368026111388, dist_kullbackleibler=3.883510055644468E-4, correl_spearman=0.20082836984971053]	[dist_bray, dist_kullbackleibler, correl_spearman]
12884	12767	Undirected	420	OTU-OTU55->OTU-OTU43		0.2	13535	OTU-OTU55->OTU-OTU43		OTU-OTU55->OTU-OTU43	FALSE		0.010889	0.032191	[9.491266599756226]	3	[10.258152018948614]	[dist_kullbackleibler=mutualExclusion, correl_spearman=mutualExclusion, dist_bray=mutualExclusion]	[dist_kullbackleibler=15.242163873548172	correl_spearman	-0.195895	[14.482856508697216, -0.23189507764318765, 0.8972581479306343]	[2.6500640410445038]	[15.242163873548172, -0.19589464627938766, 0.9121003257287781]	[15.213290969004543, -0.22534903452084562, 0.9094016089765155]	mutualExclusion	[15.242163873548172]	[88.0, 88.0, 88.0]	[2.4096450488080645, 0.14462932053623248, 0.06402545337388678]	0.010889	[dist_kullbackleibler=0.003248613273475587, correl_spearman=0.26960128945207584, dist_bray=0.36025089406977606]	[dist_kullbackleibler, correl_spearman, dist_bray]
12884	12822	Undirected	422	OTU-OTU55->OTU-OTU87		0.36	13496	OTU-OTU55->OTU-OTU87		OTU-OTU55->OTU-OTU87	FALSE		0.010875	0.032176	[0.8280727117819887]	3	[0.8185864371967696]	[dist_bray=mutualExclusion, dist_kullbackleibler=mutualExclusion, correl_spearman=mutualExclusion]	[dist_bray=0.9106329644931233	correl_spearman	-0.362977	[0.9003906887947273, 12.531667525709414, -0.3682135308356339]	[0.04745758734229376]	[0.9106329644931233, 13.062575901558263, -0.3629769213063086]	[0.9056972919291818, 12.680130906210628, -0.37219103416404753]	mutualExclusion	[0.9106329644931233]	[90.0, 90.0, 90.0]	[0.04263023412698045, 1.4558660846881792, 0.12348323291875364]	0.010875	[dist_bray=0.34597788910031946, dist_kullbackleibler=0.00612385039972374, correl_spearman=0.1486881630313086]	[dist_bray, dist_kullbackleibler, correl_spearman]
12881	12782	Undirected	423	OTU-OTU109->OTU-OTU10		0.45	13723	OTU-OTU109->OTU-OTU10		OTU-OTU109->OTU-OTU10	FALSE		0	0	[]	3	[]	[dist_bray=copresence, correl_spearman=copresence, dist_kullbackleibler=copresence]	[dist_bray=0.5804700975794467	correl_spearman	0.454223	[-100.0, -100.0, -100.0]	[]	[0.5804700975794467, 0.45422335421288523, 4.091302468493744]	[-100.0, -100.0, -100.0]	copresence	[0.5804700975794467]	[-6.0, -6.0, -6.0]	[-100.0, -100.0, -100.0]	0	[dist_bray=0.21074018808283812, correl_spearman=0.1048122701909373, dist_kullbackleibler=5.1406656709218623E-11]	[dist_bray, correl_spearman, dist_kullbackleibler]
12881	12810	Undirected	427	OTU-OTU109->OTU-OTU45		0.54	13668	OTU-OTU109->OTU-OTU45		OTU-OTU109->OTU-OTU45	FALSE		0	0	[]	3	[]	[correl_spearman=copresence, dist_bray=copresence, dist_kullbackleibler=copresence]	[correl_spearman=0.5383473272199596	[correl_spearman	0.538347	[-100.0, -100.0, -100.0]	[]	[0.5383473272199596, 0.5714105007247681, 3.5354484009804366]	[-100.0, -100.0, -100.0]	copresence	[0.5383473272199596]	[-4.0, -4.0, -4.0]	[-100.0, -100.0, -100.0]	0	[correl_spearman=0.0480340588952477, dist_bray=0.21875638168085643, dist_kullbackleibler=5.417888360170764E-14]	[correl_spearman, dist_bray, dist_kullbackleibler]
12881	12822	Undirected	430	OTU-OTU109->OTU-OTU87		0.4	13603	OTU-OTU109->OTU-OTU87		OTU-OTU109->OTU-OTU87	FALSE		0	0	[]	3	[]	[dist_kullbackleibler=copresence, dist_bray=copresence, correl_spearman=copresence]	[dist_kullbackleibler=3.7380764097043615	correl_spearman	0.403389	[-100.0, -100.0, -100.0]	[]	[3.7380764097043615, 0.5892498020428147, 0.4033892005692199]	[-100.0, -100.0, -100.0]	copresence	[3.7380764097043615]	[-4.0, -4.0, -4.0]	[-100.0, -100.0, -100.0]	0	[dist_kullbackleibler=4.9906070387351065E-9, dist_bray=0.24561754802531166, correl_spearman=0.13062242368056404]	[dist_kullbackleibler, dist_bray, correl_spearman]
12881	12787	Undirected	432	OTU-OTU109->OTU-OTU110		0.51	13041	OTU-OTU109->OTU-OTU110		OTU-OTU109->OTU-OTU110	FALSE		0.008576	0.026121	[]	3	[]	[dist_bray=mutualExclusion, correl_spearman=mutualExclusion, dist_kullbackleibler=mutualExclusion]	[dist_bray=0.8639814750895107	correl_spearman	-0.510312	[-100.0, -100.0, -100.0]	[]	[0.8639814750895107, -0.5103123717753701, 12.03515352885065]	[-100.0, -100.0, -100.0]	mutualExclusion	[0.8639814750895107]	[-4.0, -4.0, -4.0]	[-100.0, -100.0, -100.0]	0.008576	[dist_bray=0.38937508209179506, correl_spearman=0.08288073403956675, dist_kullbackleibler=0.007347632128833603]	[dist_bray, correl_spearman, dist_kullbackleibler]
12879	12802	Undirected	433	OTU-OTU58->OTU-OTU101		0.3	13651	OTU-OTU58->OTU-OTU101		OTU-OTU58->OTU-OTU101	FALSE		0.000522	0.002088	[9.166173843275452]	3	[9.15263317023759]	[dist_kullbackleibler=copresence, dist_bray=copresence, correl_spearman=copresence]	[dist_kullbackleibler=5.5267857207042015	correl_spearman	0.295918	[5.1816542277702755, 0.6312204513634581, 0.3064620103719742]	[1.4096604125041912]	[5.5267857207042015, 0.6456353155140226, 0.29591823869004846]	[5.033692790171067, 0.6297742381666032, 0.3174163695033172]	copresence	[5.5267857207042015]	[70.0, 70.0, 70.0]	[1.18233208482562, 0.07773939889534927, 0.13981216814236977]	0.000522	[dist_kullbackleibler=1.3011539607310496E-4, dist_bray=0.34924372809832793, correl_spearman=0.21115880900310674]	[dist_kullbackleibler, dist_bray, correl_spearman]
12879	12793	Undirected	434	OTU-OTU58->OTU-OTU52		0.51	12972	OTU-OTU58->OTU-OTU52		OTU-OTU58->OTU-OTU52	FALSE		0	1e-06	[8.224866071994906]	3	[8.106431808428617]	[dist_kullbackleibler=copresence, correl_spearman=copresence, dist_bray=copresence]	[dist_kullbackleibler=3.3801568524420813	correl_spearman	0.511543	[3.221319774096353, 0.5079706905151856, 0.504737086111991]	[1.5643689497905848]	[3.3801568524420813, 0.5115430040302383, 0.5193371437505142]	[3.0996945578247708, 0.5218298003704929, 0.4990271572379069]	copresence	[3.3801568524420813]	[70.0, 70.0, 70.0]	[0.8325798467702958, 0.13250664568403905, 0.07658638745019636]	0	[dist_kullbackleibler=4.306467726866714E-8, correl_spearman=0.069348084868677, dist_bray=0.20661519966906094]	[dist_kullbackleibler, correl_spearman, dist_bray]
12879	12791	Undirected	435	OTU-OTU58->OTU-OTU53		0.52	12971	OTU-OTU58->OTU-OTU53		OTU-OTU58->OTU-OTU53	FALSE		0	0	[0.7521280588157495]	3	[0.7400249877665271]	[dist_bray=copresence, dist_kullbackleibler=copresence, correl_spearman=copresence]	[dist_bray=0.5406391149974841	correl_spearman	0.515957	[0.5197431776292263, 3.2817015402859777, 0.5276705463928913]	[0.06440215758129347]	[0.5406391149974841, 3.6118928847803695, 0.5159572730130922]	[0.5258526583587224, 3.237112962888242, 0.5549982645710787]	copresence	[0.5406391149974841]	[70.0, 70.0, 70.0]	[0.08283524341999955, 0.7706546496402014, 0.11354317801681231]	0	[dist_bray=0.22202582267957793, dist_kullbackleibler=1.1710332925574107E-8, correl_spearman=0.0697928377390945]	[dist_bray, dist_kullbackleibler, correl_spearman]
12879	12798	Undirected	436	OTU-OTU58->OTU-OTU98		0.08	12890	OTU-OTU58->OTU-OTU98		OTU-OTU58->OTU-OTU98	FALSE		0.005508	0.017539	[0.9209789253340599]	3	[0.9033068611713437]	[dist_bray=mutualExclusion, correl_spearman=mutualExclusion, dist_kullbackleibler=mutualExclusion]	[dist_bray=0.9587412651484049	correl_spearman	-0.083011	[0.9516347829718063, -0.09791245084181957, 17.973154541736076]	[0.06444708824924905]	[0.9587412651484049, -0.08301100459081764, 18.92088251368813]	[0.9589025001090757, -0.1069043188331106, 18.27522570373637]	mutualExclusion	[0.9587412651484049]	[60.0, 60.0, 60.0]	[0.028793635959870906, 0.14677835065296657, 1.7974838423052324]	0.005508	[dist_bray=0.38789620397597535, correl_spearman=0.38631134055641503, dist_kullbackleibler=9.377908115865141E-4]	[dist_bray, correl_spearman, dist_kullbackleibler]
12875	12787	Undirected	439	OTU-OTU16->OTU-OTU110		0.78	13224	OTU-OTU16->OTU-OTU110		OTU-OTU16->OTU-OTU110	FALSE		0	0	[0.03733163943723331]	3	[0.008382836760235985]	[correl_spearman=mutualExclusion, dist_kullbackleibler=mutualExclusion, dist_bray=mutualExclusion]	[correl_spearman=-0.7785530529240253	[correl_spearman	-0.778553	[-0.7664671106933426, 13.460449632290965, 0.9130864145285538]	[0.14886286729306017]	[-0.7785530529240253, 13.754790466209847, 0.9166944267701943]	[-0.7735073192363956, 13.523854978396503, 0.9139605941909783]	mutualExclusion	[-0.7785530529240253]	[96.0, 96.0, 96.0]	[0.06408379685970447, 0.9920915723433745, 0.028932914585974474]	0	[correl_spearman=0.001103510685841691, dist_kullbackleibler=1.770815383217439E-9, dist_bray=0.14179089179037363]	[correl_spearman, dist_kullbackleibler, dist_bray]
12875	12785	Undirected	440	OTU-OTU16->OTU-OTU111		0.44	13222	OTU-OTU16->OTU-OTU111		OTU-OTU16->OTU-OTU111	FALSE		0	0	[11.755963591553998]	3	[12.051383493534233]	[dist_kullbackleibler=copresence, correl_spearman=copresence, dist_bray=copresence]	[dist_kullbackleibler=3.49897369046658	correl_spearman	0.442098	[3.834644789528767, 0.4326063601423801, 0.5345941016661853]	[3.1911109217342526]	[3.49897369046658, 0.44209818667405115, 0.5488586085696749]	[3.221906520027055, 0.43600167281429103, 0.5239059213089894]	copresence	[3.49897369046658]	[76.0, 76.0, 76.0]	[1.8162532057988154, 0.13897879190807155, 0.11633058701427816]	0	[dist_kullbackleibler=5.406208813951707E-10, correl_spearman=0.1178471236919108, dist_bray=0.16493364805999455]	[dist_kullbackleibler, correl_spearman, dist_bray]
12875	12777	Undirected	442	OTU-OTU16->OTU-OTU13		0.55	13039	OTU-OTU16->OTU-OTU13		OTU-OTU16->OTU-OTU13	FALSE		3.1e-05	0.000167	[0.7223910705018761]	3	[0.7247274515657617]	[dist_bray=mutualExclusion, dist_kullbackleibler=mutualExclusion, correl_spearman=mutualExclusion]	[dist_bray=0.8665356919254914	correl_spearman	-0.551639	[0.8591087449579695, 12.50916329067919, -0.552676226021699]	[0.06132587119131974]	[0.8665356919254914, 12.843134780171619, -0.5516388102944312]	[0.8642338645633435, 12.671781852538528, -0.5567816441621121]	mutualExclusion	[0.8665356919254914]	[96.0, 96.0, 96.0]	[0.04324779199492564, 1.28553263608038, 0.10367577035016631]	3.1e-05	[dist_bray=0.25907978859414416, dist_kullbackleibler=3.974719062582732E-5, correl_spearman=0.04330371977385439]	[dist_bray, dist_kullbackleibler, correl_spearman]
12875	12775	Undirected	443	OTU-OTU16->OTU-OTU14		0.57	13038	OTU-OTU16->OTU-OTU14		OTU-OTU16->OTU-OTU14	FALSE		0	0	[0.011786579263895997]	3	[0.007833427505733785]	[correl_spearman=copresence, dist_kullbackleibler=copresence, dist_bray=copresence]	[correl_spearman=0.5703663277860083	[correl_spearman	0.570366	[0.5781723606759392, 3.377278241549562, 0.5411063649733457]	[0.13905808967628827]	[0.5703663277860083, 3.638599315996812, 0.569301774407871]	[0.5802966527861937, 3.3315159260665403, 0.5485124211058952]	copresence	[0.5703663277860083]	[28.0, 28.0, 28.0]	[0.12396813949827634, 1.078626886441777, 0.10481466443736454]	0	[correl_spearman=0.052630978288755514, dist_kullbackleibler=7.815970093361102E-14, dist_bray=0.19560318148463451]	[correl_spearman, dist_kullbackleibler, dist_bray]
12875	12806	Undirected	446	OTU-OTU16->OTU-OTU22		0.66	13026	OTU-OTU16->OTU-OTU22		OTU-OTU16->OTU-OTU22	FALSE		0	0	[-0.0021068526213856844]	3	[-0.008874364220222414]	[correl_spearman=copresence, dist_kullbackleibler=copresence, dist_bray=copresence]	[correl_spearman=0.6570370389264213	[correl_spearman	0.657037	[0.6644652905377961, 3.3735287396218308, 0.5344073672727888]	[0.1457762270753569]	[0.6570370389264213, 3.844042985871957, 0.5808582138083889]	[0.6813834932443328, 3.359955659993695, 0.5528872907575194]	copresence	[0.6570370389264213]	[6.0, 6.0, 6.0]	[0.0940388391063827, 0.8878446537755296, 0.11156012015950798]	0	[correl_spearman=0.014055342766805423, dist_kullbackleibler=4.440892098500626E-16, dist_bray=0.2277928718443376]	[correl_spearman, dist_kullbackleibler, dist_bray]
12875	12847	Undirected	447	OTU-OTU16->OTU-OTU27		0.48	13025	OTU-OTU16->OTU-OTU27		OTU-OTU16->OTU-OTU27	FALSE		1e-06	8e-06	[9.807396986126822]	3	[10.114026418918694]	[dist_kullbackleibler=copresence, correl_spearman=copresence, dist_bray=copresence]	[dist_kullbackleibler=4.263080916162609	correl_spearman	0.480204	[4.337272414030574, 0.4775570105226947, 0.5157043400777263]	[2.2448799341810566]	[4.263080916162609, 0.48020418810908594, 0.5163726774092835]	[4.2788809440794635, 0.4810628069265137, 0.5174171112636563]	copresence	[4.263080916162609]	[90.0, 90.0, 90.0]	[1.424093703629278, 0.13557737799548858, 0.09519031229790344]	1e-06	[dist_kullbackleibler=6.46679816695972E-7, correl_spearman=0.09509119776480118, dist_bray=0.21740993962214117]	[dist_kullbackleibler, correl_spearman, dist_bray]
12875	12844	Undirected	448	OTU-OTU16->OTU-OTU29		0.63	13022	OTU-OTU16->OTU-OTU29		OTU-OTU16->OTU-OTU29	FALSE		0	0	[-0.020233326621238036]	3	[-0.01685580631310708]	[correl_spearman=copresence, dist_kullbackleibler=copresence, dist_bray=copresence]	[correl_spearman=0.6270886014967989	[correl_spearman	0.627089	[0.6177632503669406, 2.598981401876144, 0.38122945780446055]	[0.1514613319213252]	[0.6270886014967989, 2.439843516845559, 0.3797891052623633]	[0.630763802530071, 2.2910397424020355, 0.3835580108042739]	copresence	[0.6270886014967989]	[84.0, 84.0, 84.0]	[0.12838647440627698, 1.265069809234052, 0.08970090935791296]	0	[correl_spearman=0.03826851482581639, dist_kullbackleibler=4.196643033083092E-14, dist_bray=0.08547259024271248]	[correl_spearman, dist_kullbackleibler, dist_bray]
12875	12917	Undirected	449	OTU-OTU16->OTU-OTU30		0.35	13017	OTU-OTU16->OTU-OTU30		OTU-OTU16->OTU-OTU30	FALSE		0.00825	0.025195	[9.872000787803408]	3	[9.742673137223495]	[dist_kullbackleibler=mutualExclusion, correl_spearman=mutualExclusion, dist_bray=mutualExclusion]	[dist_kullbackleibler=13.72278590970279	correl_spearman	-0.349015	[13.067563818548258, -0.3303302527146436, 0.900539176537392]	[2.5311750127895998]	[13.72278590970279, -0.34901498679875, 0.9169269535543629]	[13.526307832119517, -0.3333261045261572, 0.912840390312538]	mutualExclusion	[13.72278590970279]	[96.0, 96.0, 96.0]	[1.546453279145977, 0.14288251116323988, 0.05016489540347252]	0.00825	[dist_kullbackleibler=0.0037512316780202726, correl_spearman=0.19451371053704536, dist_bray=0.31034456462336757]	[dist_kullbackleibler, correl_spearman, dist_bray]
12875	13011	Undirected	451	OTU-OTU16->OTU-OTU7		0.46	13012	OTU-OTU16->OTU-OTU7		OTU-OTU16->OTU-OTU7	FALSE		7.9e-05	0.000394	[10.829405391255635]	3	[10.68033337328932]	[dist_kullbackleibler=copresence, dist_bray=copresence, correl_spearman=copresence]	[dist_kullbackleibler=4.995621177381094	correl_spearman	0.458689	[5.278500400030619, 0.6143253581359046, 0.4421626835584733]	[2.154396526581172]	[4.995621177381094, 0.5924205543611283, 0.4586894586894583]	[5.128297057032986, 0.6343875865230502, 0.4582635716931964]	copresence	[4.995621177381094]	[92.0, 92.0, 92.0]	[1.8465954791434704, 0.13127471195430437, 0.1386078779009963]	7.9e-05	[dist_kullbackleibler=3.5165093818623205E-5, dist_bray=0.31628426347659744, correl_spearman=0.10877839033515502]	[dist_kullbackleibler, dist_bray, correl_spearman]
12875	12766	Undirected	452	OTU-OTU16->OTU-OTU42		0.68	13009	OTU-OTU16->OTU-OTU42		OTU-OTU16->OTU-OTU42	FALSE		0	0	[0.007817171488622276]	3	[0.00853276983017986]	[correl_spearman=copresence, dist_kullbackleibler=copresence, dist_bray=copresence]	[correl_spearman=0.6759270571747931	[correl_spearman	0.675927	[0.6775904146460462, 2.776450553635317, 0.4683688424152604]	[0.12953936865688723]	[0.6759270571747931, 2.981235431746606, 0.4934672793396955]	[0.6849592838659597, 2.7164097817414383, 0.47464945627765864]	copresence	[0.6759270571747931]	[96.0, 96.0, 96.0]	[0.09636319381314785, 0.8654034488338315, 0.076459663532834]	0	[correl_spearman=0.01556914104611018, dist_kullbackleibler=5.1269100076467566E-11, dist_bray=0.18321055877806658]	[correl_spearman, dist_kullbackleibler, dist_bray]
12875	12767	Undirected	453	OTU-OTU16->OTU-OTU43		0.62	13008	OTU-OTU16->OTU-OTU43		OTU-OTU16->OTU-OTU43	FALSE		0	0	[0.7145631028160266]	3	[0.7125411328687687]	[dist_bray=copresence, correl_spearman=copresence, dist_kullbackleibler=copresence]	[dist_bray=0.5144925448220323	correl_spearman	0.623474	[0.49309262863353415, 0.6268727877505538, 3.0103572383570456]	[0.057993041285884686]	[0.5144925448220323, 0.6234738825630152, 3.209992471081345]	[0.493617501396201, 0.642337170031794, 2.992027209293654]	copresence	[0.5144925448220323]	[94.0, 94.0, 94.0]	[0.0744357874992719, 0.10550526436793566, 0.7776804035323867]	0	[dist_bray=0.21059921742871235, correl_spearman=0.027067561285022634, dist_kullbackleibler=2.995492742741135E-12]	[dist_bray, correl_spearman, dist_kullbackleibler]
12875	12793	Undirected	455	OTU-OTU16->OTU-OTU52		0.65	12997	OTU-OTU16->OTU-OTU52		OTU-OTU16->OTU-OTU52	FALSE		0	0	[-0.039118233161184957]	3	[-0.0069444308561822645]	[correl_spearman=copresence, dist_kullbackleibler=copresence, dist_bray=copresence]	[correl_spearman=0.6536419785106867	[correl_spearman	0.653642	[0.6408221238202033, 2.6095705184379034, 0.5542346455526189]	[0.16053769668228393]	[0.6536419785106867, 2.7249669268027437, 0.5750212394455247]	[0.6407920639744028, 2.6031370870981387, 0.5663136441043951]	copresence	[0.6536419785106867]	[96.0, 96.0, 96.0]	[0.08880012808425722, 0.5439511835371794, 0.07057064712155188]	0	[correl_spearman=0.014861557205024856, dist_kullbackleibler=2.424727085781342E-13, dist_bray=0.27359926502424503]	[correl_spearman, dist_kullbackleibler, dist_bray]
12875	12791	Undirected	456	OTU-OTU16->OTU-OTU53		0.47	12996	OTU-OTU16->OTU-OTU53		OTU-OTU16->OTU-OTU53	FALSE		0.001288	0.004737	[0.7409559120766231]	3	[0.7361677262302204]	[dist_bray=copresence, correl_spearman=copresence, dist_kullbackleibler=copresence]	[dist_bray=0.59516540360366	correl_spearman	0.466259	[0.5829884562810665, 0.4526377841141653, 4.611965774937585]	[0.05707341912066601]	[0.59516540360366, 0.4662585926144147, 4.78165318476718]	[0.5900512855116624, 0.46648827951740657, 4.584397502190374]	copresence	[0.59516540360366]	[96.0, 96.0, 96.0]	[0.07556917890504447, 0.13075051845750676, 1.1831935674056546]	0.001288	[dist_bray=0.2886881479697374, correl_spearman=0.09639961899325639, dist_kullbackleibler=9.487796531706394E-4]	[dist_bray, correl_spearman, dist_kullbackleibler]
12875	12884	Undirected	457	OTU-OTU16->OTU-OTU55		0.33	12995	OTU-OTU16->OTU-OTU55		OTU-OTU16->OTU-OTU55	FALSE		3.1e-05	0.000164	[11.03778155253641]	3	[11.82510109967807]	[dist_kullbackleibler=mutualExclusion, dist_bray=mutualExclusion, correl_spearman=mutualExclusion]	[dist_kullbackleibler=19.107690560085015	correl_spearman	-0.329659	[18.115742277373137, 0.9374612392722559, -0.3514774620719151]	[3.270187238445829]	[19.107690560085015, 0.9447705669513223, -0.32965870016459975]	[18.55954281247054, 0.9436047053460771, -0.3460369854905354]	mutualExclusion	[19.107690560085015]	[86.0, 86.0, 86.0]	[2.1183203881563446, 0.037627070895795096, 0.12408060975168175]	3.1e-05	[dist_kullbackleibler=7.726063453894483E-6, dist_bray=0.3336756163772526, correl_spearman=0.1691496743297184]	[dist_kullbackleibler, dist_bray, correl_spearman]
12875	12837	Undirected	459	OTU-OTU16->OTU-OTU77		0.67	12974	OTU-OTU16->OTU-OTU77		OTU-OTU16->OTU-OTU77	FALSE		0	0	[0.8197286606523343]	3	[0.8153028251457114]	[dist_bray=copresence, correl_spearman=copresence, dist_kullbackleibler=copresence]	[dist_bray=0.6153130928999757	correl_spearman	0.66957	[0.58400213321138, 0.6545603055803264, 4.150959465501664]	[0.07044078906449042]	[0.6153130928999757, 0.6695698752848995, 4.378225312856034]	[0.58612986286923, 0.6729757733106511, 4.113531280026207]	copresence	[0.6153130928999757]	[52.0, 52.0, 52.0]	[0.12102152261499431, 0.10604074723851001, 1.2351201351383803]	0	[dist_bray=0.2530624706374349, correl_spearman=0.02365134475434727, dist_kullbackleibler=7.740585949989054E-12]	[dist_bray, correl_spearman, dist_kullbackleibler]
12875	12826	Undirected	460	OTU-OTU16->OTU-OTU80		0.74	12966	OTU-OTU16->OTU-OTU80		OTU-OTU16->OTU-OTU80	FALSE		0	0	[-0.004589545379331336]	3	[-0.016570998846478266]	[correl_spearman=copresence, dist_kullbackleibler=copresence, dist_bray=copresence]	[correl_spearman=0.735423271529869	[correl_spearman	0.735423	[0.7282415097727176, 2.4637027454019056, 0.4646954957465231]	[0.14654830721056117]	[0.735423271529869, 2.6118252273294016, 0.4817771348339639]	[0.7381163482433701, 2.467059874020856, 0.4666634028423519]	copresence	[0.735423271529869]	[96.0, 96.0, 96.0]	[0.0718364407236549, 0.5331914890994301, 0.06356996126614387]	0	[correl_spearman=0.0027270775817542225, dist_kullbackleibler=1.6216503695432039E-9, dist_bray=0.17662989043192057]	[correl_spearman, dist_kullbackleibler, dist_bray]
12875	12824	Undirected	461	OTU-OTU16->OTU-OTU85		0.53	12963	OTU-OTU16->OTU-OTU85		OTU-OTU16->OTU-OTU85	FALSE		0.001216	0.004504	[0.7277591387830478]	3	[0.729177504877022]	[dist_bray=copresence, dist_kullbackleibler=copresence, correl_spearman=copresence]	[dist_bray=0.5526552756812818	correl_spearman	0.529781	[0.5408363415505868, 4.838727928137048, 0.5230530228584653]	[0.05014217999731142]	[0.5526552756812818, 5.058690036604269, 0.5297808230365016]	[0.5379636107045426, 4.906081568383616, 0.528662504704986]	copresence	[0.5526552756812818]	[96.0, 96.0, 96.0]	[0.09871078308147406, 1.549521896009104, 0.1297846699687061]	0.001216	[dist_bray=0.2744318272085998, dist_kullbackleibler=0.0011339051340562012, correl_spearman=0.07948363752674203]	[dist_bray, dist_kullbackleibler, correl_spearman]
12875	12822	Undirected	462	OTU-OTU16->OTU-OTU87		0.5	12958	OTU-OTU16->OTU-OTU87		OTU-OTU16->OTU-OTU87	FALSE		0	0	[8.160316558504014]	3	[8.00772925868906]	[dist_kullbackleibler=copresence, correl_spearman=copresence, dist_bray=copresence]	[dist_kullbackleibler=3.3159476771057768	correl_spearman	0.502536	[3.1918313229743487, 0.49921449652937083, 0.6125559048720397]	[1.593815272353286]	[3.3159476771057768, 0.502536103350262, 0.6403229851870161]	[3.170266302719641, 0.5013925799611655, 0.6192078461453172]	copresence	[3.3159476771057768]	[96.0, 96.0, 96.0]	[0.4660586590121377, 0.10956809700953374, 0.06321374932930446]	0	[dist_kullbackleibler=8.670841822322473E-13, correl_spearman=0.06617230971238641, dist_bray=0.3160479830625156]	[dist_kullbackleibler, correl_spearman, dist_bray]
12870	12767	Undirected	466	OTU-OTU76->OTU-OTU43		0.24	13071	OTU-OTU76->OTU-OTU43		OTU-OTU76->OTU-OTU43	FALSE		0.011203	0.033062	[0.7811742712587526]	3	[0.7743520804052008]	[dist_bray=mutualExclusion, correl_spearman=mutualExclusion, dist_kullbackleibler=mutualExclusion]	[dist_bray=0.8734303672274593	correl_spearman	-0.243865	[0.8611401255520683, -0.2499028706648974, 13.339240148022661]	[0.059619387755992376]	[0.8734303672274593, -0.24386520653849736, 13.861624266360607]	[0.8646282590994974, -0.25466231776749837, 13.509978123617326]	mutualExclusion	[0.8734303672274593]	[24.0, 24.0, 24.0]	[0.05359366482272032, 0.14666189849575012, 1.6934608373679503]	0.011203	[dist_bray=0.353871355767178, correl_spearman=0.26389446898797875, dist_kullbackleibler=0.00349592887460215]	[dist_bray, correl_spearman, dist_kullbackleibler]
12868	12875	Undirected	467	OTU-OTU105->OTU-OTU16		0.41	13901	OTU-OTU105->OTU-OTU16		OTU-OTU105->OTU-OTU16	FALSE		0.005411	0.017259	[0.7349309617207611]	3	[0.7266291409803916]	[dist_bray=mutualExclusion, dist_kullbackleibler=mutualExclusion, correl_spearman=mutualExclusion]	[dist_bray=0.8480422170949201	correl_spearman	-0.406535	[0.838489755673901, 11.178578466524367, -0.39183062038646793]	[0.06077233201325821]	[0.8480422170949201, 11.773923488071, -0.4065350585968137]	[0.8441730174041873, 11.146520315086432, -0.38604917404146694]	mutualExclusion	[0.8480422170949201]	[96.0, 96.0, 96.0]	[0.048921281241984124, 1.6644419825607484, 0.14270227226265914]	0.005411	[dist_bray=0.30651918890444707, dist_kullbackleibler=0.003009130627015022, correl_spearman=0.1491883929482667]	[dist_bray, dist_kullbackleibler, correl_spearman]
12868	12770	Undirected	468	OTU-OTU105->OTU-OTU18		0.42	13899	OTU-OTU105->OTU-OTU18		OTU-OTU105->OTU-OTU18	FALSE		0.011404	0.033582	[0.014286039633928082]	3	[0.020553822278185772]	[correl_spearman=mutualExclusion, dist_kullbackleibler=mutualExclusion, dist_bray=mutualExclusion]	[correl_spearman=-0.4210731973854131	[correl_spearman	-0.421073	[-0.41285787346409875, 9.495343482314885, 0.8496659965091766]	[0.14713075584144558]	[-0.4210731973854131, 9.855341134532598, 0.8601317224518641]	[-0.4174952140069039, 9.42474061295346, 0.8535568584802959]	mutualExclusion	[-0.4210731973854131]	[80.0, 80.0, 80.0]	[0.122456560793902, 1.1479120058875767, 0.03864558415984703]	0.011404	[correl_spearman=0.10775818217855004, dist_kullbackleibler=0.012584655864539052, dist_bray=0.2459531342668111]	[correl_spearman, dist_kullbackleibler, dist_bray]
12868	12806	Undirected	469	OTU-OTU105->OTU-OTU22		0.41	13892	OTU-OTU105->OTU-OTU22		OTU-OTU105->OTU-OTU22	FALSE		0.001851	0.00656	[8.205542816735967]	3	[8.032535357391403]	[dist_kullbackleibler=mutualExclusion, correl_spearman=mutualExclusion, dist_bray=mutualExclusion]	[dist_kullbackleibler=11.918415632312039	correl_spearman	-0.406242	[11.512081102786395, -0.4345435529142468, 0.8666395582870334]	[1.4444364515664698]	[11.918415632312039, -0.4062417472215293, 0.8773621515760801]	[11.489192546356486, -0.4379153922631855, 0.8647347936662786]	mutualExclusion	[11.918415632312039]	[6.0, 6.0, 6.0]	[1.4054493759031887, 0.1255598517913372, 0.02984609037612652]	0.001851	[dist_kullbackleibler=0.0016674899551160083, correl_spearman=0.11642147437882011, dist_bray=0.20525214942573178]	[dist_kullbackleibler, correl_spearman, dist_bray]
12868	12844	Undirected	470	OTU-OTU105->OTU-OTU29		0.49	13890	OTU-OTU105->OTU-OTU29		OTU-OTU105->OTU-OTU29	FALSE		0.003938	0.013009	[7.831306425551528]	3	[7.774120630199138]	[dist_kullbackleibler=mutualExclusion, correl_spearman=mutualExclusion, dist_bray=mutualExclusion]	[dist_kullbackleibler=11.852941304423316	correl_spearman	-0.489062	[11.154096445596416, -0.463920184941091, 0.8514162896976174]	[1.673295786900641]	[11.852941304423316, -0.4890622327235234, 0.8685843584931494]	[11.21294434312616, -0.46079535614495426, 0.8577003792682165]	mutualExclusion	[11.852941304423316]	[88.0, 88.0, 88.0]	[1.5770784105511133, 0.14030201197329126, 0.049861441503653355]	0.003938	[dist_kullbackleibler=0.0035570662187366375, correl_spearman=0.09036222048244424, dist_bray=0.29547165190806157]	[dist_kullbackleibler, correl_spearman, dist_bray]
12868	12917	Undirected	471	OTU-OTU105->OTU-OTU30		0.44	13885	OTU-OTU105->OTU-OTU30		OTU-OTU105->OTU-OTU30	FALSE		0.000239	0.001062	[-0.0030935311092584695]	3	[-0.006749552659996092]	[correl_spearman=copresence, dist_bray=copresence, dist_kullbackleibler=copresence]	[correl_spearman=0.4351899731443931	[correl_spearman	0.43519	[0.4120372297243926, 0.5792344901295655, 3.5714153155489834]	[0.152747834339542]	[0.4351899731443931, 0.6068378680348564, 3.685906624746623]	[0.43169741232103903, 0.5859354534783173, 3.3869653679625147]	copresence	[0.4351899731443931]	[100.0, 100.0, 100.0]	[0.15264410834253633, 0.07779886055850137, 0.8791922814472257]	0.000239	[correl_spearman=0.14188321125280978, dist_bray=0.2848306420706912, dist_kullbackleibler=1.0041146268457979E-4]	[correl_spearman, dist_bray, dist_kullbackleibler]
12868	12833	Undirected	472	OTU-OTU105->OTU-OTU36		0.56	13884	OTU-OTU105->OTU-OTU36		OTU-OTU105->OTU-OTU36	FALSE		0.000497	0.002002	[0.009924168030343447]	3	[0.008050115834846031]	[correl_spearman=mutualExclusion, dist_bray=mutualExclusion, dist_kullbackleibler=mutualExclusion]	[correl_spearman=-0.555489644435968	[correl_spearman	-0.55549	[-0.5414154158962575, 0.7565309717041285, 8.510796029325626]	[0.11940202768739472]	[-0.555489644435968, 0.761135313697914, 8.723500093046914]	[-0.5563831909906548, 0.755982329396013, 8.558794915564553]	mutualExclusion	[-0.555489644435968]	[100.0, 100.0, 100.0]	[0.13018702700386686, 0.05116573607344089, 1.4116987245750023]	0.000497	[correl_spearman=0.06389835047660708, dist_bray=0.2730930025994144, dist_kullbackleibler=5.208286943623186E-4]	[correl_spearman, dist_bray, dist_kullbackleibler]
12868	13042	Undirected	473	OTU-OTU105->OTU-OTU39		0.49	13883	OTU-OTU105->OTU-OTU39		OTU-OTU105->OTU-OTU39	FALSE		0.00045	0.001852	[-0.004085802018267597]	3	[-0.01834722806299809]	[correl_spearman=copresence, dist_kullbackleibler=copresence, dist_bray=copresence]	[correl_spearman=0.4937230438848521	[correl_spearman	0.493723	[0.47376443360790416, 1.9037919920873327, 0.4138241609363]	[0.15379730334974503]	[0.4937230438848521, 1.9151637496495661, 0.4202717333973125]	[0.4895354400097365, 1.7863300305380836, 0.40309372658089127]	copresence	[0.4937230438848521]	[100.0, 100.0, 100.0]	[0.11627109685174272, 0.4916782669156203, 0.07238181527190203]	0.00045	[correl_spearman=0.07448148402587906, dist_kullbackleibler=4.301493762847164E-4, dist_bray=0.25424272277086657]	[correl_spearman, dist_kullbackleibler, dist_bray]
12868	13000	Undirected	474	OTU-OTU105->OTU-OTU88		0.38	13853	OTU-OTU105->OTU-OTU88		OTU-OTU105->OTU-OTU88	FALSE		0.004131	0.013584	[6.090919934194976]	3	[6.137145467518037]	[dist_kullbackleibler=copresence, correl_spearman=copresence, dist_bray=copresence]	[dist_kullbackleibler=3.3473979478017157	correl_spearman	0.381965	[3.447307226844411, 0.36893877216358334, 0.4882682763894826]	[1.2885730846174794]	[3.3473979478017157, 0.3819646068422306, 0.4942708045609696]	[3.3745655841602913, 0.3843217638403606, 0.4950618125361609]	copresence	[3.3473979478017157]	[100.0, 100.0, 100.0]	[0.9027144423329773, 0.14348703103276556, 0.060936844271059894]	0.004131	[dist_kullbackleibler=0.0023196112885571774, correl_spearman=0.16571760901511856, dist_bray=0.2611859290569811]	[dist_kullbackleibler, correl_spearman, dist_bray]
12868	12865	Undirected	475	OTU-OTU105->OTU-OTU107		0.4	13692	OTU-OTU105->OTU-OTU107		OTU-OTU105->OTU-OTU107	FALSE		0.006618	0.020751	[0.7498892709290277]	3	[0.7433582635832897]	[dist_bray=mutualExclusion, correl_spearman=mutualExclusion, dist_kullbackleibler=mutualExclusion]	[dist_bray=0.8484949965891024	correl_spearman	-0.401197	[0.8346735097049169, -0.3977305463720005, 11.682450515877141]	[0.06216700859425547]	[0.8484949965891024, -0.40119663619616003, 12.184848944453588]	[0.8340982129075141, -0.40688668511208054, 11.689228163878926]	mutualExclusion	[0.8484949965891024]	[34.0, 34.0, 34.0]	[0.058260305451919514, 0.14115933278050666, 1.4700519275284127]	0.006618	[dist_bray=0.35259721668053323, correl_spearman=0.13416143948022152, dist_kullbackleibler=0.00368654622172615]	[dist_bray, correl_spearman, dist_kullbackleibler]
12865	12804	Undirected	476	OTU-OTU107->OTU-OTU100		0.62	13432	OTU-OTU107->OTU-OTU100		OTU-OTU107->OTU-OTU100	FALSE		0	0	[0.0024269072406636347]	3	[1.7186098682032914E-4]	[correl_spearman=copresence, dist_kullbackleibler=copresence, dist_bray=copresence]	[correl_spearman=0.6233016877651077	[correl_spearman	0.623302	[0.6222404189272113, 2.514202918400486, 0.38135250845067964]	[0.16424884520040325]	[0.6233016877651077, 2.6587232013638173, 0.3642128990662855]	[0.6284292196831798, 2.632087572309543, 0.37605278017479504]	copresence	[0.6233016877651077]	[34.0, 34.0, 34.0]	[0.08844121145988593, 0.7516197089616166, 0.08469483999567468]	0	[correl_spearman=0.018230198689844768, dist_kullbackleibler=1.9984014443252818E-15, dist_bray=0.09513203339923948]	[correl_spearman, dist_kullbackleibler, dist_bray]
12865	12787	Undirected	477	OTU-OTU107->OTU-OTU110		0.68	13414	OTU-OTU107->OTU-OTU110		OTU-OTU107->OTU-OTU110	FALSE		0	0	[8.435970465031009]	3	[8.333970786026695]	[dist_kullbackleibler=mutualExclusion, correl_spearman=mutualExclusion, dist_bray=mutualExclusion]	[dist_kullbackleibler=13.749514314166799	correl_spearman	-0.679049	[13.343481521188306, -0.6702791478215255, 0.9143504226860905]	[1.3417537464152611]	[13.749514314166799, -0.679049059091631, 0.9299228553978575]	[13.331498887733217, -0.6682502620925946, 0.915966004115254]	mutualExclusion	[13.749514314166799]	[34.0, 34.0, 34.0]	[0.9512302222115911, 0.0668982355259939, 0.02765166290683425]	0	[dist_kullbackleibler=1.400815327068372E-7, correl_spearman=0.004478417894113296, dist_bray=0.15158007105061388]	[dist_kullbackleibler, correl_spearman, dist_bray]
12865	12777	Undirected	478	OTU-OTU107->OTU-OTU13		0.51	13122	OTU-OTU107->OTU-OTU13		OTU-OTU107->OTU-OTU13	FALSE		0.000144	0.000671	[0.738799171550268]	3	[0.7378499605484898]	[dist_bray=mutualExclusion, dist_kullbackleibler=mutualExclusion, correl_spearman=mutualExclusion]	[dist_bray=0.8969966243419328	correl_spearman	-0.508173	[0.8778930746348714, 12.39817396177536, -0.5049839058449713]	[0.06570954601004529]	[0.8969966243419328, 12.777589968828345, -0.5081734608885674]	[0.8763955860017143, 12.51828281755049, -0.4996898556498321]	mutualExclusion	[0.8969966243419328]	[34.0, 34.0, 34.0]	[0.033627773859750604, 1.192978620318773, 0.09023582725740278]	0.000144	[dist_bray=0.222528308501442, dist_kullbackleibler=2.3642660726419518E-4, correl_spearman=0.04425252670671442]	[dist_bray, dist_kullbackleibler, correl_spearman]
12865	12770	Undirected	481	OTU-OTU107->OTU-OTU18		0.6	13118	OTU-OTU107->OTU-OTU18		OTU-OTU107->OTU-OTU18	FALSE		0	2e-06	[0.7771655436799858]	3	[0.7717188059354418]	[dist_bray=copresence, dist_kullbackleibler=copresence, correl_spearman=copresence]	[dist_bray=0.5298701793083026	correl_spearman	0.599945	[0.5170632103932169, 4.607466198734459, 0.5864142702144632]	[0.08355430943648487]	[0.5298701793083026, 5.032783213077415, 0.5999447464889827]	[0.5011004721411092, 4.512655737353409, 0.5997628785544643]	copresence	[0.5298701793083026]	[30.0, 30.0, 30.0]	[0.08237023646465172, 1.7640701124785665, 0.11736388427392297]	0	[dist_bray=0.18746003039340942, dist_kullbackleibler=3.30162214678964E-7, correl_spearman=0.04235072663871847]	[dist_bray, dist_kullbackleibler, correl_spearman]
12865	12808	Undirected	482	OTU-OTU107->OTU-OTU21		0.65	13103	OTU-OTU107->OTU-OTU21		OTU-OTU107->OTU-OTU21	FALSE		0	0	[0.7749589498781315]	3	[0.775982359817096]	[dist_bray=copresence, dist_kullbackleibler=copresence, correl_spearman=copresence]	[dist_bray=0.5215575630855063	correl_spearman	0.646751	[0.509814330465307, 3.4884253199452795, 0.6348438250455871]	[0.07742072710376285]	[0.5215575630855063, 3.7078429022403876, 0.6467512121178867]	[0.5074702881214279, 3.3833612183799957, 0.6343866649920169]	copresence	[0.5215575630855063]	[28.0, 28.0, 28.0]	[0.06947741448730885, 1.1131982025145972, 0.09311942950060834]	0	[dist_bray=0.1562962850675349, dist_kullbackleibler=7.51620987671231E-14, correl_spearman=0.01612310635955949]	[dist_bray, dist_kullbackleibler, correl_spearman]
12865	12847	Undirected	484	OTU-OTU107->OTU-OTU27		0.43	13099	OTU-OTU107->OTU-OTU27		OTU-OTU107->OTU-OTU27	FALSE		0	1e-06	[0.7745294073338223]	3	[0.7620688137244146]	[dist_bray=copresence, dist_kullbackleibler=copresence, correl_spearman=copresence]	[dist_bray=0.549998319027095	correl_spearman	0.43447	[0.5294904873410592, 5.005960784804948, 0.4156607485458425]	[0.0745006690842218]	[0.549998319027095, 5.117179782206492, 0.43446953637441194]	[0.5276936413994848, 4.862073015368692, 0.42884771113563996]	copresence	[0.549998319027095]	[34.0, 34.0, 34.0]	[0.08165712979729839, 1.2121904460767439, 0.12461240793799734]	0	[dist_bray=0.20785050982731246, dist_kullbackleibler=6.879792513458938E-8, correl_spearman=0.10972519334707159]	[dist_bray, dist_kullbackleibler, correl_spearman]
12865	12833	Undirected	486	OTU-OTU107->OTU-OTU36		0.66	13083	OTU-OTU107->OTU-OTU36		OTU-OTU107->OTU-OTU36	FALSE		0	0	[-0.015028365974735832]	3	[0.0058496125465471735]	[correl_spearman=copresence, dist_bray=copresence, dist_kullbackleibler=copresence]	[correl_spearman=0.6631087577233439	[correl_spearman	0.663109	[0.6713633394659212, 0.42940495911503507, 2.59389629002528]	[0.14803319493241293]	[0.6631087577233439, 0.45164155229207437, 2.90997858424435]	[0.6668059925557808, 0.4267043543229426, 2.5792690291668494]	copresence	[0.6631087577233439]	[34.0, 34.0, 34.0]	[0.08139490693594942, 0.07687779458276348, 0.6431449717933263]	0	[correl_spearman=0.009832016815278455, dist_bray=0.14447365001076595, dist_kullbackleibler=5.0959236830294685E-14]	[correl_spearman, dist_bray, dist_kullbackleibler]
12865	12830	Undirected	487	OTU-OTU107->OTU-OTU38		0.6	13082	OTU-OTU107->OTU-OTU38		OTU-OTU107->OTU-OTU38	FALSE		0	4e-06	[0.6968013216990419]	3	[0.6978173129073874]	[dist_bray=copresence, correl_spearman=copresence, dist_kullbackleibler=copresence]	[dist_bray=0.48539449884866837	correl_spearman	0.600739	[0.46823854032596507, 0.606635968651689, 3.2039603494118003]	[0.05651362268970094]	[0.48539449884866837, 0.600738504093702, 3.5891345060745103]	[0.47584132515274624, 0.6114547200675302, 3.0895200707968415]	copresence	[0.48539449884866837]	[34.0, 34.0, 34.0]	[0.06511665974491718, 0.08337538187888789, 0.5999348355709403]	0	[dist_bray=0.18414660480840372, correl_spearman=0.019151100792823006, dist_kullbackleibler=1.5070135883643587E-6]	[dist_bray, correl_spearman, dist_kullbackleibler]
12865	12766	Undirected	488	OTU-OTU107->OTU-OTU42		0.56	13075	OTU-OTU107->OTU-OTU42		OTU-OTU107->OTU-OTU42	FALSE		0	1e-06	[-0.00253476978469313]	3	[-0.012827373277800954]	[correl_spearman=copresence, dist_bray=copresence, dist_kullbackleibler=copresence]	[correl_spearman=0.558620115528754	[correl_spearman	0.55862	[0.5511446525121512, 0.47576165467128423, 3.8337424643777456]	[0.14935908897419756]	[0.558620115528754, 0.4971833209568097, 4.275442866944062]	[0.5576595358719139, 0.47017332121922983, 3.733209332402174]	copresence	[0.558620115528754]	[34.0, 34.0, 34.0]	[0.11815207936184827, 0.07748222280713829, 1.1003860779665622]	0	[correl_spearman=0.05042683185368613, dist_bray=0.1790657631865049, dist_kullbackleibler=1.3165298207162834E-7]	[correl_spearman, dist_bray, dist_kullbackleibler]
12865	12767	Undirected	489	OTU-OTU107->OTU-OTU43		0.56	13074	OTU-OTU107->OTU-OTU43		OTU-OTU107->OTU-OTU43	FALSE		0	0	[0.7323947378202509]	3	[0.7298219837950992]	[dist_bray=copresence, correl_spearman=copresence, dist_kullbackleibler=copresence]	[dist_bray=0.582399765376463	correl_spearman	0.558236	[0.5569362433122036, 0.5449861272464451, 4.172925313666672]	[0.06089774047795017]	[0.582399765376463, 0.5582359099327134, 4.437925007541201]	[0.5598121152073865, 0.549163383600038, 4.095548908273112]	copresence	[0.582399765376463]	[34.0, 34.0, 34.0]	[0.06958363683547175, 0.10976623665168381, 0.99420196278592]	0	[dist_bray=0.2561055261997399, correl_spearman=0.0474628301058983, dist_kullbackleibler=5.817014425701927E-9]	[dist_bray, correl_spearman, dist_kullbackleibler]
12865	12810	Undirected	490	OTU-OTU107->OTU-OTU45		0.5	13070	OTU-OTU107->OTU-OTU45		OTU-OTU107->OTU-OTU45	FALSE		5e-06	2.9e-05	[0.021714109809339226]	3	[0.0037590860423050696]	[correl_spearman=copresence, dist_kullbackleibler=copresence, dist_bray=copresence]	[correl_spearman=0.49557988273085435	[correl_spearman	0.49558	[0.4844386880533133, 4.864183125189756, 0.6183069122349061]	[0.14068861139947117]	[0.49557988273085435, 5.462050882052784, 0.6507436520265343]	[0.5000677033788898, 4.784018134013164, 0.6227522790401212]	copresence	[0.49557988273085435]	[34.0, 34.0, 34.0]	[0.13646337533306124, 1.3668238742391736, 0.08410012894606349]	5e-06	[correl_spearman=0.09659316545925173, dist_kullbackleibler=1.940254679810849E-6, dist_bray=0.31739876972168457]	[correl_spearman, dist_kullbackleibler, dist_bray]
12865	12793	Undirected	491	OTU-OTU107->OTU-OTU52		0.49	13059	OTU-OTU107->OTU-OTU52		OTU-OTU107->OTU-OTU52	FALSE		0	0	[8.837664783791503]	3	[8.79023771683722]	[dist_kullbackleibler=copresence, correl_spearman=copresence, dist_bray=copresence]	[dist_kullbackleibler=4.023113701557114	correl_spearman	0.486839	[3.7872837965485013, 0.47222016800639277, 0.5563159252076619]	[1.618284169834781]	[4.023113701557114, 0.4868385354232965, 0.5672478833219672]	[3.7573311328889423, 0.4775170709224125, 0.561296635376208]	copresence	[4.023113701557114]	[34.0, 34.0, 34.0]	[0.7666573751396928, 0.11309629663396153, 0.06532556921040165]	0	[dist_kullbackleibler=5.52369616713122E-9, correl_spearman=0.08396921123854995, dist_bray=0.26348418633235626]	[dist_kullbackleibler, correl_spearman, dist_bray]
12865	12837	Undirected	492	OTU-OTU107->OTU-OTU77		0.61	13030	OTU-OTU107->OTU-OTU77		OTU-OTU107->OTU-OTU77	FALSE		0	0	[0.835434965337318]	3	[0.8178861288926028]	[dist_bray=copresence, dist_kullbackleibler=copresence, correl_spearman=copresence]	[dist_bray=0.5341766291584171	correl_spearman	0.608576	[0.5191806696159039, 4.234938639581448, 0.5999142635096866]	[0.07752397728892194]	[0.5341766291584171, 4.421347136284691, 0.6085762140747848]	[0.49787964612871183, 3.8386871653698025, 0.6162660727337362]	copresence	[0.5341766291584171]	[18.0, 18.0, 18.0]	[0.10936167644635926, 1.5223854503520817, 0.11177415443567672]	0	[dist_bray=0.18319517299680177, dist_kullbackleibler=2.5617952204015637E-11, correl_spearman=0.027469712220377474]	[dist_bray, dist_kullbackleibler, correl_spearman]
12865	12826	Undirected	493	OTU-OTU107->OTU-OTU80		0.63	13021	OTU-OTU107->OTU-OTU80		OTU-OTU107->OTU-OTU80	FALSE		0	0	[-0.014571964529087543]	3	[-0.01621296441188467]	[correl_spearman=copresence, dist_bray=copresence, dist_kullbackleibler=copresence]	[correl_spearman=0.6328702533393652	[correl_spearman	0.63287	[0.6109358417251501, 0.5379521213768501, 3.3632387019915253]	[0.1509921470501784]	[0.6328702533393652, 0.560426801772573, 3.643106933961235]	[0.6130302080600677, 0.5394327880802628, 3.3788026020400665]	copresence	[0.6328702533393652]	[34.0, 34.0, 34.0]	[0.09305616327757776, 0.05627007066694622, 0.6030901575023588]	0	[correl_spearman=0.01989698125849293, dist_bray=0.23613230365972937, dist_kullbackleibler=9.052136595855131E-9]	[correl_spearman, dist_bray, dist_kullbackleibler]
12865	12824	Undirected	494	OTU-OTU107->OTU-OTU85		0.43	13020	OTU-OTU107->OTU-OTU85		OTU-OTU107->OTU-OTU85	FALSE		0.000325	0.001386	[8.803809091286832]	3	[9.115417172237567]	[dist_kullbackleibler=copresence, dist_bray=copresence, correl_spearman=copresence]	[dist_kullbackleibler=5.6045240543285475	correl_spearman	0.428976	[5.070558243204058, 0.5809751117267339, 0.4413994538574447]	[1.7897732092634338]	[5.6045240543285475, 0.6088197736439893, 0.428975506008941]	[5.23004636377391, 0.5851794327046838, 0.4367942434310341]	copresence	[5.6045240543285475]	[34.0, 34.0, 34.0]	[1.2905367497008409, 0.06432790033847653, 0.12412359221776662]	0.000325	[dist_kullbackleibler=1.8503304580352875E-4, dist_bray=0.2843786059475262, correl_spearman=0.10781942531918065]	[dist_kullbackleibler, dist_bray, correl_spearman]
12862	12767	Undirected	498	OTU-OTU112->OTU-OTU43		0.56	13871	OTU-OTU112->OTU-OTU43		OTU-OTU112->OTU-OTU43	FALSE		8e-06	4.6e-05	[0.004710046790734125]	3	[0.008762062226908753]	[correl_spearman=copresence, dist_kullbackleibler=copresence, dist_bray=copresence]	[correl_spearman=0.5579858351358749	[correl_spearman	0.557986	[0.5553965623139003, 3.485976988222504, 0.5243752663315716]	[0.14726398558818593]	[0.5579858351358749, 3.6147649134555535, 0.5244672690538913]	[0.552362669492603, 3.4630140803595477, 0.5255792786080554]	copresence	[0.5579858351358749]	[98.0, 98.0, 98.0]	[0.10413617079238134, 1.2011999789306906, 0.06678398979418243]	8e-06	[correl_spearman=0.04513900493816159, dist_kullbackleibler=8.735206881382851E-6, dist_bray=0.25057102435888456]	[correl_spearman, dist_kullbackleibler, dist_bray]
12862	12886	Undirected	499	OTU-OTU112->OTU-OTU54		0.51	13864	OTU-OTU112->OTU-OTU54		OTU-OTU112->OTU-OTU54	FALSE		0.000489	0.001974	[5.3567431284904]	3	[5.329371962042051]	[dist_kullbackleibler=mutualExclusion, dist_bray=mutualExclusion, correl_spearman=mutualExclusion]	[dist_kullbackleibler=8.916234398258212	correl_spearman	-0.509539	[8.73430137080981, 0.7806682812226636, -0.49419345790865365]	[1.0548504031887145]	[8.916234398258212, 0.7852126115340243, -0.5095390004686209]	[8.86337245435195, 0.783130703353663, -0.505504061019864]	mutualExclusion	[8.916234398258212]	[100.0, 100.0, 100.0]	[1.0072921817571736, 0.04647009680827703, 0.11971150726989246]	0.000489	[dist_kullbackleibler=3.46185754906303E-4, dist_bray=0.3046574720457591, correl_spearman=0.08462754949745366]	[dist_kullbackleibler, dist_bray, correl_spearman]
12862	12773	Undirected	500	OTU-OTU112->OTU-OTU65		0.5	13861	OTU-OTU112->OTU-OTU65		OTU-OTU112->OTU-OTU65	FALSE		0	1e-06	[0.7969969263446428]	3	[0.7818622541532249]	[dist_bray=copresence, correl_spearman=copresence, dist_kullbackleibler=copresence]	[dist_bray=0.6188702302717967	correl_spearman	0.498333	[0.6183347970573777, 0.47955142048705224, 4.516711142430064]	[0.08260682918600179]	[0.6188702302717967, 0.49833283119870214, 4.463213225495276]	[0.6208114059355461, 0.4815468537514729, 4.380685650026649]	copresence	[0.6188702302717967]	[44.0, 44.0, 44.0]	[0.08175044703846454, 0.12343535322685896, 1.2064854831737601]	0	[dist_bray=0.2836834781151927, correl_spearman=0.09101968752780909, dist_kullbackleibler=2.762251272159233E-8]	[dist_bray, correl_spearman, dist_kullbackleibler]
12862	12822	Undirected	501	OTU-OTU112->OTU-OTU87		0.56	13841	OTU-OTU112->OTU-OTU87		OTU-OTU112->OTU-OTU87	FALSE		1e-06	5e-06	[0.7113800738479541]	3	[0.7041864844623789]	[dist_bray=copresence, correl_spearman=copresence, dist_kullbackleibler=copresence]	[dist_bray=0.5629250167569331	correl_spearman	0.560819	[0.5551945918854552, 0.5753702567297785, 2.9471309191246515]	[0.05440924059219027]	[0.5629250167569331, 0.5608187500807134, 3.0670437282763454]	[0.5640851657299026, 0.5738322845519598, 2.9790466108604194]	copresence	[0.5629250167569331]	[100.0, 100.0, 100.0]	[0.08615790444637, 0.12660602961488526, 0.7536192937704853]	1e-06	[dist_bray=0.3058696262880831, correl_spearman=0.05084562867037129, dist_kullbackleibler=4.646330061808257E-7]	[dist_bray, correl_spearman, dist_kullbackleibler]
12862	12798	Undirected	502	OTU-OTU112->OTU-OTU98		0.44	13826	OTU-OTU112->OTU-OTU98		OTU-OTU112->OTU-OTU98	FALSE		1e-06	7e-06	[-0.03697400112453851]	3	[-0.017435640606628756]	[correl_spearman=mutualExclusion, dist_kullbackleibler=mutualExclusion, dist_bray=mutualExclusion]	[correl_spearman=-0.4398777156686509	[correl_spearman	-0.439878	[-0.44165409985003623, 20.467802980946605, 0.9645692724807768]	[0.15926111901025755]	[-0.4398777156686509, 21.411947929853348, 0.9698702502753946]	[-0.43511984434201806, 21.046714632138357, 0.9704932681660013]	mutualExclusion	[-0.4398777156686509]	[86.0, 86.0, 86.0]	[0.1268542797163113, 1.9642612362166096, 0.022421981466515667]	1e-06	[correl_spearman=0.11681320667522777, dist_kullbackleibler=3.1173528647343574E-7, dist_bray=0.30833165584766065]	[correl_spearman, dist_kullbackleibler, dist_bray]
12861	12782	Undirected	503	OTU-OTU4->OTU-OTU10		0.6	13754	OTU-OTU4->OTU-OTU10		OTU-OTU4->OTU-OTU10	FALSE		0	0	[0.7327277813000688]	3	[0.7281008890268196]	[dist_bray=copresence, dist_kullbackleibler=copresence, correl_spearman=copresence]	[dist_bray=0.3884275238800309	correl_spearman	0.59826	[0.3895492807348508, 2.4700480139981256, 0.5883362303498754]	[0.06726874173843549]	[0.3884275238800309, 2.564962324097892, 0.5982599172333614]	[0.37193306904395296, 2.351530808849805, 0.60376556588492]	copresence	[0.3884275238800309]	[86.0, 86.0, 86.0]	[0.10302920097034031, 0.8230851859201754, 0.12027376175658284]	0	[dist_bray=0.14577251566449156, dist_kullbackleibler=2.1895818491657337E-11, correl_spearman=0.0404582897211323]	[dist_bray, dist_kullbackleibler, correl_spearman]
12861	12777	Undirected	504	OTU-OTU4->OTU-OTU13		0.42	13751	OTU-OTU4->OTU-OTU13		OTU-OTU4->OTU-OTU13	FALSE		0.001763	0.006268	[-0.030545162102779733]	3	[-0.012712099636861197]	[correl_spearman=mutualExclusion, dist_kullbackleibler=mutualExclusion, dist_bray=mutualExclusion]	[correl_spearman=-0.4178046955449784	[correl_spearman	-0.417805	[-0.40481649767740985, 10.3117763391648, 0.7908580373568853]	[0.16772254062657496]	[-0.4178046955449784, 10.779169687281646, 0.8006783783169507]	[-0.41836245136981004, 10.474128128082778, 0.7938371516238816]	mutualExclusion	[-0.4178046955449784]	[100.0, 100.0, 100.0]	[0.1266719099533162, 1.5075853357515567, 0.053549288920841986]	0.001763	[correl_spearman=0.13529704876651438, dist_kullbackleibler=8.813370961661127E-4, dist_bray=0.31616806615858506]	[correl_spearman, dist_kullbackleibler, dist_bray]
12861	12808	Undirected	509	OTU-OTU4->OTU-OTU21		0.58	13735	OTU-OTU4->OTU-OTU21		OTU-OTU4->OTU-OTU21	FALSE		0	3e-06	[0.7619350919766132]	3	[0.7500927471163437]	[dist_bray=copresence, correl_spearman=copresence, dist_kullbackleibler=copresence]	[dist_bray=0.578395344240318	correl_spearman	0.575078	[0.5597900947471846, 0.5660369960682619, 3.758077346708996]	[0.06940106397251043]	[0.578395344240318, 0.5750784539339082, 3.999994094035229]	[0.5527898417267131, 0.561957322941862, 3.6549596318137887]	copresence	[0.578395344240318]	[72.0, 72.0, 72.0]	[0.08247845822628184, 0.11746774776785734, 1.3468261526574292]	0	[dist_bray=0.25378207507502626, correl_spearman=0.048255810020860934, dist_kullbackleibler=4.125996111437047E-7]	[dist_bray, correl_spearman, dist_kullbackleibler]
12861	12806	Undirected	510	OTU-OTU4->OTU-OTU22		0.64	13734	OTU-OTU4->OTU-OTU22		OTU-OTU4->OTU-OTU22	FALSE		0	0	[0.02908484665316871]	3	[0.025588833506587333]	[correl_spearman=copresence, dist_kullbackleibler=copresence, dist_bray=copresence]	[correl_spearman=0.639283471549598	[correl_spearman	0.639283	[0.6179009330352335, 2.9985429469436413, 0.5266986365136774]	[0.13352033773804114]	[0.639283471549598, 3.2490352793145396, 0.5317062386314435]	[0.6276458591462848, 2.869799498296819, 0.5263263024109797]	copresence	[0.639283471549598]	[6.0, 6.0, 6.0]	[0.10086822184739537, 0.9165018004819182, 0.08274971951127881]	0	[correl_spearman=0.031092331645268145, dist_kullbackleibler=8.189893208054855E-12, dist_bray=0.21789336058558417]	[correl_spearman, dist_kullbackleibler, dist_bray]
12861	12847	Undirected	511	OTU-OTU4->OTU-OTU27		0.48	13732	OTU-OTU4->OTU-OTU27		OTU-OTU4->OTU-OTU27	FALSE		0.000118	0.000561	[0.0024690187287076675]	3	[0.008603158592474718]	[correl_spearman=copresence, dist_bray=copresence, dist_kullbackleibler=copresence]	[correl_spearman=0.4822816583408977	[correl_spearman	0.482282	[0.47975359190972405, 0.6291624336064573, 4.219133787122073]	[0.1478868389207071]	[0.4822816583408977, 0.6529870794699786, 4.431312668107765]	[0.5070879851365432, 0.6414528331726093, 4.1765129728405945]	copresence	[0.4822816583408977]	[92.0, 92.0, 92.0]	[0.12270048755535488, 0.08456657213685717, 1.28323084034765]	0.000118	[correl_spearman=0.08930553334523011, dist_bray=0.36956863371757487, dist_kullbackleibler=5.665457762615844E-5]	[correl_spearman, dist_bray, dist_kullbackleibler]
12861	12833	Undirected	513	OTU-OTU4->OTU-OTU36		0.54	13718	OTU-OTU4->OTU-OTU36		OTU-OTU4->OTU-OTU36	FALSE		0	0	[0.674044130292168]	3	[0.6643979389871497]	[dist_bray=copresence, correl_spearman=copresence, dist_kullbackleibler=copresence]	[dist_bray=0.5465997756019056	correl_spearman	0.540118	[0.5327887032884998, 0.5243906355008643, 2.389574350815412]	[0.060356093591820995]	[0.5465997756019056, 0.5401181490087181, 2.4376064681077256]	[0.5410389539906222, 0.5289819726826107, 2.328282116230593]	copresence	[0.5465997756019056]	[100.0, 100.0, 100.0]	[0.06511708739370245, 0.11596115428332573, 0.3762581262763443]	0	[dist_bray=0.303014660506458, correl_spearman=0.0573826758998468, dist_kullbackleibler=8.581479971070394E-11]	[dist_bray, correl_spearman, dist_kullbackleibler]
12861	12830	Undirected	514	OTU-OTU4->OTU-OTU38		0.52	13717	OTU-OTU4->OTU-OTU38		OTU-OTU4->OTU-OTU38	FALSE		1.7e-05	9.4e-05	[0.6292860863444384]	3	[0.6255227705335384]	[dist_bray=copresence, correl_spearman=copresence, dist_kullbackleibler=copresence]	[dist_bray=0.4808519190187678	correl_spearman	0.523703	[0.47688864586928387, 0.5154458000781696, 2.1253519680673345]	[0.050614722482742076]	[0.4808519190187678, 0.5237034007094435, 2.1646481755140425]	[0.47976661902755785, 0.5228730747228705, 2.097785363824655]	copresence	[0.4808519190187678]	[100.0, 100.0, 100.0]	[0.05605414922400535, 0.10832119930758514, 0.3708478469769919]	1.7e-05	[dist_bray=0.2650706388552737, correl_spearman=0.05041425243270847, dist_kullbackleibler=1.730985298720178E-5]	[dist_bray, correl_spearman, dist_kullbackleibler]
12861	12817	Undirected	515	OTU-OTU4->OTU-OTU40		0.57	13703	OTU-OTU4->OTU-OTU40		OTU-OTU4->OTU-OTU40	FALSE		1e-06	6e-06	[-0.004030138477363981]	3	[-0.02183260351137313]	[correl_spearman=mutualExclusion, dist_kullbackleibler=mutualExclusion, dist_bray=mutualExclusion]	[correl_spearman=-0.5685182012068123	[correl_spearman	-0.568518	[-0.5681195197495923, 16.598311695508173, 0.9432580288741822]	[0.1421605011378327]	[-0.5685182012068123, 16.921542679617104, 0.9494735154890691]	[-0.5924946315706927, 16.83340656440185, 0.9465805759230912]	mutualExclusion	[-0.5685182012068123]	[100.0, 100.0, 100.0]	[0.13134662499716113, 1.9313824287492376, 0.01945283561739893]	1e-06	[correl_spearman=0.06586171319339262, dist_kullbackleibler=1.1672609675494883E-6, dist_bray=0.13334684049498868]	[correl_spearman, dist_kullbackleibler, dist_bray]
12861	12766	Undirected	516	OTU-OTU4->OTU-OTU42		0.54	13702	OTU-OTU4->OTU-OTU42		OTU-OTU4->OTU-OTU42	FALSE		0	1e-06	[0.00390325928118818]	3	[-0.004189498295141972]	[correl_spearman=copresence, dist_bray=copresence, dist_kullbackleibler=copresence]	[correl_spearman=0.5441877384165948	[correl_spearman	0.544188	[0.5444079360813983, 0.5490082640203744, 2.6700621571413263]	[0.13301717600802782]	[0.5441877384165948, 0.5625152862943589, 2.793776855280308]	[0.5663149686646368, 0.5544979095078276, 2.6283522268996915]	copresence	[0.5441877384165948]	[100.0, 100.0, 100.0]	[0.13477175776650827, 0.0703667472889387, 0.6667829519019339]	0	[correl_spearman=0.06754118348844834, dist_bray=0.3249926901458279, dist_kullbackleibler=9.090365127306654E-8]	[correl_spearman, dist_bray, dist_kullbackleibler]
12861	12767	Undirected	517	OTU-OTU4->OTU-OTU43		0.37	13700	OTU-OTU4->OTU-OTU43		OTU-OTU4->OTU-OTU43	FALSE		0.004501	0.014676	[-0.0070946315241756834]	3	[-0.013736298112577094]	[correl_spearman=copresence, dist_kullbackleibler=copresence, dist_bray=copresence]	[correl_spearman=0.36714718137609165	[correl_spearman	0.367147	[0.37934802001283796, 4.090339014739677, 0.5809242784305318]	[0.1393242171935429]	[0.36714718137609165, 4.3106394314633905, 0.6038603342493598]	[0.37550140050943426, 3.826233427843354, 0.5855414049781322]	copresence	[0.36714718137609165]	[98.0, 98.0, 98.0]	[0.14122812511637806, 1.3724565537648765, 0.0712999547236622]	0.004501	[correl_spearman=0.147784165278197, dist_kullbackleibler=0.0020568555384083975, dist_bray=0.36497976953326106]	[correl_spearman, dist_kullbackleibler, dist_bray]
12861	12793	Undirected	519	OTU-OTU4->OTU-OTU52		0.6	13687	OTU-OTU4->OTU-OTU52		OTU-OTU4->OTU-OTU52	FALSE		0	0	[0.6734778404433619]	3	[0.6668240839406044]	[dist_bray=copresence, correl_spearman=copresence, dist_kullbackleibler=copresence]	[dist_bray=0.43929847907492925	correl_spearman	0.600019	[0.4261815488327126, 0.5921845576928138, 1.9160103348451443]	[0.06421794544686811]	[0.43929847907492925, 0.6000194511017629, 1.9273649857667514]	[0.42365722981160253, 0.5991852198375487, 1.8675960888047964]	copresence	[0.43929847907492925]	[100.0, 100.0, 100.0]	[0.06421359638948494, 0.08837852385832452, 0.46365166896472676]	0	[dist_bray=0.17114766001541404, correl_spearman=0.02252155832443714, dist_kullbackleibler=1.0717648990521411E-11]	[dist_bray, correl_spearman, dist_kullbackleibler]
12861	12884	Undirected	520	OTU-OTU4->OTU-OTU55		0.3	13686	OTU-OTU4->OTU-OTU55		OTU-OTU4->OTU-OTU55	FALSE		0.000717	0.002792	[10.018033500769743]	3	[10.741573839271522]	[dist_kullbackleibler=mutualExclusion, dist_bray=mutualExclusion, correl_spearman=mutualExclusion]	[dist_kullbackleibler=17.708701675215345	correl_spearman	-0.30088	[16.615836588921, 0.9315024315050598, -0.313102080873325]	[2.991603202526107]	[17.708701675215345, 0.9435793239771043, -0.3008800753883673]	[17.62074009964237, 0.9400346522676696, -0.3216933058632538]	mutualExclusion	[17.708701675215345]	[90.0, 90.0, 90.0]	[2.7971985855277124, 0.033109860152051106, 0.1412646235960706]	0.000717	[dist_kullbackleibler=2.22122339164188E-4, dist_bray=0.30620213941088004, correl_spearman=0.20095338305543864]	[dist_kullbackleibler, dist_bray, correl_spearman]
12861	12879	Undirected	521	OTU-OTU4->OTU-OTU58		0.35	13684	OTU-OTU4->OTU-OTU58		OTU-OTU4->OTU-OTU58	FALSE		0.000193	0.000868	[0.00848240944978488]	3	[0.012467003468633409]	[correl_spearman=copresence, dist_kullbackleibler=copresence, dist_bray=copresence]	[correl_spearman=0.34642445315928166	[correl_spearman	0.346424	[0.32774468535448154, 4.8164860207682105, 0.5661789276153468]	[0.15752358117736392]	[0.34642445315928166, 4.841831079934266, 0.5579003867286807]	[0.3373299831489082, 4.712022473393132, 0.561943564983921]	copresence	[0.34642445315928166]	[70.0, 70.0, 70.0]	[0.14664826070766893, 1.63318358007308, 0.10909910352849785]	0.000193	[correl_spearman=0.20517050937873843, dist_kullbackleibler=5.621600112060143E-5, dist_bray=0.2772007038356453]	[correl_spearman, dist_kullbackleibler, dist_bray]
12861	12779	Undirected	522	OTU-OTU4->OTU-OTU61		0.42	13664	OTU-OTU4->OTU-OTU61		OTU-OTU4->OTU-OTU61	FALSE		0	1e-06	[0.6419787701191542]	3	[0.6449267067847256]	[dist_bray=copresence, dist_kullbackleibler=copresence, correl_spearman=copresence]	[dist_bray=0.5896583360496414	correl_spearman	0.415614	[0.5685618940023481, 2.9238007207351506, 0.42979098420963163]	[0.05054688250386843]	[0.5896583360496414, 3.0567486538412907, 0.4156137104704474]	[0.5761222406268802, 2.8535518476782067, 0.45101123107904284]	copresence	[0.5896583360496414]	[100.0, 100.0, 100.0]	[0.07591259911024244, 0.5397858512055599, 0.12616449804081456]	0	[dist_bray=0.3908272030918538, dist_kullbackleibler=1.685131334472345E-8, correl_spearman=0.11306991604185507]	[dist_bray, dist_kullbackleibler, correl_spearman]
12861	12839	Undirected	523	OTU-OTU4->OTU-OTU72		0.44	13650	OTU-OTU4->OTU-OTU72		OTU-OTU4->OTU-OTU72	FALSE		2e-06	1.2e-05	[0.7138722915123201]	3	[0.705053922625867]	[dist_bray=copresence, correl_spearman=copresence, dist_kullbackleibler=copresence]	[dist_bray=0.6232631334039289	correl_spearman	0.442662	[0.607833836513808, 0.4563862722733332, 3.512014504595366]	[0.06368532084444438]	[0.6232631334039289, 0.4426616730024433, 3.6920367934083393]	[0.6086211504860353, 0.46551474238847923, 3.277984417706689]	copresence	[0.6232631334039289]	[98.0, 98.0, 98.0]	[0.06791626547690373, 0.12202909879549327, 0.7069576700340116]	2e-06	[dist_bray=0.35455495750289756, correl_spearman=0.09353305387945055, dist_kullbackleibler=6.537918356697148E-7]	[dist_bray, correl_spearman, dist_kullbackleibler]
12861	12837	Undirected	524	OTU-OTU4->OTU-OTU77		0.5	13648	OTU-OTU4->OTU-OTU77		OTU-OTU4->OTU-OTU77	FALSE		0	0	[10.117777355351596]	3	[10.26403038808104]	[dist_kullbackleibler=copresence, dist_bray=copresence, correl_spearman=copresence]	[dist_kullbackleibler=4.709665237174498	correl_spearman	0.501246	[4.313451520083337, 0.6330207016974075, 0.49281491995852333]	[2.091211679878449]	[4.709665237174498, 0.6419262080272706, 0.5012462458057754]	[4.2971641397704206, 0.6344680469050681, 0.5105588933140344]	copresence	[4.709665237174498]	[52.0, 52.0, 52.0]	[1.1759428109043701, 0.07918444976843743, 0.11900619865838913]	0	[dist_kullbackleibler=2.039537427833693E-8, dist_bray=0.2948843626079466, correl_spearman=0.08545192635627885]	[dist_kullbackleibler, dist_bray, correl_spearman]
12861	12826	Undirected	525	OTU-OTU4->OTU-OTU80		0.54	13640	OTU-OTU4->OTU-OTU80		OTU-OTU4->OTU-OTU80	FALSE		0	2e-06	[0.6455483359205902]	3	[0.6437878366816789]	[dist_bray=copresence, dist_kullbackleibler=copresence, correl_spearman=copresence]	[dist_bray=0.5310106467550335	correl_spearman	0.541107	[0.517434615213042, 2.212538141364023, 0.5399176821629886]	[0.05121586362145509]	[0.5310106467550335, 2.313325681093085, 0.5411072213712759]	[0.5189464311610481, 2.172298864238615, 0.5468776973713806]	copresence	[0.5310106467550335]	[100.0, 100.0, 100.0]	[0.05862079543229382, 0.40147724475277613, 0.12063505584276134]	0	[dist_bray=0.3008812045009024, dist_kullbackleibler=1.2580936870065784E-7, correl_spearman=0.05371789834993412]	[dist_bray, dist_kullbackleibler, correl_spearman]
12861	12824	Undirected	526	OTU-OTU4->OTU-OTU85		0.39	13638	OTU-OTU4->OTU-OTU85		OTU-OTU4->OTU-OTU85	FALSE		3e-06	2.1e-05	[7.1698819656461765]	3	[7.177830624610067]	[dist_kullbackleibler=copresence, dist_bray=copresence, correl_spearman=copresence]	[dist_kullbackleibler=3.0258581479548528	correl_spearman	0.392109	[3.109609575465474, 0.529321158039835, 0.3745166722457337]	[1.6077611412783972]	[3.0258581479548528, 0.5280115616277479, 0.39210921840898255]	[2.9661600650034314, 0.5343979134072523, 0.37370241067902876]	copresence	[3.0258581479548528]	[100.0, 100.0, 100.0]	[0.7425955671469445, 0.08027386484378513, 0.12297387941152121]	3e-06	[dist_kullbackleibler=1.1737931233657406E-6, dist_bray=0.2931133798544471, correl_spearman=0.11500522341096475]	[dist_kullbackleibler, dist_bray, correl_spearman]
12861	12822	Undirected	527	OTU-OTU4->OTU-OTU87		0.31	13634	OTU-OTU4->OTU-OTU87		OTU-OTU4->OTU-OTU87	FALSE		0.000469	0.001909	[0.6857523992496793]	3	[0.6788800729720924]	[dist_bray=copresence, correl_spearman=copresence, dist_kullbackleibler=copresence]	[dist_bray=0.6012698162315768	correl_spearman	0.312977	[0.5950479925097192, 0.3213038502925696, 3.5090811474763597]	[0.05670580546649047]	[0.6012698162315768, 0.3129771767616986, 3.528675582666351]	[0.6013328447917455, 0.3244403407197572, 3.5034246579300055]	copresence	[0.6012698162315768]	[100.0, 100.0, 100.0]	[0.07998873688223178, 0.13189637523943473, 0.6970868419096566]	0.000469	[dist_bray=0.3834577198824607, correl_spearman=0.18257444164271747, dist_kullbackleibler=1.2159608310668979E-4]	[dist_bray, correl_spearman, dist_kullbackleibler]
12861	12819	Undirected	528	OTU-OTU4->OTU-OTU89		0.51	13632	OTU-OTU4->OTU-OTU89		OTU-OTU4->OTU-OTU89	FALSE		0	2e-06	[0.015560731995757703]	3	[0.004068843255187012]	[correl_spearman=copresence, dist_kullbackleibler=copresence, dist_bray=copresence]	[correl_spearman=0.506876436676626	[correl_spearman	0.506876	[0.5088879571843075, 3.359420984859347, 0.5147883366948518]	[0.1355741702380383]	[0.506876436676626, 3.811267855323856, 0.5440900758000794]	[0.5492611934696409, 3.2449225184018706, 0.513101134305356]	copresence	[0.506876436676626]	[28.0, 28.0, 28.0]	[0.14113045160010415, 1.1951721535948594, 0.07100524700934455]	0	[correl_spearman=0.0895111447617089, dist_kullbackleibler=1.7148621322959912E-7, dist_bray=0.2000694305314974]	[correl_spearman, dist_kullbackleibler, dist_bray]
12861	12781	Undirected	529	OTU-OTU4->OTU-OTU96		0.49	13619	OTU-OTU4->OTU-OTU96		OTU-OTU4->OTU-OTU96	FALSE		0	0	[0.7257842608085654]	3	[0.720654894747162]	[dist_bray=copresence, dist_kullbackleibler=copresence, correl_spearman=copresence]	[dist_bray=0.6217112694201039	correl_spearman	0.494962	[0.6026577738582753, 3.1164725495573022, 0.49814715087077865]	[0.057612782593657846]	[0.6217112694201039, 3.2227059122738884, 0.4949617038030687]	[0.6065948814952182, 3.077507091574643, 0.5218587566257371]	copresence	[0.6217112694201039]	[100.0, 100.0, 100.0]	[0.05886152228384875, 0.6266878344451716, 0.14274601332658787]	0	[dist_bray=0.3133568396779055, dist_kullbackleibler=7.9747319858825E-12, correl_spearman=0.08970180665089839]	[dist_bray, dist_kullbackleibler, correl_spearman]
12861	12796	Undirected	531	OTU-OTU4->OTU-OTU99		0.51	13616	OTU-OTU4->OTU-OTU99		OTU-OTU4->OTU-OTU99	FALSE		5.6e-05	0.000287	[8.504968859576138]	3	[8.53955985828532]	[dist_kullbackleibler=copresence, dist_bray=copresence, correl_spearman=copresence]	[dist_kullbackleibler=4.084935327267249	correl_spearman	0.513776	[3.8473640442879415, 0.5207473237872258, 0.505840885344171]	[1.5573826062459983]	[4.084935327267249, 0.5332310614539015, 0.5137758438420567]	[3.5050880305969407, 0.5233812141607002, 0.5217727159921461]	copresence	[4.084935327267249]	[88.0, 88.0, 88.0]	[1.4281069550335452, 0.07585091438101164, 0.12846039911008325]	5.6e-05	[dist_kullbackleibler=4.3111383014382554E-5, dist_bray=0.25914571550364807, correl_spearman=0.07488825161908197]	[dist_kullbackleibler, dist_bray, correl_spearman]
12861	12896	Undirected	532	OTU-OTU4->OTU-OTU1		0.42	13359	OTU-OTU4->OTU-OTU1		OTU-OTU4->OTU-OTU1	FALSE		8e-06	4.9e-05	[-0.017327273145582918]	3	[-0.0038188218531091888]	[correl_spearman=copresence, dist_kullbackleibler=copresence, dist_bray=copresence]	[correl_spearman=0.42185770524521565	[correl_spearman	0.421858	[0.4265138080694434, 3.607905523750426, 0.5683411194887782]	[0.15139257272957393]	[0.42185770524521565, 3.688602718310917, 0.5990019719820348]	[0.4540703679609336, 3.660991551025323, 0.5671733154576128]	copresence	[0.42185770524521565]	[96.0, 96.0, 96.0]	[0.1490810093124962, 0.972643396887061, 0.0848034762815821]	8e-06	[correl_spearman=0.132525196769679, dist_kullbackleibler=2.727520530432237E-6, dist_bray=0.2954136103505106]	[correl_spearman, dist_kullbackleibler, dist_bray]
12861	13023	Undirected	533	OTU-OTU4->OTU-OTU3		0.46	13357	OTU-OTU4->OTU-OTU3		OTU-OTU4->OTU-OTU3	FALSE		0.000168	0.000777	[8.999674553612824]	3	[9.118796269047646]	[dist_kullbackleibler=copresence, correl_spearman=copresence, dist_bray=copresence]	[dist_kullbackleibler=4.4595551237136615	correl_spearman	0.455968	[4.434171569050905, 0.42809360943466424, 0.5630849891298962]	[1.7298120098753678]	[4.4595551237136615, 0.45596766795643695, 0.5453067830372209]	[4.501527561725917, 0.43261074612051975, 0.5592168561815534]	copresence	[4.4595551237136615]	[68.0, 68.0, 68.0]	[1.555370005809737, 0.1261509225515134, 0.09261141687815945]	0.000168	[dist_kullbackleibler=8.622890965948038E-5, correl_spearman=0.11513921445240544, dist_bray=0.2780201073411257]	[dist_kullbackleibler, correl_spearman, dist_bray]
12861	12804	Undirected	534	OTU-OTU4->OTU-OTU100		0.44	12889	OTU-OTU4->OTU-OTU100		OTU-OTU4->OTU-OTU100	FALSE		7e-06	4.5e-05	[7.474647000800244]	3	[7.371637511060349]	[dist_kullbackleibler=copresence, correl_spearman=copresence, dist_bray=copresence]	[dist_kullbackleibler=3.5302825841578387	correl_spearman	0.436565	[3.3684090710731414, 0.4396140591605759, 0.5873967139247485]	[1.721400513509237]	[3.5302825841578387, 0.43656453806520107, 0.6131835313308512]	[3.342043685424284, 0.44456092395025065, 0.5885962461421838]	copresence	[3.5302825841578387]	[100.0, 100.0, 100.0]	[0.7726222063152904, 0.12321071017725582, 0.07050642821723173]	7e-06	[dist_kullbackleibler=2.627340759842056E-6, correl_spearman=0.10405521169283338, dist_bray=0.3526664252093231]	[dist_kullbackleibler, correl_spearman, dist_bray]
12861	12881	Undirected	535	OTU-OTU4->OTU-OTU109		0.51	12882	OTU-OTU4->OTU-OTU109		OTU-OTU4->OTU-OTU109	FALSE		0	0	[]	3	[]	[dist_bray=copresence, correl_spearman=copresence, dist_kullbackleibler=copresence]	[dist_bray=0.5868329589937167	correl_spearman	0.513759	[-100.0, -100.0, -100.0]	[]	[0.5868329589937167, 0.513759396520133, 3.574408082228506]	[-100.0, -100.0, -100.0]	copresence	[0.5868329589937167]	[-4.0, -4.0, -4.0]	[-100.0, -100.0, -100.0]	0	[dist_bray=0.1987141740419358, correl_spearman=0.09804545173798407, dist_kullbackleibler=5.076594700170745E-10]	[dist_bray, correl_spearman, dist_kullbackleibler]
12861	12787	Undirected	536	OTU-OTU4->OTU-OTU110		0.53	12864	OTU-OTU4->OTU-OTU110		OTU-OTU4->OTU-OTU110	FALSE		0.000141	0.000658	[0.6872788185756185]	3	[0.689197259886599]	[dist_bray=mutualExclusion, correl_spearman=mutualExclusion, dist_kullbackleibler=mutualExclusion]	[dist_bray=0.8484012733108548	correl_spearman	-0.525827	[0.8372779839802145, -0.5137865518393109, 10.45612275135257]	[0.06431660308925949]	[0.8484012733108548, -0.5258268813002572, 10.844820263348334]	[0.8453338008997195, -0.5089861170056929, 10.659492344437734]	mutualExclusion	[0.8484012733108548]	[100.0, 100.0, 100.0]	[0.042746411880025904, 0.11982468945931955, 1.4500800494835395]	0.000141	[dist_bray=0.23692661124221348, correl_spearman=0.06978890763493584, dist_kullbackleibler=1.3713993712261008E-4]	[dist_bray, correl_spearman, dist_kullbackleibler]
12858	12908	Undirected	538	OTU-OTU64->OTU-OTU11		0.54	14034	OTU-OTU64->OTU-OTU11		OTU-OTU64->OTU-OTU11	FALSE		0	0	[-0.004053821398540043]	3	[0.005351768142751164]	[correl_spearman=copresence, dist_kullbackleibler=copresence, dist_bray=copresence]	[correl_spearman=0.5363350489604138	[correl_spearman	0.536335	[0.5379267195671447, 4.370085070367816, 0.6488322803272226]	[0.12948951087278082]	[0.5363350489604138, 4.54990978317993, 0.6605946210683655]	[0.5562690397523871, 4.312564114457366, 0.6679337940115433]	copresence	[0.5363350489604138]	[32.0, 32.0, 32.0]	[0.12126130635013209, 1.0721065534029615, 0.10573040070783063]	0	[correl_spearman=0.06308329781496713, dist_kullbackleibler=3.461886333155917E-11, dist_bray=0.2911736803600473]	[correl_spearman, dist_kullbackleibler, dist_bray]
12858	12789	Undirected	539	OTU-OTU64->OTU-OTU31		0.63	14011	OTU-OTU64->OTU-OTU31		OTU-OTU64->OTU-OTU31	FALSE		0	0	[6.822293160112409]	3	[6.885252023059414]	[dist_kullbackleibler=copresence, correl_spearman=copresence, dist_bray=copresence]	[dist_kullbackleibler=2.4043349827373683	correl_spearman	0.629404	[2.3834582370222193, 0.6124635495255564, 0.4768611830509476]	[1.5247155358777063]	[2.4043349827373683, 0.6294042297490839, 0.4748252473770329]	[2.411440689701951, 0.6253522724921792, 0.47737623072624774]	copresence	[2.4043349827373683]	[100.0, 100.0, 100.0]	[0.5639856768952239, 0.11068427991673875, 0.06711565508444471]	0	[dist_kullbackleibler=1.02068409280065E-9, correl_spearman=0.027408041554263685, dist_bray=0.20524977545556822]	[dist_kullbackleibler, correl_spearman, dist_bray]
12858	12767	Undirected	540	OTU-OTU64->OTU-OTU43		0.49	13994	OTU-OTU64->OTU-OTU43		OTU-OTU64->OTU-OTU43	FALSE		0	0	[-0.03201206556161208]	3	[-0.021809333574052462]	[correl_spearman=copresence, dist_bray=copresence, dist_kullbackleibler=copresence]	[correl_spearman=0.48751565369204525	[correl_spearman	0.487516	[0.48028869500146465, 0.5383247722330237, 3.1502526519581493]	[0.14030736863704163]	[0.48751565369204525, 0.5290845612197992, 3.1064258284941944]	[0.500317165541749, 0.5452111051014298, 3.14948005806444]	copresence	[0.48751565369204525]	[98.0, 98.0, 98.0]	[0.12009748368456767, 0.08119987922571234, 0.7260814389572882]	0	[correl_spearman=0.07369060650333659, dist_bray=0.2703850030230327, dist_kullbackleibler=6.2482642393391075E-9]	[correl_spearman, dist_bray, dist_kullbackleibler]
12858	12922	Undirected	541	OTU-OTU64->OTU-OTU44		0.5	13992	OTU-OTU64->OTU-OTU44		OTU-OTU64->OTU-OTU44	FALSE		0.000117	0.00056	[8.903491822018502]	3	[8.9337782480084]	[dist_kullbackleibler=copresence, correl_spearman=copresence, dist_bray=copresence]	[dist_kullbackleibler=4.238755576449371	correl_spearman	0.497962	[4.322858885642682, 0.4708066321985327, 0.5196542513737404]	[1.8960190486194552]	[4.238755576449371, 0.49796218307223056, 0.5075003525391142]	[4.342037003408633, 0.48628154184125144, 0.5166675498809639]	copresence	[4.238755576449371]	[90.0, 90.0, 90.0]	[1.5054747746225312, 0.13367735722986165, 0.10898718838479651]	0.000117	[dist_kullbackleibler=8.565617763411915E-5, correl_spearman=0.0925808096646551, dist_bray=0.2351226339795509]	[dist_kullbackleibler, correl_spearman, dist_bray]
12858	12793	Undirected	542	OTU-OTU64->OTU-OTU52		0.49	13984	OTU-OTU64->OTU-OTU52		OTU-OTU64->OTU-OTU52	FALSE		0	0	[7.0154992388818105]	3	[7.197162208080782]	[dist_kullbackleibler=copresence, dist_bray=copresence, correl_spearman=copresence]	[dist_kullbackleibler=2.5634790884718774	correl_spearman	0.492466	[2.568278153098871, 0.5274894015632658, 0.48612315475441875]	[1.5384719500538169]	[2.5634790884718774, 0.5246433805325563, 0.4924660803781444]	[2.5530137975572136, 0.5345612824223114, 0.5015984250761026]	copresence	[2.5634790884718774]	[100.0, 100.0, 100.0]	[0.5942023445587168, 0.07031018274886826, 0.155282846633093]	0	[dist_kullbackleibler=9.56976720090097E-10, dist_bray=0.25433386557086235, correl_spearman=0.10694161235936944]	[dist_kullbackleibler, dist_bray, correl_spearman]
12858	12886	Undirected	543	OTU-OTU64->OTU-OTU54		0.7	13982	OTU-OTU64->OTU-OTU54		OTU-OTU64->OTU-OTU54	FALSE		6e-06	3.8e-05	[0.006001241985525603]	3	[0.004615621891534245]	[correl_spearman=mutualExclusion, dist_kullbackleibler=mutualExclusion, dist_bray=mutualExclusion]	[correl_spearman=-0.6989446499142152	[correl_spearman	-0.698945	[-0.6833644382169334, 9.885858188534407, 0.8098792492478512]	[0.14725547417775162]	[-0.6989446499142152, 10.15157271115076, 0.8197159014207905]	[-0.6814353716962184, 9.891691323238343, 0.8126355965320942]	mutualExclusion	[-0.6989446499142152]	[100.0, 100.0, 100.0]	[0.08895104155404511, 1.0535382023076898, 0.03639582909356355]	6e-06	[correl_spearman=0.010534409731138838, dist_kullbackleibler=2.9213686910334324E-5, dist_bray=0.2582450220651453]	[correl_spearman, dist_kullbackleibler, dist_bray]
12858	12773	Undirected	544	OTU-OTU64->OTU-OTU65		0.48	13973	OTU-OTU64->OTU-OTU65		OTU-OTU64->OTU-OTU65	FALSE		0	0	[0.006661246905244479]	3	[0.0014096057967227019]	[correl_spearman=copresence, dist_bray=copresence, dist_kullbackleibler=copresence]	[correl_spearman=0.47688797736685745	[correl_spearman	0.476888	[0.45185120732350614, 0.42996949085248454, 3.273737488076199]	[0.16101967927848534]	[0.47688797736685745, 0.4420445965437815, 3.0519935359475165]	[0.4741327055026146, 0.41843109867995376, 2.9412049445743076]	copresence	[0.47688797736685745]	[44.0, 44.0, 44.0]	[0.15861633524097907, 0.08427252709818993, 1.5081546490835542]	0	[correl_spearman=0.12902648619171714, dist_bray=0.09435497632760015, dist_kullbackleibler=5.049287654657064E-9]	[correl_spearman, dist_bray, dist_kullbackleibler]
12858	12822	Undirected	545	OTU-OTU64->OTU-OTU87		0.41	13944	OTU-OTU64->OTU-OTU87		OTU-OTU64->OTU-OTU87	FALSE		0	4e-06	[0.7175640735294592]	3	[0.7133767985282714]	[dist_bray=copresence, dist_kullbackleibler=copresence, correl_spearman=copresence]	[dist_bray=0.5894024624133207	correl_spearman	0.41176	[0.5980662817140897, 3.430028179226329, 0.4212994174113102]	[0.06026136662221523]	[0.5894024624133207, 3.517398525536585, 0.41176008181966567]	[0.6000603747684108, 3.448042296411507, 0.43601435556313445]	copresence	[0.5894024624133207]	[100.0, 100.0, 100.0]	[0.08279083197964246, 0.6072270432642738, 0.14361209126957503]	0	[dist_bray=0.3443006486036764, dist_kullbackleibler=1.166107419514617E-7, correl_spearman=0.1371216258210725]	[dist_bray, dist_kullbackleibler, correl_spearman]
12858	12798	Undirected	546	OTU-OTU64->OTU-OTU98		0.43	13932	OTU-OTU64->OTU-OTU98		OTU-OTU64->OTU-OTU98	FALSE		2.5e-05	0.000138	[13.636769879825476]	3	[13.457836206286451]	[dist_kullbackleibler=mutualExclusion, correl_spearman=mutualExclusion, dist_bray=mutualExclusion]	[dist_kullbackleibler=20.77089012554452	correl_spearman	-0.434304	[19.815007631409188, -0.42912114848897587, 0.9630765461432165]	[3.232577993695705]	[20.77089012554452, -0.4343041260267109, 0.9646095331852987]	[19.873087688009953, -0.43734132519654634, 0.9699518723368672]	mutualExclusion	[20.77089012554452]	[86.0, 86.0, 86.0]	[2.195158572178773, 0.14059010500444613, 0.02274391770662226]	2.5e-05	[dist_kullbackleibler=8.904421080258018E-6, correl_spearman=0.12916212448822506, dist_bray=0.3096982105233359]	[dist_kullbackleibler, correl_spearman, dist_bray]
12858	12804	Undirected	547	OTU-OTU64->OTU-OTU100		0.33	13511	OTU-OTU64->OTU-OTU100		OTU-OTU64->OTU-OTU100	FALSE		0.00067	0.002624	[-0.0033522920830059643]	3	[-0.0025182418127540833]	[correl_spearman=copresence, dist_bray=copresence, dist_kullbackleibler=copresence]	[correl_spearman=0.32577574462651965	[correl_spearman	0.325776	[0.3220967548910899, 0.6246064097859813, 4.356797857083287]	[0.15516694200239955]	[0.32577574462651965, 0.616501465819074, 4.260474153594568]	[0.347653829402232, 0.6388212353898602, 4.217585554691761]	copresence	[0.32577574462651965]	[100.0, 100.0, 100.0]	[0.1450774621045461, 0.08627240289093473, 1.1197581290707805]	0.00067	[correl_spearman=0.19703680698869924, dist_bray=0.35734421173770625, dist_kullbackleibler=1.7982200040378427E-4]	[correl_spearman, dist_bray, dist_kullbackleibler]
12858	12787	Undirected	548	OTU-OTU64->OTU-OTU110		0.41	13499	OTU-OTU64->OTU-OTU110		OTU-OTU64->OTU-OTU110	FALSE		0.000155	0.000721	[6.864679923265652]	3	[6.88477468539519]	[dist_kullbackleibler=mutualExclusion, correl_spearman=mutualExclusion, dist_bray=mutualExclusion]	[dist_kullbackleibler=11.377034948536457	correl_spearman	-0.414352	[11.10262700122129, -0.40397592104398583, 0.8587802055241021]	[1.3379928781917763]	[11.377034948536457, -0.41435241886728996, 0.8677629944098453]	[11.258097263309967, -0.4249116336885759, 0.8675610434776888]	mutualExclusion	[11.377034948536457]	[100.0, 100.0, 100.0]	[1.227198752463013, 0.14262602183560882, 0.03701910379493209]	0.000155	[dist_kullbackleibler=7.020428454773686E-5, correl_spearman=0.1491990820294934, dist_bray=0.24122519027590172]	[dist_kullbackleibler, correl_spearman, dist_bray]
12853	12837	Undirected	550	OTU-OTU20->OTU-OTU77		0.33	13874	OTU-OTU20->OTU-OTU77		OTU-OTU20->OTU-OTU77	FALSE		0.004349	0.014235	[7.722486407317082]	3	[7.704299022442434]	[dist_kullbackleibler=copresence, dist_bray=copresence, correl_spearman=copresence]	[dist_kullbackleibler=5.458253099501152	correl_spearman	0.329197	[5.08972491399377, 0.6274870642014353, 0.3340717919688909]	[1.3257992933548521]	[5.458253099501152, 0.6423993849867906, 0.3291972458748991]	[4.988758871576145, 0.6191870017475929, 0.3302371483179973]	copresence	[5.458253099501152]	[52.0, 52.0, 52.0]	[0.8030128559741614, 0.05883183137908911, 0.12109160597403773]	0.004349	[dist_kullbackleibler=0.0017631524143180144, dist_bray=0.31959196231248743, correl_spearman=0.18918341952344536]	[dist_kullbackleibler, dist_bray, correl_spearman]
12849	12822	Undirected	551	OTU-OTU86->OTU-OTU87		0.34	12850	OTU-OTU86->OTU-OTU87		OTU-OTU86->OTU-OTU87	FALSE		0.004086	0.013447	[0.6647983849853192]	3	[0.6626139985546347]	[dist_bray=copresence, correl_spearman=copresence, dist_kullbackleibler=copresence]	[dist_bray=0.5386388635307457	correl_spearman	0.340604	[0.5238470363321048, 0.33918525036459796, 2.6791321305190148]	[0.05651980234944085]	[0.5386388635307457, 0.3406039024718651, 2.816475298165144]	[0.5104287901946655, 0.35755452932449294, 2.7579380954723636]	copresence	[0.5386388635307457]	[100.0, 100.0, 100.0]	[0.08226335085296899, 0.15041840191482395, 0.7935130837645251]	0.004086	[dist_bray=0.3142571791258013, correl_spearman=0.1728186747547133, dist_kullbackleibler=0.0018250396165084837]	[dist_bray, correl_spearman, dist_kullbackleibler]
12847	12804	Undirected	552	OTU-OTU27->OTU-OTU100		0.38	13728	OTU-OTU27->OTU-OTU100		OTU-OTU27->OTU-OTU100	FALSE		0.000291	0.001256	[7.919284611506956]	3	[8.041244604794517]	[dist_kullbackleibler=copresence, correl_spearman=copresence, dist_bray=copresence]	[dist_kullbackleibler=4.147843456599868	correl_spearman	0.379395	[4.183660968320903, 0.3744450083356925, 0.5650499236331491]	[1.7536923926126133]	[4.147843456599868, 0.37939493917902434, 0.5720159555630322]	[4.161820284208737, 0.3758355389848498, 0.5638115299364096]	copresence	[4.147843456599868]	[92.0, 92.0, 92.0]	[1.0900102462360632, 0.12931569769128234, 0.07126316685649746]	0.000291	[dist_kullbackleibler=1.0999635238051475E-4, correl_spearman=0.14835710267204177, dist_bray=0.30782998418303253]	[dist_kullbackleibler, correl_spearman, dist_bray]
12847	13011	Undirected	554	OTU-OTU27->OTU-OTU7		0.48	13715	OTU-OTU27->OTU-OTU7		OTU-OTU27->OTU-OTU7	FALSE		0	2e-06	[9.715143571060015]	3	[9.633406731953473]	[dist_kullbackleibler=copresence, correl_spearman=copresence, dist_bray=copresence]	[dist_kullbackleibler=3.886392056092168	correl_spearman	0.483178	[3.9462174933182177, 0.48319526699387916, 0.526853104149166]	[1.9467302488811076]	[3.886392056092168, 0.483177588654653, 0.5063117518259029]	[3.841526806648454, 0.49524528110454985, 0.5278210271706638]	copresence	[3.886392056092168]	[88.0, 88.0, 88.0]	[1.2043405004668215, 0.14838517943907908, 0.11166330521839686]	0	[dist_kullbackleibler=1.095797720340741E-7, correl_spearman=0.1064490111199029, dist_bray=0.23932376270905087]	[dist_kullbackleibler, correl_spearman, dist_bray]
12847	12787	Undirected	555	OTU-OTU27->OTU-OTU110		0.65	13711	OTU-OTU27->OTU-OTU110		OTU-OTU27->OTU-OTU110	FALSE		1.6e-05	9.2e-05	[6.645980988402937]	3	[6.792863525031996]	[dist_kullbackleibler=mutualExclusion, correl_spearman=mutualExclusion, dist_bray=mutualExclusion]	[dist_kullbackleibler=11.834367221376048	correl_spearman	-0.649804	[11.602064789731264, -0.6395544834699581, 0.8386970396711887]	[1.3392815315481015]	[11.834367221376048, -0.6498037677164681, 0.8415173238642422]	[11.822389788349536, -0.6623819699555931, 0.8555637341472206]	mutualExclusion	[11.834367221376048]	[92.0, 92.0, 92.0]	[1.3475085749895837, 0.13670366411818055, 0.06689233033375096]	1.6e-05	[dist_kullbackleibler=1.7145125163597896E-5, correl_spearman=0.044285503824363914, dist_bray=0.2949229067502117]	[dist_kullbackleibler, correl_spearman, dist_bray]
[truncated: 568 more rows]
